# Supplementary material for: On Some Properties of the Hofstadter–Mertens Function
Source: Hindawi journal article supplement (doi:10.1155/2020/1816756), 2020-09-15
Supplement: f1 [file 1816756.f1.zip]

Archive with 7 entries (7 files):
- Figure1.dat
- Figure2.dat
- Figure3.dat
- Figure4.dat
- Figure6.dat
- Figure7.dat
- Figure8.dat
