# Supplementary material for: On Some Properties of the Hofstadter–Mertens Function
Source: Hindawi journal article supplement (doi:10.1155/2020/1816756), 2020-09-15
Supplement: f1 [file 1816756.f1.zip › Figure1.dat]

{{1	1}	{501	244}	{1001	533}	{1501	752}	{2001	1046}
{2501	1238}	{3001	1509}	{3501	1575}	{4001	2031}	{4501	2322}
{5001	2516}	{5501	2792}	{6001	3005}	{6501	3347}	{7001	3653}
{7501	3951}	{8001	4083}	{8501	3985}	{9001	4571}	{9501	4913}
{10001	5064}	{10501	5306}	{11001	5490}	{11501	5773}
{12001	5998}	{12501	5982}	{13001	7200}	{13501	6940}
{14001	7142}	{14501	7019}	{15001	7367}	{15501	7916}
{16001	8120}	{16501	7772}	{17001	8223}	{17501	8211}
{18001	9537}	{18501	9134}	{19001	9413}	{19501	9417}
{20001	9851}	{20501	10103}	{21001	10442}	{21501	10813}
{22001	11089}	{22501	11240}	{23001	11616}	{23501	11753}
{24001	12013}	{24501	11743}	{25001	12820}	{25501	12999}
{26001	13244}	{26501	12622}	{27001	13226}	{27501	14312}
{28001	12695}	{28501	14899}	{29001	13675}	{29501	14642}
{30001	15448}	{30501	15198}	{31001	14659}	{31501	15671}
{32001	16326}	{32501	16328}	{33001	18061}	{33501	16862}
{34001	18203}	{34501	17642}	{35001	16632}	{35501	17456}
{36001	16846}	{36501	18426}	{37001	19537}	{37501	18363}
{38001	19111}	{38501	18597}	{39001	18501}	{39501	19562}
{40001	20081}	{40501	19536}	{41001	19975}	{41501	20558}
{42001	20955}	{42501	20777}	{43001	21577}	{43501	21771}
{44001	21955}	{44501	22315}	{45001	22426}	{45501	22758}
{46001	23006}	{46501	23290}	{47001	23470}	{47501	23476}
{48001	23941}	{48501	24850}	{49001	23917}	{49501	24048}
{50001	26288}	{50501	25730}	{51001	27734}	{51501	25882}
{52001	23886}	{52501	28039}	{53001	26745}	{53501	26278}
{54001	27368}	{54501	26601}	{55001	27347}	{55501	27852}
{56001	28382}	{56501	27142}	{57001	28171}	{57501	29167}
{58001	28668}	{58501	30148}	{59001	29837}	{59501	29123}
{60001	29528}	{60501	32029}	{61001	30091}	{61501	30446}
{62001	32668}	{62501	31413}	{63001	31842}	{63501	31909}
{64001	32011}	{64501	32739}	{65001	33531}	{65501	35078}
{66001	34345}	{66501	32924}	{67001	33212}	{67501	34664}
{68001	35204}	{68501	33932}	{69001	35319}	{69501	36374}
{70001	37184}	{70501	35314}	{71001	33828}	{71501	33551}
{72001	34310}	{72501	35051}	{73001	34967}	{73501	36025}
{74001	36627}	{74501	38301}	{75001	37137}	{75501	38377}
{76001	38388}	{76501	38669}	{77001	40357}	{77501	39569}
{78001	39293}	{78501	37918}	{79001	38137}	{79501	40383}
{80001	39157}	{80501	39677}	{81001	41524}	{81501	40924}
{82001	41774}	{82501	41802}	{83001	41346}	{83501	43498}
{84001	42705}	{84501	41892}	{85001	42095}	{85501	41664}
{86001	42584}	{86501	43292}	{87001	44093}	{87501	43416}
{88001	43935}	{88501	44422}	{89001	44402}	{89501	45182}
{90001	45493}	{90501	45027}	{91001	45123}	{91501	45811}
{92001	46072}	{92501	46038}	{93001	46480}	{93501	46779}
{94001	47051}	{94501	47082}	{95001	47560}	{95501	47517}
{96001	47479}	{96501	49192}	{97001	49422}	{97501	46790}
{98001	47735}	{98501	47764}	{99001	51171}	{99501	49590}
{100001	53471}	{100501	50866}	{101001	51847}	{101501	48778}
{102001	49897}	{102501	50812}	{103001	50543}	{103501	54655}
{104001	53309}	{104501	51285}	{105001	55860}	{105501	52716}
{106001	52620}	{106501	53577}	{107001	52946}	{107501	53847}
{108001	54556}	{108501	51441}	{109001	54001}	{109501	51761}
{110001	55525}	{110501	59871}	{111001	55078}	{111501	55937}
{112001	56369}	{112501	58834}	{113001	56002}	{113501	59109}
{114001	56834}	{114501	52956}	{115001	59634}	{115501	55966}
{116001	56361}	{116501	60131}	{117001	56419}	{117501	56567}
{118001	58673}	{118501	58827}	{119001	60974}	{119501	59519}
{120001	61478}	{120501	61025}	{121001	57840}	{121501	56736}
{122001	64520}	{122501	61728}	{123001	62413}	{123501	61899}
{124001	64078}	{124501	63335}	{125001	59835}	{125501	65395}
{126001	61613}	{126501	62922}	{127001	62692}	{127501	63316}
{128001	65038}	{128501	61272}	{129001	62180}	{129501	65707}
{130001	65510}	{130501	68782}	{131001	64147}	{131501	64041}
{132001	66714}	{132501	63592}	{133001	68852}	{133501	64860}
{134001	67580}	{134501	66010}	{135001	67432}	{135501	66336}
{136001	72654}	{136501	68324}	{137001	65106}	{137501	66309}
{138001	68154}	{138501	71761}	{139001	66834}	{139501	70168}
{140001	75677}	{140501	67483}	{141001	72121}	{141501	71522}
{142001	74011}	{142501	72228}	{143001	72048}	{143501	72983}
{144001	72437}	{144501	70789}	{145001	73739}	{145501	69378}
{146001	73729}	{146501	70565}	{147001	77266}	{147501	75716}
{148001	71565}	{148501	75830}	{149001	76818}	{149501	73814}
{150001	74709}	{150501	76124}	{151001	76114}	{151501	74893}
{152001	78188}	{152501	74110}	{153001	79605}	{153501	76864}
{154001	76835}	{154501	78275}	{155001	77979}	{155501	76468}
{156001	76023}	{156501	78646}	{157001	79948}	{157501	77499}
{158001	78803}	{158501	79474}	{159001	79254}	{159501	79663}
{160001	78935}	{160501	79308}	{161001	81546}	{161501	83080}
{162001	81287}	{162501	79588}	{163001	80028}	{163501	80104}
{164001	81671}	{164501	82857}	{165001	83269}	{165501	82964}
{166001	83649}	{166501	86236}	{167001	83029}	{167501	84509}
{168001	82359}	{168501	82510}	{169001	83220}	{169501	86089}
{170001	83483}	{170501	83535}	{171001	84645}	{171501	86483}
{172001	87946}	{172501	86875}	{173001	86357}	{173501	87248}
{174001	87549}	{174501	87371}	{175001	89408}	{175501	87838}
{176001	87530}	{176501	88450}	{177001	88841}	{177501	89112}
{178001	89465}	{178501	89286}	{179001	89658}	{179501	90631}
{180001	89877}	{180501	90795}	{181001	89682}	{181501	90181}
{182001	90628}	{182501	91428}	{183001	91023}	{183501	92734}
{184001	92211}	{184501	92144}	{185001	93056}	{185501	93161}
{186001	93209}	{186501	93250}	{187001	93339}	{187501	94145}
{188001	94209}	{188501	94097}	{189001	94152}	{189501	95305}
{190001	95346}	{190501	96065}	{191001	94296}	{191501	96871}
{192001	95684}	{192501	95437}	{193001	99519}	{193501	97537}
{194001	97695}	{194501	102086}	{195001	99586}	{195501	96143}
{196001	94581}	{196501	95359}	{197001	98797}	{197501	98921}
{198001	100406}	{198501	97597}	{199001	100125}	{199501	101341}
{200001	101921}	{200501	97139}	{201001	100113}	{201501	102575}
{202001	100241}	{202501	104180}	{203001	94749}	{203501	101154}
{204001	98395}	{204501	105350}	{205001	108731}	{205501	102596}
{206001	107631}	{206501	103377}	{207001	98644}	{207501	102600}
{208001	100384}	{208501	104416}	{209001	101690}	{209501	106769}
{210001	106635}	{210501	102614}	{211001	100773}	{211501	109376}
{212001	107739}	{212501	108544}	{213001	104701}	{213501	104302}
{214001	111323}	{214501	111131}	{215001	107833}	{215501	111802}
{216001	105530}	{216501	106319}	{217001	112530}	{217501	111037}
{218001	117979}	{218501	114816}	{219001	107252}	{219501	108051}
{220001	110600}	{220501	109736}	{221001	105351}	{221501	103971}
{222001	116339}	{222501	117117}	{223001	111705}	{223501	112661}
{224001	116471}	{224501	113489}	{225001	111631}	{225501	117446}
{226001	108422}	{226501	123244}	{227001	115513}	{227501	112861}
{228001	113396}	{228501	112467}	{229001	119624}	{229501	115550}
{230001	118985}	{230501	116228}	{231001	113836}	{231501	113014}
{232001	117424}	{232501	113492}	{233001	115895}	{233501	118572}
{234001	114708}	{234501	123637}	{235001	118697}	{235501	122514}
{236001	118761}	{236501	123581}	{237001	114535}	{237501	125165}
{238001	117645}	{238501	117718}	{239001	121102}	{239501	115071}
{240001	114283}	{240501	123219}	{241001	117768}	{241501	120522}
{242001	121269}	{242501	123976}	{243001	113735}	{243501	128426}
{244001	118249}	{244501	120214}	{245001	121194}	{245501	125260}
{246001	128619}	{246501	125125}	{247001	126479}	{247501	123803}
{248001	121897}	{248501	123858}	{249001	126216}	{249501	125038}
{250001	121454}	{250501	129981}	{251001	126245}	{251501	129364}
{252001	122357}	{252501	132161}	{253001	128191}	{253501	128119}
{254001	133975}	{254501	131809}	{255001	130575}	{255501	137930}
{256001	135414}	{256501	125927}	{257001	127588}	{257501	124145}
{258001	124197}	{258501	124696}	{259001	127104}	{259501	130960}
{260001	123142}	{260501	131045}	{261001	128834}	{261501	126924}
{262001	128733}	{262501	133916}	{263001	128033}	{263501	125176}
{264001	136465}	{264501	139179}	{265001	128996}	{265501	127498}
{266001	136829}	{266501	132521}	{267001	135306}	{267501	131584}
{268001	134501}	{268501	137216}	{269001	133826}	{269501	135346}
{270001	130095}	{270501	135099}	{271001	141780}	{271501	131748}
{272001	133253}	{272501	140130}	{273001	135011}	{273501	133458}
{274001	134999}	{274501	141196}	{275001	138744}	{275501	137827}
{276001	140179}	{276501	143329}	{277001	136252}	{277501	132707}
{278001	134284}	{278501	142269}	{279001	134141}	{279501	136594}
{280001	147362}	{280501	139186}	{281001	142025}	{281501	139444}
{282001	147622}	{282501	138691}	{283001	139207}	{283501	138552}
{284001	142459}	{284501	139138}	{285001	141561}	{285501	141806}
{286001	142944}	{286501	141608}	{287001	147360}	{287501	147978}
{288001	136886}	{288501	141610}	{289001	139052}	{289501	145156}
{290001	148745}	{290501	142929}	{291001	144040}	{291501	144411}
{292001	146429}	{292501	147673}	{293001	144347}	{293501	148014}
{294001	148850}	{294501	143962}	{295001	150881}	{295501	151803}
{296001	146956}	{296501	145647}	{297001	145769}	{297501	146890}
{298001	149051}	{298501	148533}	{299001	148946}	{299501	150529}
{300001	149308}	{300501	151768}	{301001	153929}	{301501	147888}
{302001	149674}	{302501	153312}	{303001	150108}	{303501	155117}
{304001	152102}	{304501	150110}	{305001	146488}	{305501	147846}
{306001	149106}	{306501	154769}	{307001	153036}	{307501	150736}
{308001	155926}	{308501	152687}	{309001	154097}	{309501	152514}
{310001	152678}	{310501	154458}	{311001	147946}	{311501	155757}
{312001	157525}	{312501	154270}	{313001	158022}	{313501	157683}
{314001	156464}	{314501	156462}	{315001	154157}	{315501	159438}
{316001	162821}	{316501	154426}	{317001	158458}	{317501	157400}
{318001	160704}	{318501	158501}	{319001	158607}	{319501	158168}
{320001	154734}	{320501	160781}	{321001	157523}	{321501	156363}
{322001	163725}	{322501	163836}	{323001	158117}	{323501	165087}
{324001	161642}	{324501	161762}	{325001	163276}	{325501	158573}
{326001	164308}	{326501	163387}	{327001	160922}	{327501	161447}
{328001	166823}	{328501	166487}	{329001	161261}	{329501	167909}
{330001	164835}	{330501	165983}	{331001	170087}	{331501	163149}
{332001	167103}	{332501	168365}	{333001	169170}	{333501	171311}
{334001	164122}	{334501	168892}	{335001	166939}	{335501	169824}
{336001	165766}	{336501	168852}	{337001	171232}	{337501	168304}
{338001	162212}	{338501	169876}	{339001	170042}	{339501	170240}
{340001	167651}	{340501	169507}	{341001	169543}	{341501	173341}
{342001	172117}	{342501	169349}	{343001	172730}	{343501	172221}
{344001	168552}	{344501	173136}	{345001	170975}	{345501	174221}
{346001	170943}	{346501	172334}	{347001	172647}	{347501	173961}
{348001	173562}	{348501	177031}	{349001	174350}	{349501	176621}
{350001	172713}	{350501	174495}	{351001	176744}	{351501	175154}
{352001	173394}	{352501	173799}	{353001	176038}	{353501	176328}
{354001	178425}	{354501	178339}	{355001	179535}	{355501	177055}
{356001	176544}	{356501	179722}	{357001	180056}	{357501	177614}
{358001	178376}	{358501	178437}	{359001	180261}	{359501	179406}
{360001	179951}	{360501	180290}	{361001	183766}	{361501	182046}
{362001	180870}	{362501	182017}	{363001	182599}	{363501	181361}
{364001	181867}	{364501	182979}	{365001	182639}	{365501	182821}
{366001	184855}	{366501	183570}	{367001	183523}	{367501	184131}
{368001	184225}	{368501	183569}	{369001	185441}	{369501	185196}
{370001	185791}	{370501	185359}	{371001	186713}	{371501	184244}
{372001	185050}	{372501	187110}	{373001	185657}	{373501	187376}
{374001	188888}	{374501	186836}	{375001	187554}	{375501	188810}
{376001	189147}	{376501	187857}	{377001	187831}	{377501	188842}
{378001	188671}	{378501	188239}	{379001	189109}	{379501	189839}
{380001	189248}	{380501	188679}	{381001	188948}	{381501	191082}
{382001	191080}	{382501	190507}	{383001	194468}	{383501	191509}
{384001	190455}	{384501	187487}	{385001	192572}	{385501	188494}
{386001	187433}	{386501	190127}	{387001	190720}	{387501	189279}
{388001	195088}	{388501	196088}	{389001	196630}	{389501	194555}
{390001	204342}	{390501	205474}	{391001	195457}	{391501	196923}
{392001	203404}	{392501	193971}	{393001	195387}	{393501	194054}
{394001	201476}	{394501	197509}	{395001	193891}	{395501	197778}
{396001	194510}	{396501	198764}	{397001	198726}	{397501	194177}
{398001	191532}	{398501	204196}	{399001	191035}	{399501	198982}
{400001	204305}	{400501	201169}	{401001	202528}	{401501	199764}
{402001	198604}	{402501	208433}	{403001	201570}	{403501	199312}
{404001	205267}	{404501	201070}	{405001	210384}	{405501	208208}
{406001	212737}	{406501	195097}	{407001	199136}	{407501	191343}
{408001	209674}	{408501	199474}	{409001	206004}	{409501	210710}
{410001	203079}	{410501	197074}	{411001	212059}	{411501	203810}
{412001	198559}	{412501	213352}	{413001	217606}	{413501	207821}
{414001	209147}	{414501	211521}	{415001	199084}	{415501	206994}
{416001	208055}	{416501	208073}	{417001	205376}	{417501	210172}
{418001	209046}	{418501	203546}	{419001	209513}	{419501	208701}
{420001	213613}	{420501	202620}	{421001	210257}	{421501	211157}
{422001	217642}	{422501	203056}	{423001	218523}	{423501	210962}
{424001	206047}	{424501	214118}	{425001	209993}	{425501	211382}
{426001	203442}	{426501	211676}	{427001	211497}	{427501	224607}
{428001	203983}	{428501	217763}	{429001	218076}	{429501	208301}
{430001	213688}	{430501	213202}	{431001	221247}	{431501	216611}
{432001	213815}	{432501	215764}	{433001	215879}	{433501	216031}
{434001	230169}	{434501	215255}	{435001	203220}	{435501	219262}
{436001	221694}	{436501	216287}	{437001	213753}	{437501	214770}
{438001	219499}	{438501	214873}	{439001	215281}	{439501	232991}
{440001	219463}	{440501	216369}	{441001	222690}	{441501	212191}
{442001	221654}	{442501	227675}	{443001	210697}	{443501	220715}
{444001	217342}	{444501	207982}	{445001	218524}	{445501	227778}
{446001	224066}	{446501	221053}	{447001	222798}	{447501	227842}
{448001	221027}	{448501	222975}	{449001	225438}	{449501	228411}
{450001	237665}	{450501	224432}	{451001	216052}	{451501	223614}
{452001	227120}	{452501	233631}	{453001	237577}	{453501	235950}
{454001	226506}	{454501	238228}	{455001	211740}	{455501	224535}
{456001	236202}	{456501	226649}	{457001	224916}	{457501	227193}
{458001	232906}	{458501	229590}	{459001	222924}	{459501	230039}
{460001	241467}	{460501	235782}	{461001	234454}	{461501	240865}
{462001	228795}	{462501	227289}	{463001	219289}	{463501	243994}
{464001	234444}	{464501	235306}	{465001	241943}	{465501	233463}
{466001	233974}	{466501	232406}	{467001	225983}	{467501	242827}
{468001	233784}	{468501	228086}	{469001	239238}	{469501	234008}
{470001	228245}	{470501	232007}	{471001	236473}	{471501	233579}
{472001	229073}	{472501	240433}	{473001	234248}	{473501	242351}
{474001	230561}	{474501	234362}	{475001	242469}	{475501	246226}
{476001	249591}	{476501	233564}	{477001	239348}	{477501	243662}
{478001	246095}	{478501	237513}	{479001	237804}	{479501	252734}
{480001	244582}	{480501	234370}	{481001	244530}	{481501	222047}
{482001	233194}	{482501	239700}	{483001	226975}	{483501	251693}
{484001	247439}	{484501	244064}	{485001	239962}	{485501	241717}
{486001	253164}	{486501	248752}	{487001	251570}	{487501	235411}
{488001	253426}	{488501	242654}	{489001	245665}	{489501	247596}
{490001	247150}	{490501	242393}	{491001	248089}	{491501	233039}
{492001	240173}	{492501	250896}	{493001	245364}	{493501	261544}
{494001	239722}	{494501	244130}	{495001	245830}	{495501	250517}
{496001	238118}	{496501	248124}	{497001	234527}	{497501	248061}
{498001	238993}	{498501	249741}	{499001	246304}	{499501	243116}
{500001	264689}	{500501	257530}	{501001	242444}	{501501	246730}
{502001	254140}	{502501	250001}	{503001	249952}	{503501	254321}
{504001	243875}	{504501	250051}	{505001	252403}	{505501	255807}
{506001	242939}	{506501	243970}	{507001	254788}	{507501	248065}
{508001	258154}	{508501	250688}	{509001	254969}	{509501	256375}
{510001	253829}	{510501	254987}	{511001	253007}	{511501	257439}
{512001	266847}	{512501	256477}	{513001	264050}	{513501	266447}
{514001	248104}	{514501	256151}	{515001	262427}	{515501	252261}
{516001	257167}	{516501	255632}	{517001	261747}	{517501	253796}
{518001	261718}	{518501	263515}	{519001	246329}	{519501	274779}
{520001	259727}	{520501	259271}	{521001	268977}	{521501	256579}
{522001	261034}	{522501	254511}	{523001	255593}	{523501	263807}
{524001	259982}	{524501	266832}	{525001	267354}	{525501	259371}
{526001	258969}	{526501	258515}	{527001	254641}	{527501	263684}
{528001	259848}	{528501	275176}	{529001	277014}	{529501	262597}
{530001	273810}	{530501	260880}	{531001	278470}	{531501	264954}
{532001	263274}	{532501	272789}	{533001	274635}	{533501	274904}
{534001	270715}	{534501	272819}	{535001	266290}	{535501	263223}
{536001	270880}	{536501	268176}	{537001	278340}	{537501	264113}
{538001	272457}	{538501	254180}	{539001	272305}	{539501	270214}
{540001	271636}	{540501	276682}	{541001	277416}	{541501	266845}
{542001	277970}	{542501	276571}	{543001	278124}	{543501	276089}
{544001	266362}	{544501	277657}	{545001	271361}	{545501	274479}
{546001	272522}	{546501	278961}	{547001	256529}	{547501	276435}
{548001	282091}	{548501	260731}	{549001	265239}	{549501	274853}
{550001	274022}	{550501	280150}	{551001	265651}	{551501	269224}
{552001	274358}	{552501	273284}	{553001	277648}	{553501	285382}
{554001	275489}	{554501	284721}	{555001	266891}	{555501	283768}
{556001	270810}	{556501	277629}	{557001	282625}	{557501	280673}
{558001	272451}	{558501	278267}	{559001	280624}	{559501	273515}
{560001	273469}	{560501	280377}	{561001	282187}	{561501	283654}
{562001	281543}	{562501	271895}	{563001	277679}	{563501	280270}
{564001	274931}	{564501	279192}	{565001	286312}	{565501	291601}
{566001	296356}	{566501	288555}	{567001	275125}	{567501	279977}
{568001	272864}	{568501	289015}	{569001	289858}	{569501	289855}
{570001	283645}	{570501	281417}	{571001	283617}	{571501	280541}
{572001	281179}	{572501	279114}	{573001	277399}	{573501	288671}
{574001	281482}	{574501	281581}	{575001	276517}	{575501	293349}
{576001	284160}	{576501	283213}	{577001	266784}	{577501	281070}
{578001	279420}	{578501	281477}	{579001	285630}	{579501	285346}
{580001	284642}	{580501	288888}	{581001	285772}	{581501	289855}
{582001	290249}	{582501	292268}	{583001	297912}	{583501	284141}
{584001	292180}	{584501	295926}	{585001	300330}	{585501	298273}
{586001	281671}	{586501	291867}	{587001	301206}	{587501	291615}
{588001	296495}	{588501	292996}	{589001	293778}	{589501	298884}
{590001	293029}	{590501	285439}	{591001	293992}	{591501	296758}
{592001	298533}	{592501	301659}	{593001	288905}	{593501	292121}
{594001	295170}	{594501	292463}	{595001	287698}	{595501	292882}
{596001	301500}	{596501	300582}	{597001	301965}	{597501	305919}
{598001	305501}	{598501	308555}	{599001	309649}	{599501	302468}
{600001	301501}	{600501	303072}	{601001	291820}	{601501	300607}
{602001	293728}	{602501	290765}	{603001	303955}	{603501	303992}
{604001	297068}	{604501	312581}	{605001	302464}	{605501	306390}
{606001	302239}	{606501	304105}	{607001	310363}	{607501	303905}
{608001	305508}	{608501	305319}	{609001	298970}	{609501	314293}
{610001	298056}	{610501	311987}	{611001	303629}	{611501	310446}
{612001	309281}	{612501	308195}	{613001	306578}	{613501	312716}
{614001	308256}	{614501	306719}	{615001	312215}	{615501	305676}
{616001	315829}	{616501	307619}	{617001	306682}	{617501	300977}
{618001	314488}	{618501	310021}	{619001	313043}	{619501	307761}
{620001	301004}	{620501	305604}	{621001	304659}	{621501	317150}
{622001	316598}	{622501	311293}	{623001	320710}	{623501	307565}
{624001	322804}	{624501	325308}	{625001	308764}	{625501	311541}
{626001	319465}	{626501	302527}	{627001	312840}	{627501	316266}
{628001	313816}	{628501	318759}	{629001	308871}	{629501	319490}
{630001	307458}	{630501	312118}	{631001	309216}	{631501	307230}
{632001	309935}	{632501	311113}	{633001	326649}	{633501	320785}
{634001	314402}	{634501	316478}	{635001	320608}	{635501	309549}
{636001	321127}	{636501	319757}	{637001	313626}	{637501	314535}
{638001	320084}	{638501	315653}	{639001	318422}	{639501	320888}
{640001	318017}	{640501	321139}	{641001	319472}	{641501	318049}
{642001	322659}	{642501	322891}	{643001	321682}	{643501	327777}
{644001	317069}	{644501	331267}	{645001	324260}	{645501	316596}
{646001	315103}	{646501	322358}	{647001	317597}	{647501	328265}
{648001	331099}	{648501	326275}	{649001	331512}	{649501	332554}
{650001	327643}	{650501	323912}	{651001	322074}	{651501	322153}
{652001	324581}	{652501	318746}	{653001	322894}	{653501	326358}
{654001	321506}	{654501	331747}	{655001	325728}	{655501	321269}
{656001	331150}	{656501	337249}	{657001	327013}	{657501	333259}
{658001	309985}	{658501	328869}	{659001	321952}	{659501	322899}
{660001	323546}	{660501	323437}	{661001	327687}	{661501	321938}
{662001	324437}	{662501	330686}	{663001	337887}	{663501	334029}
{664001	339067}	{664501	335095}	{665001	330001}	{665501	339262}
{666001	337982}	{666501	333070}	{667001	334198}	{667501	330919}
{668001	333933}	{668501	332071}	{669001	332518}	{669501	335487}
{670001	337282}	{670501	334135}	{671001	336582}	{671501	344492}
{672001	338588}	{672501	329892}	{673001	330771}	{673501	338934}
{674001	340005}	{674501	341219}	{675001	336942}	{675501	333333}
{676001	343302}	{676501	332663}	{677001	338683}	{677501	331501}
{678001	333095}	{678501	341721}	{679001	338312}	{679501	342639}
{680001	330958}	{680501	344201}	{681001	342919}	{681501	343774}
{682001	343426}	{682501	332343}	{683001	336287}	{683501	339978}
{684001	346811}	{684501	340209}	{685001	342508}	{685501	341726}
{686001	347106}	{686501	343718}	{687001	346051}	{687501	345726}
{688001	339901}	{688501	337468}	{689001	347487}	{689501	345341}
{690001	346363}	{690501	338882}	{691001	347324}	{691501	345719}
{692001	348250}	{692501	346576}	{693001	351661}	{693501	344016}
{694001	349051}	{694501	339879}	{695001	349352}	{695501	347085}
{696001	348381}	{696501	343526}	{697001	345620}	{697501	352931}
{698001	349236}	{698501	351182}	{699001	349207}	{699501	348093}
{700001	345561}	{700501	347526}	{701001	351390}	{701501	348908}
{702001	355467}	{702501	353968}	{703001	352640}	{703501	349032}
{704001	347459}	{704501	350811}	{705001	354973}	{705501	345364}
{706001	351151}	{706501	353160}	{707001	355571}	{707501	355201}
{708001	357703}	{708501	353250}	{709001	351375}	{709501	356007}
{710001	354649}	{710501	356695}	{711001	353348}	{711501	356574}
{712001	353692}	{712501	356821}	{713001	359572}	{713501	358249}
{714001	355143}	{714501	357141}	{715001	358593}	{715501	355927}
{716001	358061}	{716501	359774}	{717001	359564}	{717501	357746}
{718001	356632}	{718501	361725}	{719001	357396}	{719501	362716}
{720001	357431}	{720501	358702}	{721001	362443}	{721501	358802}
{722001	362802}	{722501	362373}	{723001	360997}	{723501	360571}
{724001	365129}	{724501	363976}	{725001	363732}	{725501	361311}
{726001	365341}	{726501	360894}	{727001	363375}	{727501	364357}
{728001	365480}	{728501	364596}	{729001	366329}	{729501	363177}
{730001	364327}	{730501	364845}	{731001	364937}	{731501	365397}
{732001	368577}	{732501	365127}	{733001	369323}	{733501	367119}
{734001	366452}	{734501	366912}	{735001	366923}	{735501	367103}
{736001	369085}	{736501	372880}	{737001	368943}	{737501	366680}
{738001	366438}	{738501	371376}	{739001	369475}	{739501	368142}
{740001	371087}	{740501	372968}	{741001	371346}	{741501	369622}
{742001	369995}	{742501	371910}	{743001	370077}	{743501	371248}
{744001	371457}	{744501	372942}	{745001	371479}	{745501	373887}
{746001	371357}	{746501	372716}	{747001	375811}	{747501	372486}
{748001	375647}	{748501	371943}	{749001	373616}	{749501	373226}
{750001	376318}	{750501	375163}	{751001	372696}	{751501	375007}
{752001	377968}	{752501	375197}	{753001	376001}	{753501	377365}
{754001	376312}	{754501	375844}	{755001	375403}	{755501	376053}
{756001	381129}	{756501	375404}	{757001	374655}	{757501	384429}
{758001	379948}	{758501	370510}	{759001	376545}	{759501	381982}
{760001	384455}	{760501	382761}	{761001	376446}	{761501	386057}
{762001	373036}	{762501	381512}	{763001	387854}	{763501	379625}
{764001	381186}	{764501	374130}	{765001	379315}	{765501	381843}
{766001	382544}	{766501	387931}	{767001	365572}	{767501	382426}
{768001	387259}	{768501	387366}	{769001	384976}	{769501	383082}
{770001	382958}	{770501	380384}	{771001	374913}	{771501	377548}
{772001	383662}	{772501	382947}	{773001	377560}	{773501	379756}
{774001	383230}	{774501	386405}	{775001	384374}	{775501	385233}
{776001	382736}	{776501	391514}	{777001	392494}	{777501	382096}
{778001	384011}	{778501	383422}	{779001	394295}	{779501	391483}
{780001	383443}	{780501	398983}	{781001	413283}	{781501	399588}
{782001	391491}	{782501	400126}	{783001	391616}	{783501	393170}
{784001	384187}	{784501	394029}	{785001	387454}	{785501	397398}
{786001	385481}	{786501	389257}	{787001	388176}	{787501	398232}
{788001	385411}	{788501	381907}	{789001	392746}	{789501	408466}
{790001	382787}	{790501	390523}	{791001	391006}	{791501	404818}
{792001	394625}	{792501	403197}	{793001	394799}	{793501	407773}
{794001	406829}	{794501	388797}	{795001	407813}	{795501	389824}
{796001	384538}	{796501	397665}	{797001	384627}	{797501	392151}
{798001	408379}	{798501	403451}	{799001	396013}	{799501	412759}
{800001	396371}	{800501	398853}	{801001	400868}	{801501	409525}
{802001	387945}	{802501	395211}	{803001	395817}	{803501	396766}
{804001	416828}	{804501	407831}	{805001	407761}	{805501	399804}
{806001	400386}	{806501	406217}	{807001	403327}	{807501	386403}
{808001	402756}	{808501	402080}	{809001	421582}	{809501	420423}
{810001	399915}	{810501	407694}	{811001	404140}	{811501	400881}
{812001	433949}	{812501	401705}	{813001	417634}	{813501	402617}
{814001	420818}	{814501	416379}	{815001	413922}	{815501	407996}
{816001	414694}	{816501	423239}	{817001	408992}	{817501	407227}
{818001	396791}	{818501	428933}	{819001	404517}	{819501	416209}
{820001	415128}	{820501	428653}	{821001	413254}	{821501	416278}
{822001	404936}	{822501	398840}	{823001	415636}	{823501	397768}
{824001	411394}	{824501	405667}	{825001	398764}	{825501	415131}
{826001	433816}	{826501	400037}	{827001	396737}	{827501	417373}
{828001	409169}	{828501	413772}	{829001	409244}	{829501	427533}
{830001	427542}	{830501	409793}	{831001	418524}	{831501	412431}
{832001	422432}	{832501	415112}	{833001	407293}	{833501	439236}
{834001	396666}	{834501	411146}	{835001	410758}	{835501	416625}
{836001	418201}	{836501	400532}	{837001	422567}	{837501	403549}
{838001	409030}	{838501	410187}	{839001	420266}	{839501	413702}
{840001	421866}	{840501	429362}	{841001	424214}	{841501	411388}
{842001	430713}	{842501	421804}	{843001	424746}	{843501	439398}
{844001	413110}	{844501	424856}	{845001	430747}	{845501	428275}
{846001	441109}	{846501	414134}	{847001	420292}	{847501	411883}
{848001	431995}	{848501	414234}	{849001	436940}	{849501	426278}
{850001	427401}	{850501	419763}	{851001	406138}	{851501	414417}
{852001	425518}	{852501	418365}	{853001	414354}	{853501	423426}
{854001	438360}	{854501	423539}	{855001	428423}	{855501	418631}
{856001	434201}	{856501	429090}	{857001	426224}	{857501	447284}
{858001	425842}	{858501	425614}	{859001	424508}	{859501	437554}
{860001	424368}	{860501	418696}	{861001	414746}	{861501	431810}
{862001	428476}	{862501	443260}	{863001	439461}	{863501	443998}
{864001	426080}	{864501	437753}	{865001	439995}	{865501	423919}
{866001	436028}	{866501	437062}	{867001	436624}	{867501	446155}
{868001	417174}	{868501	435477}	{869001	438318}	{869501	445861}
{870001	471214}	{870501	436554}	{871001	419340}	{871501	439881}
{872001	418530}	{872501	436957}	{873001	458787}	{873501	410552}
{874001	442721}	{874501	455790}	{875001	432223}	{875501	439893}
{876001	438414}	{876501	413171}	{877001	450662}	{877501	443959}
{878001	453790}	{878501	442197}	{879001	427928}	{879501	446399}
{880001	444558}	{880501	450096}	{881001	443315}	{881501	451277}
{882001	431333}	{882501	426941}	{883001	421614}	{883501	431027}
{884001	436310}	{884501	433209}	{885001	424956}	{885501	450795}
{886001	438716}	{886501	426016}	{887001	442487}	{887501	434320}
{888001	433906}	{888501	440326}	{889001	446679}	{889501	438807}
{890001	431447}	{890501	422285}	{891001	447687}	{891501	447326}
{892001	453059}	{892501	475957}	{893001	451514}	{893501	441186}
{894001	460110}	{894501	439241}	{895001	457477}	{895501	435795}
{896001	438208}	{896501	455034}	{897001	453858}	{897501	459344}
{898001	446947}	{898501	447151}	{899001	453441}	{899501	447098}
{900001	456817}	{900501	428894}	{901001	439140}	{901501	463321}
{902001	448123}	{902501	459922}	{903001	424957}	{903501	478807}
{904001	435539}	{904501	460264}	{905001	460083}	{905501	453376}
{906001	454699}	{906501	450407}	{907001	428548}	{907501	452725}
{908001	459956}	{908501	461334}	{909001	456231}	{909501	415190}
{910001	450468}	{910501	450623}	{911001	462737}	{911501	465510}
{912001	459920}	{912501	450284}	{913001	456786}	{913501	449668}
{914001	456556}	{914501	469421}	{915001	472606}	{915501	473478}
{916001	444219}	{916501	459029}	{917001	447562}	{917501	448587}
{918001	458652}	{918501	447939}	{919001	443214}	{919501	448145}
{920001	443191}	{920501	446379}	{921001	463242}	{921501	484253}
{922001	474384}	{922501	458385}	{923001	463305}	{923501	441157}
{924001	482552}	{924501	452201}	{925001	438699}	{925501	444616}
{926001	450045}	{926501	445506}	{927001	447920}	{927501	464602}
{928001	473082}	{928501	470823}	{929001	464208}	{929501	470202}
{930001	477707}	{930501	480824}	{931001	443327}	{931501	473467}
{932001	490068}	{932501	470507}	{933001	458121}	{933501	475119}
{934001	461978}	{934501	465849}	{935001	468604}	{935501	481658}
{936001	460129}	{936501	489988}	{937001	461093}	{937501	473939}
{938001	452203}	{938501	450417}	{939001	464524}	{939501	490821}
{940001	462101}	{940501	476664}	{941001	451868}	{941501	465348}
{942001	474185}	{942501	482300}	{943001	464410}	{943501	445536}
{944001	464944}	{944501	463167}	{945001	464894}	{945501	485885}
{946001	474488}	{946501	481812}	{947001	484603}	{947501	462443}
{948001	487131}	{948501	479218}	{949001	472042}	{949501	464689}
{950001	462109}	{950501	479229}	{951001	477125}	{951501	461988}
{952001	460495}	{952501	450025}	{953001	459904}	{953501	473711}
{954001	459183}	{954501	469585}	{955001	508343}	{955501	509498}
{956001	460533}	{956501	488058}	{957001	482561}	{957501	478262}
{958001	503381}	{958501	464344}	{959001	465020}	{959501	482865}
{960001	482603}	{960501	470920}	{961001	501136}	{961501	482687}
{962001	496429}	{962501	475169}	{963001	496214}	{963501	479947}
{964001	497803}	{964501	480600}	{965001	473488}	{965501	470503}
{966001	497928}	{966501	492482}	{967001	492466}	{967501	504546}
{968001	472483}	{968501	461279}	{969001	500666}	{969501	497667}
{970001	467682}	{970501	517724}	{971001	485408}	{971501	501432}
{972001	484152}	{972501	482546}	{973001	479865}	{973501	491152}
{974001	481104}	{974501	501421}	{975001	475820}	{975501	506497}
{976001	485518}	{976501	480343}	{977001	498969}	{977501	478921}
{978001	466518}	{978501	486832}	{979001	480922}	{979501	468342}
{980001	484743}	{980501	494310}	{981001	507969}	{981501	486785}
{982001	482890}	{982501	463109}	{983001	495148}	{983501	499485}
{984001	509622}	{984501	490523}	{985001	510855}	{985501	475382}
{986001	485081}	{986501	504372}	{987001	492720}	{987501	507063}
{988001	486028}	{988501	475037}	{989001	481536}	{989501	492957}
{990001	488593}	{990501	481027}	{991001	483719}	{991501	510367}
{992001	489289}	{992501	460844}	{993001	511814}	{993501	498771}
{994001	486770}	{994501	458726}	{995001	475138}	{995501	511528}
{996001	501292}	{996501	493924}	{997001	492112}	{997501	496662}
{998001	498543}	{998501	500301}	{999001	491529}	{999501	518641}
{1000001	489187}	{1000501	514539}	{1001001	526981}
{1001501	477605}	{1002001	491911}	{1002501	502686}
{1003001	507185}	{1003501	517911}	{1004001	511969}
{1004501	498267}	{1005001	484288}	{1005501	487660}
{1006001	501878}	{1006501	504347}	{1007001	511637}
{1007501	484516}	{1008001	492252}	{1008501	497154}
{1009001	498433}	{1009501	493287}	{1010001	518795}
{1010501	494443}	{1011001	525536}	{1011501	497086}
{1012001	494274}	{1012501	500705}	{1013001	512872}
{1013501	501448}	{1014001	480650}	{1014501	511219}
{1015001	504636}	{1015501	499389}	{1016001	501786}
{1016501	514024}	{1017001	528077}	{1017501	514292}
{1018001	517763}	{1018501	507209}	{1019001	522748}
{1019501	507041}	{1020001	503354}	{1020501	528919}
{1021001	500848}	{1021501	506446}	{1022001	502257}
{1022501	532693}	{1023001	513773}	{1023501	515838}
{1024001	508758}	{1024501	531609}	{1025001	536052}
{1025501	517475}	{1026001	518745}	{1026501	488705}
{1027001	525713}	{1027501	519412}	{1028001	530905}
{1028501	531471}	{1029001	516406}	{1029501	491549}
{1030001	523021}	{1030501	517341}	{1031001	514057}
{1031501	527213}	{1032001	523978}	{1032501	526522}
{1033001	504117}	{1033501	516145}	{1034001	533380}
{1034501	527578}	{1035001	500316}	{1035501	515692}
{1036001	535671}	{1036501	510188}	{1037001	516788}
{1037501	543736}	{1038001	513462}	{1038501	508889}
{1039001	513575}	{1039501	519654}	{1040001	512400}
{1040501	522550}	{1041001	510698}	{1041501	536751}
{1042001	513836}	{1042501	504838}	{1043001	527318}
{1043501	540719}	{1044001	516521}	{1044501	528020}
{1045001	529383}	{1045501	510268}	{1046001	525590}
{1046501	508134}	{1047001	517773}	{1047501	512883}
{1048001	540157}	{1048501	511861}	{1049001	515705}
{1049501	530722}	{1050001	529319}	{1050501	535499}
{1051001	529614}	{1051501	514013}	{1052001	524225}
{1052501	518444}	{1053001	521054}	{1053501	502014}
{1054001	532680}	{1054501	536952}	{1055001	552012}
{1055501	534741}	{1056001	534894}	{1056501	553707}
{1057001	528453}	{1057501	518776}	{1058001	541840}
{1058501	552822}	{1059001	529707}	{1059501	513112}
{1060001	531184}	{1060501	522691}	{1061001	506889}
{1061501	526053}	{1062001	529223}	{1062501	541034}
{1063001	527634}	{1063501	547663}	{1064001	542017}
{1064501	519414}	{1065001	511043}	{1065501	505260}
{1066001	540094}	{1066501	531255}	{1067001	521825}
{1067501	526256}	{1068001	543210}	{1068501	536200}
{1069001	537749}	{1069501	545187}	{1070001	527478}
{1070501	538244}	{1071001	533883}	{1071501	533388}
{1072001	543923}	{1072501	527566}	{1073001	551353}
{1073501	538043}	{1074001	559265}	{1074501	554232}
{1075001	543363}	{1075501	529511}	{1076001	546939}
{1076501	509256}	{1077001	553986}	{1077501	545234}
{1078001	549416}	{1078501	524122}	{1079001	534567}
{1079501	530692}	{1080001	536813}	{1080501	542727}
{1081001	527795}	{1081501	529625}	{1082001	541551}
{1082501	531579}	{1083001	552712}	{1083501	556565}
{1084001	524214}	{1084501	550846}	{1085001	550744}
{1085501	546619}	{1086001	561224}	{1086501	547006}
{1087001	516017}	{1087501	542468}	{1088001	543628}
{1088501	560765}	{1089001	570798}	{1089501	561880}
{1090001	538224}	{1090501	555763}	{1091001	557702}
{1091501	544055}	{1092001	554731}	{1092501	549808}
{1093001	557013}	{1093501	552100}	{1094001	540441}
{1094501	563782}	{1095001	551994}	{1095501	549980}
{1096001	539916}	{1096501	551952}	{1097001	522031}
{1097501	545210}	{1098001	551569}	{1098501	547761}
{1099001	561128}	{1099501	571560}	{1100001	575039}
{1100501	535222}	{1101001	556798}	{1101501	542775}
{1102001	531105}	{1102501	554520}	{1103001	542220}
{1103501	580223}	{1104001	541423}	{1104501	567127}
{1105001	569621}	{1105501	562951}	{1106001	543718}
{1106501	557960}	{1107001	552328}	{1107501	547720}
{1108001	555216}	{1108501	536461}	{1109001	558758}
{1109501	553789}	{1110001	562523}	{1110501	565780}
{1111001	554209}	{1111501	522825}	{1112001	545792}
{1112501	551672}	{1113001	538801}	{1113501	560581}
{1114001	579317}	{1114501	537475}	{1115001	568864}
{1115501	564629}	{1116001	552280}	{1116501	572637}
{1117001	560147}	{1117501	568651}	{1118001	537422}
{1118501	542758}	{1119001	566399}	{1119501	565320}
{1120001	575285}	{1120501	564489}	{1121001	579514}
{1121501	589293}	{1122001	566021}	{1122501	544999}
{1123001	556084}	{1123501	599038}	{1124001	546598}
{1124501	578776}	{1125001	557102}	{1125501	557401}
{1126001	539365}	{1126501	571295}	{1127001	567043}
{1127501	547074}	{1128001	555400}	{1128501	573230}
{1129001	567504}	{1129501	569793}	{1130001	559621}
{1130501	569602}	{1131001	585897}	{1131501	551452}
{1132001	558630}	{1132501	563727}	{1133001	562833}
{1133501	544942}	{1134001	568756}	{1134501	573599}
{1135001	569459}	{1135501	590667}	{1136001	581992}
{1136501	560716}	{1137001	574227}	{1137501	594480}
{1138001	568485}	{1138501	555697}	{1139001	560001}
{1139501	559283}	{1140001	583454}	{1140501	582649}
{1141001	595026}	{1141501	582137}	{1142001	564984}
{1142501	573499}	{1143001	596429}	{1143501	609337}
{1144001	564468}	{1144501	566233}	{1145001	581746}
{1145501	566075}	{1146001	559774}	{1146501	574163}
{1147001	544887}	{1147501	550365}	{1148001	566599}
{1148501	576171}	{1149001	583130}	{1149501	585490}
{1150001	597659}	{1150501	587060}	{1151001	585663}
{1151501	581319}	{1152001	574245}	{1152501	592894}
{1153001	570492}	{1153501	569134}	{1154001	590827}
{1154501	589900}	{1155001	558046}	{1155501	564496}
{1156001	577606}	{1156501	586944}	{1157001	580295}
{1157501	583661}	{1158001	576058}	{1158501	598036}
{1159001	571395}	{1159501	574443}	{1160001	596506}
{1160501	570144}	{1161001	591339}	{1161501	572479}
{1162001	574668}	{1162501	565193}	{1163001	573470}
{1163501	589685}	{1164001	581296}	{1164501	585419}
{1165001	578457}	{1165501	571765}	{1166001	565116}
{1166501	590040}	{1167001	565693}	{1167501	595128}
{1168001	575177}	{1168501	595083}	{1169001	597839}
{1169501	567074}	{1170001	579756}	{1170501	590913}
{1171001	585751}	{1171501	593324}	{1172001	595223}
{1172501	596064}	{1173001	606825}	{1173501	586962}
{1174001	594383}	{1174501	577723}	{1175001	581062}
{1175501	575709}	{1176001	580836}	{1176501	584911}
{1177001	596940}	{1177501	584917}	{1178001	559569}
{1178501	584289}	{1179001	574729}	{1179501	592337}
{1180001	601473}	{1180501	557033}	{1181001	578690}
{1181501	585217}	{1182001	602863}	{1182501	584193}
{1183001	590414}	{1183501	582021}	{1184001	608276}
{1184501	598654}	{1185001	599233}	{1185501	600567}
{1186001	604527}	{1186501	605591}	{1187001	586193}
{1187501	583806}	{1188001	605295}	{1188501	616858}
{1189001	589433}	{1189501	597637}	{1190001	625649}
{1190501	604306}	{1191001	601481}	{1191501	601102}
{1192001	589353}	{1192501	591658}	{1193001	591684}
{1193501	574895}	{1194001	595571}	{1194501	606090}
{1195001	605124}	{1195501	601228}	{1196001	614315}
{1196501	599880}	{1197001	609799}	{1197501	587014}
{1198001	611595}	{1198501	626900}	{1199001	601761}
{1199501	609972}	{1200001	599232}	{1200501	594146}
{1201001	600626}	{1201501	612753}	{1202001	601596}
{1202501	601732}	{1203001	589787}	{1203501	616752}
{1204001	618079}	{1204501	604837}	{1205001	588338}
{1205501	583807}	{1206001	614782}	{1206501	596112}
{1207001	617412}	{1207501	598179}	{1208001	585632}
{1208501	601076}	{1209001	593677}	{1209501	614024}
{1210001	609828}	{1210501	597929}	{1211001	616977}
{1211501	610861}	{1212001	607135}	{1212501	591696}
{1213001	593740}	{1213501	610555}	{1214001	629623}
{1214501	609299}	{1215001	589410}	{1215501	584919}
{1216001	602370}	{1216501	593717}	{1217001	608247}
{1217501	589428}	{1218001	611650}	{1218501	597789}
{1219001	617382}	{1219501	626542}	{1220001	611488}
{1220501	580409}	{1221001	601779}	{1221501	612710}
{1222001	618373}	{1222501	579863}	{1223001	620337}
{1223501	608567}	{1224001	615736}	{1224501	626684}
{1225001	602860}	{1225501	624213}	{1226001	624731}
{1226501	622643}	{1227001	619921}	{1227501	604257}
{1228001	616337}	{1228501	607922}	{1229001	603170}
{1229501	616257}	{1230001	618409}	{1230501	614431}
{1231001	614378}	{1231501	586229}	{1232001	627379}
{1232501	619584}	{1233001	618570}	{1233501	634605}
{1234001	618600}	{1234501	606654}	{1235001	619742}
{1235501	632211}	{1236001	622099}	{1236501	627572}
{1237001	619168}	{1237501	613233}	{1238001	610551}
{1238501	614713}	{1239001	614572}	{1239501	602190}
{1240001	603013}	{1240501	612523}	{1241001	618982}
{1241501	612648}	{1242001	613025}	{1242501	619655}
{1243001	609570}	{1243501	628874}	{1244001	619495}
{1244501	615758}	{1245001	618281}	{1245501	627723}
{1246001	629357}	{1246501	621121}	{1247001	614049}
{1247501	621886}	{1248001	625345}	{1248501	628724}
{1249001	604308}	{1249501	629489}	{1250001	627723}
{1250501	621510}	{1251001	614317}	{1251501	601143}
{1252001	632457}	{1252501	634905}	{1253001	628793}
{1253501	613228}	{1254001	620367}	{1254501	645382}
{1255001	632974}	{1255501	626593}	{1256001	632699}
{1256501	624191}	{1257001	633747}	{1257501	617543}
{1258001	630488}	{1258501	641720}	{1259001	603775}
{1259501	625604}	{1260001	634140}	{1260501	621825}
{1261001	638518}	{1261501	641659}	{1262001	632879}
{1262501	624293}	{1263001	646537}	{1263501	632640}
{1264001	614366}	{1264501	617613}	{1265001	621875}
{1265501	645062}	{1266001	623770}	{1266501	625620}
{1267001	640039}	{1267501	622349}	{1268001	637760}
{1268501	643428}	{1269001	644483}	{1269501	630371}
{1270001	640965}	{1270501	651086}	{1271001	640673}
{1271501	619433}	{1272001	633296}	{1272501	639272}
{1273001	636979}	{1273501	647706}	{1274001	619759}
{1274501	632804}	{1275001	631112}	{1275501	650660}
{1276001	631792}	{1276501	622298}	{1277001	643255}
{1277501	654009}	{1278001	662850}	{1278501	660926}
{1279001	627430}	{1279501	618638}	{1280001	632867}
{1280501	649769}	{1281001	632043}	{1281501	655351}
{1282001	633047}	{1282501	644520}	{1283001	642025}
{1283501	650042}	{1284001	637125}	{1284501	635647}
{1285001	634574}	{1285501	648188}	{1286001	636251}
{1286501	651157}	{1287001	665722}	{1287501	630476}
{1288001	627996}	{1288501	638207}	{1289001	649259}
{1289501	650967}	{1290001	644672}	{1290501	645883}
{1291001	649221}	{1291501	648200}	{1292001	640397}
{1292501	649848}	{1293001	655057}	{1293501	653666}
{1294001	655658}	{1294501	640527}	{1295001	642834}
{1295501	651519}	{1296001	645559}	{1296501	651929}
{1297001	653877}	{1297501	633637}	{1298001	637324}
{1298501	671894}	{1299001	635842}	{1299501	659048}
{1300001	661854}	{1300501	656619}	{1301001	651515}
{1301501	641091}	{1302001	654221}	{1302501	644692}
{1303001	672958}	{1303501	649950}	{1304001	644185}
{1304501	664944}	{1305001	649963}	{1305501	671875}
{1306001	653873}	{1306501	651506}	{1307001	658370}
{1307501	646739}	{1308001	632126}	{1308501	660628}
{1309001	669702}	{1309501	657705}	{1310001	659139}
{1310501	650628}	{1311001	644968}	{1311501	637628}
{1312001	645108}	{1312501	663220}	{1313001	648716}
{1313501	675598}	{1314001	664562}	{1314501	662714}
{1315001	676488}	{1315501	662871}	{1316001	659306}
{1316501	651086}	{1317001	668127}	{1317501	653308}
{1318001	658357}	{1318501	656731}	{1319001	661739}
{1319501	650869}	{1320001	657144}	{1320501	648004}
{1321001	651579}	{1321501	655329}	{1322001	664010}
{1322501	659835}	{1323001	676130}	{1323501	665103}
{1324001	666996}	{1324501	672231}	{1325001	652036}
{1325501	663518}	{1326001	666810}	{1326501	644663}
{1327001	660691}	{1327501	646283}	{1328001	639878}
{1328501	659397}	{1329001	665484}	{1329501	672370}
{1330001	664544}	{1330501	674553}	{1331001	668225}
{1331501	662465}	{1332001	668147}	{1332501	659498}
{1333001	681333}	{1333501	664988}	{1334001	669270}
{1334501	645266}	{1335001	666684}	{1335501	674479}
{1336001	670914}	{1336501	660025}	{1337001	668612}
{1337501	681939}	{1338001	662533}	{1338501	678475}
{1339001	658294}	{1339501	665952}	{1340001	670966}
{1340501	669335}	{1341001	681510}	{1341501	675318}
{1342001	673585}	{1342501	669341}	{1343001	673777}
{1343501	674535}	{1344001	673315}	{1344501	687437}
{1345001	658829}	{1345501	669980}	{1346001	664488}
{1346501	673666}	{1347001	673417}	{1347501	662630}
{1348001	680882}	{1348501	677048}	{1349001	666444}
{1349501	660360}	{1350001	671369}	{1350501	663362}
{1351001	678645}	{1351501	687641}	{1352001	681262}
{1352501	662219}	{1353001	685140}	{1353501	672940}
{1354001	679212}	{1354501	668475}	{1355001	681139}
{1355501	682437}	{1356001	681600}	{1356501	673252}
{1357001	690362}	{1357501	677597}	{1358001	690818}
{1358501	670435}	{1359001	671830}	{1359501	670463}
{1360001	695390}	{1360501	701295}	{1361001	684430}
{1361501	686271}	{1362001	668723}	{1362501	666208}
{1363001	681964}	{1363501	684084}	{1364001	681719}
{1364501	689772}	{1365001	691333}	{1365501	683927}
{1366001	690914}	{1366501	687027}	{1367001	686329}
{1367501	673699}	{1368001	688113}	{1368501	679784}
{1369001	678280}	{1369501	685055}	{1370001	677018}
{1370501	683155}	{1371001	680602}	{1371501	699480}
{1372001	689834}	{1372501	686538}	{1373001	688375}
{1373501	684247}	{1374001	686425}	{1374501	685640}
{1375001	688094}	{1375501	689233}	{1376001	698178}
{1376501	687283}	{1377001	686683}	{1377501	690059}
{1378001	692817}	{1378501	690238}	{1379001	690505}
{1379501	700101}	{1380001	683855}	{1380501	688477}
{1381001	682934}	{1381501	683250}	{1382001	692483}
{1382501	681833}	{1383001	683829}	{1383501	696549}
{1384001	695562}	{1384501	685333}	{1385001	686771}
{1385501	691410}	{1386001	696499}	{1386501	691081}
{1387001	702019}	{1387501	690221}	{1388001	697846}
{1388501	700944}	{1389001	693696}	{1389501	694782}
{1390001	697680}	{1390501	687467}	{1391001	696560}
{1391501	700053}	{1392001	695153}	{1392501	705566}
{1393001	693868}	{1393501	698684}	{1394001	693397}
{1394501	700912}	{1395001	699382}	{1395501	707240}
{1396001	687524}	{1396501	692135}	{1397001	702262}
{1397501	702033}	{1398001	696585}	{1398501	708262}
{1399001	700917}	{1399501	697474}}
