# Supplementary material for: On Some Properties of the Hofstadter–Mertens Function
Source: Hindawi journal article supplement (doi:10.1155/2020/1816756), 2020-09-15
Supplement: f1 [file 1816756.f1.zip › Figure2.dat]

    {{1, 0}, {501, 11}, {1001, -23}, {1501, 71}, {2001, -28}, 
     {2501, 116}, {3001, 127}, {3501, 290}, {4001, 3}, {4501, 42}, 
     {5001, 175}, {5501, 199}, {6001, 258}, {6501, 153}, {7001, 73}, 
     {7501, -37}, {8001, -19}, {8501, 367}, {9001, 146}, {9501, 138}, 
     {10001, 310}, {10501, 350}, {11001, 470}, {11501, 462}, {12001, 497}, 
     {12501, 753}, {13001, -216}, {13501, 276}, {14001, 256}, {14501, 609}, 
     {15001, 445}, {15501, 61}, {16001, -7}, {16501, 523}, {17001, 470}, 
     {17501, 853}, {18001, -134}, {18501, 612}, {19001, 667}, {19501, 975}, 
     {20001, 831}, {20501, 905}, {21001, 861}, {21501, 782}, {22001, 784}, 
     {22501, 901}, {23001, 774}, {23501, 932}, {24001, 943}, {24501, 1447}, 
     {25001, 633}, {25501, 676}, {26001, 663}, {26501, 1508}, {27001, 1156}, 
     {27501, 300}, {28001, 2101}, {28501, 126}, {29001, 1534}, {29501, 760}, 
     {30001, 152}, {30501, 571}, {31001, 1278}, {31501, 419}, {32001, -101}, 
     {32501, 18}, {33001, -1473}, {33501, 125}, {34001, -836}, {34501, 89}, 
     {35001, 1449}, {35501, 989}, {36001, 1947}, {36501, 701}, {37001, -79}, 
     {37501, 1397}, {38001, 968}, {38501, 1816}, {39001, 2242}, 
     {39501, 1484}, {40001, 1269}, {40501, 2133}, {41001, 1961}, 
     {41501, 1698}, {42001, 1569}, {42501, 1998}, {43001, 1487}, 
     {43501, 1613}, {44001, 1697}, {44501, 1656}, {45001, 1813}, 
     {45501, 1733}, {46001, 1760}, {46501, 1746}, {47001, 1840}, 
     {47501, 2071}, {48001, 1874}, {48501, 1192}, {49001, 2332}, 
     {49501, 2470}, {50001, 509}, {50501, 1334}, {51001, -429}, 
     {51501, 1682}, {52001, 3905}, {52501, -50}, {53001, 1501}, 
     {53501, 2191}, {54001, 1331}, {54501, 2308}, {55001, 1761}, 
     {55501, 1426}, {56001, 1150}, {56501, 2614}, {57001, 1814}, 
     {57501, 1027}, {58001, 1726}, {58501, 416}, {59001, 942}, {59501, 1844}, 
     {60001, 1605}, {60501, -747}, {61001, 1403}, {61501, 1236}, 
     {62001, -820}, {62501, 584}, {63001, 317}, {63501, 375}, {64001, 434}, 
     {64501, -169}, {65001, -851}, {65501, -2312}, {66001, -1173}, 
     {66501, 649}, {67001, 752}, {67501, -320}, {68001, -517}, {68501, 1135}, 
     {69001, 124}, {69501, -593}, {70001, -1026}, {70501, 1180}, 
     {71001, 3020}, {71501, 3629}, {72001, 3183}, {72501, 2729}, 
     {73001, 3191}, {73501, 2468}, {74001, 2221}, {74501, 880}, 
     {75001, 2355}, {75501, 1402}, {76001, 1747}, {76501, 1798}, 
     {77001, 421}, {77501, 1493}, {78001, 2100}, {78501, 3777}, 
     {79001, 3849}, {79501, 1872}, {80001, 3375}, {80501, 3100}, 
     {81001, 1611}, {81501, 2544}, {82001, 2003}, {82501, 2260}, 
     {83001, 3046}, {83501, 1197}, {84001, 2282}, {84501, 3365}, 
     {85001, 3437}, {85501, 4111}, {86001, 3522}, {86501, 3118}, 
     {87001, 2608}, {87501, 3556}, {88001, 3310}, {88501, 3063}, 
     {89001, 3388}, {89501, 2882}, {90001, 2815}, {90501, 3538}, 
     {91001, 3677}, {91501, 3213}, {92001, 3182}, {92501, 3543}, 
     {93001, 3398}, {93501, 3388}, {94001, 3395}, {94501, 3631}, 
     {95001, 3400}, {95501, 3742}, {96001, 4048}, {96501, 2572}, 
     {97001, 2606}, {97501, 5463}, {98001, 4747}, {98501, 4958}, 
     {99001, 1838}, {99501, 3687}, {100001, 34}, {100501, 2909}, 
     {101001, 2159}, {101501, 5450}, {102001, 4564}, {102501, 3895}, 
     {103001, 4390}, {103501, 470}, {104001, 2038}, {104501, 4241}, 
     {105001, -96}, {105501, 3325}, {106001, 3688}, {106501, 2969}, 
     {107001, 3870}, {107501, 3196}, {108001, 2698}, {108501, 6057}, 
     {109001, 3735}, {109501, 6200}, {110001, 2637}, {110501, -1497}, 
     {111001, 3466}, {111501, 2847}, {112001, 2653}, {112501, 413}, 
     {113001, 3445}, {113501, 551}, {114001, 2997}, {114501, 7084}, 
     {115001, 593}, {115501, 4428}, {116001, 4195}, {116501, 653}, 
     {117001, 4603}, {117501, 4679}, {118001, 2775}, {118501, 2833}, 
     {119001, 858}, {119501, 2521}, {120001, 749}, {120501, 1369}, 
     {121001, 4716}, {121501, 6018}, {122001, -1580}, {122501, 1380}, 
     {123001, 856}, {123501, 1528}, {124001, -515}, {124501, 420}, 
     {125001, 4105}, {125501, -1287}, {126001, 2657}, {126501, 1506}, 
     {127001, 1871}, {127501, 1398}, {128001, -189}, {128501, 3683}, 
     {129001, 2936}, {129501, -467}, {130001, -158}, {130501, -3328}, 
     {131001, 1384}, {131501, 1874}, {132001, -396}, {132501, 3129}, 
     {133001, -1732}, {133501, 2654}, {134001, 299}, {134501, 2228}, 
     {135001, 1201}, {135501, 2677}, {136001, -3291}, {136501, 1408}, 
     {137001, 5005}, {137501, 4137}, {138001, 2671}, {138501, -601}, 
     {139001, 4689}, {139501, 1687}, {140001, -3510}, {140501, 4963}, 
     {141001, 721}, {141501, 1688}, {142001, -454}, {142501, 1696}, 
     {143001, 2218}, {143501, 1625}, {144001, 2505}, {144501, 4465}, 
     {145001, 1818}, {145501, 6547}, {146001, 2537}, {146501, 6044}, 
     {147001, -324}, {147501, 1539}, {148001, 5987}, {148501, 2065}, 
     {149001, 1409}, {149501, 4727}, {150001, 4120}, {150501, 3033}, 
     {151001, 3334}, {151501, 4851}, {152001, 1832}, {152501, 6176}, 
     {153001, 950}, {153501, 4060}, {154001, 4430}, {154501, 3333}, 
     {155001, 3963}, {155501, 5786}, {156001, 6528}, {156501, 4248}, 
     {157001, 3280}, {157501, 6041}, {158001, 5026}, {158501, 4682}, 
     {159001, 5195}, {159501, 5079}, {160001, 6086}, {160501, 5980}, 
     {161001, 4003}, {161501, 2814}, {162001, 4940}, {162501, 6952}, 
     {163001, 6802}, {163501, 7052}, {164001, 5780}, {164501, 4886}, 
     {165001, 4752}, {165501, 5324}, {166001, 4895}, {166501, 2634}, 
     {167001, 6137}, {167501, 4948}, {168001, 7376}, {168501, 7493}, 
     {169001, 7030}, {169501, 4458}, {170001, 7334}, {170501, 7517}, 
     {171001, 6671}, {171501, 5056}, {172001, 3823}, {172501, 5152}, 
     {173001, 6004}, {173501, 5445}, {174001, 5462}, {174501, 5933}, 
     {175001, 4220}, {175501, 6078}, {176001, 6684}, {176501, 6043}, 
     {177001, 5911}, {177501, 5907}, {178001, 5877}, {178501, 6344}, 
     {179001, 6272}, {179501, 5576}, {180001, 6590}, {180501, 5930}, 
     {181001, 7331}, {181501, 7100}, {182001, 6881}, {182501, 6350}, 
     {183001, 6986}, {183501, 5497}, {184001, 6287}, {184501, 6672}, 
     {185001, 6034}, {185501, 6241}, {186001, 6466}, {186501, 6678}, 
     {187001, 6856}, {187501, 6329}, {188001, 6530}, {188501, 6881}, 
     {189001, 7096}, {189501, 6170}, {190001, 6341}, {190501, 5881}, 
     {191001, 7930}, {191501, 5627}, {192001, 7053}, {192501, 7561}, 
     {193001, 3707}, {193501, 5888}, {194001, 5986}, {194501, 1821}, 
     {195001, 4546}, {195501, 8201}, {196001, 9963}, {196501, 9358}, 
     {197001, 6220}, {197501, 6407}, {198001, 5204}, {198501, 8313}, 
     {199001, 6057}, {199501, 5079}, {200001, 4789}, {200501, 9846}, 
     {201001, 7134}, {201501, 4915}, {202001, 7504}, {202501, 3787}, 
     {203001, 13414}, {203501, 7314}, {204001, 10346}, {204501, 3646}, 
     {205001, 514}, {205501, 6895}, {206001, 2087}, {206501, 6531}, 
     {207001, 11537}, {207501, 7811}, {208001, 10240}, {208501, 6421}, 
     {209001, 9332}, {209501, 4425}, {210001, 4870}, {210501, 9163}, 
     {211001, 11253}, {211501, 2908}, {212001, 4784}, {212501, 4202}, 
     {213001, 8251}, {213501, 8913}, {214001, 2124}, {214501, 2515}, 
     {215001, 6031}, {215501, 2253}, {216001, 8707}, {216501, 8180}, 
     {217001, 2202}, {217501, 3895}, {218001, -2829}, {218501, 524}, 
     {219001, 8266}, {219501, 7679}, {220001, 5306}, {220501, 6338}, 
     {221001, 10892}, {221501, 12574}, {222001, 479}, {222501, -58}, 
     {223001, 5613}, {223501, 4890}, {224001, 1301}, {224501, 4506}, 
     {225001, 6620}, {225501, 1031}, {226001, 10250}, {226501, -4353}, 
     {227001, 3570}, {227501, 6419}, {228001, 6141}, {228501, 7296}, 
     {229001, 335}, {229501, 4627}, {230001, 1384}, {230501, 4324}, 
     {231001, 6921}, {231501, 7917}, {232001, 3674}, {232501, 7786}, 
     {233001, 5641}, {233501, 3191}, {234001, 7252}, {234501, -1459}, 
     {235001, 3671}, {235501, 37}, {236001, 3997}, {236501, -650}, 
     {237001, 8563}, {237501, -1900}, {238001, 5827}, {238501, 5927}, 
     {239001, 2710}, {239501, 8892}, {240001, 9825}, {240501, 1058}, 
     {241001, 6769}, {241501, 4241}, {242001, 3692}, {242501, 1203}, 
     {243001, 11631}, {243501, -2877}, {244001, 7510}, {244501, 5716}, 
     {245001, 4904}, {245501, 1003}, {246001, -2145}, {246501, 1520}, 
     {247001, 333}, {247501, 3159}, {248001, 5213}, {248501, 3403}, 
     {249001, 1258}, {249501, 2606}, {250001, 6357}, {250501, -2020}, 
     {251001, 1865}, {251501, -1117}, {252001, 6039}, {252501, -3646}, 
     {253001, 496}, {253501, 760}, {254001, -4928}, {254501, -2596}, 
     {255001, -1201}, {255501, -8421}, {256001, -5754}, {256501, 3867}, 
     {257001, 2317}, {257501, 5919}, {258001, 5993}, {258501, 5601}, 
     {259001, 3307}, {259501, -393}, {260001, 7545}, {260501, -252}, 
     {261001, 2059}, {261501, 4063}, {262001, 2327}, {262501, -2524}, 
     {263001, 3783}, {263501, 7052}, {264001, -3833}, {264501, -6145}, 
     {265001, 4437}, {265501, 6315}, {266001, -2653}, {266501, 2032}, 
     {267001, -353}, {267501, 3763}, {268001, 1226}, {268501, -1145}, 
     {269001, 2631}, {269501, 1504}, {270001, 7129}, {270501, 2466}, 
     {271001, -3826}, {271501, 6572}, {272001, 5416}, {272501, -1096}, 
     {273001, 4362}, {273501, 6249}, {274001, 5040}, {274501, -849}, 
     {275001, 1935}, {275501, 3247}, {276001, 1274}, {276501, -1528}, 
     {277001, 5923}, {277501, 9845}, {278001, 8605}, {278501, 997}, 
     {279001, 9459}, {279501, 7367}, {280001, -3067}, {280501, 5417}, 
     {281001, 2865}, {281501, 5840}, {282001, -1973}, {282501, 7307}, 
     {283001, 7156}, {283501, 8153}, {284001, 4584}, {284501, 8238}, 
     {285001, 6129}, {285501, 6192}, {286001, 5419}, {286501, 7097}, 
     {287001, 1683}, {287501, 1398}, {288001, 12804}, {288501, 8381}, 
     {289001, 11277}, {289501, 5506}, {290001, 2230}, {290501, 8338}, 
     {291001, 7555}, {291501, 7472}, {292001, 5753}, {292501, 4785}, 
     {293001, 8373}, {293501, 4987}, {294001, 4530}, {294501, 9781}, 
     {295001, 3214}, {295501, 2655}, {296001, 7848}, {296501, 9491}, 
     {297001, 9697}, {297501, 8876}, {298001, 7043}, {298501, 7924}, 
     {299001, 7857}, {299501, 6609}, {300001, 8159}, {300501, 5998}, 
     {301001, 4160}, {301501, 10535}, {302001, 9079}, {302501, 5739}, 
     {303001, 9254}, {303501, 4559}, {304001, 7847}, {304501, 10153}, 
     {305001, 14046}, {305501, 12937}, {306001, 11986}, {306501, 6687}, 
     {307001, 8766}, {307501, 11400}, {308001, 6540}, {308501, 10081}, 
     {309001, 8991}, {309501, 10907}, {310001, 11074}, {310501, 9596}, 
     {311001, 16415}, {311501, 8920}, {312001, 7422}, {312501, 10993}, 
     {313001, 7511}, {313501, 8099}, {314001, 9624}, {314501, 9959}, 
     {315001, 12595}, {315501, 7616}, {316001, 4539}, {316501, 13250}, 
     {317001, 9488}, {317501, 10863}, {318001, 7828}, {318501, 10281}, 
     {319001, 10466}, {319501, 11223}, {320001, 14925}, {320501, 9197}, 
     {321001, 12723}, {321501, 14135}, {322001, 7048}, {322501, 7207}, 
     {323001, 13202}, {323501, 6469}, {324001, 10180}, {324501, 10289}, 
     {325001, 8980}, {325501, 14001}, {326001, 8625}, {326501, 9893}, 
     {327001, 12692}, {327501, 12493}, {328001, 7413}, {328501, 8078}, 
     {329001, 13638}, {329501, 7317}, {330001, 10687}, {330501, 9854}, 
     {331001, 6059}, {331501, 13278}, {332001, 9627}, {332501, 8640}, 
     {333001, 8079}, {333501, 6255}, {334001, 13776}, {334501, 9333}, 
     {335001, 11583}, {335501, 9013}, {336001, 13379}, {336501, 10575}, 
     {337001, 8499}, {337501, 11701}, {338001, 18039}, {338501, 10675}, 
     {339001, 10817}, {339501, 10901}, {340001, 13794}, {340501, 12213}, 
     {341001, 12423}, {341501, 8897}, {342001, 10402}, {342501, 13440}, 
     {343001, 10298}, {343501, 11067}, {344001, 14962}, {344501, 10579}, 
     {345001, 13066}, {345501, 10154}, {346001, 13757}, {346501, 12654}, 
     {347001, 12663}, {347501, 11659}, {348001, 12338}, {348501, 9171}, 
     {349001, 12122}, {349501, 10089}, {350001, 14311}, {350501, 12839}, 
     {351001, 10871}, {351501, 12762}, {352001, 14792}, {352501, 14626}, 
     {353001, 12678}, {353501, 12662}, {354001, 10828}, {354501, 11158}, 
     {355001, 10215}, {355501, 12918}, {356001, 13622}, {356501, 10770}, 
     {357001, 10748}, {357501, 13478}, {358001, 13004}, {358501, 13215}, 
     {359001, 11620}, {359501, 12782}, {360001, 12510}, {360501, 12426}, 
     {361001, 9198}, {361501, 11165}, {362001, 12566}, {362501, 11613}, 
     {363001, 11340}, {363501, 12853}, {364001, 12594}, {364501, 11739}, 
     {365001, 12317}, {365501, 12360}, {366001, 10534}, {366501, 12081}, 
     {367001, 12358}, {367501, 11948}, {368001, 12073}, {368501, 12919}, 
     {369001, 11246}, {369501, 11842}, {370001, 11581}, {370501, 12325}, 
     {371001, 11257}, {371501, 14055}, {372001, 13548}, {372501, 11779}, 
     {373001, 13504}, {373501, 12059}, {374001, 10795}, {374501, 13177}, 
     {375001, 12758}, {375501, 11794}, {376001, 11728}, {376501, 13293}, 
     {377001, 13562}, {377501, 12853}, {378001, 13298}, {378501, 13970}, 
     {379001, 13358}, {379501, 12861}, {380001, 13673}, {380501, 14480}, 
     {381001, 14540}, {381501, 12696}, {382001, 12995}, {382501, 13844}, 
     {383001, 10148}, {383501, 13359}, {384001, 14706}, {384501, 17946}, 
     {385001, 13093}, {385501, 17434}, {386001, 18722}, {386501, 16257}, 
     {387001, 15908}, {387501, 17632}, {388001, 12092}, {388501, 11315}, 
     {389001, 11051}, {389501, 13357}, {390001, 3784}, {390501, 2893}, 
     {391001, 13150}, {391501, 11910}, {392001, 5625}, {392501, 15275}, 
     {393001, 14036}, {393501, 15628}, {394001, 8526}, {394501, 12761}, 
     {395001, 16698}, {395501, 13080}, {396001, 16599}, {396501, 12620}, 
     {397001, 12929}, {397501, 17752}, {398001, 20634}, {398501, 8237}, 
     {399001, 21626}, {399501, 13885}, {400001, 8832}, {400501, 12246}, 
     {401001, 11155}, {401501, 14160}, {402001, 15579}, {402501, 5977}, 
     {403001, 13037}, {403501, 15553}, {404001, 9821}, {404501, 14248}, 
     {405001, 5144}, {405501, 7518}, {406001, 3159}, {406501, 21083}, 
     {407001, 17323}, {407501, 25374}, {408001, 7287}, {408501, 17738}, 
     {409001, 11437}, {409501, 6917}, {410001, 14817}, {410501, 21055}, 
     {411001, 6291}, {411501, 14747}, {412001, 20189}, {412501, 5562}, 
     {413001, 1576}, {413501, 11592}, {414001, 10489}, {414501, 8322}, 
     {415001, 20950}, {415501, 13207}, {416001, 12368}, {416501, 12539}, 
     {417001, 15403}, {417501, 10744}, {418001, 12196}, {418501, 18011}, 
     {419001, 12330}, {419501, 13430}, {420001, 8788}, {420501, 20007}, 
     {421001, 12680}, {421501, 12054}, {422001, 5823}, {422501, 20659}, 
     {423001, 5438}, {423501, 13225}, {424001, 18335}, {424501, 10568}, 
     {425001, 14972}, {425501, 13828}, {426001, 22025}, {426501, 14029}, 
     {427001, 14433}, {427501, 1533}, {428001, 22419}, {428501, 8867}, 
     {429001, 8754}, {429501, 18748}, {430001, 13549}, {430501, 14229}, 
     {431001, 6484}, {431501, 11393}, {432001, 14427}, {432501, 12739}, 
     {433001, 12852}, {433501, 12921}, {434001, -989}, {434501, 14180}, 
     {435001, 26437}, {435501, 10590}, {436001, 8377}, {436501, 13978}, 
     {437001, 16713}, {437501, 15951}, {438001, 11444}, {438501, 16266}, 
     {439001, 16076}, {439501, -1441}, {440001, 12275}, {440501, 15568}, 
     {441001, 9422}, {441501, 20087}, {442001, 10823}, {442501, 5089}, 
     {443001, 22341}, {443501, 12554}, {444001, 16190}, {444501, 25781}, 
     {445001, 15464}, {445501, 6439}, {446001, 10399}, {446501, 13641}, 
     {447001, 12082}, {447501, 7264}, {448001, 14262}, {448501, 12527}, 
     {449001, 10312}, {449501, 7568}, {450001, -1500}, {450501, 11961}, 
     {451001, 20523}, {451501, 13154}, {452001, 9843}, {452501, 3501}, 
     {453001, -279}, {453501, 1551}, {454001, 11244}, {454501, -248}, 
     {455001, 26423}, {455501, 13858}, {456001, 2372}, {456501, 12119}, 
     {457001, 14048}, {457501, 11941}, {458001, 6393}, {458501, 9893}, 
     {459001, 16755}, {459501, 9809}, {460001, -1453}, {460501, 4388}, 
     {461001, 5849}, {461501, -348}, {462001, 12006}, {462501, 13780}, 
     {463001, 22002}, {463501, -2424}, {464001, 7358}, {464501, 6710}, 
     {465001, 313}, {465501, 9033}, {466001, 8749}, {466501, 10513}, 
     {467001, 17153}, {467501, 487}, {468001, 9757}, {468501, 15696}, 
     {469001, 4770}, {469501, 10196}, {470001, 16176}, {470501, 12593}, 
     {471001, 8327}, {471501, 11406}, {472001, 16078}, {472501, 4883}, 
     {473001, 11293}, {473501, 3432}, {474001, 15448}, {474501, 11840}, 
     {475001, 3953}, {475501, 374}, {476001, -2792}, {476501, 13422}, 
     {477001, 7804}, {477501, 3656}, {478001, 1418}, {478501, 10188}, 
     {479001, 10063}, {479501, -4702}, {480001, 3614}, {480501, 13959}, 
     {481001, 4008}, {481501, 26735}, {482001, 15815}, {482501, 9501}, 
     {483001, 22447}, {483501, -2092}, {484001, 2358}, {484501, 5923}, 
     {485001, 10192}, {485501, 8603}, {486001, -2653}, {486501, 1950}, 
     {487001, -701}, {487501, 15623}, {488001, -2230}, {488501, 8677}, 
     {489001, 5845}, {489501, 4106}, {490001, 4719}, {490501, 9642}, 
     {491001, 4107}, {491501, 19292}, {492001, 12309}, {492501, 1721}, 
     {493001, 7364}, {493501, -8574}, {494001, 13475}, {494501, 9290}, 
     {495001, 7803}, {495501, 3315}, {496001, 15887}, {496501, 6095}, 
     {497001, 19881}, {497501, 6513}, {498001, 15731}, {498501, 5191}, 
     {499001, 8818}, {499501, 12173}, {500001, -9250}, {500501, -1930}, 
     {501001, 13283}, {501501, 9202}, {502001, 1982}, {502501, 6288}, 
     {503001, 6487}, {503501, 2280}, {504001, 12852}, {504501, 6836}, 
     {505001, 4610}, {505501, 1317}, {506001, 14411}, {506501, 13563}, 
     {507001, 2911}, {507501, 9770}, {508001, -154}, {508501, 7433}, 
     {509001, 3317}, {509501, 2030}, {510001, 4714}, {510501, 3697}, 
     {511001, 5797}, {511501, 1466}, {512001, -7751}, {512501, 2805}, 
     {513001, -4600}, {513501, -6837}, {514001, 11661}, {514501, 3749}, 
     {515001, -2376}, {515501, 7925}, {516001, 3125}, {516501, 4824}, 
     {517001, -1170}, {517501, 6896}, {518001, -903}, {518501, -2557}, 
     {519001, 14749}, {519501, -13599}, {520001, 1552}, {520501, 2144}, 
     {521001, -7427}, {521501, 5081}, {522001, 726}, {522501, 7344}, 
     {523001, 6361}, {523501, -1764}, {524001, 2134}, {524501, -4495}, 
     {525001, -4578}, {525501, 3811}, {526001, 4644}, {526501, 5505}, 
     {527001, 9784}, {527501, 1143}, {528001, 5381}, {528501, -9552}, 
     {529001, -11025}, {529501, 3753}, {530001, -7058}, {530501, 6289}, 
     {531001, -10907}, {531501, 3002}, {532001, 5056}, {532501, -4114}, 
     {533001, -5556}, {533501, -5425}, {534001, -846}, {534501, -2585}, 
     {535001, 4303}, {535501, 7765}, {536001, 490}, {536501, 3541}, 
     {537001, -6250}, {537501, 8353}, {538001, 347}, {538501, 19000}, 
     {539001, 1212}, {539501, 3663}, {540001, 2574}, {540501, -2164}, 
     {541001, -2610}, {541501, 8366}, {542001, -2360}, {542501, -566}, 
     {543001, -1754}, {543501, 635}, {544001, 10762}, {544501, -154}, 
     {545001, 6502}, {545501, 3746}, {546001, 6084}, {546501, -20}, 
     {547001, 22792}, {547501, 3221}, {548001, -2071}, {548501, 19622}, 
     {549001, 15432}, {549501, 6091}, {550001, 7314}, {550501, 1583}, 
     {551001, 16449}, {551501, 13226}, {552001, 8471}, {552501, 9910}, 
     {553001, 5895}, {553501, -1474}, {554001, 8766}, {554501, -133}, 
     {555001, 18027}, {555501, 1453}, {556001, 14747}, {556501, 8308}, 
     {557001, 3657}, {557501, 5979}, {558001, 14546}, {558501, 9084}, 
     {559001, 7061}, {559501, 14493}, {560001, 14823}, {560501, 8274}, 
     {561001, 6811}, {561501, 5696}, {562001, 8141}, {562501, 18113}, 
     {563001, 12614}, {563501, 10365}, {564001, 16039}, {564501, 12101}, 
     {565001, 5267}, {565501, 301}, {566001, -4143}, {566501, 3940}, 
     {567001, 17668}, {567501, 13085}, {568001, 20433}, {568501, 4652}, 
     {569001, 4200}, {569501, 4578}, {570001, 11128}, {570501, 13746}, 
     {571001, 11912}, {571501, 15336}, {572001, 15064}, {572501, 17466}, 
     {573001, 19516}, {573501, 8577}, {574001, 16078}, {574501, 16303}, 
     {575001, 21747}, {575501, 5270}, {576001, 14819}, {576501, 16121}, 
     {577001, 32899}, {577501, 18946}, {578001, 20923}, {578501, 19159}, 
     {579001, 15348}, {579501, 15989}, {580001, 17041}, {580501, 13127}, 
     {581001, 16570}, {581501, 12781}, {582001, 12720}, {582501, 11034}, 
     {583001, 5715}, {583501, 19782}, {584001, 12059}, {584501, 8622}, 
     {585001, 4500}, {585501, 6861}, {586001, 23737}, {586501, 13783}, 
     {587001, 4776}, {587501, 14749}, {588001, 10203}, {588501, 14082}, 
     {589001, 13635}, {589501, 8893}, {590001, 15081}, {590501, 22989}, 
     {591001, 14708}, {591501, 12320}, {592001, 10880}, {592501, 8118}, 
     {593001, 21205}, {593501, 18307}, {594001, 15531}, {594501, 18600}, 
     {595001, 23698}, {595501, 18832}, {596001, 10487}, {596501, 11735}, 
     {597001, 10668}, {597501, 7001}, {598001, 7707}, {598501, 4921}, 
     {599001, 4055}, {599501, 11610}, {600001, 12914}, {600501, 11705}, 
     {601001, 23291}, {601501, 14821}, {602001, 21975}, {602501, 25298}, 
     {603001, 12441}, {603501, 12722}, {604001, 19922}, {604501, 4739}, 
     {605001, 15170}, {605501, 11530}, {606001, 15969}, {606501, 14374}, 
     {607001, 8343}, {607501, 15157}, {608001, 13888}, {608501, 14394}, 
     {609001, 21021}, {609501, 6027}, {610001, 22577}, {610501, 8934}, 
     {611001, 17579}, {611501, 11034}, {612001, 12427}, {612501, 13839}, 
     {613001, 15769}, {613501, 9919}, {614001, 14667}, {614501, 16476}, 
     {615001, 11208}, {615501, 18054}, {616001, 8175}, {616501, 16639}, 
     {617001, 17825}, {617501, 23776}, {618001, 10491}, {618501, 15154}, 
     {619001, 12527}, {619501, 18177}, {620001, 25281}, {620501, 21048}, 
     {621001, 22335}, {621501, 10187}, {622001, 11072}, {622501, 16690}, 
     {623001, 7575}, {623501, 21087}, {624001, 6191}, {624501, 4028}, 
     {625001, 20906}, {625501, 18441}, {626001, 10815}, {626501, 28096}, 
     {627001, 18116}, {627501, 15003}, {628001, 17741}, {628501, 13127}, 
     {629001, 23304}, {629501, 12982}, {630001, 25290}, {630501, 20896}, 
     {631001, 24068}, {631501, 26423}, {632001, 24059}, {632501, 23224}, 
     {633001, 8021}, {633501, 14198}, {634001, 20877}, {634501, 19144}, 
     {635001, 15348}, {635501, 26719}, {636001, 15431}, {636501, 17128}, 
     {637001, 23552}, {637501, 22936}, {638001, 17665}, {638501, 22362}, 
     {639001, 19856}, {639501, 17733}, {640001, 20938}, {640501, 18128}, 
     {641001, 20086}, {641501, 21834}, {642001, 17520}, {642501, 17580}, 
     {643001, 19066}, {643501, 13239}, {644001, 24203}, {644501, 10331}, 
     {645001, 17634}, {645501, 25589}, {646001, 27360}, {646501, 20373}, 
     {647001, 25382}, {647501, 15011}, {648001, 12446}, {648501, 17505}, 
     {649001, 12532}, {649501, 11712}, {650001, 16853}, {650501, 20851}, 
     {651001, 23055}, {651501, 23316}, {652001, 21223}, {652501, 27389}, 
     {653001, 23559}, {653501, 20397}, {654001, 25584}, {654501, 15675}, 
     {655001, 22011}, {655501, 26764}, {656001, 17206}, {656501, 11395}, 
     {657001, 21930}, {657501, 15962}, {658001, 39496}, {658501, 20886}, 
     {659001, 28139}, {659501, 27524}, {660001, 27193}, {660501, 27596}, 
     {661001, 23670}, {661501, 29706}, {662001, 27508}, {662501, 21536}, 
     {663001, 14595}, {663501, 18718}, {664001, 14005}, {664501, 18264}, 
     {665001, 23658}, {665501, 14674}, {666001, 16214}, {666501, 21384}, 
     {667001, 20544}, {667501, 24092}, {668001, 21305}, {668501, 23434}, 
     {669001, 23221}, {669501, 20474}, {670001, 18951}, {670501, 22431}, 
     {671001, 20317}, {671501, 12711}, {672001, 18923}, {672501, 27936}, 
     {673001, 27336}, {673501, 19482}, {674001, 18684}, {674501, 17725}, 
     {675001, 22283}, {675501, 26211}, {676001, 16519}, {676501, 27468}, 
     {677001, 21721}, {677501, 29158}, {678001, 27831}, {678501, 19483}, 
     {679001, 23157}, {679501, 19066}, {680001, 31018}, {680501, 18005}, 
     {681001, 19499}, {681501, 18926}, {682001, 19584}, {682501, 30945}, 
     {683001, 27310}, {683501, 23894}, {684001, 17308}, {684501, 24183}, 
     {685001, 22159}, {685501, 23214}, {686001, 18073}, {686501, 21723}, 
     {687001, 19620}, {687501, 20143}, {688001, 26251}, {688501, 28958}, 
     {689001, 19202}, {689501, 21594}, {690001, 20827}, {690501, 28532}, 
     {691001, 20285}, {691501, 22150}, {692001, 19850}, {692501, 21749}, 
     {693001, 16872}, {693501, 24713}, {694001, 19845}, {694501, 29376}, 
     {695001, 20245}, {695501, 22869}, {696001, 21906}, {696501, 27084}, 
     {697001, 25267}, {697501, 18309}, {698001, 22336}, {698501, 20713}, 
     {699001, 22967}, {699501, 24409}, {700001, 27254}, {700501, 25572}, 
     {701001, 22001}, {701501, 24755}, {702001, 18428}, {702501, 20271}, 
     {703001, 21933}, {703501, 25863}, {704001, 27717}, {704501, 24691}, 
     {705001, 20842}, {705501, 30733}, {706001, 25240}, {706501, 23503}, 
     {707001, 21325}, {707501, 22015}, {708001, 19826}, {708501, 24561}, 
     {709001, 26731}, {709501, 22370}, {710001, 23962}, {710501, 22215}, 
     {711001, 25835}, {711501, 22869}, {712001, 25993}, {712501, 23112}, 
     {713001, 20593}, {713501, 22097}, {714001, 25571}, {714501, 23904}, 
     {715001, 22772}, {715501, 25706}, {716001, 23904}, {716501, 22510}, 
     {717001, 23006}, {717501, 25111}, {718001, 26494}, {718501, 21624}, 
     {719001, 26283}, {719501, 21283}, {720001, 26853}, {720501, 25870}, 
     {721001, 22397}, {721501, 26262}, {722001, 22579}, {722501, 23278}, 
     {723001, 24905}, {723501, 25586}, {724001, 21271}, {724501, 22650}, 
     {725001, 23098}, {725501, 25849}, {726001, 22124}, {726501, 26863}, 
     {727001, 24655}, {727501, 23944}, {728001, 23062}, {728501, 24250}, 
     {729001, 22791}, {729501, 26189}, {730001, 25294}, {730501, 25010}, 
     {731001, 25145}, {731501, 24904}, {732001, 22025}, {732501, 25744}, 
     {733001, 21785}, {733501, 24251}, {734001, 25145}, {734501, 24912}, 
     {735001, 25127}, {735501, 25198}, {736001, 23443}, {736501, 19838}, 
     {737001, 23998}, {737501, 26450}, {738001, 26927}, {738501, 22326}, 
     {739001, 24560}, {739501, 26207}, {740001, 23555}, {740501, 22001}, 
     {741001, 23910}, {741501, 25934}, {742001, 25836}, {742501, 24183}, 
     {743001, 26279}, {743501, 25435}, {744001, 25514}, {744501, 24328}, 
     {745001, 26065}, {745501, 23920}, {746001, 26707}, {746501, 25635}, 
     {747001, 22812}, {747501, 26365}, {748001, 23467}, {748501, 27407}, 
     {749001, 25956}, {749501, 26609}, {750001, 23837}, {750501, 25269}, 
     {751001, 28046}, {751501, 26008}, {752001, 23302}, {752501, 26340}, 
     {753001, 25813}, {753501, 24715}, {754001, 26002}, {754501, 26743}, 
     {755001, 27414}, {755501, 26976}, {756001, 22159}, {756501, 28159}, 
     {757001, 29181}, {757501, 19646}, {758001, 24389}, {758501, 34057}, 
     {759001, 28220}, {759501, 23040}, {760001, 20797}, {760501, 22710}, 
     {761001, 29239}, {761501, 19828}, {762001, 33024}, {762501, 24843}, 
     {763001, 18812}, {763501, 27323}, {764001, 26062}, {764501, 33391}, 
     {765001, 28447}, {765501, 26204}, {766001, 25776}, {766501, 20655}, 
     {767001, 43259}, {767501, 26659}, {768001, 22052}, {768501, 22141}, 
     {769001, 24830}, {769501, 26998}, {770001, 27378}, {770501, 30198}, 
     {771001, 35917}, {771501, 33512}, {772001, 27583}, {772501, 28573}, 
     {773001, 34191}, {773501, 32206}, {774001, 28948}, {774501, 25955}, 
     {775001, 28155}, {775501, 27612}, {776001, 30379}, {776501, 21850}, 
     {777001, 21130}, {777501, 31768}, {778001, 30077}, {778501, 30869}, 
     {779001, 20262}, {779501, 23304}, {780001, 31547}, {780501, 16225}, 
     {781001, 2111}, {781501, 15988}, {782001, 24351}, {782501, 15946}, 
     {783001, 24660}, {783501, 23323}, {784001, 32494}, {784501, 22827}, 
     {785001, 29620}, {785501, 19853}, {786001, 31936}, {786501, 28327}, 
     {787001, 29765}, {787501, 20043}, {788001, 33172}, {788501, 36961}, 
     {789001, 26453}, {789501, 11037}, {790001, 37007}, {790501, 29542}, 
     {791001, 29332}, {791501, 15764}, {792001, 26288}, {792501, 18020}, 
     {793001, 26709}, {793501, 14007}, {794001, 15223}, {794501, 33496}, 
     {795001, 14783}, {795501, 33047}, {796001, 38577}, {796501, 25707}, 
     {797001, 38980}, {797501, 31681}, {798001, 15682}, {798501, 20936}, 
     {799001, 28672}, {799501, 12215}, {800001, 28881}, {800501, 26669}, 
     {801001, 24899}, {801501, 16542}, {802001, 38390}, {802501, 31361}, 
     {803001, 31018}, {803501, 30295}, {804001, 10461}, {804501, 19698}, 
     {805001, 20056}, {805501, 28282}, {806001, 27927}, {806501, 22365}, 
     {807001, 25487}, {807501, 42633}, {808001, 26513}, {808501, 27435}, 
     {809001, 8159}, {809501, 9509}, {810001, 30240}, {810501, 22640}, 
     {811001, 26447}, {811501, 30024}, {812001, -2768}, {812501, 29786}, 
     {813001, 14131}, {813501, 29402}, {814001, 11468}, {814501, 16184}, 
     {815001, 18906}, {815501, 25071}, {816001, 18644}, {816501, 10327}, 
     {817001, 24786}, {817501, 26810}, {818001, 37524}, {818501, 5654}, 
     {819001, 30309}, {819501, 18879}, {820001, 20188}, {820501, 6863}, 
     {821001, 22517}, {821501, 19721}, {822001, 31285}, {822501, 37595}, 
     {823001, 20997}, {823501, 39039}, {824001, 25691}, {824501, 31693}, 
     {825001, 38858}, {825501, 22735}, {826001, 4305}, {826501, 38306}, 
     {827001, 41801}, {827501, 21426}, {828001, 29864}, {828501, 25483}, 
     {829001, 30219}, {829501, 12126}, {830001, 12283}, {830501, 30292}, 
     {831001, 21794}, {831501, 28110}, {832001, 18318}, {832501, 25833}, 
     {833001, 33819}, {833501, 2094}, {834001, 44856}, {834501, 30543}, 
     {835001, 31071}, {835501, 25522}, {836001, 24259}, {836501, 42213}, 
     {837001, 20467}, {837501, 39757}, {838001, 34508}, {838501, 33655}, 
     {839001, 23849}, {839501, 30669}, {840001, 22751}, {840501, 15503}, 
     {841001, 20880}, {841501, 33893}, {842001, 14882}, {842501, 24062}, 
     {843001, 21369}, {843501, 6975}, {844001, 33504}, {844501, 21980}, 
     {845001, 16293}, {845501, 19030}, {846001, 6427}, {846501, 33604}, 
     {847001, 27664}, {847501, 36261}, {848001, 16337}, {848501, 34401}, 
     {849001, 11969}, {849501, 22871}, {850001, 22008}, {850501, 29878}, 
     {851001, 43725}, {851501, 35667}, {852001, 24824}, {852501, 32203}, 
     {853001, 36410}, {853501, 27556}, {854001, 12813}, {854501, 27830}, 
     {855001, 23204}, {855501, 33223}, {856001, 17849}, {856501, 23178}, 
     {857001, 26234}, {857501, 5357}, {858001, 27006}, {858501, 27407}, 
     {859001, 28681}, {859501, 15822}, {860001, 29305}, {860501, 35247}, 
     {861001, 39431}, {861501, 22631}, {862001, 26186}, {862501, 11634}, 
     {863001, 15657}, {863501, 11371}, {864001, 29519}, {864501, 18030}, 
     {865001, 16018}, {865501, 32278}, {866001, 20376}, {866501, 19594}, 
     {867001, 20261}, {867501, 10915}, {868001, 40124}, {868501, 22006}, 
     {869001, 19357}, {869501, 12013}, {870001, -13170}, {870501, 21655}, 
     {871001, 39065}, {871501, 18775}, {872001, 40355}, {872501, 22114}, 
     {873001, 511}, {873501, 48932}, {874001, 16952}, {874501, 4085}, 
     {875001, 27822}, {875501, 20318}, {876001, 21974}, {876501, 47418}, 
     {877001, 10098}, {877501, 16966}, {878001, 7289}, {878501, 19019}, 
     {879001, 33498}, {879501, 15353}, {880001, 17481}, {880501, 12242}, 
     {881001, 19300}, {881501, 11599}, {882001, 31800}, {882501, 36480}, 
     {883001, 42077}, {883501, 32890}, {884001, 27875}, {884501, 31210}, 
     {885001, 39684}, {885501, 14095}, {886001, 26451}, {886501, 39416}, 
     {887001, 23184}, {887501, 31622}, {888001, 32264}, {888501, 26056}, 
     {889001, 19946}, {889501, 28056}, {890001, 35641}, {890501, 45004}, 
     {891001, 19813}, {891501, 20347}, {892001, 14868}, {892501, -7754}, 
     {893001, 16963}, {893501, 27528}, {894001, 8867}, {894501, 29964}, 
     {895001, 11928}, {895501, 33866}, {896001, 31681}, {896501, 15076}, 
     {897001, 16467}, {897501, 11178}, {898001, 23751}, {898501, 23796}, 
     {899001, 17735}, {899501, 24296}, {900001, 14793}, {900501, 42914}, 
     {901001, 32844}, {901501, 8874}, {902001, 24262}, {902501, 12630}, 
     {903001, 47746}, {903501, -5835}, {904001, 37708}, {904501, 13245}, 
     {905001, 13672}, {905501, 20634}, {906001, 19535}, {906501, 24023}, 
     {907001, 46142}, {907501, 22196}, {908001, 15190}, {908501, 14020}, 
     {909001, 19319}, {909501, 60527}, {910001, 25508}, {910501, 25582}, 
     {911001, 13695}, {911501, 11129}, {912001, 16916}, {912501, 26720}, 
     {913001, 20435}, {913501, 27745}, {914001, 21023}, {914501, 8298}, 
     {915001, 5369}, {915501, 4727}, {916001, 34212}, {916501, 19611}, 
     {917001, 31274}, {917501, 30418}, {918001, 20570}, {918501, 31473}, 
     {919001, 36366}, {919501, 31575}, {920001, 36745}, {920501, 33748}, 
     {921001, 17052}, {921501, -3818}, {922001, 6216}, {922501, 22336}, 
     {923001, 17708}, {923501, 40129}, {924001, -1006}, {924501, 29587}, 
     {925001, 43338}, {925501, 37653}, {926001, 32404}, {926501, 37222}, 
     {927001, 35040}, {927501, 18572}, {928001, 10304}, {928501, 12747}, 
     {929001, 19527}, {929501, 13810}, {930001, 6538}, {930501, 3637}, 
     {931001, 41345}, {931501, 11389}, {932001, -5046}, {932501, 14745}, 
     {933001, 27314}, {933501, 10482}, {934001, 23759}, {934501, 20163}, 
     {935001, 17640}, {935501, 4803}, {936001, 26542}, {936501, -3131}, 
     {937001, 25930}, {937501, 13313}, {938001, 35234}, {938501, 37185}, 
     {939001, 23214}, {939501, -2855}, {940001, 26050}, {940501, 11653}, 
     {941001, 36585}, {941501, 23270}, {942001, 14554}, {942501, 6709}, 
     {943001, 24831}, {943501, 43925}, {944001, 24726}, {944501, 26692}, 
     {945001, 25131}, {945501, 4366}, {946001, 15950}, {946501, 8792}, 
     {947001, 6137}, {947501, 28522}, {948001, 4021}, {948501, 12101}, 
     {949001, 19413}, {949501, 26931}, {950001, 29632}, {950501, 12734}, 
     {951001, 15027}, {951501, 30331}, {952001, 31961}, {952501, 42596}, 
     {953001, 32838}, {953501, 19196}, {954001, 33845}, {954501, 23603}, 
     {955001, -14854}, {955501, -15738}, {956001, 33465}, {956501, 6202}, 
     {957001, 11926}, {957501, 16448}, {958001, -8444}, {958501, 30847}, 
     {959001, 30393}, {959501, 12743}, {960001, 13223}, {960501, 25101}, 
     {961001, -4914}, {961501, 13790}, {962001, 270}, {962501, 21726}, 
     {963001, 899}, {963501, 17360}, {964001, -309}, {964501, 17092}, 
     {965001, 24380}, {965501, 27531}, {966001, 295}, {966501, 5995}, 
     {967001, 6234}, {967501, -5650}, {968001, 26631}, {968501, 38027}, 
     {969001, -1172}, {969501, 2027}, {970001, 32187}, {970501, -17689}, 
     {971001, 14800}, {971501, -1024}, {972001, 16432}, {972501, 18204}, 
     {973001, 21037}, {973501, 9890}, {974001, 20118}, {974501, 55}, 
     {975001, 25881}, {975501, -4600}, {976001, 16598}, {976501, 21965}, 
     {977001, 3524}, {977501, 23774}, {978001, 36351}, {978501, 16204}, 
     {979001, 22285}, {979501, 35068}, {980001, 18840}, {980501, 9441}, 
     {981001, -4066}, {981501, 17258}, {982001, 21317}, {982501, 41301}, 
     {983001, 9436}, {983501, 5265}, {984001, -4719}, {984501, 14520}, 
     {985001, -5666}, {985501, 29947}, {986001, 20369}, {986501, 1286}, 
     {987001, 13178}, {987501, -938}, {988001, 20293}, {988501, 31501}, 
     {989001, 25180}, {989501, 13959}, {990001, 18507}, {990501, 26239}, 
     {991001, 23712}, {991501, -2737}, {992001, 18526}, {992501, 47137}, 
     {993001, -3668}, {993501, 9540}, {994001, 21676}, {994501, 49903}, 
     {995001, 33677}, {995501, -2547}, {996001, 7855}, {996501, 15387}, 
     {997001, 17334}, {997501, 12935}, {998001, 11188}, {998501, 9538}, 
     {999001, 18520}, {999501, -8404}, {1000001, 21216}, {1000501, -3987}, 
     {1001001, -16267}, {1001501, 33234}, {1002001, 19089}, {1002501, 8439}, 
     {1003001, 4057}, {1003501, -6509}, {1004001, -448}, {1004501, 13364}, 
     {1005001, 27519}, {1005501, 24396}, {1006001, 10408}, {1006501, 8122}, 
     {1007001, 1063}, {1007501, 28365}, {1008001, 20824}, {1008501, 16119}, 
     {1009001, 15009}, {1009501, 20321}, {1010001, -5006}, {1010501, 19544}, 
     {1011001, -11380}, {1011501, 17236}, {1012001, 20202}, {1012501, 13904}, 
     {1013001, 1918}, {1013501, 13539}, {1014001, 34507}, {1014501, 4104}, 
     {1015001, 10839}, {1015501, 16221}, {1016001, 13974}, {1016501, 1872}, 
     {1017001, -12061}, {1017501, 1921}, {1018001, -1363}, {1018501, 9358}, 
     {1019001, -6023}, {1019501, 9842}, {1020001, 13661}, {1020501, -11750}, 
     {1021001, 16453}, {1021501, 10957}, {1022001, 15311}, {1022501, -15004}, 
     {1023001, 4031}, {1023501, 2111}, {1024001, 9394}, {1024501, -13284}, 
     {1025001, -17559}, {1025501, 1170}, {1026001, 40}, {1026501, 30226}, 
     {1027001, -6642}, {1027501, -221}, {1028001, -11568}, {1028501, -11999}, 
     {1029001, 3173}, {1029501, 28129}, {1030001, -3179}, {1030501, 2622}, 
     {1031001, 6021}, {1031501, -7034}, {1032001, -3683}, {1032501, -6015}, 
     {1033001, 16567}, {1033501, 4706}, {1034001, -12380}, {1034501, -6426}, 
     {1035001, 20969}, {1035501, 5746}, {1036001, -14115}, {1036501, 11508}, 
     {1037001, 5042}, {1037501, -21790}, {1038001, 8585}, {1038501, 13317}, 
     {1039001, 8756}, {1039501, 2786}, {1040001, 10143}, {1040501, 85}, 
     {1041001, 12100}, {1041501, -13835}, {1042001, 9192}, {1042501, 18290}, 
     {1043001, -4096}, {1043501, -17421}, {1044001, 6940}, {1044501, -4438}, 
     {1045001, -5686}, {1045501, 13529}, {1046001, -1702}, {1046501, 15837}, 
     {1047001, 6294}, {1047501, 11262}, {1048001, -15929}, {1048501, 12423}, 
     {1049001, 8968}, {1049501, -5611}, {1050001, -3801}, {1050501, -9544}, 
     {1051001, -3253}, {1051501, 12775}, {1052001, 2973}, {1052501, 9155}, 
     {1053001, 6950}, {1053501, 26390}, {1054001, -3886}, {1054501, -7791}, 
     {1055001, -22483}, {1055501, -4794}, {1056001, -4532}, 
     {1056501, -22940}, {1057001, 2714}, {1057501, 12790}, {1058001, -9894}, 
     {1058501, -20518}, {1059001, 2985}, {1059501, 19985}, {1060001, 2314}, 
     {1060501, 11206}, {1061001, 27388}, {1061501, 8588}, {1062001, 5794}, 
     {1062501, -5616}, {1063001, 8179}, {1063501, -11469}, {1064001, -5475}, 
     {1064501, 17511}, {1065001, 26271}, {1065501, 32429}, {1066001, -2065}, 
     {1066501, 7165}, {1067001, 16961}, {1067501, 12879}, {1068001, -3709}, 
     {1068501, 3637}, {1069001, 2422}, {1069501, -4682}, {1070001, 13341}, 
     {1070501, 2904}, {1071001, 7671}, {1071501, 8573}, {1072001, -1564}, 
     {1072501, 15187}, {1073001, -8232}, {1073501, 5435}, {1074001, -15387}, 
     {1074501, -9954}, {1075001, 1294}, {1075501, 15514}, {1076001, -1545}, 
     {1076501, 36527}, {1077001, -7821}, {1077501, 1268}, {1078001, -2527}, 
     {1078501, 23142}, {1079001, 13036}, {1079501, 17286}, {1080001, 11501}, 
     {1080501, 5940}, {1081001, 21205}, {1081501, 19687}, {1082001, 8056}, 
     {1082501, 18430}, {1083001, -2303}, {1083501, -5762}, {1084001, 26954}, 
     {1084501, 681}, {1085001, 1178}, {1085501, 5683}, {1086001, -8572}, 
     {1086501, 6015}, {1087001, 37383}, {1087501, 11267}, {1088001, 10486}, 
     {1088501, -6316}, {1089001, -15987}, {1089501, -6736}, {1090001, 17230}, 
     {1090501, -28}, {1091001, -1565}, {1091501, 12474}, {1092001, 2163}, 
     {1092501, 7440}, {1093001, 615}, {1093501, 5888}, {1094001, 17901}, 
     {1094501, -5079}, {1095001, 7057}, {1095501, 9404}, {1096001, 19793}, 
     {1096501, 8055}, {1097001, 38320}, {1097501, 15522}, {1098001, 9500}, 
     {1098501, 13685}, {1099001, 655}, {1099501, -9415}, {1100001, -12560}, 
     {1100501, 27574}, {1101001, 6274}, {1101501, 20671}, {1102001, 32679}, 
     {1102501, 9625}, {1103001, 22259}, {1103501, -15427}, {1104001, 23650}, 
     {1104501, -1697}, {1105001, -3857}, {1105501, 3130}, {1106001, 22642}, 
     {1106501, 8729}, {1107001, 14674}, {1107501, 19569}, {1108001, 12360}, 
     {1108501, 31387}, {1109001, 9318}, {1109501, 14688}, {1110001, 6350}, 
     {1110501, 3482}, {1111001, 15429}, {1111501, 47154}, {1112001, 24588}, 
     {1112501, 19092}, {1113001, 32330}, {1113501, 10908}, {1114001, -7448}, 
     {1114501, 34744}, {1115001, 3720}, {1115501, 8305}, {1116001, 21003}, 
     {1116501, 980}, {1117001, 13797}, {1117501, 5581}, {1118001, 37179}, 
     {1118501, 32230}, {1119001, 8967}, {1119501, 10383}, {1120001, 812}, 
     {1120501, 11973}, {1121001, -2703}, {1121501, -12117}, {1122001, 11494}, 
     {1122501, 32849}, {1123001, 22095}, {1123501, -20540}, {1124001, 32217}, 
     {1124501, 419}, {1125001, 22453}, {1125501, 22508}, {1126001, 40905}, 
     {1126501, 9323}, {1127001, 13908}, {1127501, 34202}, {1128001, 26174}, 
     {1128501, 8678}, {1129001, 14765}, {1129501, 12824}, {1130001, 23330}, 
     {1130501, 13674}, {1131001, -2323}, {1131501, 32451}, {1132001, 25607}, 
     {1132501, 20834}, {1133001, 22028}, {1133501, 40232}, {1134001, 16726}, 
     {1134501, 12164}, {1135001, 16609}, {1135501, -4323}, {1136001, 4598}, 
     {1136501, 26212}, {1137001, 13084}, {1137501, -6789}, {1138001, 19540}, 
     {1138501, 32727}, {1139001, 28793}, {1139501, 29855}, {1140001, 6054}, 
     {1140501, 7199}, {1141001, -4835}, {1141501, 8388}, {1142001, 25853}, 
     {1142501, 17639}, {1143001, -4908}, {1143501, -17450}, {1144001, 27768}, 
     {1144501, 26369}, {1145001, 11200}, {1145501, 27205}, {1146001, 33837}, 
     {1146501, 19752}, {1147001, 49349}, {1147501, 44238}, {1148001, 28346}, 
     {1148501, 19108}, {1149001, 12480}, {1149501, 10424}, {1150001, -1429}, 
     {1150501, 9505}, {1151001, 11232}, {1151501, 15881}, {1152001, 23262}, 
     {1152501, 4931}, {1153001, 27605}, {1153501, 29277}, {1154001, 7856}, 
     {1154501, 9034}, {1155001, 41202}, {1155501, 35132}, {1156001, 22371}, 
     {1156501, 13398}, {1157001, 20397}, {1157501, 17380}, {1158001, 25317}, 
     {1158501, 3665}, {1159001, 30594}, {1159501, 27898}, {1160001, 6185}, 
     {1160501, 32896}, {1161001, 12036}, {1161501, 31223}, {1162001, 29321}, 
     {1162501, 39133}, {1163001, 31190}, {1163501, 15302}, {1164001, 23979}, 
     {1164501, 20177}, {1165001, 27450}, {1165501, 34423}, {1166001, 41373}, 
     {1166501, 16720}, {1167001, 41305}, {1167501, 12212}, {1168001, 32514}, 
     {1168501, 12956}, {1169001, 10534}, {1169501, 41628}, {1170001, 29233}, 
     {1170501, 18411}, {1171001, 23907}, {1171501, 16664}, {1172001, 15052}, 
     {1172501, 14532}, {1173001, 4082}, {1173501, 24226}, {1174001, 17105}, 
     {1174501, 34039}, {1175001, 30939}, {1175501, 36613}, {1176001, 31821}, 
     {1176501, 28076}, {1177001, 16335}, {1177501, 28679}, {1178001, 54338}, 
     {1178501, 29900}, {1179001, 39758}, {1179501, 22425}, {1180001, 13528}, 
     {1180501, 58276}, {1181001, 36931}, {1181501, 30686}, {1182001, 13340}, 
     {1182501, 32282}, {1183001, 26303}, {1183501, 34981}, {1184001, 8999}, 
     {1184501, 18886}, {1185001, 18553}, {1185501, 17473}, {1186001, 13738}, 
     {1186501, 12870}, {1187001, 32639}, {1187501, 35421}, {1188001, 14306}, 
     {1188501, 3087}, {1189001, 30898}, {1189501, 23059}, {1190001, -4604}, 
     {1190501, 17105}, {1191001, 20270}, {1191501, 20982}, {1192001, 33064}, 
     {1192501, 31064}, {1193001, 31370}, {1193501, 48539}, {1194001, 28214}, 
     {1194501, 18058}, {1195001, 19376}, {1195501, 23619}, {1196001, 10866}, 
     {1196501, 25630}, {1197001, 15998}, {1197501, 39133}, {1198001, 14905}, 
     {1198501, -54}, {1199001, 25419}, {1199501, 17538}, {1200001, 28566}, 
     {1200501, 33985}, {1201001, 27840}, {1201501, 16043}, {1202001, 27488}, 
     {1202501, 27672}, {1203001, 39929}, {1203501, 13245}, {1204001, 12217}, 
     {1204501, 25733}, {1205001, 42472}, {1205501, 47343}, {1206001, 16747}, 
     {1206501, 35752}, {1207001, 14831}, {1207501, 34399}, {1208001, 47310}, 
     {1208501, 32200}, {1209001, 39913}, {1209501, 19839}, {1210001, 24415}, 
     {1210501, 36648}, {1211001, 17964}, {1211501, 24415}, {1212001, 28456}, 
     {1212501, 44166}, {1213001, 42487}, {1213501, 26006}, {1214001, 7254}, 
     {1214501, 27849}, {1215001, 48072}, {1215501, 52878}, {1216001, 35716}, 
     {1216501, 44651}, {1217001, 30390}, {1217501, 49433}, {1218001, 27591}, 
     {1218501, 41786}, {1219001, 22558}, {1219501, 13732}, {1220001, 29103}, 
     {1220501, 60451}, {1221001, 39448}, {1221501, 28849}, {1222001, 23505}, 
     {1222501, 62282}, {1223001, 22143}, {1223501, 34229}, {1224001, 27349}, 
     {1224501, 16687}, {1225001, 40779}, {1225501, 19648}, {1226001, 19497}, 
     {1226501, 21917}, {1227001, 24958}, {1227501, 40891}, {1228001, 29141}, 
     {1228501, 37876}, {1229001, 42914}, {1229501, 30114}, {1230001, 28230}, 
     {1230501, 32432}, {1231001, 32816}, {1231501, 61284}, {1232001, 20418}, 
     {1232501, 28501}, {1233001, 29784}, {1233501, 13974}, {1234001, 30294}, 
     {1234501, 42511}, {1235001, 29675}, {1235501, 17460}, {1236001, 27816}, 
     {1236501, 22569}, {1237001, 31179}, {1237501, 37508}, {1238001, 40555}, 
     {1238501, 36742}, {1239001, 37248}, {1239501, 49972}, {1240001, 49486}, 
     {1240501, 40308}, {1241001, 34165}, {1241501, 40807}, {1242001, 40795}, 
     {1242501, 34507}, {1243001, 44930}, {1243501, 25958}, {1244001, 35652}, 
     {1244501, 39689}, {1245001, 37505}, {1245501, 28395}, {1246001, 27075}, 
     {1246501, 35604}, {1247001, 43003}, {1247501, 35454}, {1248001, 32294}, 
     {1248501, 29189}, {1249001, 53868}, {1249501, 28964}, {1250001, 31095}, 
     {1250501, 37652}, {1251001, 45182}, {1251501, 58690}, {1252001, 27688}, 
     {1252501, 25543}, {1253001, 31993}, {1253501, 47891}, {1254001, 41065}, 
     {1254501, 16341}, {1255001, 29078}, {1255501, 35746}, {1256001, 29940}, 
     {1256501, 38723}, {1257001, 29429}, {1257501, 45904}, {1258001, 33299}, 
     {1258501, 22399}, {1259001, 60658}, {1259501, 39118}, {1260001, 30912}, 
     {1260501, 43515}, {1261001, 27120}, {1261501, 24254}, {1262001, 33297}, 
     {1262501, 42142}, {1263001, 20229}, {1263501, 34414}, {1264001, 52986}, 
     {1264501, 50014}, {1265001, 46014}, {1265501, 23085}, {1266001, 44664}, 
     {1266501, 43088}, {1267001, 28900}, {1267501, 46853}, {1268001, 31673}, 
     {1268501, 26230}, {1269001, 25449}, {1269501, 39927}, {1270001, 29670}, 
     {1270501, 19883}, {1271001, 30630}, {1271501, 52182}, {1272001, 38624}, 
     {1272501, 32983}, {1273001, 35610}, {1273501, 25195}, {1274001, 53443}, 
     {1274501, 40721}, {1275001, 42692}, {1275501, 23451}, {1276001, 42593}, 
     {1276501, 52344}, {1277001, 31664}, {1277501, 21244}, {1278001, 12737}, 
     {1278501, 14975}, {1279001, 48772}, {1279501, 57886}, {1280001, 43939}, 
     {1280501, 27341}, {1281001, 45342}, {1281501, 22292}, {1282001, 44869}, 
     {1282501, 33717}, {1283001, 36496}, {1283501, 28783}, {1284001, 41973}, 
     {1284501, 43711}, {1285001, 45045}, {1285501, 31715}, {1286001, 43920}, 
     {1286501, 29236}, {1287001, 14950}, {1287501, 50428}, {1288001, 53122}, 
     {1288501, 43196}, {1289001, 32478}, {1289501, 31100}, {1290001, 37698}, 
     {1290501, 36792}, {1291001, 33773}, {1291501, 35063}, {1292001, 43184}, 
     {1292501, 34002}, {1293001, 29045}, {1293501, 30724}, {1294001, 29050}, 
     {1294501, 44451}, {1295001, 42462}, {1295501, 34046}, {1296001, 40258}, 
     {1296501, 34161}, {1297001, 32485}, {1297501, 52997}, {1298001, 49548}, 
     {1298501, 15246}, {1299001, 51526}, {1299501, 28527}, {1300001, 26014}, 
     {1300501, 31557}, {1301001, 36942}, {1301501, 47670}, {1302001, 34813}, 
     {1302501, 44589}, {1303001, 16598}, {1303501, 39884}, {1304001, 45919}, 
     {1304501, 25401}, {1305001, 40641}, {1305501, 18956}, {1306001, 37156}, 
     {1306501, 39810}, {1307001, 33224}, {1307501, 45115}, {1308001, 59970}, 
     {1308501, 31720}, {1309001, 22874}, {1309501, 35059}, {1310001, 33893}, 
     {1310501, 42636}, {1311001, 48518}, {1311501, 56065}, {1312001, 48776}, 
     {1312501, 30831}, {1313001, 45718}, {1313501, 19211}, {1314001, 30587}, 
     {1314501, 32809}, {1315001, 19371}, {1315501, 33339}, {1316001, 37238}, 
     {1316501, 45769}, {1317001, 29021}, {1317501, 44215}, {1318001, 39502}, 
     {1318501, 41480}, {1319001, 36804}, {1319501, 47986}, {1320001, 42000}, 
     {1320501, 51492}, {1321001, 48250}, {1321501, 44811}, {1322001, 36418}, 
     {1322501, 40920}, {1323001, 24926}, {1323501, 36240}, {1324001, 34623}, 
     {1324501, 29660}, {1325001, 50111}, {1325501, 39004}, {1326001, 36048}, 
     {1326501, 58547}, {1327001, 42853}, {1327501, 57572}, {1328001, 64266}, 
     {1328501, 45098}, {1329001, 39345}, {1329501, 32771}, {1330001, 40882}, 
     {1330501, 31202}, {1331001, 37830}, {1331501, 43881}, {1332001, 38471}, 
     {1332501, 47394}, {1333001, 25810}, {1333501, 42506}, {1334001, 38558}, 
     {1334501, 62874}, {1335001, 41741}, {1335501, 34276}, {1336001, 38141}, 
     {1336501, 49321}, {1337001, 41005}, {1337501, 27954}, {1338001, 47606}, 
     {1338501, 31994}, {1339001, 52476}, {1339501, 45108}, {1340001, 40364}, 
     {1340501, 42272}, {1341001, 30340}, {1341501, 36834}, {1342001, 38840}, 
     {1342501, 43325}, {1343001, 39148}, {1343501, 38623}, {1344001, 40064}, 
     {1344501, 26191}, {1345001, 55168}, {1345501, 44358}, {1346001, 50193}, 
     {1346501, 41349}, {1347001, 41910}, {1347501, 52994}, {1348001, 35085}, 
     {1348501, 39253}, {1349001, 50169}, {1349501, 56542}, {1350001, 45860}, 
     {1350501, 54160}, {1351001, 39170}, {1351501, 30453}, {1352001, 37099}, 
     {1352501, 56403}, {1353001, 33827}, {1353501, 46360}, {1354001, 40401}, 
     {1354501, 51428}, {1355001, 39090}, {1355501, 38087}, {1356001, 39216}, 
     {1356501, 47842}, {1357001, 30999}, {1357501, 44020}, {1358001, 31125}, 
     {1358501, 51804}, {1359001, 50700}, {1359501, 52345}, {1360001, 27686}, 
     {1360501, 22028}, {1361001, 39190}, {1361501, 37619}, {1362001, 55402}, 
     {1362501, 58181}, {1363001, 42648}, {1363501, 40758}, {1364001, 43381}, 
     {1364501, 35662}, {1365001, 34433}, {1365501, 42157}, {1366001, 35463}, 
     {1366501, 39674}, {1367001, 40660}, {1367501, 53588}, {1368001, 39453}, 
     {1368501, 48041}, {1369001, 49812}, {1369501, 43360}, {1370001, 51685}, 
     {1370501, 45848}, {1371001, 48678}, {1371501, 30060}, {1372001, 39964}, 
     {1372501, 43548}, {1373001, 41979}, {1373501, 46335}, {1374001, 44426}, 
     {1374501, 45442}, {1375001, 43210}, {1375501, 42338}, {1376001, 33711}, 
     {1376501, 44880}, {1377001, 45792}, {1377501, 42689}, {1378001, 40184}, 
     {1378501, 43030}, {1379001, 43042}, {1379501, 33711}, {1380001, 50196}, 
     {1380501, 45844}, {1381001, 51614}, {1381501, 51510}, {1382001, 42536}, 
     {1382501, 53466}, {1383001, 51742}, {1383501, 39261}, {1384001, 40509}, 
     {1384501, 50966}, {1385001, 49727}, {1385501, 45344}, {1386001, 40481}, 
     {1386501, 46124}, {1387001, 35398}, {1387501, 47396}, {1388001, 39944}, 
     {1388501, 37176}, {1389001, 44775}, {1389501, 44037}, {1390001, 41473}, 
     {1390501, 52015}, {1391001, 43209}, {1391501, 40051}, {1392001, 45285}, 
     {1392501, 35202}, {1393001, 47187}, {1393501, 42692}, {1394001, 48290}, 
     {1394501, 41056}, {1395001, 42886}, {1395501, 35302}, {1396001, 55257}, 
     {1396501, 50967}, {1397001, 41175}, {1397501, 41734}, {1398001, 47470}, 
     {1398501, 36114}, {1399001, 43770}, {1399501, 47495}, {1400001, 55407}, 
     {1400501, 35652}, {1401001, 51143}, {1401501, 47771}, {1402001, 47504}, 
     {1402501, 40369}, {1403001, 44088}, {1403501, 51794}, {1404001, 56902}, 
     {1404501, 43816}, {1405001, 45774}, {1405501, 43094}, {1406001, 47065}, 
     {1406501, 44816}, {1407001, 46954}, {1407501, 45424}, {1408001, 42038}, 
     {1408501, 42059}, {1409001, 45487}, {1409501, 44459}, {1410001, 39222}, 
     {1410501, 50121}, {1411001, 44038}, {1411501, 44553}, {1412001, 45246}, 
     {1412501, 49438}, {1413001, 44113}, {1413501, 48717}, {1414001, 45404}, 
     {1414501, 43626}, {1415001, 44145}, {1415501, 48446}, {1416001, 45814}, 
     {1416501, 53732}, {1417001, 46469}, {1417501, 42524}, {1418001, 43628}, 
     {1418501, 45398}, {1419001, 48931}, {1419501, 49620}, {1420001, 41580}, 
     {1420501, 42222}, {1421001, 44556}, {1421501, 40332}, {1422001, 46459}, 
     {1422501, 52621}, {1423001, 45733}, {1423501, 43395}, {1424001, 47755}, 
     {1424501, 45812}, {1425001, 47823}, {1425501, 53165}, {1426001, 47291}, 
     {1426501, 42117}, {1427001, 55906}, {1427501, 47377}, {1428001, 45412}, 
     {1428501, 44694}, {1429001, 43612}, {1429501, 46139}, {1430001, 48180}, 
     {1430501, 52827}, {1431001, 45069}, {1431501, 46046}, {1432001, 44581}, 
     {1432501, 45085}, {1433001, 47407}, {1433501, 42720}, {1434001, 49949}, 
     {1434501, 51850}, {1435001, 50489}, {1435501, 46582}, {1436001, 47240}, 
     {1436501, 44349}, {1437001, 46038}, {1437501, 49985}, {1438001, 48903}, 
     {1438501, 47120}, {1439001, 47380}, {1439501, 47245}}
