# Supplementary material for: On Some Properties of the Hofstadter–Mertens Function
Source: Hindawi journal article supplement (doi:10.1155/2020/1816756), 2020-09-15
Supplement: f1 [file 1816756.f1.zip › Figure3.dat]

{{{0	0}	{1	0}}	{{10	0}	{11	0}}	{{20	-17}	{21	-17}}
{{30	-23}	{31	-23}}	{{40	38}	{41	38}}	{{50	-32}	{51	-32}}
{{60	32}	{61	32}}	{{70	-11}	{71	-11}}	{{80	-88}	{81	-88}}
{{90	2}	{91	2}}	{{100	153}	{101	153}}
{{110	-178}	{111	-178}}	{{120	-36}	{121	-36}}
{{130	5}	{131	5}}	{{140	-127}	{141	-127}}
{{150	160}	{151	160}}	{{160	163}	{161	163}}
{{170	-17}	{171	-17}}	{{180	-106}	{181	-106}}
{{190	-201}	{191	-201}}	{{200	-582}	{201	-582}}
{{210	163}	{211	163}}	{{220	712}	{221	712}}
{{230	352}	{231	352}}	{{240	131}	{241	131}}
{{250	117}	{251	117}}	{{260	-28}	{261	-28}}
{{270	-21}	{271	-21}}	{{280	-147}	{281	-147}}
{{290	-919}	{291	-919}}	{{300	-433}	{301	-433}}
{{310	26}	{311	26}}	{{320	-300}	{321	-300}}
{{330	533}	{331	533}}	{{340	702}	{341	702}}
{{350	522}	{351	522}}	{{360	179}	{361	179}}
{{370	-14}	{371	-14}}	{{380	-211}	{381	-211}}
{{390	68}	{391	68}}	{{400	596}	{401	596}}
{{410	36}	{411	36}}	{{420	444}	{421	444}}
{{430	-21}	{431	-21}}	{{440	-1118}	{441	-1118}}
{{450	-1080}	{451	-1080}}	{{460	-587}	{461	-587}}
{{470	-1054}	{471	-1054}}	{{480	-789}	{481	-789}}
{{490	-221}	{491	-221}}	{{500	-695}	{501	-695}}
{{510	-364}	{511	-364}}	{{520	725}	{521	725}}
{{530	501}	{531	501}}	{{540	1330}	{541	1330}}
{{550	1798}	{551	1798}}	{{560	2261}	{561	2261}}
{{570	2491}	{571	2491}}	{{580	2200}	{581	2200}}
{{590	2550}	{591	2550}}	{{600	2002}	{601	2002}}
{{610	200}	{611	200}}	{{620	-723}	{621	-723}}
{{630	232}	{631	232}}	{{640	545}	{641	545}}
{{650	-1107}	{651	-1107}}	{{660	-2434}	{661	-2434}}
{{670	-2775}	{671	-2775}}	{{680	-2782}	{681	-2782}}
{{690	-1744}	{691	-1744}}	{{700	-333}	{701	-333}}
{{710	-676}	{711	-676}}	{{720	45}	{721	45}}
{{730	41}	{731	41}}	{{740	399}	{741	399}}
{{750	402}	{751	402}}	{{760	18}	{761	18}}
{{770	524}	{771	524}}	{{780	1034}	{781	1034}}
{{790	653}	{791	653}}	{{800	1836}	{801	1836}}
{{810	1911}	{811	1911}}	{{820	2660}	{821	2660}}
{{830	-232}	{831	-232}}	{{840	200}	{841	200}}
{{850	1460}	{851	1460}}	{{860	496}	{861	496}}
{{870	1756}	{871	1756}}	{{880	2294}	{881	2294}}
{{890	916}	{891	916}}	{{900	1893}	{901	1893}}
{{910	1418}	{911	1418}}	{{920	1447}	{921	1447}}
{{930	3327}	{931	3327}}	{{940	3290}	{941	3290}}
{{950	2368}	{951	2368}}	{{960	3347}	{961	3347}}
{{970	2319}	{971	2319}}	{{980	2310}	{981	2310}}
{{990	2299}	{991	2299}}	{{1000	2100}	{1001	2100}}
{{1010	1023}	{1011	1023}}	{{1020	437}	{1021	437}}
{{1030	-1091}	{1031	-1091}}	{{1040	-3136}	{1041	-3136}}
{{1050	-1522}	{1051	-1522}}	{{1060	-972}	{1061	-972}}
{{1070	-3651}	{1071	-3651}}	{{1080	-2499}	{1081	-2499}}
{{1090	-3618}	{1091	-3618}}	{{1100	-4660}	{1101	-4660}}
{{1110	-6336}	{1111	-6336}}	{{1120	-5797}	{1121	-5797}}
{{1130	-5713}	{1131	-5713}}	{{1140	-3513}	{1141	-3513}}
{{1150	-1293}	{1151	-1293}}	{{1160	-649}	{1161	-649}}
{{1170	-660}	{1171	-660}}	{{1180	-1305}	{1181	-1305}}
{{1190	-1970}	{1191	-1970}}	{{1200	-691}	{1201	-691}}
{{1210	489}	{1211	489}}	{{1220	1646}	{1221	1646}}
{{1230	956}	{1231	956}}	{{1240	-296}	{1241	-296}}
{{1250	-347}	{1251	-347}}	{{1260	869}	{1261	869}}
{{1270	1385}	{1271	1385}}	{{1280	1331}	{1281	1331}}
{{1290	2064}	{1291	2064}}	{{1300	1393}	{1301	1393}}
{{1310	-557}	{1311	-557}}	{{1320	830}	{1321	830}}
{{1330	2150}	{1331	2150}}	{{1340	2189}	{1341	2189}}
{{1350	4889}	{1351	4889}}	{{1360	6246}	{1361	6246}}
{{1370	5549}	{1371	5549}}	{{1380	4833}	{1381	4833}}
{{1390	6916}	{1391	6916}}	{{1400	6923}	{1401	6923}}
{{1410	8312}	{1411	8312}}	{{1420	9740}	{1421	9740}}
{{1430	7589}	{1431	7589}}	{{1440	6137}	{1441	6137}}
{{1450	3957}	{1451	3957}}	{{1460	2466}	{1461	2466}}
{{1470	3956}	{1471	3956}}	{{1480	3977}	{1481	3977}}
{{1490	1737}	{1491	1737}}	{{1500	-1262}	{1501	-1262}}
{{1510	-490}	{1511	-490}}	{{1520	1028}	{1521	1028}}
{{1530	2123}	{1531	2123}}	{{1540	2050}	{1541	2050}}
{{1550	-268}	{1551	-268}}	{{1560	-1882}	{1561	-1882}}
{{1570	-864}	{1571	-864}}	{{1580	-1446}	{1581	-1446}}
{{1590	-2402}	{1591	-2402}}	{{1600	-3870}	{1601	-3870}}
{{1610	-6188}	{1611	-6188}}	{{1620	-8767}	{1621	-8767}}
{{1630	-10344}	{1631	-10344}}	{{1640	-10210}	{1641	-10210}}
{{1650	-6763}	{1651	-6763}}	{{1660	-6046}	{1661	-6046}}
{{1670	-9175}	{1671	-9175}}	{{1680	-6910}	{1681	-6910}}
{{1690	-5091}	{1691	-5091}}	{{1700	-8546}	{1701	-8546}}
{{1710	-8594}	{1711	-8594}}	{{1720	-4348}	{1721	-4348}}
{{1730	-5257}	{1731	-5257}}	{{1740	-4200}	{1741	-4200}}
{{1750	-7796}	{1751	-7796}}	{{1760	-7819}	{1761	-7819}}
{{1770	-2346}	{1771	-2346}}	{{1780	-3271}	{1781	-3271}}
{{1790	-5979}	{1791	-5979}}	{{1800	-2271}	{1801	-2271}}
{{1810	-2241}	{1811	-2241}}	{{1820	-397}	{1821	-397}}
{{1830	1413}	{1831	1413}}	{{1840	2315}	{1841	2315}}
{{1850	1417}	{1851	1417}}	{{1860	4110}	{1861	4110}}
{{1870	2295}	{1871	2295}}	{{1880	-1490}	{1881	-1490}}
{{1890	-3462}	{1891	-3462}}	{{1900	532}	{1901	532}}
{{1910	-1292}	{1911	-1292}}	{{1920	-177}	{1921	-177}}
{{1930	2682}	{1931	2682}}	{{1940	4613}	{1941	4613}}
{{1950	5583}	{1951	5583}}	{{1960	5410}	{1961	5410}}
{{1970	8320}	{1971	8320}}	{{1980	7448}	{1981	7448}}
{{1990	8419}	{1991	8419}}	{{2000	8452}	{2001	8452}}
{{2010	8466}	{2011	8466}}	{{2020	5619}	{2021	5619}}
{{2030	5692}	{2031	5692}}	{{2040	5656}	{2041	5656}}
{{2050	11822}	{2051	11822}}	{{2060	10975}	{2061	10975}}
{{2070	8858}	{2071	8858}}	{{2080	12033}	{2081	12033}}
{{2090	5508}	{2091	5508}}	{{2100	3284}	{2101	3284}}
{{2110	5295}	{2111	5295}}	{{2120	3260}	{2121	3260}}
{{2130	6704}	{2131	6704}}	{{2140	2430}	{2141	2430}}
{{2150	2462}	{2151	2462}}	{{2160	2454}	{2161	2454}}
{{2170	2571}	{2171	2571}}	{{2180	5763}	{2181	5763}}
{{2190	11226}	{2191	11226}}	{{2200	13449}	{2201	13449}}
{{2210	13687}	{2211	13687}}	{{2220	15702}	{2221	15702}}
{{2230	15911}	{2231	15911}}	{{2240	12390}	{2241	12390}}
{{2250	12246}	{2251	12246}}	{{2260	13449}	{2261	13449}}
{{2270	8830}	{2271	8830}}	{{2280	7618}	{2281	7618}}
{{2290	4245}	{2291	4245}}	{{2300	873}	{2301	873}}
{{2310	2164}	{2311	2164}}	{{2320	2107}	{2321	2107}}
{{2330	6661}	{2331	6661}}	{{2340	1922}	{2341	1922}}
{{2350	-492}	{2351	-492}}	{{2360	-2672}	{2361	-2672}}
{{2370	2103}	{2371	2103}}	{{2380	-2616}	{2381	-2616}}
{{2390	-8430}	{2391	-8430}}	{{2400	-10879}	{2401	-10879}}
{{2410	-13419}	{2411	-13419}}	{{2420	-12395}	{2421	-12395}}
{{2430	-11278}	{2431	-11278}}	{{2440	-11239}	{2441	-11239}}
{{2450	-10010}	{2451	-10010}}	{{2460	-10054}	{2461	-10054}}
{{2470	-6339}	{2471	-6339}}	{{2480	-3761}	{2481	-3761}}
{{2490	-1289}	{2491	-1289}}	{{2500	2255}	{2501	2255}}
{{2510	884}	{2511	884}}	{{2520	5790}	{2521	5790}}
{{2530	3274}	{2531	3274}}	{{2540	1831}	{2541	1831}}
{{2550	-2032}	{2551	-2032}}	{{2560	-3251}	{2561	-3251}}
{{2570	3205}	{2571	3205}}	{{2580	7057}	{2581	7057}}
{{2590	10949}	{2591	10949}}	{{2600	8355}	{2601	8355}}
{{2610	10918}	{2611	10918}}	{{2620	13637}	{2621	13637}}
{{2630	14849}	{2631	14849}}	{{2640	12134}	{2641	12134}}
{{2650	16067}	{2651	16067}}	{{2660	16015}	{2661	16015}}
{{2670	14700}	{2671	14700}}	{{2680	8055}	{2681	8055}}
{{2690	1347}	{2691	1347}}	{{2700	-5372}	{2701	-5372}}
{{2710	-6702}	{2711	-6702}}	{{2720	-14885}	{2721	-14885}}
{{2730	-14864}	{2731	-14864}}	{{2740	-14849}	{2741	-14849}}
{{2750	-14855}	{2751	-14855}}	{{2760	-17591}	{2761	-17591}}
{{2770	-21782}	{2771	-21782}}	{{2780	-21781}	{2781	-21781}}
{{2790	-23153}	{2791	-23153}}	{{2800	-27344}	{2801	-27344}}
{{2810	-31570}	{2811	-31570}}	{{2820	-25910}	{2821	-25910}}
{{2830	-28774}	{2831	-28774}}	{{2840	-28745}	{2841	-28745}}
{{2850	-28724}	{2851	-28724}}	{{2860	-25842}	{2861	-25842}}
{{2870	-21494}	{2871	-21494}}	{{2880	-24392}	{2881	-24392}}
{{2890	-22950}	{2891	-22950}}	{{2900	-21513}	{2901	-21513}}
{{2910	-20034}	{2911	-20034}}	{{2920	-21497}	{2921	-21497}}
{{2930	-20009}	{2931	-20009}}	{{2940	-20051}	{2941	-20051}}
{{2950	-17076}	{2951	-17076}}	{{2960	-18594}	{2961	-18594}}
{{2970	-18644}	{2971	-18644}}	{{2980	-14163}	{2981	-14163}}
{{2990	-6671}	{2991	-6671}}	{{3000	-3674}	{3001	-3674}}
{{3010	-2184}	{3011	-2184}}	{{3020	-5210}	{3021	-5210}}
{{3030	-3707}	{3031	-3707}}	{{3040	-2229}	{3041	-2229}}
{{3050	1039}	{3051	1039}}	{{3060	-2280}	{3061	-2280}}
{{3070	-368}	{3071	-368}}	{{3080	1329}	{3081	1329}}
{{3090	-122}	{3091	-122}}	{{3100	10656}	{3101	10656}}
{{3110	15458}	{3111	15458}}	{{3120	15691}	{3121	15691}}
{{3130	9639}	{3131	9639}}	{{3140	14351}	{3141	14351}}
{{3150	19421}	{3151	19421}}	{{3160	22211}	{3161	22211}}
{{3170	18752}	{3171	18752}}	{{3180	17571}	{3181	17571}}
{{3190	17376}	{3191	17376}}	{{3200	23778}	{3201	23778}}
{{3210	24728}	{3211	24728}}	{{3220	26237}	{3221	26237}}
{{3230	29499}	{3231	29499}}	{{3240	34784}	{3241	34784}}
{{3250	34808}	{3251	34808}}	{{3260	31784}	{3261	31784}}
{{3270	36982}	{3271	36982}}	{{3280	40264}	{3281	40264}}
{{3290	40313}	{3291	40313}}	{{3300	40234}	{3301	40234}}
{{3310	38782}	{3311	38782}}	{{3320	40126}	{3321	40126}}
{{3330	38704}	{3331	38704}}	{{3340	38444}	{3341	38444}}
{{3350	33123}	{3351	33123}}	{{3360	33133}	{3361	33133}}
{{3370	29774}	{3371	29774}}	{{3380	26198}	{3381	26198}}
{{3390	31346}	{3391	31346}}	{{3400	31283}	{3401	31283}}
{{3410	33149}	{3411	33149}}	{{3420	33209}	{3421	33209}}
{{3430	31646}	{3431	31646}}	{{3440	31579}	{3441	31579}}
{{3450	31470}	{3451	31470}}	{{3460	33292}	{3461	33292}}
{{3470	24583}	{3471	24583}}	{{3480	21224}	{3481	21224}}
{{3490	24654}	{3491	24654}}	{{3500	26300}	{3501	26300}}
{{3510	28488}	{3511	28488}}	{{3520	25150}	{3521	25150}}
{{3530	20091}	{3531	20091}}	{{3540	13032}	{3541	13032}}
{{3550	14798}	{3551	14798}}	{{3560	11184}	{3561	11184}}
{{3570	11269}	{3571	11269}}	{{3580	14865}	{3581	14865}}
{{3590	9653}	{3591	9653}}	{{3600	5942}	{3601	5942}}
{{3610	5969}	{3611	5969}}	{{3620	-1403}	{3621	-1403}}
{{3630	-1281}	{3631	-1281}}	{{3640	-6894}	{3641	-6894}}
{{3650	-2914}	{3651	-2914}}	{{3660	-6784}	{3661	-6784}}
{{3670	2259}	{3671	2259}}	{{3680	-5084}	{3681	-5084}}
{{3690	-8197}	{3691	-8197}}	{{3700	-6166}	{3701	-6166}}
{{3710	-8075}	{3711	-8075}}	{{3720	-6049}	{3721	-6049}}
{{3730	-11790}	{3731	-11790}}	{{3740	-11552}	{3741	-11552}}
{{3750	-5678}	{3751	-5678}}	{{3760	-1857}	{3761	-1857}}
{{3770	-7776}	{3771	-7776}}	{{3780	-3832}	{3781	-3832}}
{{3790	-5901}	{3791	-5901}}	{{3800	-6114}	{3801	-6114}}
{{3810	-3943}	{3811	-3943}}	{{3820	-5998}	{3821	-5998}}
{{3830	-5715}	{3831	-5715}}	{{3840	-5692}	{3841	-5692}}
{{3850	-6388}	{3851	-6388}}	{{3860	-16093}	{3861	-16093}}
{{3870	-8153}	{3871	-8153}}	{{3880	-12571}	{3881	-12571}}
{{3890	-18538}	{3891	-18538}}	{{3900	-10810}	{3901	-10810}}
{{3910	-5059}	{3911	-5059}}	{{3920	-16723}	{3921	-16723}}
{{3930	-18910}	{3931	-18910}}	{{3940	-23107}	{3941	-23107}}
{{3950	-23415}	{3951	-23415}}	{{3960	-19646}	{3961	-19646}}
{{3970	-25844}	{3971	-25844}}	{{3980	-17962}	{3981	-17962}}
{{3990	-16166}	{3991	-16166}}	{{4000	-11760}	{4001	-11760}}
{{4010	-13809}	{4011	-13809}}	{{4020	-23696}	{4021	-23696}}
{{4030	-23885}	{4031	-23885}}	{{4040	-17781}	{4041	-17781}}
{{4050	-20257}	{4051	-20257}}	{{4060	-20355}	{4061	-20355}}
{{4070	-18381}	{4071	-18381}}	{{4080	-20244}	{4081	-20244}}
{{4090	-26300}	{4091	-26300}}	{{4100	-34484}	{4101	-34484}}
{{4110	-24036}	{4111	-24036}}	{{4120	-22166}	{4121	-22166}}
{{4130	-21784}	{4131	-21784}}	{{4140	-22275}	{4141	-22275}}
{{4150	-22539}	{4151	-22539}}	{{4160	-30738}	{4161	-30738}}
{{4170	-22272}	{4171	-22272}}	{{4180	-22366}	{4181	-22366}}
{{4190	-11985}	{4191	-11985}}	{{4200	-7852}	{4201	-7852}}
{{4210	-16166}	{4211	-16166}}	{{4220	-20584}	{4221	-20584}}
{{4230	-14265}	{4231	-14265}}	{{4240	-20575}	{4241	-20575}}
{{4250	-22671}	{4251	-22671}}	{{4260	-31089}	{4261	-31089}}
{{4270	-22614}	{4271	-22614}}	{{4280	-22712}	{4281	-22712}}
{{4290	-18483}	{4291	-18483}}	{{4300	-17974}	{4301	-17974}}
{{4310	-11564}	{4311	-11564}}	{{4320	-7006}	{4321	-7006}}
{{4330	-7182}	{4331	-7182}}	{{4340	-9318}	{4341	-9318}}
{{4350	-14364}	{4351	-14364}}	{{4360	-11971}	{4361	-11971}}
{{4370	-11795}	{4371	-11795}}	{{4380	-13843}	{4381	-13843}}
{{4390	-7424}	{4391	-7424}}	{{4400	-11387}	{4401	-11387}}
{{4410	-15678}	{4411	-15678}}	{{4420	-4551}	{4421	-4551}}
{{4430	-2248}	{4431	-2248}}	{{4440	-6440}	{4441	-6440}}
{{4450	-6615}	{4451	-6615}}	{{4460	-13190}	{4461	-13190}}
{{4470	-8739}	{4471	-8739}}	{{4480	-64}	{4481	-64}}
{{4490	42}	{4491	42}}	{{4500	-723}	{4501	-723}}
{{4510	-2938}	{4511	-2938}}	{{4520	-7413}	{4521	-7413}}
{{4530	-7206}	{4531	-7206}}	{{4540	3813}	{4541	3813}}
{{4550	-1150}	{4551	-1150}}	{{4560	855}	{4561	855}}
{{4570	-6209}	{4571	-6209}}	{{4580	7748}	{4581	7748}}
{{4590	3283}	{4591	3283}}	{{4600	5578}	{4601	5578}}
{{4610	7716}	{4611	7716}}	{{4620	7596}	{4621	7596}}
{{4630	7622}	{4631	7622}}	{{4640	3034}	{4641	3034}}
{{4650	861}	{4651	861}}	{{4660	-5829}	{4661	-5829}}
{{4670	-8323}	{4671	-8323}}	{{4680	-5960}	{4681	-5960}}
{{4690	5508}	{4691	5508}}	{{4700	3030}	{4701	3030}}
{{4710	10323}	{4711	10323}}	{{4720	14958}	{4721	14958}}
{{4730	8074}	{4731	8074}}	{{4740	8060}	{4741	8060}}
{{4750	17405}	{4751	17405}}	{{4760	17478}	{4761	17478}}
{{4770	26784}	{4771	26784}}	{{4780	34019}	{4781	34019}}
{{4790	29440}	{4791	29440}}	{{4800	29907}	{4801	29907}}
{{4810	27542}	{4811	27542}}	{{4820	27647}	{4821	27647}}
{{4830	29743}	{4831	29743}}	{{4840	34604}	{4841	34604}}
{{4850	49080}	{4851	49080}}	{{4860	53602}	{4861	53602}}
{{4870	51340}	{4871	51340}}	{{4880	48889}	{4881	48889}}
{{4890	56063}	{4891	56063}}	{{4900	54085}	{4901	54085}}
{{4910	49323}	{4911	49323}}	{{4920	51618}	{4921	51618}}
{{4930	46751}	{4931	46751}}	{{4940	44106}	{4941	44106}}
{{4950	36767}	{4951	36767}}	{{4960	31836}	{4961	31836}}
{{4970	24334}	{4971	24334}}	{{4980	21868}	{4981	21868}}
{{4990	19644}	{4991	19644}}	{{5000	12160}	{5001	12160}}
{{5010	17137}	{5011	17137}}	{{5020	7143}	{5021	7143}}
{{5030	2302}	{5031	2302}}	{{5040	-7514}	{5041	-7514}}
{{5050	-2491}	{5051	-2491}}	{{5060	-4838}	{5061	-4838}}
{{5070	228}	{5071	228}}	{{5080	374}	{5081	374}}
{{5090	-4936}	{5091	-4936}}	{{5100	5079}	{5101	5079}}
{{5110	7721}	{5111	7721}}	{{5120	4900}	{5121	4900}}
{{5130	7449}	{5131	7449}}	{{5140	2206}	{5141	2206}}
{{5150	2263}	{5151	2263}}	{{5160	-2782}	{5161	-2782}}
{{5170	5182}	{5171	5182}}	{{5180	54}	{5181	54}}
{{5190	5032}	{5191	5032}}	{{5200	7667}	{5201	7667}}
{{5210	2583}	{5211	2583}}	{{5220	7834}	{5221	7834}}
{{5230	7551}	{5231	7551}}	{{5240	-160}	{5241	-160}}
{{5250	7572}	{5251	7572}}	{{5260	10138}	{5261	10138}}
{{5270	17987}	{5271	17987}}	{{5280	15277}	{5281	15277}}
{{5290	4434}	{5291	4434}}	{{5300	1545}	{5301	1545}}}
f3DAT = {{{0	0}	{1	0}}	{{3	-2}	{4	-2}}	{{6	-1}	{7	-1}}
{{9	-6}	{10	-6}}	{{12	-6}	{13	-6}}	{{15	4}	{16	4}}
{{18	-6}	{19	-6}}	{{21	-5}	{22	-5}}	{{24	-5}	{25	-5}}
{{27	9}	{28	9}}	{{30	-23}	{31	-23}}	{{33	-26}	{34	-26}}
{{36	15}	{37	15}}	{{39	38}	{40	38}}	{{42	-8}	{43	-8}}
{{45	-32}	{46	-32}}	{{48	-32}	{49	-32}}	{{51	-2}	{52	-2}}
{{54	-28}	{55	-28}}	{{57	34}	{58	34}}	{{60	32}	{61	32}}
{{63	32}	{64	32}}	{{66	25}	{67	25}}	{{69	29}	{70	29}}
{{72	-48}	{73	-48}}	{{75	-49}	{76	-49}}	{{78	-47}	{79	-47}}
{{81	-88}	{82	-88}}	{{84	-88}	{85	-88}}	{{87	48}	{88	48}}
{{90	2}	{91	2}}	{{93	98}	{94	98}}	{{96	194}	{97	194}}
{{99	153}	{100	153}}	{{102	51}	{103	51}}
{{105	-63}	{106	-63}}	{{108	-65}	{109	-65}}
{{111	-118}	{112	-118}}	{{114	-232}	{115	-232}}
{{117	-166}	{118	-166}}	{{120	-36}	{121	-36}}
{{123	83}	{124	83}}	{{126	83}	{127	83}}	{{129	78}	{130	78}}
{{132	-58}	{133	-58}}	{{135	86}	{136	86}}
{{138	-62}	{139	-62}}	{{141	-56}	{142	-56}}
{{144	90}	{145	90}}	{{147	240}	{148	240}}
{{150	160}	{151	160}}	{{153	85}	{154	85}}
{{156	85}	{157	85}}	{{159	163}	{160	163}}
{{162	245}	{163	245}}	{{165	73}	{166	73}}
{{168	69}	{169	69}}	{{171	-17}	{172	-17}}
{{174	-196}	{175	-196}}	{{177	-104}	{178	-104}}
{{180	-106}	{181	-106}}	{{183	-199}	{184	-199}}
{{186	-201}	{187	-201}}	{{189	-105}	{190	-105}}
{{192	-297}	{193	-297}}	{{195	-388}	{196	-388}}
{{198	-472}	{199	-472}}	{{201	-476}	{202	-476}}
{{204	-270}	{205	-270}}	{{207	-51}	{208	-51}}
{{210	163}	{211	163}}	{{213	163}	{214	163}}
{{216	372}	{217	372}}	{{219	712}	{220	712}}
{{222	713}	{223	713}}	{{225	583}	{226	583}}
{{228	586}	{229	586}}	{{231	230}	{232	230}}
{{234	110}	{235	110}}	{{237	370}	{238	370}}
{{240	131}	{241	131}}	{{243	-1}	{244	-1}}
{{246	-126}	{247	-126}}	{{249	117}	{250	117}}
{{252	-12}	{253	-12}}	{{255	154}	{256	154}}
{{258	-135}	{259	-135}}	{{261	-28}	{262	-28}}
{{264	-24}	{265	-24}}	{{267	130}	{268	130}}
{{270	-21}	{271	-21}}	{{273	-304}	{274	-304}}
{{276	-156}	{277	-156}}	{{279	-147}	{280	-147}}
{{282	-438}	{283	-438}}	{{285	-737}	{286	-737}}
{{288	-771}	{289	-771}}	{{291	-765}	{292	-765}}
{{294	-901}	{295	-901}}	{{297	-746}	{298	-746}}
{{300	-433}	{301	-433}}	{{303	30}	{304	30}}
{{306	182}	{307	182}}	{{309	179}	{310	179}}
{{312	-139}	{313	-139}}	{{315	-125}	{316	-125}}
{{318	-453}	{319	-453}}	{{321	-130}	{322	-130}}
{{324	-128}	{325	-128}}	{{327	201}	{328	201}}
{{330	533}	{331	533}}	{{333	362}	{334	362}}
{{336	706}	{337	706}}	{{339	702}	{340	702}}
{{342	876}	{343	876}}	{{345	700}	{346	700}}
{{348	697}	{349	697}}	{{351	522}	{352	522}}
{{354	167}	{355	167}}	{{357	172}	{358	172}}
{{360	179}	{361	179}}	{{363	363}	{364	363}}
{{366	362}	{367	362}}	{{369	176}	{370	176}}
{{372	173}	{373	173}}	{{375	-209}	{376	-209}}
{{378	-19}	{379	-19}}	{{381	-19}	{382	-19}}
{{384	-19}	{385	-19}}	{{387	48}	{388	48}}
{{390	68}	{391	68}}	{{393	456}	{394	456}}
{{396	847}	{397	847}}	{{399	596}	{400	596}}
{{402	215}	{403	215}}	{{405	421}	{406	421}}
{{408	448}	{409	448}}	{{411	250}	{412	250}}
{{414	432}	{415	432}}	{{417	874}	{418	874}}
{{420	444}	{421	444}}	{{423	420}	{424	420}}
{{426	184}	{427	184}}	{{429	190}	{430	190}}
{{432	-251}	{433	-251}}	{{435	-890}	{436	-890}}
{{438	-896}	{439	-896}}	{{441	-1118}	{442	-1118}}
{{444	-1552}	{445	-1552}}	{{447	-866}	{448	-866}}
{{450	-1080}	{451	-1080}}	{{453	-586}	{454	-586}}
{{456	-572}	{457	-572}}	{{459	-587}	{460	-587}}
{{462	-601}	{463	-601}}	{{465	-1073}	{466	-1073}}
{{468	-1075}	{469	-1075}}	{{471	-816}	{472	-816}}
{{474	-805}	{475	-805}}	{{477	-805}	{478	-805}}
{{480	-789}	{481	-789}}	{{483	-521}	{484	-521}}
{{486	-235}	{487	-235}}	{{489	-221}	{490	-221}}
{{492	-463}	{493	-463}}	{{495	-435}	{496	-435}}
{{498	-426}	{499	-426}}	{{501	-451}	{502	-451}}
{{504	-414}	{505	-414}}	{{507	-381}	{508	-381}}
{{510	-364}	{511	-364}}	{{513	-107}	{514	-107}}
{{516	420}	{517	420}}	{{519	725}	{520	725}}
{{522	461}	{523	461}}	{{525	238}	{526	238}}
{{528	790}	{529	790}}	{{531	501}	{532	501}}
{{534	524}	{535	524}}	{{537	1066}	{538	1066}}
{{540	1330}	{541	1330}}	{{543	1559}	{544	1559}}
{{546	2095}	{547	2095}}	{{549	1798}	{550	1798}}
{{552	2075}	{553	2075}}	{{555	2334}	{556	2334}}
{{558	2034}	{559	2034}}	{{561	1960}	{562	1960}}
{{564	1921}	{565	1921}}	{{567	2487}	{568	2487}}
{{570	2491}	{571	2491}}	{{573	2489}	{574	2489}}
{{576	2194}	{577	2194}}	{{579	2200}	{580	2200}}
{{582	2167}	{583	2167}}	{{585	2484}	{586	2484}}
{{588	2550}	{589	2550}}	{{591	2846}	{592	2846}}
{{594	2566}	{595	2566}}	{{597	2575}	{598	2575}}
{{600	2002}	{601	2002}}	{{603	1394}	{604	1394}}
{{606	1106}	{607	1106}}	{{609	507}	{610	507}}
{{612	515}	{613	515}}	{{615	222}	{616	222}}
{{618	-408}	{619	-408}}	{{621	-723}	{622	-723}}
{{624	-92}	{625	-92}}	{{627	-92}	{628	-92}}
{{630	232}	{631	232}}	{{633	202}	{634	202}}
{{636	858}	{637	858}}	{{639	545}	{640	545}}
{{642	-114}	{643	-114}}	{{645	-775}	{646	-775}}
{{648	-1424}	{649	-1424}}	{{651	-1451}	{652	-1451}}
{{654	-2112}	{655	-2112}}	{{657	-1783}	{658	-1783}}
{{660	-2434}	{661	-2434}}	{{663	-2778}	{664	-2778}}
{{666	-3109}	{667	-3109}}	{{669	-2437}	{670	-2437}}
{{672	-2437}	{673	-2437}}	{{675	-2448}	{676	-2448}}
{{678	-3124}	{679	-3124}}	{{681	-2443}	{682	-2443}}
{{684	-3134}	{685	-3134}}	{{687	-2441}	{688	-2441}}
{{690	-1744}	{691	-1744}}	{{693	-2094}	{694	-2094}}
{{696	-1393}	{697	-1393}}	{{699	-333}	{700	-333}}
{{702	-688}	{703	-688}}	{{705	-681}	{706	-681}}
{{708	38}	{709	38}}	{{711	-676}	{712	-676}}
{{714	44}	{715	44}}	{{717	42}	{718	42}}	{{720	45}	{721	45}}
{{723	776}	{724	776}}	{{726	776}	{727	776}}
{{729	413}	{730	413}}	{{732	399}	{733	399}}
{{735	398}	{736	398}}	{{738	772}	{739	772}}
{{741	25}	{742	25}}	{{744	-725}	{745	-725}}
{{747	27}	{748	27}}	{{750	402}	{751	402}}
{{753	394}	{754	394}}	{{756	394}	{757	394}}
{{759	18}	{760	18}}	{{762	-748}	{763	-748}}
{{765	-364}	{766	-364}}	{{768	404}	{769	404}}
{{771	975}	{772	975}}	{{774	602}	{775	602}}
{{777	247}	{778	247}}	{{780	1034}	{781	1034}}
{{783	1020}	{784	1020}}	{{786	998}	{787	998}}
{{789	1043}	{790	1043}}	{{792	1020}	{793	1020}}
{{795	1379}	{796	1379}}	{{798	1420}	{799	1420}}
{{801	1836}	{802	1836}}	{{804	2717}	{805	2717}}
{{807	2308}	{808	2308}}	{{810	1911}	{811	1911}}
{{813	1852}	{814	1852}}	{{816	1854}	{817	1854}}
{{819	2660}	{820	2660}}	{{822	1770}	{823	1770}}
{{825	1398}	{826	1398}}	{{828	586}	{829	586}}
{{831	208}	{832	208}}	{{834	-235}	{835	-235}}
{{837	176}	{838	176}}	{{840	200}	{841	200}}
{{843	1040}	{844	1040}}	{{846	1040}	{847	1040}}
{{849	1460}	{850	1460}}	{{852	1893}	{853	1893}}
{{855	1011}	{856	1011}}	{{858	930}	{859	930}}
{{861	115}	{862	115}}	{{864	8}	{865	8}}
{{867	846}	{868	846}}	{{870	1756}	{871	1756}}
{{873	2152}	{874	2152}}	{{876	1762}	{877	1762}}
{{879	2294}	{880	2294}}	{{882	1890}	{883	1890}}
{{885	969}	{886	969}}	{{888	901}	{889	901}}
{{891	916}	{892	916}}	{{894	917}	{895	917}}
{{897	976}	{898	976}}	{{900	1893}	{901	1893}}
{{903	1396}	{904	1396}}	{{906	1387}	{907	1387}}
{{909	967}	{910	967}}	{{912	940}	{913	940}}
{{915	1417}	{916	1417}}	{{918	1881}	{919	1881}}
{{921	1904}	{922	1904}}	{{924	2828}	{925	2828}}
{{927	3306}	{928	3306}}	{{930	3327}	{931	3327}}
{{933	3786}	{934	3786}}	{{936	3779}	{937	3779}}
{{939	3290}	{940	3290}}	{{942	2365}	{943	2365}}
{{945	2838}	{946	2838}}	{{948	1916}	{949	1916}}
{{951	2886}	{952	2886}}	{{954	2411}	{955	2411}}
{{957	2398}	{958	2398}}	{{960	3347}	{961	3347}}
{{963	2885}	{964	2885}}	{{966	3830}	{967	3830}}
{{969	2830}	{970	2830}}	{{972	1792}	{973	1792}}
{{975	2814}	{976	2814}}	{{978	1841}	{979	1841}}
{{981	2310}	{982	2310}}	{{984	2324}	{985	2324}}
{{987	1843}	{988	1843}}	{{990	2299}	{991	2299}}
{{993	2290}	{994	2290}}	{{996	2213}	{997	2213}}
{{999	2100}	{1000	2100}}	{{1002	1061}	{1003	1061}}
{{1005	1024}	{1006	1024}}	{{1008	2044}	{1009	2044}}
{{1011	1484}	{1012	1484}}	{{1014	968}	{1015	968}}
{{1017	443}	{1018	443}}	{{1020	437}	{1021	437}}
{{1023	-1108}	{1024	-1108}}	{{1026	-1108}	{1027	-1108}}
{{1029	-596}	{1030	-596}}	{{1032	-1605}	{1033	-1605}}
{{1035	-2624}	{1036	-2624}}	{{1038	-2573}	{1039	-2573}}
{{1041	-2611}	{1042	-2611}}	{{1044	-1537}	{1045	-1537}}
{{1047	-1013}	{1048	-1013}}	{{1050	-1522}	{1051	-1522}}
{{1053	-2031}	{1054	-2031}}	{{1056	-2031}	{1057	-2031}}
{{1059	-972}	{1060	-972}}	{{1062	-1498}	{1063	-1498}}
{{1065	-2617}	{1066	-2617}}	{{1068	-2568}	{1069	-2568}}
{{1071	-3651}	{1072	-3651}}	{{1074	-3544}	{1075	-3544}}
{{1077	-3007}	{1078	-3007}}	{{1080	-2499}	{1081	-2499}}
{{1083	-1438}	{1084	-1438}}	{{1086	-2521}	{1087	-2521}}
{{1089	-3074}	{1090	-3074}}	{{1092	-4183}	{1093	-4183}}
{{1095	-4644}	{1096	-4644}}	{{1098	-5234}	{1099	-5234}}
{{1101	-4083}	{1102	-4083}}	{{1104	-5173}	{1105	-5173}}
{{1107	-6336}	{1108	-6336}}	{{1110	-6336}	{1111	-6336}}
{{1113	-6290}	{1114	-6290}}	{{1116	-5146}	{1117	-5146}}
{{1119	-5797}	{1120	-5797}}	{{1122	-4598}	{1123	-4598}}
{{1125	-5138}	{1126	-5138}}	{{1128	-4633}	{1129	-4633}}
{{1131	-6334}	{1132	-6334}}	{{1134	-5788}	{1135	-5788}}
{{1137	-4682}	{1138	-4682}}	{{1140	-3513}	{1141	-3513}}
{{1143	-2395}	{1144	-2395}}	{{1146	-2395}	{1147	-2395}}
{{1149	-1293}	{1150	-1293}}	{{1152	-1824}	{1153	-1824}}
{{1155	-1215}	{1156	-1215}}	{{1158	-1245}	{1159	-1245}}
{{1161	-649}	{1162	-649}}	{{1164	-1871}	{1165	-1871}}
{{1167	-1235}	{1168	-1235}}	{{1170	-660}	{1171	-660}}
{{1173	-1843}	{1174	-1843}}	{{1176	-1244}	{1177	-1244}}
{{1179	-1305}	{1180	-1305}}	{{1182	-2518}	{1183	-2518}}
{{1185	-3170}	{1186	-3170}}	{{1188	-3124}	{1189	-3124}}
{{1191	-1313}	{1192	-1313}}	{{1194	-2510}	{1195	-2510}}
{{1197	-1922}	{1198	-1922}}	{{1200	-691}	{1201	-691}}
{{1203	-99}	{1204	-99}}	{{1206	527}	{1207	527}}
{{1209	489}	{1210	489}}	{{1212	1063}	{1213	1063}}
{{1215	1046}	{1216	1046}}	{{1218	1058}	{1219	1058}}
{{1221	1055}	{1222	1055}}	{{1224	-178}	{1225	-178}}
{{1227	1035}	{1228	1035}}	{{1230	956}	{1231	956}}
{{1233	339}	{1234	339}}	{{1236	397}	{1237	397}}
{{1239	-296}	{1240	-296}}	{{1242	335}	{1243	335}}
{{1245	314}	{1246	314}}	{{1248	299}	{1249	299}}
{{1251	-347}	{1252	-347}}	{{1254	903}	{1255	903}}
{{1257	2142}	{1258	2142}}	{{1260	869}	{1261	869}}
{{1263	2739}	{1264	2739}}	{{1266	1426}	{1267	1426}}
{{1269	2050}	{1270	2050}}	{{1272	1960}	{1273	1960}}
{{1275	2622}	{1276	2622}}	{{1278	1978}	{1279	1978}}
{{1281	678}	{1282	678}}	{{1284	748}	{1285	748}}
{{1287	2044}	{1288	2044}}	{{1290	2064}	{1291	2064}}
{{1293	2032}	{1294	2032}}	{{1296	2039}	{1297	2039}}
{{1299	1393}	{1300	1393}}	{{1302	1405}	{1303	1405}}
{{1305	755}	{1306	755}}	{{1308	748}	{1309	748}}
{{1311	-1230}	{1312	-1230}}	{{1314	-569}	{1315	-569}}
{{1317	784}	{1318	784}}	{{1320	830}	{1321	830}}
{{1323	793}	{1324	793}}	{{1326	1468}	{1327	1468}}
{{1329	1488}	{1330	1488}}	{{1332	2150}	{1333	2150}}
{{1335	1492}	{1336	1492}}	{{1338	1512}	{1339	1512}}
{{1341	2189}	{1342	2189}}	{{1344	2177}	{1345	2177}}
{{1347	4215}	{1348	4215}}	{{1350	4889}	{1351	4889}}
{{1353	4887}	{1354	4887}}	{{1356	6231}	{1357	6231}}
{{1359	6246}	{1360	6246}}	{{1362	4880}	{1363	4880}}
{{1365	6248}	{1366	6248}}	{{1368	6243}	{1369	6243}}
{{1371	6221}	{1372	6221}}	{{1374	4844}	{1375	4844}}
{{1377	4844}	{1378	4844}}	{{1380	4833}	{1381	4833}}
{{1383	5520}	{1384	5520}}	{{1386	6221}	{1387	6221}}
{{1389	7614}	{1390	7614}}	{{1392	7616}	{1393	7616}}
{{1395	7612}	{1396	7612}}	{{1398	7631}	{1399	7631}}
{{1401	7623}	{1402	7623}}	{{1404	9040}	{1405	9040}}
{{1407	8323}	{1408	8323}}	{{1410	8312}	{1411	8312}}
{{1413	9023}	{1414	9023}}	{{1416	9026}	{1417	9026}}
{{1419	9740}	{1420	9740}}	{{1422	9740}	{1423	9740}}
{{1425	9022}	{1426	9022}}	{{1428	7585}	{1429	7585}}
{{1431	7589}	{1432	7589}}	{{1434	6142}	{1435	6142}}
{{1437	6155}	{1438	6155}}	{{1440	6137}	{1441	6137}}
{{1443	5407}	{1444	5407}}	{{1446	4679}	{1447	4679}}
{{1449	3957}	{1450	3957}}	{{1452	3240}	{1453	3240}}
{{1455	2476}	{1456	2476}}	{{1458	3202}	{1459	3202}}
{{1461	3206}	{1462	3206}}	{{1464	1739}	{1465	1739}}
{{1467	3216}	{1468	3216}}	{{1470	3956}	{1471	3956}}
{{1473	3980}	{1474	3980}}	{{1476	3240}	{1477	3240}}
{{1479	3977}	{1480	3977}}	{{1482	3978}	{1483	3978}}
{{1485	3233}	{1486	3233}}	{{1488	3235}	{1489	3235}}
{{1491	989}	{1492	989}}	{{1494	240}	{1495	240}}
{{1497	240}	{1498	240}}	{{1500	-1262}	{1501	-1262}}
{{1503	246}	{1504	246}}	{{1506	-1260}	{1507	-1260}}
{{1509	262}	{1510	262}}	{{1512	-1252}	{1513	-1252}}
{{1515	-490}	{1516	-490}}	{{1518	1028}	{1519	1028}}
{{1521	1028}	{1522	1028}}	{{1524	1308}	{1525	1308}}
{{1527	1388}	{1528	1388}}	{{1530	2123}	{1531	2123}}
{{1533	527}	{1534	527}}	{{1536	492}	{1537	492}}
{{1539	2050}	{1540	2050}}	{{1542	2187}	{1543	2187}}
{{1545	482}	{1546	482}}	{{1548	512}	{1549	512}}
{{1551	-1089}	{1552	-1089}}	{{1554	-1064}	{1555	-1064}}
{{1557	-322}	{1558	-322}}	{{1560	-1882}	{1561	-1882}}
{{1563	-1166}	{1564	-1166}}	{{1566	-359}	{1567	-359}}
{{1569	-197}	{1570	-197}}	{{1572	-1606}	{1573	-1606}}
{{1575	-885}	{1576	-885}}	{{1578	-622}	{1579	-622}}
{{1581	-2189}	{1582	-2189}}	{{1584	-3813}	{1585	-3813}}
{{1587	-4028}	{1588	-4028}}	{{1590	-2402}	{1591	-2402}}
{{1593	-1606}	{1594	-1606}}	{{1596	-1441}	{1597	-1441}}
{{1599	-3870}	{1600	-3870}}	{{1602	-4633}	{1603	-4633}}
{{1605	-4537}	{1606	-4537}}	{{1608	-6208}	{1609	-6208}}
{{1611	-6188}	{1612	-6188}}	{{1614	-7882}	{1615	-7882}}
{{1617	-8658}	{1618	-8658}}	{{1620	-8767}	{1621	-8767}}
{{1623	-7872}	{1624	-7872}}	{{1626	-8674}	{1627	-8674}}
{{1629	-9518}	{1630	-9518}}	{{1632	-9511}	{1633	-9511}}
{{1635	-10187}	{1636	-10187}}	{{1638	-10965}	{1639	-10965}}
{{1641	-9386}	{1642	-9386}}	{{1644	-7697}	{1645	-7697}}
{{1647	-7669}	{1648	-7669}}	{{1650	-6763}	{1651	-6763}}
{{1653	-6855}	{1654	-6855}}	{{1656	-5210}	{1657	-5210}}
{{1659	-6046}	{1660	-6046}}	{{1662	-5974}	{1663	-5974}}
{{1665	-6786}	{1666	-6786}}	{{1668	-7517}	{1669	-7517}}
{{1671	-8285}	{1672	-8285}}	{{1674	-7638}	{1675	-7638}}
{{1677	-8580}	{1678	-8580}}	{{1680	-6910}	{1681	-6910}}
{{1683	-6910}	{1684	-6910}}	{{1686	-6769}	{1687	-6769}}
{{1689	-5091}	{1690	-5091}}	{{1692	-4331}	{1693	-4331}}
{{1695	-6095}	{1696	-6095}}	{{1698	-7731}	{1699	-7731}}
{{1701	-8546}	{1702	-8546}}	{{1704	-8508}	{1705	-8508}}
{{1707	-7699}	{1708	-7699}}	{{1710	-8594}	{1711	-8594}}
{{1713	-6884}	{1714	-6884}}	{{1716	-6044}	{1717	-6044}}
{{1719	-4348}	{1720	-4348}}	{{1722	-4383}	{1723	-4383}}
{{1725	-5212}	{1726	-5212}}	{{1728	-3551}	{1729	-3551}}
{{1731	-4337}	{1732	-4337}}	{{1734	-5199}	{1735	-5199}}
{{1737	-4308}	{1738	-4308}}	{{1740	-4200}	{1741	-4200}}
{{1743	-6848}	{1744	-6848}}	{{1746	-5996}	{1747	-5996}}
{{1749	-7796}	{1750	-7796}}	{{1752	-6951}	{1753	-6951}}
{{1755	-6962}	{1756	-6962}}	{{1758	-6920}	{1759	-6920}}
{{1761	-6932}	{1762	-6932}}	{{1764	-5021}	{1765	-5021}}
{{1767	-4132}	{1768	-4132}}	{{1770	-2346}	{1771	-2346}}
{{1773	-3287}	{1774	-3287}}	{{1776	-2401}	{1777	-2401}}
{{1779	-3271}	{1780	-3271}}	{{1782	-2345}	{1783	-2345}}
{{1785	-2376}	{1786	-2376}}	{{1788	-4201}	{1789	-4201}}
{{1791	-5979}	{1792	-5979}}	{{1794	-4176}	{1795	-4176}}
{{1797	-2330}	{1798	-2330}}	{{1800	-2271}	{1801	-2271}}
{{1803	-3207}	{1804	-3207}}	{{1806	-2289}	{1807	-2289}}
{{1809	-1358}	{1810	-1358}}	{{1812	-3134}	{1813	-3134}}
{{1815	-2236}	{1816	-2236}}	{{1818	-1320}	{1819	-1320}}
{{1821	513}	{1822	513}}	{{1824	493}	{1825	493}}
{{1827	-440}	{1828	-440}}	{{1830	1413}	{1831	1413}}
{{1833	-441}	{1834	-441}}	{{1836	-428}	{1837	-428}}
{{1839	2315}	{1840	2315}}	{{1842	2365}	{1843	2365}}
{{1845	3288}	{1846	3288}}	{{1848	1417}	{1849	1417}}
{{1851	2361}	{1852	2361}}	{{1854	3266}	{1855	3266}}
{{1857	3195}	{1858	3195}}	{{1860	4110}	{1861	4110}}
{{1863	3171}	{1864	3171}}	{{1866	3259}	{1867	3259}}
{{1869	1378}	{1870	1378}}	{{1872	1353}	{1873	1353}}
{{1875	1410}	{1876	1410}}	{{1878	-478}	{1879	-478}}
{{1881	-1490}	{1882	-1490}}	{{1884	414}	{1885	414}}
{{1887	-2480}	{1888	-2480}}	{{1890	-3462}	{1891	-3462}}
{{1893	-1552}	{1894	-1552}}	{{1896	386}	{1897	386}}
{{1899	532}	{1900	532}}	{{1902	-1292}	{1903	-1292}}
{{1905	-1250}	{1906	-1250}}	{{1908	-1269}	{1909	-1269}}
{{1911	-1292}	{1912	-1292}}	{{1914	-1201}	{1915	-1201}}
{{1917	-341}	{1918	-341}}	{{1920	-177}	{1921	-177}}
{{1923	1822}	{1924	1822}}	{{1926	1822}	{1927	1822}}
{{1929	3615}	{1930	3615}}	{{1932	1704}	{1933	1704}}
{{1935	1658}	{1936	1658}}	{{1938	3638}	{1939	3638}}
{{1941	5562}	{1942	5562}}	{{1944	7568}	{1945	7568}}
{{1947	6485}	{1948	6485}}	{{1950	5583}	{1951	5583}}
{{1953	4625}	{1954	4625}}	{{1956	4581}	{1957	4581}}
{{1959	5410}	{1960	5410}}	{{1962	6429}	{1963	6429}}
{{1965	6420}	{1966	6420}}	{{1968	8378}	{1969	8378}}
{{1971	8320}	{1972	8320}}	{{1974	8303}	{1975	8303}}
{{1977	9355}	{1978	9355}}	{{1980	7448}	{1981	7448}}
{{1983	10424}	{1984	10424}}	{{1986	10350}	{1987	10350}}
{{1989	9377}	{1990	9377}}	{{1992	9405}	{1993	9405}}
{{1995	10407}	{1996	10407}}	{{1998	9380}	{1999	9380}}
{{2001	7406}	{2002	7406}}	{{2004	7426}	{2005	7426}}
{{2007	7399}	{2008	7399}}	{{2010	8466}	{2011	8466}}
{{2013	6440}	{2014	6440}}	{{2016	4484}	{2017	4484}}
{{2019	5619}	{2020	5619}}	{{2022	5695}	{2023	5695}}
{{2025	5695}	{2026	5695}}	{{2028	5708}	{2029	5708}}
{{2031	6740}	{2032	6740}}	{{2034	7810}	{2035	7810}}
{{2037	5856}	{2038	5856}}	{{2040	5656}	{2041	5656}}
{{2043	7726}	{2044	7726}}	{{2046	9764}	{2047	9764}}
{{2049	11822}	{2050	11822}}	{{2052	12980}	{2053	12980}}
{{2055	9937}	{2056	9937}}	{{2058	9937}	{2059	9937}}
{{2061	10975}	{2062	10975}}	{{2064	10919}	{2065	10919}}
{{2067	9888}	{2068	9888}}	{{2070	8858}	{2071	8858}}
{{2073	10933}	{2074	10933}}	{{2076	9860}	{2077	9860}}
{{2079	12033}	{2080	12033}}	{{2082	9868}	{2083	9868}}
{{2085	7743}	{2086	7743}}	{{2088	5558}	{2089	5558}}
{{2091	4440}	{2092	4440}}	{{2094	2307}	{2095	2307}}
{{2097	3371}	{2098	3371}}	{{2100	3284}	{2101	3284}}
{{2103	6414}	{2104	6414}}	{{2106	7485}	{2107	7485}}
{{2109	6399}	{2110	6399}}	{{2112	4276}	{2113	4276}}
{{2115	2095}	{2116	2095}}	{{2118	2164}	{2119	2164}}
{{2121	2272}	{2122	2272}}	{{2124	4466}	{2125	4466}}
{{2127	6625}	{2128	6625}}	{{2130	6704}	{2131	6704}}
{{2133	5669}	{2134	5669}}	{{2136	3498}	{2137	3498}}
{{2139	2430}	{2140	2430}}	{{2142	1428}	{2143	1428}}
{{2145	1386}	{2146	1386}}	{{2148	1292}	{2149	1292}}
{{2151	2462}	{2152	2462}}	{{2154	306}	{2155	306}}
{{2157	2501}	{2158	2501}}	{{2160	2454}	{2161	2454}}
{{2163	-773}	{2164	-773}}	{{2166	270}	{2167	270}}
{{2169	1372}	{2170	1372}}	{{2172	3570}	{2173	3570}}
{{2175	5795}	{2176	5795}}	{{2178	6892}	{2179	6892}}
{{2181	6875}	{2182	6875}}	{{2184	9019}	{2185	9019}}
{{2187	9029}	{2188	9029}}	{{2190	11226}	{2191	11226}}
{{2193	11296}	{2194	11296}}	{{2196	13558}	{2197	13558}}
{{2199	13449}	{2200	13449}}	{{2202	13572}	{2203	13572}}
{{2205	12565}	{2206	12565}}	{{2208	12486}	{2209	12486}}
{{2211	12599}	{2212	12599}}	{{2214	11369}	{2215	11369}}
{{2217	13587}	{2218	13587}}	{{2220	15702}	{2221	15702}}
{{2223	13565}	{2224	13565}}	{{2226	14705}	{2227	14705}}
{{2229	17013}	{2230	17013}}	{{2232	17011}	{2233	17011}}
{{2235	15834}	{2236	15834}}	{{2238	13501}	{2239	13501}}
{{2241	12390}	{2242	12390}}	{{2244	10047}	{2245	10047}}
{{2247	11074}	{2248	11074}}	{{2250	12246}	{2251	12246}}
{{2253	12350}	{2254	12350}}	{{2256	11242}	{2257	11242}}
{{2259	13449}	{2260	13449}}	{{2262	13420}	{2263	13420}}
{{2265	13314}	{2266	13314}}	{{2268	11094}	{2269	11094}}
{{2271	9998}	{2272	9998}}	{{2274	7659}	{2275	7659}}
{{2277	7659}	{2278	7659}}	{{2280	7618}	{2281	7618}}
{{2283	6564}	{2284	6564}}	{{2286	7683}	{2287	7683}}
{{2289	5504}	{2290	5504}}	{{2292	5363}	{2293	5363}}
{{2295	3041}	{2296	3041}}	{{2298	873}	{2299	873}}
{{2301	-209}	{2302	-209}}	{{2304	987}	{2305	987}}
{{2307	4427}	{2308	4427}}	{{2310	2164}	{2311	2164}}
{{2313	937}	{2314	937}}	{{2316	860}	{2317	860}}
{{2319	2107}	{2320	2107}}	{{2322	3314}	{2323	3314}}
{{2325	4343}	{2326	4343}}	{{2328	6677}	{2329	6677}}
{{2331	6661}	{2332	6661}}	{{2334	4297}	{2335	4297}}
{{2337	4257}	{2338	4257}}	{{2340	1922}	{2341	1922}}
{{2343	615}	{2344	615}}	{{2346	654}	{2347	654}}
{{2349	-492}	{2350	-492}}	{{2352	-1660}	{2353	-1660}}
{{2355	-2747}	{2356	-2747}}	{{2358	-3856}	{2359	-3856}}
{{2361	-1500}	{2362	-1500}}	{{2364	906}	{2365	906}}
{{2367	-278}	{2368	-278}}	{{2370	2103}	{2371	2103}}
{{2373	-291}	{2374	-291}}	{{2376	980}	{2377	980}}
{{2379	-2616}	{2380	-2616}}	{{2382	-5038}	{2383	-5038}}
{{2385	-6138}	{2386	-6138}}	{{2388	-6096}	{2389	-6096}}
{{2391	-7185}	{2392	-7185}}	{{2394	-8420}	{2395	-8420}}
{{2397	-8448}	{2398	-8448}}	{{2400	-10879}	{2401	-10879}}
{{2403	-9652}	{2404	-9652}}	{{2406	-12154}	{2407	-12154}}
{{2409	-12253}	{2410	-12253}}	{{2412	-14675}	{2413	-14675}}
{{2415	-13566}	{2416	-13566}}	{{2418	-13581}	{2419	-13581}}
{{2421	-12395}	{2422	-12395}}	{{2424	-14942}	{2425	-14942}}
{{2427	-12510}	{2428	-12510}}	{{2430	-11278}	{2431	-11278}}
{{2433	-11186}	{2434	-11186}}	{{2436	-8785}	{2437	-8785}}
{{2439	-11239}	{2440	-11239}}	{{2442	-11247}	{2443	-11247}}
{{2445	-11221}	{2446	-11221}}	{{2448	-11214}	{2449	-11214}}
{{2451	-11232}	{2452	-11232}}	{{2454	-11225}	{2455	-11225}}
{{2457	-10074}	{2458	-10074}}	{{2460	-10054}	{2461	-10054}}
{{2463	-6360}	{2464	-6360}}	{{2466	-7560}	{2467	-7560}}
{{2469	-7644}	{2470	-7644}}	{{2472	-5102}	{2473	-5102}}
{{2475	-5167}	{2476	-5167}}	{{2478	-5020}	{2479	-5020}}
{{2481	-2455}	{2482	-2455}}	{{2484	-2555}	{2485	-2555}}
{{2487	-3787}	{2488	-3787}}	{{2490	-1289}	{2491	-1289}}
{{2493	-99}	{2494	-99}}	{{2496	-157}	{2497	-157}}
{{2499	2255}	{2500	2255}}	{{2502	3493}	{2503	3493}}
{{2505	976}	{2506	976}}	{{2508	921}	{2509	921}}
{{2511	884}	{2512	884}}	{{2514	817}	{2515	817}}
{{2517	3241}	{2518	3241}}	{{2520	5790}	{2521	5790}}
{{2523	3314}	{2524	3314}}	{{2526	2040}	{2527	2040}}
{{2529	2040}	{2530	2040}}	{{2532	1971}	{2533	1971}}
{{2535	1916}	{2536	1916}}	{{2538	3118}	{2539	3118}}
{{2541	1831}	{2542	1831}}	{{2544	-753}	{2545	-753}}
{{2547	-732}	{2548	-732}}	{{2550	-2032}	{2551	-2032}}
{{2553	-4559}	{2554	-4559}}	{{2556	-4579}	{2557	-4579}}
{{2559	-3251}	{2560	-3251}}	{{2562	-651}	{2563	-651}}
{{2565	639}	{2566	639}}	{{2568	3183}	{2569	3183}}
{{2571	4519}	{2572	4519}}	{{2574	5836}	{2575	5836}}
{{2577	7151}	{2578	7151}}	{{2580	7057}	{2581	7057}}
{{2583	9568}	{2584	9568}}	{{2586	6988}	{2587	6988}}
{{2589	9640}	{2590	9640}}	{{2592	9612}	{2593	9612}}
{{2595	8378}	{2596	8378}}	{{2598	7091}	{2599	7091}}
{{2601	8355}	{2602	8355}}	{{2604	10961}	{2605	10961}}
{{2607	12242}	{2608	12242}}	{{2610	10918}	{2611	10918}}
{{2613	10921}	{2614	10921}}	{{2616	13553}	{2617	13553}}
{{2619	13637}	{2620	13637}}	{{2622	13629}	{2623	13629}}
{{2625	14950}	{2626	14950}}	{{2628	14907}	{2629	14907}}
{{2631	16092}	{2632	16092}}	{{2634	13515}	{2635	13515}}
{{2637	12134}	{2638	12134}}	{{2640	12134}	{2641	12134}}
{{2643	16077}	{2644	16077}}	{{2646	16077}	{2647	16077}}
{{2649	16067}	{2650	16067}}	{{2652	17398}	{2653	17398}}
{{2655	20028}	{2656	20028}}	{{2658	17370}	{2659	17370}}
{{2661	17341}	{2662	17341}}	{{2664	15986}	{2665	15986}}
{{2667	11978}	{2668	11978}}	{{2670	14700}	{2671	14700}}
{{2673	13394}	{2674	13394}}	{{2676	12091}	{2677	12091}}
{{2679	8055}	{2680	8055}}	{{2682	9415}	{2683	9415}}
{{2685	6711}	{2686	6711}}	{{2688	4029}	{2689	4029}}
{{2691	1347}	{2692	1347}}	{{2694	-1310}	{2695	-1310}}
{{2697	-2649}	{2698	-2649}}	{{2700	-5372}	{2701	-5372}}
{{2703	-6733}	{2704	-6733}}	{{2706	-4012}	{2707	-4012}}
{{2709	-5365}	{2710	-5365}}	{{2712	-8052}	{2713	-8052}}
{{2715	-12149}	{2716	-12149}}	{{2718	-13501}	{2719	-13501}}
{{2721	-13531}	{2722	-13531}}	{{2724	-10780}	{2725	-10780}}
{{2727	-12130}	{2728	-12130}}	{{2730	-14864}	{2731	-14864}}
{{2733	-14875}	{2734	-14875}}	{{2736	-12127}	{2737	-12127}}
{{2739	-14849}	{2740	-14849}}	{{2742	-17602}	{2743	-17602}}
{{2745	-16220}	{2746	-16220}}	{{2748	-13474}	{2749	-13474}}
{{2751	-16237}	{2752	-16237}}	{{2754	-17603}	{2755	-17603}}
{{2757	-17604}	{2758	-17604}}	{{2760	-17591}	{2761	-17591}}
{{2763	-14846}	{2764	-14846}}	{{2766	-17619}	{2767	-17619}}
{{2769	-20392}	{2770	-20392}}	{{2772	-20385}	{2773	-20385}}
{{2775	-20404}	{2776	-20404}}	{{2778	-23187}	{2779	-23187}}
{{2781	-21781}	{2782	-21781}}	{{2784	-23172}	{2785	-23172}}
{{2787	-21758}	{2788	-21758}}	{{2790	-23153}	{2791	-23153}}
{{2793	-24557}	{2794	-24557}}	{{2796	-27349}	{2797	-27349}}
{{2799	-27344}	{2800	-27344}}	{{2802	-30152}	{2803	-30152}}
{{2805	-30159}	{2806	-30159}}	{{2808	-30176}	{2809	-30176}}
{{2811	-30159}	{2812	-30159}}	{{2814	-27341}	{2815	-27341}}
{{2817	-25935}	{2818	-25935}}	{{2820	-25910}	{2821	-25910}}
{{2823	-27374}	{2824	-27374}}	{{2826	-27374}	{2827	-27374}}
{{2829	-27360}	{2830	-27360}}	{{2832	-27343}	{2833	-27343}}
{{2835	-30191}	{2836	-30191}}	{{2838	-30180}	{2839	-30180}}
{{2841	-27312}	{2842	-27312}}	{{2844	-28716}	{2845	-28716}}
{{2847	-27302}	{2848	-27302}}	{{2850	-28724}	{2851	-28724}}
{{2853	-30151}	{2854	-30151}}	{{2856	-27278}	{2857	-27278}}
{{2859	-25842}	{2860	-25842}}	{{2862	-27289}	{2863	-27289}}
{{2865	-27269}	{2866	-27269}}	{{2868	-24377}	{2869	-24377}}
{{2871	-21494}	{2872	-21494}}	{{2874	-22937}	{2875	-22937}}
{{2877	-24395}	{2878	-24395}}	{{2880	-24392}	{2881	-24392}}
{{2883	-24392}	{2884	-24392}}	{{2886	-21501}	{2887	-21501}}
{{2889	-22950}	{2890	-22950}}	{{2892	-22950}	{2893	-22950}}
{{2895	-21529}	{2896	-21529}}	{{2898	-22969}	{2899	-22969}}
{{2901	-20053}	{2902	-20053}}	{{2904	-20038}	{2905	-20038}}
{{2907	-20032}	{2908	-20032}}	{{2910	-20034}	{2911	-20034}}
{{2913	-17101}	{2914	-17101}}	{{2916	-20039}	{2917	-20039}}
{{2919	-21497}	{2920	-21497}}	{{2922	-21487}	{2923	-21487}}
{{2925	-20026}	{2926	-20026}}	{{2928	-20022}	{2929	-20022}}
{{2931	-18554}	{2932	-18554}}	{{2934	-17088}	{2935	-17088}}
{{2937	-17091}	{2938	-17091}}	{{2940	-20051}	{2941	-20051}}
{{2943	-17100}	{2944	-17100}}	{{2946	-20040}	{2947	-20040}}
{{2949	-17076}	{2950	-17076}}	{{2952	-15593}	{2953	-15593}}
{{2955	-20043}	{2956	-20043}}	{{2958	-20069}	{2959	-20069}}
{{2961	-18594}	{2962	-18594}}	{{2964	-18639}	{2965	-18639}}
{{2967	-17141}	{2968	-17141}}	{{2970	-18644}	{2971	-18644}}
{{2973	-18653}	{2974	-18653}}	{{2976	-17152}	{2977	-17152}}
{{2979	-14163}	{2980	-14163}}	{{2982	-11159}	{2983	-11159}}
{{2985	-11163}	{2986	-11163}}	{{2988	-8169}	{2989	-8169}}
{{2991	-5174}	{2992	-5174}}	{{2994	-5176}	{2995	-5176}}
{{2997	-3676}	{2998	-3676}}	{{3000	-3674}	{3001	-3674}}
{{3003	-5178}	{3004	-5178}}	{{3006	-3677}	{3007	-3677}}
{{3009	-3685}	{3010	-3685}}	{{3012	-3692}	{3013	-3692}}
{{3015	-3699}	{3016	-3699}}	{{3018	-3705}	{3019	-3705}}
{{3021	-6730}	{3022	-6730}}	{{3024	-6736}	{3025	-6736}}
{{3027	-6744}	{3028	-6744}}	{{3030	-3707}	{3031	-3707}}
{{3033	-2055}	{3034	-2055}}	{{3036	-2139}	{3037	-2139}}
{{3039	-2229}	{3040	-2229}}	{{3042	-3727}	{3043	-3727}}
{{3045	-568}	{3046	-568}}	{{3048	2576}	{3049	2576}}
{{3051	1039}	{3052	1039}}	{{3054	1168}	{3055	1168}}
{{3057	850}	{3058	850}}	{{3060	-2280}	{3061	-2280}}
{{3063	-754}	{3064	-754}}	{{3066	2425}	{3067	2425}}
{{3069	1101}	{3070	1101}}	{{3072	1210}	{3073	1210}}
{{3075	1220}	{3076	1220}}	{{3078	2759}	{3079	2759}}
{{3081	-162}	{3082	-162}}	{{3084	-3279}	{3085	-3279}}
{{3087	-155}	{3088	-155}}	{{3090	-122}	{3091	-122}}
{{3093	2931}	{3094	2931}}	{{3096	5994}	{3097	5994}}
{{3099	10656}	{3100	10656}}	{{3102	13726}	{3103	13726}}
{{3105	15361}	{3106	15361}}	{{3108	18585}	{3109	18585}}
{{3111	13826}	{3112	13826}}	{{3114	15302}	{3115	15302}}
{{3117	15583}	{3118	15583}}	{{3120	15691}	{3121	15691}}
{{3123	12569}	{3124	12569}}	{{3126	11193}	{3127	11193}}
{{3129	11250}	{3130	11250}}	{{3132	11239}	{3133	11239}}
{{3135	16036}	{3136	16036}}	{{3138	12820}	{3139	12820}}
{{3141	14351}	{3142	14351}}	{{3144	17613}	{3145	17613}}
{{3147	17788}	{3148	17788}}	{{3150	19421}	{3151	19421}}
{{3153	22724}	{3154	22724}}	{{3156	22757}	{3157	22757}}
{{3159	22211}	{3160	22211}}	{{3162	25351}	{3163	25351}}
{{3165	22241}	{3166	22241}}	{{3168	22016}	{3169	22016}}
{{3171	17256}	{3172	17256}}	{{3174	19085}	{3175	19085}}
{{3177	19085}	{3178	19085}}	{{3180	17571}	{3181	17571}}
{{3183	15919}	{3184	15919}}	{{3186	15919}	{3187	15919}}
{{3189	16003}	{3190	16003}}	{{3192	15648}	{3193	15648}}
{{3195	18864}	{3196	18864}}	{{3198	22059}	{3199	22059}}
{{3201	22215}	{3202	22215}}	{{3204	22356}	{3205	22356}}
{{3207	24342}	{3208	24342}}	{{3210	24728}	{3211	24728}}
{{3213	24728}	{3214	24728}}	{{3216	28036}	{3217	28036}}
{{3219	26237}	{3220	26237}}	{{3222	24585}	{3223	24585}}
{{3225	26214}	{3226	26214}}	{{3228	29447}	{3229	29447}}
{{3231	29499}	{3232	29499}}	{{3234	31057}	{3235	31057}}
{{3237	31476}	{3238	31476}}	{{3240	34784}	{3241	34784}}
{{3243	36500}	{3244	36500}}	{{3246	33221}	{3247	33221}}
{{3249	34808}	{3250	34808}}	{{3252	33108}	{3253	33108}}
{{3255	35068}	{3256	35068}}	{{3258	33295}	{3259	33295}}
{{3261	33583}	{3262	33583}}	{{3264	33651}	{3265	33651}}
{{3267	33713}	{3268	33713}}	{{3270	36982}	{3271	36982}}
{{3273	37190}	{3274	37190}}	{{3276	38742}	{3277	38742}}
{{3279	40264}	{3280	40264}}	{{3282	40222}	{3283	40222}}
{{3285	40222}	{3286	40222}}	{{3288	40381}	{3289	40381}}
{{3291	41969}	{3292	41969}}	{{3294	43511}	{3295	43511}}
{{3297	43552}	{3298	43552}}	{{3300	40234}	{3301	40234}}
{{3303	37114}	{3304	37114}}	{{3306	40396}	{3307	40396}}
{{3309	40424}	{3310	40424}}	{{3312	37037}	{3313	37037}}
{{3315	38592}	{3316	38592}}	{{3318	41911}	{3319	41911}}
{{3321	40126}	{3322	40126}}	{{3324	36852}	{3325	36852}}
{{3327	40251}	{3328	40251}}	{{3330	38704}	{3331	38704}}
{{3333	35289}	{3334	35289}}	{{3336	35155}	{3337	35155}}
{{3339	38444}	{3340	38444}}	{{3342	38339}	{3343	38339}}
{{3345	35072}	{3346	35072}}	{{3348	31571}	{3349	31571}}
{{3351	34879}	{3352	34879}}	{{3354	38261}	{3355	38261}}
{{3357	36494}	{3358	36494}}	{{3360	33133}	{3361	33133}}
{{3363	29742}	{3364	29742}}	{{3366	31264}	{3367	31264}}
{{3369	31333}	{3370	31333}}	{{3372	27965}	{3373	27965}}
{{3375	24642}	{3376	24642}}	{{3378	24556}	{3379	24556}}
{{3381	26198}	{3382	26198}}	{{3384	26122}	{3385	26122}}
{{3387	31252}	{3388	31252}}	{{3390	31346}	{3391	31346}}
{{3393	29658}	{3394	29658}}	{{3396	29677}	{3397	29677}}
{{3399	31283}	{3400	31283}}	{{3402	32872}	{3403	32872}}
{{3405	32891}	{3406	32891}}	{{3408	29456}	{3409	29456}}
{{3411	33149}	{3412	33149}}	{{3414	29697}	{3415	29697}}
{{3417	29785}	{3418	29785}}	{{3420	33209}	{3421	33209}}
{{3423	31591}	{3424	31591}}	{{3426	29828}	{3427	29828}}
{{3429	31646}	{3430	31646}}	{{3432	33321}	{3433	33321}}
{{3435	28171}	{3436	28171}}	{{3438	29833}	{3439	29833}}
{{3441	29892}	{3442	29892}}	{{3444	33322}	{3445	33322}}
{{3447	33365}	{3448	33365}}	{{3450	31470}	{3451	31470}}
{{3453	31690}	{3454	31690}}	{{3456	31565}	{3457	31565}}
{{3459	33292}	{3460	33292}}	{{3462	29936}	{3463	29936}}
{{3465	28104}	{3466	28104}}	{{3468	27893}	{3469	27893}}
{{3471	22806}	{3472	22806}}	{{3474	24590}	{3475	24590}}
{{3477	22833}	{3478	22833}}	{{3480	21224}	{3481	21224}}
{{3483	22958}	{3484	22958}}	{{3486	22949}	{3487	22949}}
{{3489	26475}	{3490	26475}}	{{3492	22955}	{3493	22955}}
{{3495	24641}	{3496	24641}}	{{3498	28084}	{3499	28084}}
{{3501	26300}	{3502	26300}}	{{3504	26532}	{3505	26532}}
{{3507	28488}	{3508	28488}}	{{3510	28488}	{3511	28488}}
{{3513	28606}	{3514	28606}}	{{3516	25172}	{3517	25172}}
{{3519	25150}	{3520	25150}}	{{3522	25177}	{3523	25177}}
{{3525	26948}	{3526	26948}}	{{3528	23583}	{3529	23583}}
{{3531	18280}	{3532	18280}}	{{3534	18359}	{3535	18359}}
{{3537	16600}	{3538	16600}}	{{3540	13032}	{3541	13032}}
{{3543	14802}	{3544	14802}}	{{3546	16580}	{3547	16580}}
{{3549	14798}	{3550	14798}}	{{3552	16556}	{3553	16556}}
{{3555	16509}	{3556	16509}}	{{3558	12826}	{3559	12826}}
{{3561	13121}	{3562	13121}}	{{3564	13142}	{3565	13142}}
{{3567	11227}	{3568	11227}}	{{3570	11269}	{3571	11269}}
{{3573	9548}	{3574	9548}}	{{3576	11281}	{3577	11281}}
{{3579	14865}	{3580	14865}}	{{3582	13045}	{3583	13045}}
{{3585	9479}	{3586	9479}}	{{3588	9516}	{3589	9516}}
{{3591	9653}	{3592	9653}}	{{3594	6062}	{3595	6062}}
{{3597	6048}	{3598	6048}}	{{3600	5942}	{3601	5942}}
{{3603	11423}	{3604	11423}}	{{3606	7822}	{3607	7822}}
{{3609	5969}	{3610	5969}}	{{3612	7598}	{3613	7598}}
{{3615	2169}	{3616	2169}}	{{3618	407}	{3619	407}}
{{3621	-3218}	{3622	-3218}}	{{3624	-3073}	{3625	-3073}}
{{3627	-3073}	{3628	-3073}}	{{3630	-1281}	{3631	-1281}}
{{3633	-5016}	{3634	-5016}}	{{3636	-5200}	{3637	-5200}}
{{3639	-6894}	{3640	-6894}}	{{3642	-6829}	{3643	-6829}}
{{3645	-8598}	{3646	-8598}}	{{3648	-4871}	{3649	-4871}}
{{3651	-1320}	{3652	-1320}}	{{3654	516}	{3655	516}}
{{3657	-3149}	{3658	-3149}}	{{3660	-6784}	{3661	-6784}}
{{3663	-3307}	{3664	-3307}}	{{3666	325}	{3667	325}}
{{3669	4083}	{3670	4083}}	{{3672	473}	{3673	473}}
{{3675	-3045}	{3676	-3045}}	{{3678	-6812}	{3679	-6812}}
{{3681	-5084}	{3682	-5084}}	{{3684	-4857}	{3685	-4857}}
{{3687	-6355}	{3688	-6355}}	{{3690	-8197}	{3691	-8197}}
{{3693	-8040}	{3694	-8040}}	{{3696	-4481}	{3697	-4481}}
{{3699	-6166}	{3700	-6166}}	{{3702	-9961}	{3703	-9961}}
{{3705	-8037}	{3706	-8037}}	{{3708	-8040}	{3709	-8040}}
{{3711	-6092}	{3712	-6092}}	{{3714	-6130}	{3715	-6130}}
{{3717	-4317}	{3718	-4317}}	{{3720	-6049}	{3721	-6049}}
{{3723	-6270}	{3724	-6270}}	{{3726	-6270}	{3727	-6270}}
{{3729	-10011}	{3730	-10011}}	{{3732	-13758}	{3733	-13758}}
{{3735	-13625}	{3736	-13625}}	{{3738	-9758}	{3739	-9758}}
{{3741	-13533}	{3742	-13533}}	{{3744	-9698}	{3745	-9698}}
{{3747	-7612}	{3748	-7612}}	{{3750	-5678}	{3751	-5678}}
{{3753	-5678}	{3754	-5678}}	{{3756	-1927}	{3757	-1927}}
{{3759	-1857}	{3760	-1857}}	{{3762	-3822}	{3763	-3822}}
{{3765	-3977}	{3766	-3977}}	{{3768	-7754}	{3769	-7754}}
{{3771	-7776}	{3772	-7776}}	{{3774	-5805}	{3775	-5805}}
{{3777	-3794}	{3778	-3794}}	{{3780	-3832}	{3781	-3832}}
{{3783	-5791}	{3784	-5791}}	{{3786	-5897}	{3787	-5897}}
{{3789	-3929}	{3790	-3929}}	{{3792	-4094}	{3793	-4094}}
{{3795	-6254}	{3796	-6254}}	{{3798	-8150}	{3799	-8150}}
{{3801	-7884}	{3802	-7884}}	{{3804	-7722}	{3805	-7722}}
{{3807	-7582}	{3808	-7582}}	{{3810	-3943}	{3811	-3943}}
{{3813	-3767}	{3814	-3767}}	{{3816	-3936}	{3817	-3936}}
{{3819	-5998}	{3820	-5998}}	{{3822	-7985}	{3823	-7985}}
{{3825	-9940}	{3826	-9940}}	{{3828	-6039}	{3829	-6039}}
{{3831	-3775}	{3832	-3775}}	{{3834	-5782}	{3835	-5782}}
{{3837	-5741}	{3838	-5741}}	{{3840	-5692}	{3841	-5692}}
{{3843	-5990}	{3844	-5990}}	{{3846	-6296}	{3847	-6296}}
{{3849	-6388}	{3850	-6388}}	{{3852	-8370}	{3853	-8370}}
{{3855	-14312}	{3856	-14312}}	{{3858	-18087}	{3859	-18087}}
{{3861	-16093}	{3862	-16093}}	{{3864	-16021}	{3865	-16021}}
{{3867	-10142}	{3868	-10142}}	{{3870	-8153}	{3871	-8153}}
{{3873	-6286}	{3874	-6286}}	{{3876	-8401}	{3877	-8401}}
{{3879	-12571}	{3880	-12571}}	{{3882	-16481}	{3883	-16481}}
{{3885	-12578}	{3886	-12578}}	{{3888	-14518}	{3889	-14518}}
{{3891	-16618}	{3892	-16618}}	{{3894	-12756}	{3895	-12756}}
{{3897	-14763}	{3898	-14763}}	{{3900	-10810}	{3901	-10810}}
{{3903	-4991}	{3904	-4991}}	{{3906	-7050}	{3907	-7050}}
{{3909	-7121}	{3910	-7121}}	{{3912	-6885}	{3913	-6885}}
{{3915	-10855}	{3916	-10855}}	{{3918	-14698}	{3919	-14698}}
{{3921	-14886}	{3922	-14886}}	{{3924	-19041}	{3925	-19041}}
{{3927	-18834}	{3928	-18834}}	{{3930	-18910}	{3931	-18910}}
{{3933	-20962}	{3934	-20962}}	{{3936	-21063}	{3937	-21063}}
{{3939	-23107}	{3940	-23107}}	{{3942	-21256}	{3943	-21256}}
{{3945	-25374}	{3946	-25374}}	{{3948	-25325}	{3949	-25325}}
{{3951	-23415}	{3952	-23415}}	{{3954	-23494}	{3955	-23494}}
{{3957	-23758}	{3958	-23758}}	{{3960	-19646}	{3961	-19646}}
{{3963	-17919}	{3964	-17919}}	{{3966	-22033}	{3967	-22033}}
{{3969	-23883}	{3970	-23883}}	{{3972	-25844}	{3973	-25844}}
{{3975	-21839}	{3976	-21839}}	{{3978	-19880}	{3979	-19880}}
{{3981	-15890}	{3982	-15890}}	{{3984	-15911}	{3985	-15911}}
{{3987	-12240}	{3988	-12240}}	{{3990	-16166}	{3991	-16166}}
{{3993	-14148}	{3994	-14148}}	{{3996	-13844}	{3997	-13844}}
{{3999	-11760}	{4000	-11760}}	{{4002	-11792}	{4003	-11792}}
{{4005	-13698}	{4006	-13698}}	{{4008	-13850}	{4009	-13850}}
{{4011	-15915}	{4012	-15915}}	{{4014	-17919}	{4015	-17919}}
{{4017	-21811}	{4018	-21811}}	{{4020	-23696}	{4021	-23696}}
{{4023	-23740}	{4024	-23740}}	{{4026	-21852}	{4027	-21852}}
{{4029	-25926}	{4030	-25926}}	{{4032	-21905}	{4033	-21905}}
{{4035	-19835}	{4036	-19835}}	{{4038	-19904}	{4039	-19904}}
{{4041	-17781}	{4042	-17781}}	{{4044	-18277}	{4045	-18277}}
{{4047	-18297}	{4048	-18297}}	{{4050	-20257}	{4051	-20257}}
{{4053	-24351}	{4054	-24351}}	{{4056	-20320}	{4057	-20320}}
{{4059	-20355}	{4060	-20355}}	{{4062	-20515}	{4063	-20515}}
{{4065	-20548}	{4066	-20548}}	{{4068	-22575}	{4069	-22575}}
{{4071	-20349}	{4072	-20349}}	{{4074	-20220}	{4075	-20220}}
{{4077	-20220}	{4078	-20220}}	{{4080	-20244}	{4081	-20244}}
{{4083	-22226}	{4084	-22226}}	{{4086	-24144}	{4087	-24144}}
{{4089	-24144}	{4090	-24144}}	{{4092	-28326}	{4093	-28326}}
{{4095	-32456}	{4096	-32456}}	{{4098	-32585}	{4099	-32585}}
{{4101	-32478}	{4102	-32478}}	{{4104	-32435}	{4105	-32435}}
{{4107	-28297}	{4108	-28297}}	{{4110	-24036}	{4111	-24036}}
{{4113	-26063}	{4114	-26063}}	{{4116	-24117}	{4117	-24117}}
{{4119	-22166}	{4120	-22166}}	{{4122	-20023}	{4123	-20023}}
{{4125	-22143}	{4126	-22143}}	{{4128	-21808}	{4129	-21808}}
{{4131	-21784}	{4132	-21784}}	{{4134	-21938}	{4135	-21938}}
{{4137	-22123}	{4138	-22123}}	{{4140	-22275}	{4141	-22275}}
{{4143	-20230}	{4144	-20230}}	{{4146	-20367}	{4147	-20367}}
{{4149	-22539}	{4150	-22539}}	{{4152	-20407}	{4153	-20407}}
{{4155	-26605}	{4156	-26605}}	{{4158	-28659}	{4159	-28659}}
{{4161	-32792}	{4162	-32792}}	{{4164	-28593}	{4165	-28593}}
{{4167	-26351}	{4168	-26351}}	{{4170	-22272}	{4171	-22272}}
{{4173	-22309}	{4174	-22309}}	{{4176	-20243}	{4177	-20243}}
{{4179	-22366}	{4180	-22366}}	{{4182	-18186}	{4183	-18186}}
{{4185	-16020}	{4186	-16020}}	{{4188	-11938}	{4189	-11938}}
{{4191	-14171}	{4192	-14171}}	{{4194	-11905}	{4195	-11905}}
{{4197	-7775}	{4198	-7775}}	{{4200	-7852}	{4201	-7852}}
{{4203	-12097}	{4204	-12097}}	{{4206	-14038}	{4207	-14038}}
{{4209	-14111}	{4210	-14111}}	{{4212	-18298}	{4213	-18298}}
{{4215	-18194}	{4216	-18194}}	{{4218	-18372}	{4219	-18372}}
{{4221	-20584}	{4222	-20584}}	{{4224	-16356}	{4225	-16356}}
{{4227	-12038}	{4228	-12038}}	{{4230	-14265}	{4231	-14265}}
{{4233	-18499}	{4234	-18499}}	{{4236	-20596}	{4237	-20596}}
{{4239	-20575}	{4240	-20575}}	{{4242	-20957}	{4243	-20957}}
{{4245	-25149}	{4246	-25149}}	{{4248	-24924}	{4249	-24924}}
{{4251	-24793}	{4252	-24793}}	{{4254	-29117}	{4255	-29117}}
{{4257	-31146}	{4258	-31146}}	{{4260	-31089}	{4261	-31089}}
{{4263	-31059}	{4264	-31059}}	{{4266	-28936}	{4267	-28936}}
{{4269	-24801}	{4270	-24801}}	{{4272	-24665}	{4273	-24665}}
{{4275	-24725}	{4276	-24725}}	{{4278	-24885}	{4279	-24885}}
{{4281	-20583}	{4282	-20583}}	{{4284	-20627}	{4285	-20627}}
{{4287	-14148}	{4288	-14148}}	{{4290	-18483}	{4291	-18483}}
{{4293	-16365}	{4294	-16365}}	{{4296	-16052}	{4297	-16052}}
{{4299	-17974}	{4300	-17974}}	{{4302	-20134}	{4303	-20134}}
{{4305	-15765}	{4306	-15765}}	{{4308	-11574}	{4309	-11574}}
{{4311	-11564}	{4312	-11564}}	{{4314	-11520}	{4315	-11520}}
{{4317	-7087}	{4318	-7087}}	{{4320	-7006}	{4321	-7006}}
{{4323	-4861}	{4324	-4861}}	{{4326	-2659}	{4327	-2659}}
{{4329	-4943}	{4330	-4943}}	{{4332	-5023}	{4333	-5023}}
{{4335	-4886}	{4336	-4886}}	{{4338	-6976}	{4339	-6976}}
{{4341	-7378}	{4342	-7378}}	{{4344	-7780}	{4345	-7780}}
{{4347	-12211}	{4348	-12211}}	{{4350	-14364}	{4351	-14364}}
{{4353	-9915}	{4354	-9915}}	{{4356	-14225}	{4357	-14225}}
{{4359	-11971}	{4360	-11971}}	{{4362	-14274}	{4363	-14274}}
{{4365	-16316}	{4366	-16316}}	{{4368	-16235}	{4369	-16235}}
{{4371	-13953}	{4372	-13953}}	{{4374	-16205}	{4375	-16205}}
{{4377	-14016}	{4378	-14016}}	{{4380	-13843}	{4381	-13843}}
{{4383	-14066}	{4384	-14066}}	{{4386	-9448}	{4387	-9448}}
{{4389	-5161}	{4390	-5161}}	{{4392	-9627}	{4393	-9627}}
{{4395	-9410}	{4396	-9410}}	{{4398	-13740}	{4399	-13740}}
{{4401	-11387}	{4402	-11387}}	{{4404	-15949}	{4405	-15949}}
{{4407	-13500}	{4408	-13500}}	{{4410	-15678}	{4411	-15678}}
{{4413	-11207}	{4414	-11207}}	{{4416	-6663}	{4417	-6663}}
{{4419	-4551}	{4420	-4551}}	{{4422	-4479}	{4423	-4479}}
{{4425	-6749}	{4426	-6749}}	{{4428	-2220}	{4429	-2220}}
{{4431	-4398}	{4432	-4398}}	{{4434	-8852}	{4435	-8852}}
{{4437	-6613}	{4438	-6613}}	{{4440	-6440}	{4441	-6440}}
{{4443	-4221}	{4444	-4221}}	{{4446	-6310}	{4447	-6310}}
{{4449	-6615}	{4450	-6615}}	{{4452	-8725}	{4453	-8725}}
{{4455	-8700}	{4456	-8700}}	{{4458	-13190}	{4459	-13190}}
{{4461	-10995}	{4462	-10995}}	{{4464	-15603}	{4465	-15603}}
{{4467	-13146}	{4468	-13146}}	{{4470	-8739}	{4471	-8739}}
{{4473	-6631}	{4474	-6631}}	{{4476	-4448}	{4477	-4448}}
{{4479	-64}	{4480	-64}}	{{4482	-2220}	{4483	-2220}}
{{4485	-2342}	{4486	-2342}}	{{4488	2163}	{4489	2163}}
{{4491	42}	{4492	42}}	{{4494	-100}	{4495	-100}}
{{4497	-490}	{4498	-490}}	{{4500	-723}	{4501	-723}}
{{4503	1507}	{4504	1507}}	{{4506	-2833}	{4507	-2833}}
{{4509	-5186}	{4510	-5186}}	{{4512	-750}	{4513	-750}}
{{4515	-2907}	{4516	-2907}}	{{4518	-5122}	{4519	-5122}}
{{4521	-9568}	{4522	-9568}}	{{4524	-9657}	{4525	-9657}}
{{4527	-11954}	{4528	-11954}}	{{4530	-7206}	{4531	-7206}}
{{4533	-2725}	{4534	-2725}}	{{4536	1643}	{4537	1643}}
{{4539	3813}	{4540	3813}}	{{4542	3583}	{4543	3583}}
{{4545	1392}	{4546	1392}}	{{4548	1163}	{4549	1163}}
{{4551	-3418}	{4552	-3418}}	{{4554	-1084}	{4555	-1084}}
{{4557	1006}	{4558	1006}}	{{4560	855}	{4561	855}}
{{4563	809}	{4564	809}}	{{4566	-3606}	{4567	-3606}}
{{4569	-3748}	{4570	-3748}}	{{4572	-3853}	{4573	-3853}}
{{4575	789}	{4576	789}}	{{4578	5358}	{4579	5358}}
{{4581	7748}	{4582	7748}}	{{4584	3085}	{4585	3085}}
{{4587	831}	{4588	831}}	{{4590	3283}	{4591	3283}}
{{4593	3168}	{4594	3168}}	{{4596	7960}	{4597	7960}}
{{4599	5578}	{4600	5578}}	{{4602	10020}	{4603	10020}}
{{4605	5310}	{4606	5310}}	{{4608	7634}	{4609	7634}}
{{4611	5322}	{4612	5322}}	{{4614	5302}	{4615	5302}}
{{4617	3069}	{4618	3069}}	{{4620	7596}	{4621	7596}}
{{4623	5444}	{4624	5444}}	{{4626	5444}	{4627	5444}}
{{4629	10100}	{4630	10100}}	{{4632	9856}	{4633	9856}}
{{4635	10016}	{4636	10016}}	{{4638	5494}	{4639	5494}}
{{4641	5307}	{4642	5307}}	{{4644	630}	{4645	630}}
{{4647	3075}	{4648	3075}}	{{4650	861}	{4651	861}}
{{4653	-1382}	{4654	-1382}}	{{4656	-3746}	{4657	-3746}}
{{4659	-5829}	{4660	-5829}}	{{4662	-3525}	{4663	-3525}}
{{4665	-8184}	{4666	-8184}}	{{4668	-3452}	{4669	-3452}}
{{4671	-8323}	{4672	-8323}}	{{4674	-8308}	{4675	-8308}}
{{4677	-5960}	{4678	-5960}}	{{4680	-5960}	{4681	-5960}}
{{4683	-3801}	{4684	-3801}}	{{4686	972}	{4687	972}}
{{4689	3210}	{4690	3210}}	{{4692	3145}	{4693	3145}}
{{4695	3240}	{4696	3240}}	{{4698	844}	{4699	844}}
{{4701	5214}	{4702	5214}}	{{4704	5518}	{4705	5518}}
{{4707	5734}	{4708	5734}}	{{4710	10323}	{4711	10323}}
{{4713	14991}	{4714	14991}}	{{4716	15044}	{4717	15044}}
{{4719	14958}	{4720	14958}}	{{4722	10400}	{4723	10400}}
{{4725	7879}	{4726	7879}}	{{4728	7955}	{4729	7955}}
{{4731	5667}	{4732	5667}}	{{4734	3374}	{4735	3374}}
{{4737	8241}	{4738	8241}}	{{4740	8060}	{4741	8060}}
{{4743	12954}	{4744	12954}}	{{4746	12659}	{4747	12659}}
{{4749	17405}	{4750	17405}}	{{4752	15021}	{4753	15021}}
{{4755	14809}	{4756	14809}}	{{4758	19744}	{4759	19744}}
{{4761	17478}	{4762	17478}}	{{4764	22168}	{4765	22168}}
{{4767	24483}	{4768	24483}}	{{4770	26784}	{4771	26784}}
{{4773	26857}	{4774	26857}}	{{4776	29260}	{4777	29260}}
{{4779	34019}	{4780	34019}}	{{4782	34246}	{4783	34246}}
{{4785	34299}	{4786	34299}}	{{4788	34136}	{4789	34136}}
{{4791	31876}	{4792	31876}}	{{4794	32174}	{4795	32174}}
{{4797	29741}	{4798	29741}}	{{4800	29907}	{4801	29907}}
{{4803	29937}	{4804	29937}}	{{4806	29937}	{4807	29937}}
{{4809	25199}	{4810	25199}}	{{4812	30074}	{4813	30074}}
{{4815	25250}	{4816	25250}}	{{4818	25256}	{4819	25256}}
{{4821	30086}	{4822	30086}}	{{4824	29779}	{4825	29779}}
{{4827	29893}	{4828	29893}}	{{4830	29743}	{4831	29743}}
{{4833	27231}	{4834	27231}}	{{4836	32009}	{4837	32009}}
{{4839	34604}	{4840	34604}}	{{4842	37174}	{4843	37174}}
{{4845	41986}	{4846	41986}}	{{4848	46806}	{4849	46806}}
{{4851	49080}	{4852	49080}}	{{4854	49071}	{4855	49071}}
{{4857	53831}	{4858	53831}}	{{4860	53602}	{4861	53602}}
{{4863	56237}	{4864	56237}}	{{4866	51328}	{4867	51328}}
{{4869	53848}	{4870	53848}}	{{4872	48931}	{4873	48931}}
{{4875	53886}	{4876	53886}}	{{4878	51430}	{4879	51430}}
{{4881	51318}	{4882	51318}}	{{4884	56204}	{4885	56204}}
{{4887	56146}	{4888	56146}}	{{4890	56063}	{4891	56063}}
{{4893	56178}	{4894	56178}}	{{4896	56340}	{4897	56340}}
{{4899	54085}	{4900	54085}}	{{4902	56605}	{4903	56605}}
{{4905	54249}	{4906	54249}}	{{4908	54107}	{4909	54107}}
{{4911	51909}	{4912	51909}}	{{4914	51909}	{4915	51909}}
{{4917	51682}	{4918	51682}}	{{4920	51618}	{4921	51618}}
{{4923	46580}	{4924	46580}}	{{4926	44214}	{4927	44214}}
{{4929	44255}	{4930	44255}}	{{4932	44360}	{4933	44360}}
{{4935	46795}	{4936	46795}}	{{4938	41697}	{4939	41697}}
{{4941	44106}	{4942	44106}}	{{4944	39042}	{4945	39042}}
{{4947	36767}	{4948	36767}}	{{4950	36767}	{4951	36767}}
{{4953	31851}	{4954	31851}}	{{4956	36802}	{4957	36802}}
{{4959	31836}	{4960	31836}}	{{4962	29314}	{4963	29314}}
{{4965	29398}	{4966	29398}}	{{4968	24368}	{4969	24368}}
{{4971	26733}	{4972	26733}}	{{4974	21797}	{4975	21797}}
{{4977	21797}	{4978	21797}}	{{4980	21868}	{4981	21868}}
{{4983	19497}	{4984	19497}}	{{4986	21941}	{4987	21941}}
{{4989	22027}	{4990	22027}}	{{4992	17086}	{4993	17086}}
{{4995	12092}	{4996	12092}}	{{4998	14630}	{4999	14630}}
{{5001	14676}	{5002	14676}}	{{5004	9683}	{5005	9683}}
{{5007	17117}	{5008	17117}}	{{5010	17137}	{5011	17137}}
{{5013	14622}	{5014	14622}}	{{5016	9597}	{5017	9597}}
{{5019	7143}	{5020	7143}}	{{5022	4635}	{5023	4635}}
{{5025	2273}	{5026	2273}}	{{5028	2316}	{5029	2316}}
{{5031	2302}	{5032	2302}}	{{5034	2463}	{5035	2463}}
{{5037	-2492}	{5038	-2492}}	{{5040	-7514}	{5041	-7514}}
{{5043	-5087}	{5044	-5087}}	{{5046	-2491}	{5047	-2491}}
{{5049	-2491}	{5050	-2491}}	{{5052	-4935}	{5053	-4935}}
{{5055	-4961}	{5056	-4961}}	{{5058	-2335}	{5059	-2335}}
{{5061	-7455}	{5062	-7455}}	{{5064	-2418}	{5065	-2418}}
{{5067	-2327}	{5068	-2327}}	{{5070	228}	{5071	228}}
{{5073	403}	{5074	403}}	{{5076	-2097}	{5077	-2097}}
{{5079	374}	{5080	374}}	{{5082	-2165}	{5083	-2165}}
{{5085	-4781}	{5086	-4781}}	{{5088	-4764}	{5089	-4764}}
{{5091	-2481}	{5092	-2481}}	{{5094	42}	{5095	42}}
{{5097	5116}	{5098	5116}}	{{5100	5079}	{5101	5079}}
{{5103	5028}	{5104	5028}}	{{5106	10208}	{5107	10208}}
{{5109	5136}	{5110	5136}}	{{5112	10230}	{5113	10230}}
{{5115	12574}	{5116	12574}}	{{5118	7559}	{5119	7559}}
{{5121	4900}	{5122	4900}}	{{5124	4922}	{5125	4922}}
{{5127	4780}	{5128	4780}}	{{5130	7449}	{5131	7449}}
{{5133	7234}	{5134	7234}}	{{5136	2168}	{5137	2168}}
{{5139	2206}	{5140	2206}}	{{5142	2190}	{5143	2190}}
{{5145	4802}	{5146	4802}}	{{5148	-396}	{5149	-396}}
{{5151	-378}	{5152	-378}}	{{5154	-5500}	{5155	-5500}}
{{5157	-2887}	{5158	-2887}}	{{5160	-2782}	{5161	-2782}}
{{5163	2}	{5164	2}}	{{5166	2609}	{5167	2609}}
{{5169	2692}	{5170	2692}}	{{5172	2487}	{5173	2487}}
{{5175	2509}	{5176	2509}}	{{5178	2573}	{5179	2573}}
{{5181	-2601}	{5182	-2601}}	{{5184	2528}	{5185	2528}}
{{5187	5136}	{5188	5136}}	{{5190	5032}	{5191	5032}}
{{5193	7696}	{5194	7696}}	{{5196	10324}	{5197	10324}}
{{5199	7667}	{5200	7667}}	{{5202	10430}	{5203	10430}}
{{5205	7813}	{5206	7813}}	{{5208	7791}	{5209	7791}}
{{5211	2583}	{5212	2583}}	{{5214	7786}	{5215	7786}}
{{5217	2615}	{5218	2615}}	{{5220	7834}	{5221	7834}}
{{5223	10295}	{5224	10295}}	{{5226	12823}	{5227	12823}}
{{5229	10117}	{5230	10117}}	{{5232	4942}	{5233	4942}}
{{5235	2505}	{5236	2505}}	{{5238	-160}	{5239	-160}}
{{5241	2512}	{5242	2512}}	{{5244	5009}	{5245	5009}}
{{5247	4899}	{5248	4899}}	{{5250	7572}	{5251	7572}}
{{5253	7403}	{5254	7403}}	{{5256	7402}	{5257	7402}}
{{5259	10138}	{5260	10138}}	{{5262	4829}	{5263	4829}}
{{5265	7476}	{5266	7476}}	{{5268	12714}	{5269	12714}}
{{5271	15344}	{5272	15344}}	{{5274	12690}	{5275	12690}}
{{5277	15315}	{5278	15315}}	{{5280	15277}	{5281	15277}}
{{5283	10019}	{5284	10019}}	{{5286	4612}	{5287	4612}}
{{5289	4434}	{5290	4434}}	{{5292	1711}	{5293	1711}}
{{5295	4254}	{5296	4254}}	{{5298	-1138}	{5299	-1138}}}
