# Supplementary material for: On Some Properties of the Hofstadter–Mertens Function
Source: Hindawi journal article supplement (doi:10.1155/2020/1816756), 2020-09-15
Supplement: f1 [file 1816756.f1.zip › Figure4.dat]

    {{{0, 0}, {1, 0}}, {{3, -2}, {4, -2}}, {{6, -1}, {7, -1}}, 
     {{9, -6}, {10, -6}}, {{12, -6}, {13, -6}}, {{15, 4}, {16, 4}}, 
     {{18, -6}, {19, -6}}, {{21, -5}, {22, -5}}, {{24, -5}, {25, -5}}, 
     {{27, 9}, {28, 9}}, {{30, -23}, {31, -23}}, {{33, -26}, {34, -26}}, 
     {{36, 15}, {37, 15}}, {{39, 38}, {40, 38}}, {{42, -8}, {43, -8}}, 
     {{45, -32}, {46, -32}}, {{48, -32}, {49, -32}}, {{51, -2}, {52, -2}}, 
     {{54, -28}, {55, -28}}, {{57, 34}, {58, 34}}, {{60, 32}, {61, 32}}, 
     {{63, 32}, {64, 32}}, {{66, 25}, {67, 25}}, {{69, 29}, {70, 29}}, 
     {{72, -48}, {73, -48}}, {{75, -49}, {76, -49}}, {{78, -47}, {79, -47}}, 
     {{81, -88}, {82, -88}}, {{84, -88}, {85, -88}}, {{87, 48}, {88, 48}}, 
     {{90, 2}, {91, 2}}, {{93, 98}, {94, 98}}, {{96, 194}, {97, 194}}, 
     {{99, 153}, {100, 153}}, {{102, 51}, {103, 51}}, 
     {{105, -63}, {106, -63}}, {{108, -65}, {109, -65}}, 
     {{111, -118}, {112, -118}}, {{114, -232}, {115, -232}}, 
     {{117, -166}, {118, -166}}, {{120, -36}, {121, -36}}, 
     {{123, 83}, {124, 83}}, {{126, 83}, {127, 83}}, {{129, 78}, {130, 78}}, 
     {{132, -58}, {133, -58}}, {{135, 86}, {136, 86}}, 
     {{138, -62}, {139, -62}}, {{141, -56}, {142, -56}}, 
     {{144, 90}, {145, 90}}, {{147, 240}, {148, 240}}, 
     {{150, 160}, {151, 160}}, {{153, 85}, {154, 85}}, 
     {{156, 85}, {157, 85}}, {{159, 163}, {160, 163}}, 
     {{162, 245}, {163, 245}}, {{165, 73}, {166, 73}}, 
     {{168, 69}, {169, 69}}, {{171, -17}, {172, -17}}, 
     {{174, -196}, {175, -196}}, {{177, -104}, {178, -104}}, 
     {{180, -106}, {181, -106}}, {{183, -199}, {184, -199}}, 
     {{186, -201}, {187, -201}}, {{189, -105}, {190, -105}}, 
     {{192, -297}, {193, -297}}, {{195, -388}, {196, -388}}, 
     {{198, -472}, {199, -472}}, {{201, -476}, {202, -476}}, 
     {{204, -270}, {205, -270}}, {{207, -51}, {208, -51}}, 
     {{210, 163}, {211, 163}}, {{213, 163}, {214, 163}}, 
     {{216, 372}, {217, 372}}, {{219, 712}, {220, 712}}, 
     {{222, 713}, {223, 713}}, {{225, 583}, {226, 583}}, 
     {{228, 586}, {229, 586}}, {{231, 230}, {232, 230}}, 
     {{234, 110}, {235, 110}}, {{237, 370}, {238, 370}}, 
     {{240, 131}, {241, 131}}, {{243, -1}, {244, -1}}, 
     {{246, -126}, {247, -126}}, {{249, 117}, {250, 117}}, 
     {{252, -12}, {253, -12}}, {{255, 154}, {256, 154}}, 
     {{258, -135}, {259, -135}}, {{261, -28}, {262, -28}}, 
     {{264, -24}, {265, -24}}, {{267, 130}, {268, 130}}, 
     {{270, -21}, {271, -21}}, {{273, -304}, {274, -304}}, 
     {{276, -156}, {277, -156}}, {{279, -147}, {280, -147}}, 
     {{282, -438}, {283, -438}}, {{285, -737}, {286, -737}}, 
     {{288, -771}, {289, -771}}, {{291, -765}, {292, -765}}, 
     {{294, -901}, {295, -901}}, {{297, -746}, {298, -746}}, 
     {{300, -433}, {301, -433}}, {{303, 30}, {304, 30}}, 
     {{306, 182}, {307, 182}}, {{309, 179}, {310, 179}}, 
     {{312, -139}, {313, -139}}, {{315, -125}, {316, -125}}, 
     {{318, -453}, {319, -453}}, {{321, -130}, {322, -130}}, 
     {{324, -128}, {325, -128}}, {{327, 201}, {328, 201}}, 
     {{330, 533}, {331, 533}}, {{333, 362}, {334, 362}}, 
     {{336, 706}, {337, 706}}, {{339, 702}, {340, 702}}, 
     {{342, 876}, {343, 876}}, {{345, 700}, {346, 700}}, 
     {{348, 697}, {349, 697}}, {{351, 522}, {352, 522}}, 
     {{354, 167}, {355, 167}}, {{357, 172}, {358, 172}}, 
     {{360, 179}, {361, 179}}, {{363, 363}, {364, 363}}, 
     {{366, 362}, {367, 362}}, {{369, 176}, {370, 176}}, 
     {{372, 173}, {373, 173}}, {{375, -209}, {376, -209}}, 
     {{378, -19}, {379, -19}}, {{381, -19}, {382, -19}}, 
     {{384, -19}, {385, -19}}, {{387, 48}, {388, 48}}, 
     {{390, 68}, {391, 68}}, {{393, 456}, {394, 456}}, 
     {{396, 847}, {397, 847}}, {{399, 596}, {400, 596}}, 
     {{402, 215}, {403, 215}}, {{405, 421}, {406, 421}}, 
     {{408, 448}, {409, 448}}, {{411, 250}, {412, 250}}, 
     {{414, 432}, {415, 432}}, {{417, 874}, {418, 874}}, 
     {{420, 444}, {421, 444}}, {{423, 420}, {424, 420}}, 
     {{426, 184}, {427, 184}}, {{429, 190}, {430, 190}}, 
     {{432, -251}, {433, -251}}, {{435, -890}, {436, -890}}, 
     {{438, -896}, {439, -896}}, {{441, -1118}, {442, -1118}}, 
     {{444, -1552}, {445, -1552}}, {{447, -866}, {448, -866}}, 
     {{450, -1080}, {451, -1080}}, {{453, -586}, {454, -586}}, 
     {{456, -572}, {457, -572}}, {{459, -587}, {460, -587}}, 
     {{462, -601}, {463, -601}}, {{465, -1073}, {466, -1073}}, 
     {{468, -1075}, {469, -1075}}, {{471, -816}, {472, -816}}, 
     {{474, -805}, {475, -805}}, {{477, -805}, {478, -805}}, 
     {{480, -789}, {481, -789}}, {{483, -521}, {484, -521}}, 
     {{486, -235}, {487, -235}}, {{489, -221}, {490, -221}}, 
     {{492, -463}, {493, -463}}, {{495, -435}, {496, -435}}, 
     {{498, -426}, {499, -426}}, {{501, -451}, {502, -451}}, 
     {{504, -414}, {505, -414}}, {{507, -381}, {508, -381}}, 
     {{510, -364}, {511, -364}}, {{513, -107}, {514, -107}}, 
     {{516, 420}, {517, 420}}, {{519, 725}, {520, 725}}, 
     {{522, 461}, {523, 461}}, {{525, 238}, {526, 238}}, 
     {{528, 790}, {529, 790}}, {{531, 501}, {532, 501}}, 
     {{534, 524}, {535, 524}}, {{537, 1066}, {538, 1066}}, 
     {{540, 1330}, {541, 1330}}, {{543, 1559}, {544, 1559}}, 
     {{546, 2095}, {547, 2095}}, {{549, 1798}, {550, 1798}}, 
     {{552, 2075}, {553, 2075}}, {{555, 2334}, {556, 2334}}, 
     {{558, 2034}, {559, 2034}}, {{561, 1960}, {562, 1960}}, 
     {{564, 1921}, {565, 1921}}, {{567, 2487}, {568, 2487}}, 
     {{570, 2491}, {571, 2491}}, {{573, 2489}, {574, 2489}}, 
     {{576, 2194}, {577, 2194}}, {{579, 2200}, {580, 2200}}, 
     {{582, 2167}, {583, 2167}}, {{585, 2484}, {586, 2484}}, 
     {{588, 2550}, {589, 2550}}, {{591, 2846}, {592, 2846}}, 
     {{594, 2566}, {595, 2566}}, {{597, 2575}, {598, 2575}}, 
     {{600, 2002}, {601, 2002}}, {{603, 1394}, {604, 1394}}, 
     {{606, 1106}, {607, 1106}}, {{609, 507}, {610, 507}}, 
     {{612, 515}, {613, 515}}, {{615, 222}, {616, 222}}, 
     {{618, -408}, {619, -408}}, {{621, -723}, {622, -723}}, 
     {{624, -92}, {625, -92}}, {{627, -92}, {628, -92}}, 
     {{630, 232}, {631, 232}}, {{633, 202}, {634, 202}}, 
     {{636, 858}, {637, 858}}, {{639, 545}, {640, 545}}, 
     {{642, -114}, {643, -114}}, {{645, -775}, {646, -775}}, 
     {{648, -1424}, {649, -1424}}, {{651, -1451}, {652, -1451}}, 
     {{654, -2112}, {655, -2112}}, {{657, -1783}, {658, -1783}}, 
     {{660, -2434}, {661, -2434}}, {{663, -2778}, {664, -2778}}, 
     {{666, -3109}, {667, -3109}}, {{669, -2437}, {670, -2437}}, 
     {{672, -2437}, {673, -2437}}, {{675, -2448}, {676, -2448}}, 
     {{678, -3124}, {679, -3124}}, {{681, -2443}, {682, -2443}}, 
     {{684, -3134}, {685, -3134}}, {{687, -2441}, {688, -2441}}, 
     {{690, -1744}, {691, -1744}}, {{693, -2094}, {694, -2094}}, 
     {{696, -1393}, {697, -1393}}, {{699, -333}, {700, -333}}, 
     {{702, -688}, {703, -688}}, {{705, -681}, {706, -681}}, 
     {{708, 38}, {709, 38}}, {{711, -676}, {712, -676}}, 
     {{714, 44}, {715, 44}}, {{717, 42}, {718, 42}}, {{720, 45}, {721, 45}}, 
     {{723, 776}, {724, 776}}, {{726, 776}, {727, 776}}, 
     {{729, 413}, {730, 413}}, {{732, 399}, {733, 399}}, 
     {{735, 398}, {736, 398}}, {{738, 772}, {739, 772}}, 
     {{741, 25}, {742, 25}}, {{744, -725}, {745, -725}}, 
     {{747, 27}, {748, 27}}, {{750, 402}, {751, 402}}, 
     {{753, 394}, {754, 394}}, {{756, 394}, {757, 394}}, 
     {{759, 18}, {760, 18}}, {{762, -748}, {763, -748}}, 
     {{765, -364}, {766, -364}}, {{768, 404}, {769, 404}}, 
     {{771, 975}, {772, 975}}, {{774, 602}, {775, 602}}, 
     {{777, 247}, {778, 247}}, {{780, 1034}, {781, 1034}}, 
     {{783, 1020}, {784, 1020}}, {{786, 998}, {787, 998}}, 
     {{789, 1043}, {790, 1043}}, {{792, 1020}, {793, 1020}}, 
     {{795, 1379}, {796, 1379}}, {{798, 1420}, {799, 1420}}, 
     {{801, 1836}, {802, 1836}}, {{804, 2717}, {805, 2717}}, 
     {{807, 2308}, {808, 2308}}, {{810, 1911}, {811, 1911}}, 
     {{813, 1852}, {814, 1852}}, {{816, 1854}, {817, 1854}}, 
     {{819, 2660}, {820, 2660}}, {{822, 1770}, {823, 1770}}, 
     {{825, 1398}, {826, 1398}}, {{828, 586}, {829, 586}}, 
     {{831, 208}, {832, 208}}, {{834, -235}, {835, -235}}, 
     {{837, 176}, {838, 176}}, {{840, 200}, {841, 200}}, 
     {{843, 1040}, {844, 1040}}, {{846, 1040}, {847, 1040}}, 
     {{849, 1460}, {850, 1460}}, {{852, 1893}, {853, 1893}}, 
     {{855, 1011}, {856, 1011}}, {{858, 930}, {859, 930}}, 
     {{861, 115}, {862, 115}}, {{864, 8}, {865, 8}}, 
     {{867, 846}, {868, 846}}, {{870, 1756}, {871, 1756}}, 
     {{873, 2152}, {874, 2152}}, {{876, 1762}, {877, 1762}}, 
     {{879, 2294}, {880, 2294}}, {{882, 1890}, {883, 1890}}, 
     {{885, 969}, {886, 969}}, {{888, 901}, {889, 901}}, 
     {{891, 916}, {892, 916}}, {{894, 917}, {895, 917}}, 
     {{897, 976}, {898, 976}}, {{900, 1893}, {901, 1893}}, 
     {{903, 1396}, {904, 1396}}, {{906, 1387}, {907, 1387}}, 
     {{909, 967}, {910, 967}}, {{912, 940}, {913, 940}}, 
     {{915, 1417}, {916, 1417}}, {{918, 1881}, {919, 1881}}, 
     {{921, 1904}, {922, 1904}}, {{924, 2828}, {925, 2828}}, 
     {{927, 3306}, {928, 3306}}, {{930, 3327}, {931, 3327}}, 
     {{933, 3786}, {934, 3786}}, {{936, 3779}, {937, 3779}}, 
     {{939, 3290}, {940, 3290}}, {{942, 2365}, {943, 2365}}, 
     {{945, 2838}, {946, 2838}}, {{948, 1916}, {949, 1916}}, 
     {{951, 2886}, {952, 2886}}, {{954, 2411}, {955, 2411}}, 
     {{957, 2398}, {958, 2398}}, {{960, 3347}, {961, 3347}}, 
     {{963, 2885}, {964, 2885}}, {{966, 3830}, {967, 3830}}, 
     {{969, 2830}, {970, 2830}}, {{972, 1792}, {973, 1792}}, 
     {{975, 2814}, {976, 2814}}, {{978, 1841}, {979, 1841}}, 
     {{981, 2310}, {982, 2310}}, {{984, 2324}, {985, 2324}}, 
     {{987, 1843}, {988, 1843}}, {{990, 2299}, {991, 2299}}, 
     {{993, 2290}, {994, 2290}}, {{996, 2213}, {997, 2213}}, 
     {{999, 2100}, {1000, 2100}}, {{1002, 1061}, {1003, 1061}}, 
     {{1005, 1024}, {1006, 1024}}, {{1008, 2044}, {1009, 2044}}, 
     {{1011, 1484}, {1012, 1484}}, {{1014, 968}, {1015, 968}}, 
     {{1017, 443}, {1018, 443}}, {{1020, 437}, {1021, 437}}, 
     {{1023, -1108}, {1024, -1108}}, {{1026, -1108}, {1027, -1108}}, 
     {{1029, -596}, {1030, -596}}, {{1032, -1605}, {1033, -1605}}, 
     {{1035, -2624}, {1036, -2624}}, {{1038, -2573}, {1039, -2573}}, 
     {{1041, -2611}, {1042, -2611}}, {{1044, -1537}, {1045, -1537}}, 
     {{1047, -1013}, {1048, -1013}}, {{1050, -1522}, {1051, -1522}}, 
     {{1053, -2031}, {1054, -2031}}, {{1056, -2031}, {1057, -2031}}, 
     {{1059, -972}, {1060, -972}}, {{1062, -1498}, {1063, -1498}}, 
     {{1065, -2617}, {1066, -2617}}, {{1068, -2568}, {1069, -2568}}, 
     {{1071, -3651}, {1072, -3651}}, {{1074, -3544}, {1075, -3544}}, 
     {{1077, -3007}, {1078, -3007}}, {{1080, -2499}, {1081, -2499}}, 
     {{1083, -1438}, {1084, -1438}}, {{1086, -2521}, {1087, -2521}}, 
     {{1089, -3074}, {1090, -3074}}, {{1092, -4183}, {1093, -4183}}, 
     {{1095, -4644}, {1096, -4644}}, {{1098, -5234}, {1099, -5234}}, 
     {{1101, -4083}, {1102, -4083}}, {{1104, -5173}, {1105, -5173}}, 
     {{1107, -6336}, {1108, -6336}}, {{1110, -6336}, {1111, -6336}}, 
     {{1113, -6290}, {1114, -6290}}, {{1116, -5146}, {1117, -5146}}, 
     {{1119, -5797}, {1120, -5797}}, {{1122, -4598}, {1123, -4598}}, 
     {{1125, -5138}, {1126, -5138}}, {{1128, -4633}, {1129, -4633}}, 
     {{1131, -6334}, {1132, -6334}}, {{1134, -5788}, {1135, -5788}}, 
     {{1137, -4682}, {1138, -4682}}, {{1140, -3513}, {1141, -3513}}, 
     {{1143, -2395}, {1144, -2395}}, {{1146, -2395}, {1147, -2395}}, 
     {{1149, -1293}, {1150, -1293}}, {{1152, -1824}, {1153, -1824}}, 
     {{1155, -1215}, {1156, -1215}}, {{1158, -1245}, {1159, -1245}}, 
     {{1161, -649}, {1162, -649}}, {{1164, -1871}, {1165, -1871}}, 
     {{1167, -1235}, {1168, -1235}}, {{1170, -660}, {1171, -660}}, 
     {{1173, -1843}, {1174, -1843}}, {{1176, -1244}, {1177, -1244}}, 
     {{1179, -1305}, {1180, -1305}}, {{1182, -2518}, {1183, -2518}}, 
     {{1185, -3170}, {1186, -3170}}, {{1188, -3124}, {1189, -3124}}, 
     {{1191, -1313}, {1192, -1313}}, {{1194, -2510}, {1195, -2510}}, 
     {{1197, -1922}, {1198, -1922}}, {{1200, -691}, {1201, -691}}, 
     {{1203, -99}, {1204, -99}}, {{1206, 527}, {1207, 527}}, 
     {{1209, 489}, {1210, 489}}, {{1212, 1063}, {1213, 1063}}, 
     {{1215, 1046}, {1216, 1046}}, {{1218, 1058}, {1219, 1058}}, 
     {{1221, 1055}, {1222, 1055}}, {{1224, -178}, {1225, -178}}, 
     {{1227, 1035}, {1228, 1035}}, {{1230, 956}, {1231, 956}}, 
     {{1233, 339}, {1234, 339}}, {{1236, 397}, {1237, 397}}, 
     {{1239, -296}, {1240, -296}}, {{1242, 335}, {1243, 335}}, 
     {{1245, 314}, {1246, 314}}, {{1248, 299}, {1249, 299}}, 
     {{1251, -347}, {1252, -347}}, {{1254, 903}, {1255, 903}}, 
     {{1257, 2142}, {1258, 2142}}, {{1260, 869}, {1261, 869}}, 
     {{1263, 2739}, {1264, 2739}}, {{1266, 1426}, {1267, 1426}}, 
     {{1269, 2050}, {1270, 2050}}, {{1272, 1960}, {1273, 1960}}, 
     {{1275, 2622}, {1276, 2622}}, {{1278, 1978}, {1279, 1978}}, 
     {{1281, 678}, {1282, 678}}, {{1284, 748}, {1285, 748}}, 
     {{1287, 2044}, {1288, 2044}}, {{1290, 2064}, {1291, 2064}}, 
     {{1293, 2032}, {1294, 2032}}, {{1296, 2039}, {1297, 2039}}, 
     {{1299, 1393}, {1300, 1393}}, {{1302, 1405}, {1303, 1405}}, 
     {{1305, 755}, {1306, 755}}, {{1308, 748}, {1309, 748}}, 
     {{1311, -1230}, {1312, -1230}}, {{1314, -569}, {1315, -569}}, 
     {{1317, 784}, {1318, 784}}, {{1320, 830}, {1321, 830}}, 
     {{1323, 793}, {1324, 793}}, {{1326, 1468}, {1327, 1468}}, 
     {{1329, 1488}, {1330, 1488}}, {{1332, 2150}, {1333, 2150}}, 
     {{1335, 1492}, {1336, 1492}}, {{1338, 1512}, {1339, 1512}}, 
     {{1341, 2189}, {1342, 2189}}, {{1344, 2177}, {1345, 2177}}, 
     {{1347, 4215}, {1348, 4215}}, {{1350, 4889}, {1351, 4889}}, 
     {{1353, 4887}, {1354, 4887}}, {{1356, 6231}, {1357, 6231}}, 
     {{1359, 6246}, {1360, 6246}}, {{1362, 4880}, {1363, 4880}}, 
     {{1365, 6248}, {1366, 6248}}, {{1368, 6243}, {1369, 6243}}, 
     {{1371, 6221}, {1372, 6221}}, {{1374, 4844}, {1375, 4844}}, 
     {{1377, 4844}, {1378, 4844}}, {{1380, 4833}, {1381, 4833}}, 
     {{1383, 5520}, {1384, 5520}}, {{1386, 6221}, {1387, 6221}}, 
     {{1389, 7614}, {1390, 7614}}, {{1392, 7616}, {1393, 7616}}, 
     {{1395, 7612}, {1396, 7612}}, {{1398, 7631}, {1399, 7631}}, 
     {{1401, 7623}, {1402, 7623}}, {{1404, 9040}, {1405, 9040}}, 
     {{1407, 8323}, {1408, 8323}}, {{1410, 8312}, {1411, 8312}}, 
     {{1413, 9023}, {1414, 9023}}, {{1416, 9026}, {1417, 9026}}, 
     {{1419, 9740}, {1420, 9740}}, {{1422, 9740}, {1423, 9740}}, 
     {{1425, 9022}, {1426, 9022}}, {{1428, 7585}, {1429, 7585}}, 
     {{1431, 7589}, {1432, 7589}}, {{1434, 6142}, {1435, 6142}}, 
     {{1437, 6155}, {1438, 6155}}, {{1440, 6137}, {1441, 6137}}, 
     {{1443, 5407}, {1444, 5407}}, {{1446, 4679}, {1447, 4679}}, 
     {{1449, 3957}, {1450, 3957}}, {{1452, 3240}, {1453, 3240}}, 
     {{1455, 2476}, {1456, 2476}}, {{1458, 3202}, {1459, 3202}}, 
     {{1461, 3206}, {1462, 3206}}, {{1464, 1739}, {1465, 1739}}, 
     {{1467, 3216}, {1468, 3216}}, {{1470, 3956}, {1471, 3956}}, 
     {{1473, 3980}, {1474, 3980}}, {{1476, 3240}, {1477, 3240}}, 
     {{1479, 3977}, {1480, 3977}}, {{1482, 3978}, {1483, 3978}}, 
     {{1485, 3233}, {1486, 3233}}, {{1488, 3235}, {1489, 3235}}, 
     {{1491, 989}, {1492, 989}}, {{1494, 240}, {1495, 240}}, 
     {{1497, 240}, {1498, 240}}, {{1500, -1262}, {1501, -1262}}, 
     {{1503, 246}, {1504, 246}}, {{1506, -1260}, {1507, -1260}}, 
     {{1509, 262}, {1510, 262}}, {{1512, -1252}, {1513, -1252}}, 
     {{1515, -490}, {1516, -490}}, {{1518, 1028}, {1519, 1028}}, 
     {{1521, 1028}, {1522, 1028}}, {{1524, 1308}, {1525, 1308}}, 
     {{1527, 1388}, {1528, 1388}}, {{1530, 2123}, {1531, 2123}}, 
     {{1533, 527}, {1534, 527}}, {{1536, 492}, {1537, 492}}, 
     {{1539, 2050}, {1540, 2050}}, {{1542, 2187}, {1543, 2187}}, 
     {{1545, 482}, {1546, 482}}, {{1548, 512}, {1549, 512}}, 
     {{1551, -1089}, {1552, -1089}}, {{1554, -1064}, {1555, -1064}}, 
     {{1557, -322}, {1558, -322}}, {{1560, -1882}, {1561, -1882}}, 
     {{1563, -1166}, {1564, -1166}}, {{1566, -359}, {1567, -359}}, 
     {{1569, -197}, {1570, -197}}, {{1572, -1606}, {1573, -1606}}, 
     {{1575, -885}, {1576, -885}}, {{1578, -622}, {1579, -622}}, 
     {{1581, -2189}, {1582, -2189}}, {{1584, -3813}, {1585, -3813}}, 
     {{1587, -4028}, {1588, -4028}}, {{1590, -2402}, {1591, -2402}}, 
     {{1593, -1606}, {1594, -1606}}, {{1596, -1441}, {1597, -1441}}, 
     {{1599, -3870}, {1600, -3870}}, {{1602, -4633}, {1603, -4633}}, 
     {{1605, -4537}, {1606, -4537}}, {{1608, -6208}, {1609, -6208}}, 
     {{1611, -6188}, {1612, -6188}}, {{1614, -7882}, {1615, -7882}}, 
     {{1617, -8658}, {1618, -8658}}, {{1620, -8767}, {1621, -8767}}, 
     {{1623, -7872}, {1624, -7872}}, {{1626, -8674}, {1627, -8674}}, 
     {{1629, -9518}, {1630, -9518}}, {{1632, -9511}, {1633, -9511}}, 
     {{1635, -10187}, {1636, -10187}}, {{1638, -10965}, {1639, -10965}}, 
     {{1641, -9386}, {1642, -9386}}, {{1644, -7697}, {1645, -7697}}, 
     {{1647, -7669}, {1648, -7669}}, {{1650, -6763}, {1651, -6763}}, 
     {{1653, -6855}, {1654, -6855}}, {{1656, -5210}, {1657, -5210}}, 
     {{1659, -6046}, {1660, -6046}}, {{1662, -5974}, {1663, -5974}}, 
     {{1665, -6786}, {1666, -6786}}, {{1668, -7517}, {1669, -7517}}, 
     {{1671, -8285}, {1672, -8285}}, {{1674, -7638}, {1675, -7638}}, 
     {{1677, -8580}, {1678, -8580}}, {{1680, -6910}, {1681, -6910}}, 
     {{1683, -6910}, {1684, -6910}}, {{1686, -6769}, {1687, -6769}}, 
     {{1689, -5091}, {1690, -5091}}, {{1692, -4331}, {1693, -4331}}, 
     {{1695, -6095}, {1696, -6095}}, {{1698, -7731}, {1699, -7731}}, 
     {{1701, -8546}, {1702, -8546}}, {{1704, -8508}, {1705, -8508}}, 
     {{1707, -7699}, {1708, -7699}}, {{1710, -8594}, {1711, -8594}}, 
     {{1713, -6884}, {1714, -6884}}, {{1716, -6044}, {1717, -6044}}, 
     {{1719, -4348}, {1720, -4348}}, {{1722, -4383}, {1723, -4383}}, 
     {{1725, -5212}, {1726, -5212}}, {{1728, -3551}, {1729, -3551}}, 
     {{1731, -4337}, {1732, -4337}}, {{1734, -5199}, {1735, -5199}}, 
     {{1737, -4308}, {1738, -4308}}, {{1740, -4200}, {1741, -4200}}, 
     {{1743, -6848}, {1744, -6848}}, {{1746, -5996}, {1747, -5996}}, 
     {{1749, -7796}, {1750, -7796}}, {{1752, -6951}, {1753, -6951}}, 
     {{1755, -6962}, {1756, -6962}}, {{1758, -6920}, {1759, -6920}}, 
     {{1761, -6932}, {1762, -6932}}, {{1764, -5021}, {1765, -5021}}, 
     {{1767, -4132}, {1768, -4132}}, {{1770, -2346}, {1771, -2346}}, 
     {{1773, -3287}, {1774, -3287}}, {{1776, -2401}, {1777, -2401}}, 
     {{1779, -3271}, {1780, -3271}}, {{1782, -2345}, {1783, -2345}}, 
     {{1785, -2376}, {1786, -2376}}, {{1788, -4201}, {1789, -4201}}, 
     {{1791, -5979}, {1792, -5979}}, {{1794, -4176}, {1795, -4176}}, 
     {{1797, -2330}, {1798, -2330}}, {{1800, -2271}, {1801, -2271}}, 
     {{1803, -3207}, {1804, -3207}}, {{1806, -2289}, {1807, -2289}}, 
     {{1809, -1358}, {1810, -1358}}, {{1812, -3134}, {1813, -3134}}, 
     {{1815, -2236}, {1816, -2236}}, {{1818, -1320}, {1819, -1320}}, 
     {{1821, 513}, {1822, 513}}, {{1824, 493}, {1825, 493}}, 
     {{1827, -440}, {1828, -440}}, {{1830, 1413}, {1831, 1413}}, 
     {{1833, -441}, {1834, -441}}, {{1836, -428}, {1837, -428}}, 
     {{1839, 2315}, {1840, 2315}}, {{1842, 2365}, {1843, 2365}}, 
     {{1845, 3288}, {1846, 3288}}, {{1848, 1417}, {1849, 1417}}, 
     {{1851, 2361}, {1852, 2361}}, {{1854, 3266}, {1855, 3266}}, 
     {{1857, 3195}, {1858, 3195}}, {{1860, 4110}, {1861, 4110}}, 
     {{1863, 3171}, {1864, 3171}}, {{1866, 3259}, {1867, 3259}}, 
     {{1869, 1378}, {1870, 1378}}, {{1872, 1353}, {1873, 1353}}, 
     {{1875, 1410}, {1876, 1410}}, {{1878, -478}, {1879, -478}}, 
     {{1881, -1490}, {1882, -1490}}, {{1884, 414}, {1885, 414}}, 
     {{1887, -2480}, {1888, -2480}}, {{1890, -3462}, {1891, -3462}}, 
     {{1893, -1552}, {1894, -1552}}, {{1896, 386}, {1897, 386}}, 
     {{1899, 532}, {1900, 532}}, {{1902, -1292}, {1903, -1292}}, 
     {{1905, -1250}, {1906, -1250}}, {{1908, -1269}, {1909, -1269}}, 
     {{1911, -1292}, {1912, -1292}}, {{1914, -1201}, {1915, -1201}}, 
     {{1917, -341}, {1918, -341}}, {{1920, -177}, {1921, -177}}, 
     {{1923, 1822}, {1924, 1822}}, {{1926, 1822}, {1927, 1822}}, 
     {{1929, 3615}, {1930, 3615}}, {{1932, 1704}, {1933, 1704}}, 
     {{1935, 1658}, {1936, 1658}}, {{1938, 3638}, {1939, 3638}}, 
     {{1941, 5562}, {1942, 5562}}, {{1944, 7568}, {1945, 7568}}, 
     {{1947, 6485}, {1948, 6485}}, {{1950, 5583}, {1951, 5583}}, 
     {{1953, 4625}, {1954, 4625}}, {{1956, 4581}, {1957, 4581}}, 
     {{1959, 5410}, {1960, 5410}}, {{1962, 6429}, {1963, 6429}}, 
     {{1965, 6420}, {1966, 6420}}, {{1968, 8378}, {1969, 8378}}, 
     {{1971, 8320}, {1972, 8320}}, {{1974, 8303}, {1975, 8303}}, 
     {{1977, 9355}, {1978, 9355}}, {{1980, 7448}, {1981, 7448}}, 
     {{1983, 10424}, {1984, 10424}}, {{1986, 10350}, {1987, 10350}}, 
     {{1989, 9377}, {1990, 9377}}, {{1992, 9405}, {1993, 9405}}, 
     {{1995, 10407}, {1996, 10407}}, {{1998, 9380}, {1999, 9380}}, 
     {{2001, 7406}, {2002, 7406}}, {{2004, 7426}, {2005, 7426}}, 
     {{2007, 7399}, {2008, 7399}}, {{2010, 8466}, {2011, 8466}}, 
     {{2013, 6440}, {2014, 6440}}, {{2016, 4484}, {2017, 4484}}, 
     {{2019, 5619}, {2020, 5619}}, {{2022, 5695}, {2023, 5695}}, 
     {{2025, 5695}, {2026, 5695}}, {{2028, 5708}, {2029, 5708}}, 
     {{2031, 6740}, {2032, 6740}}, {{2034, 7810}, {2035, 7810}}, 
     {{2037, 5856}, {2038, 5856}}, {{2040, 5656}, {2041, 5656}}, 
     {{2043, 7726}, {2044, 7726}}, {{2046, 9764}, {2047, 9764}}, 
     {{2049, 11822}, {2050, 11822}}, {{2052, 12980}, {2053, 12980}}, 
     {{2055, 9937}, {2056, 9937}}, {{2058, 9937}, {2059, 9937}}, 
     {{2061, 10975}, {2062, 10975}}, {{2064, 10919}, {2065, 10919}}, 
     {{2067, 9888}, {2068, 9888}}, {{2070, 8858}, {2071, 8858}}, 
     {{2073, 10933}, {2074, 10933}}, {{2076, 9860}, {2077, 9860}}, 
     {{2079, 12033}, {2080, 12033}}, {{2082, 9868}, {2083, 9868}}, 
     {{2085, 7743}, {2086, 7743}}, {{2088, 5558}, {2089, 5558}}, 
     {{2091, 4440}, {2092, 4440}}, {{2094, 2307}, {2095, 2307}}, 
     {{2097, 3371}, {2098, 3371}}, {{2100, 3284}, {2101, 3284}}, 
     {{2103, 6414}, {2104, 6414}}, {{2106, 7485}, {2107, 7485}}, 
     {{2109, 6399}, {2110, 6399}}, {{2112, 4276}, {2113, 4276}}, 
     {{2115, 2095}, {2116, 2095}}, {{2118, 2164}, {2119, 2164}}, 
     {{2121, 2272}, {2122, 2272}}, {{2124, 4466}, {2125, 4466}}, 
     {{2127, 6625}, {2128, 6625}}, {{2130, 6704}, {2131, 6704}}, 
     {{2133, 5669}, {2134, 5669}}, {{2136, 3498}, {2137, 3498}}, 
     {{2139, 2430}, {2140, 2430}}, {{2142, 1428}, {2143, 1428}}, 
     {{2145, 1386}, {2146, 1386}}, {{2148, 1292}, {2149, 1292}}, 
     {{2151, 2462}, {2152, 2462}}, {{2154, 306}, {2155, 306}}, 
     {{2157, 2501}, {2158, 2501}}, {{2160, 2454}, {2161, 2454}}, 
     {{2163, -773}, {2164, -773}}, {{2166, 270}, {2167, 270}}, 
     {{2169, 1372}, {2170, 1372}}, {{2172, 3570}, {2173, 3570}}, 
     {{2175, 5795}, {2176, 5795}}, {{2178, 6892}, {2179, 6892}}, 
     {{2181, 6875}, {2182, 6875}}, {{2184, 9019}, {2185, 9019}}, 
     {{2187, 9029}, {2188, 9029}}, {{2190, 11226}, {2191, 11226}}, 
     {{2193, 11296}, {2194, 11296}}, {{2196, 13558}, {2197, 13558}}, 
     {{2199, 13449}, {2200, 13449}}, {{2202, 13572}, {2203, 13572}}, 
     {{2205, 12565}, {2206, 12565}}, {{2208, 12486}, {2209, 12486}}, 
     {{2211, 12599}, {2212, 12599}}, {{2214, 11369}, {2215, 11369}}, 
     {{2217, 13587}, {2218, 13587}}, {{2220, 15702}, {2221, 15702}}, 
     {{2223, 13565}, {2224, 13565}}, {{2226, 14705}, {2227, 14705}}, 
     {{2229, 17013}, {2230, 17013}}, {{2232, 17011}, {2233, 17011}}, 
     {{2235, 15834}, {2236, 15834}}, {{2238, 13501}, {2239, 13501}}, 
     {{2241, 12390}, {2242, 12390}}, {{2244, 10047}, {2245, 10047}}, 
     {{2247, 11074}, {2248, 11074}}, {{2250, 12246}, {2251, 12246}}, 
     {{2253, 12350}, {2254, 12350}}, {{2256, 11242}, {2257, 11242}}, 
     {{2259, 13449}, {2260, 13449}}, {{2262, 13420}, {2263, 13420}}, 
     {{2265, 13314}, {2266, 13314}}, {{2268, 11094}, {2269, 11094}}, 
     {{2271, 9998}, {2272, 9998}}, {{2274, 7659}, {2275, 7659}}, 
     {{2277, 7659}, {2278, 7659}}, {{2280, 7618}, {2281, 7618}}, 
     {{2283, 6564}, {2284, 6564}}, {{2286, 7683}, {2287, 7683}}, 
     {{2289, 5504}, {2290, 5504}}, {{2292, 5363}, {2293, 5363}}, 
     {{2295, 3041}, {2296, 3041}}, {{2298, 873}, {2299, 873}}, 
     {{2301, -209}, {2302, -209}}, {{2304, 987}, {2305, 987}}, 
     {{2307, 4427}, {2308, 4427}}, {{2310, 2164}, {2311, 2164}}, 
     {{2313, 937}, {2314, 937}}, {{2316, 860}, {2317, 860}}, 
     {{2319, 2107}, {2320, 2107}}, {{2322, 3314}, {2323, 3314}}, 
     {{2325, 4343}, {2326, 4343}}, {{2328, 6677}, {2329, 6677}}, 
     {{2331, 6661}, {2332, 6661}}, {{2334, 4297}, {2335, 4297}}, 
     {{2337, 4257}, {2338, 4257}}, {{2340, 1922}, {2341, 1922}}, 
     {{2343, 615}, {2344, 615}}, {{2346, 654}, {2347, 654}}, 
     {{2349, -492}, {2350, -492}}, {{2352, -1660}, {2353, -1660}}, 
     {{2355, -2747}, {2356, -2747}}, {{2358, -3856}, {2359, -3856}}, 
     {{2361, -1500}, {2362, -1500}}, {{2364, 906}, {2365, 906}}, 
     {{2367, -278}, {2368, -278}}, {{2370, 2103}, {2371, 2103}}, 
     {{2373, -291}, {2374, -291}}, {{2376, 980}, {2377, 980}}, 
     {{2379, -2616}, {2380, -2616}}, {{2382, -5038}, {2383, -5038}}, 
     {{2385, -6138}, {2386, -6138}}, {{2388, -6096}, {2389, -6096}}, 
     {{2391, -7185}, {2392, -7185}}, {{2394, -8420}, {2395, -8420}}, 
     {{2397, -8448}, {2398, -8448}}, {{2400, -10879}, {2401, -10879}}, 
     {{2403, -9652}, {2404, -9652}}, {{2406, -12154}, {2407, -12154}}, 
     {{2409, -12253}, {2410, -12253}}, {{2412, -14675}, {2413, -14675}}, 
     {{2415, -13566}, {2416, -13566}}, {{2418, -13581}, {2419, -13581}}, 
     {{2421, -12395}, {2422, -12395}}, {{2424, -14942}, {2425, -14942}}, 
     {{2427, -12510}, {2428, -12510}}, {{2430, -11278}, {2431, -11278}}, 
     {{2433, -11186}, {2434, -11186}}, {{2436, -8785}, {2437, -8785}}, 
     {{2439, -11239}, {2440, -11239}}, {{2442, -11247}, {2443, -11247}}, 
     {{2445, -11221}, {2446, -11221}}, {{2448, -11214}, {2449, -11214}}, 
     {{2451, -11232}, {2452, -11232}}, {{2454, -11225}, {2455, -11225}}, 
     {{2457, -10074}, {2458, -10074}}, {{2460, -10054}, {2461, -10054}}, 
     {{2463, -6360}, {2464, -6360}}, {{2466, -7560}, {2467, -7560}}, 
     {{2469, -7644}, {2470, -7644}}, {{2472, -5102}, {2473, -5102}}, 
     {{2475, -5167}, {2476, -5167}}, {{2478, -5020}, {2479, -5020}}, 
     {{2481, -2455}, {2482, -2455}}, {{2484, -2555}, {2485, -2555}}, 
     {{2487, -3787}, {2488, -3787}}, {{2490, -1289}, {2491, -1289}}, 
     {{2493, -99}, {2494, -99}}, {{2496, -157}, {2497, -157}}, 
     {{2499, 2255}, {2500, 2255}}, {{2502, 3493}, {2503, 3493}}, 
     {{2505, 976}, {2506, 976}}, {{2508, 921}, {2509, 921}}, 
     {{2511, 884}, {2512, 884}}, {{2514, 817}, {2515, 817}}, 
     {{2517, 3241}, {2518, 3241}}, {{2520, 5790}, {2521, 5790}}, 
     {{2523, 3314}, {2524, 3314}}, {{2526, 2040}, {2527, 2040}}, 
     {{2529, 2040}, {2530, 2040}}, {{2532, 1971}, {2533, 1971}}, 
     {{2535, 1916}, {2536, 1916}}, {{2538, 3118}, {2539, 3118}}, 
     {{2541, 1831}, {2542, 1831}}, {{2544, -753}, {2545, -753}}, 
     {{2547, -732}, {2548, -732}}, {{2550, -2032}, {2551, -2032}}, 
     {{2553, -4559}, {2554, -4559}}, {{2556, -4579}, {2557, -4579}}, 
     {{2559, -3251}, {2560, -3251}}, {{2562, -651}, {2563, -651}}, 
     {{2565, 639}, {2566, 639}}, {{2568, 3183}, {2569, 3183}}, 
     {{2571, 4519}, {2572, 4519}}, {{2574, 5836}, {2575, 5836}}, 
     {{2577, 7151}, {2578, 7151}}, {{2580, 7057}, {2581, 7057}}, 
     {{2583, 9568}, {2584, 9568}}, {{2586, 6988}, {2587, 6988}}, 
     {{2589, 9640}, {2590, 9640}}, {{2592, 9612}, {2593, 9612}}, 
     {{2595, 8378}, {2596, 8378}}, {{2598, 7091}, {2599, 7091}}, 
     {{2601, 8355}, {2602, 8355}}, {{2604, 10961}, {2605, 10961}}, 
     {{2607, 12242}, {2608, 12242}}, {{2610, 10918}, {2611, 10918}}, 
     {{2613, 10921}, {2614, 10921}}, {{2616, 13553}, {2617, 13553}}, 
     {{2619, 13637}, {2620, 13637}}, {{2622, 13629}, {2623, 13629}}, 
     {{2625, 14950}, {2626, 14950}}, {{2628, 14907}, {2629, 14907}}, 
     {{2631, 16092}, {2632, 16092}}, {{2634, 13515}, {2635, 13515}}, 
     {{2637, 12134}, {2638, 12134}}, {{2640, 12134}, {2641, 12134}}, 
     {{2643, 16077}, {2644, 16077}}, {{2646, 16077}, {2647, 16077}}, 
     {{2649, 16067}, {2650, 16067}}, {{2652, 17398}, {2653, 17398}}, 
     {{2655, 20028}, {2656, 20028}}, {{2658, 17370}, {2659, 17370}}, 
     {{2661, 17341}, {2662, 17341}}, {{2664, 15986}, {2665, 15986}}, 
     {{2667, 11978}, {2668, 11978}}, {{2670, 14700}, {2671, 14700}}, 
     {{2673, 13394}, {2674, 13394}}, {{2676, 12091}, {2677, 12091}}, 
     {{2679, 8055}, {2680, 8055}}, {{2682, 9415}, {2683, 9415}}, 
     {{2685, 6711}, {2686, 6711}}, {{2688, 4029}, {2689, 4029}}, 
     {{2691, 1347}, {2692, 1347}}, {{2694, -1310}, {2695, -1310}}, 
     {{2697, -2649}, {2698, -2649}}, {{2700, -5372}, {2701, -5372}}, 
     {{2703, -6733}, {2704, -6733}}, {{2706, -4012}, {2707, -4012}}, 
     {{2709, -5365}, {2710, -5365}}, {{2712, -8052}, {2713, -8052}}, 
     {{2715, -12149}, {2716, -12149}}, {{2718, -13501}, {2719, -13501}}, 
     {{2721, -13531}, {2722, -13531}}, {{2724, -10780}, {2725, -10780}}, 
     {{2727, -12130}, {2728, -12130}}, {{2730, -14864}, {2731, -14864}}, 
     {{2733, -14875}, {2734, -14875}}, {{2736, -12127}, {2737, -12127}}, 
     {{2739, -14849}, {2740, -14849}}, {{2742, -17602}, {2743, -17602}}, 
     {{2745, -16220}, {2746, -16220}}, {{2748, -13474}, {2749, -13474}}, 
     {{2751, -16237}, {2752, -16237}}, {{2754, -17603}, {2755, -17603}}, 
     {{2757, -17604}, {2758, -17604}}, {{2760, -17591}, {2761, -17591}}, 
     {{2763, -14846}, {2764, -14846}}, {{2766, -17619}, {2767, -17619}}, 
     {{2769, -20392}, {2770, -20392}}, {{2772, -20385}, {2773, -20385}}, 
     {{2775, -20404}, {2776, -20404}}, {{2778, -23187}, {2779, -23187}}, 
     {{2781, -21781}, {2782, -21781}}, {{2784, -23172}, {2785, -23172}}, 
     {{2787, -21758}, {2788, -21758}}, {{2790, -23153}, {2791, -23153}}, 
     {{2793, -24557}, {2794, -24557}}, {{2796, -27349}, {2797, -27349}}, 
     {{2799, -27344}, {2800, -27344}}, {{2802, -30152}, {2803, -30152}}, 
     {{2805, -30159}, {2806, -30159}}, {{2808, -30176}, {2809, -30176}}, 
     {{2811, -30159}, {2812, -30159}}, {{2814, -27341}, {2815, -27341}}, 
     {{2817, -25935}, {2818, -25935}}, {{2820, -25910}, {2821, -25910}}, 
     {{2823, -27374}, {2824, -27374}}, {{2826, -27374}, {2827, -27374}}, 
     {{2829, -27360}, {2830, -27360}}, {{2832, -27343}, {2833, -27343}}, 
     {{2835, -30191}, {2836, -30191}}, {{2838, -30180}, {2839, -30180}}, 
     {{2841, -27312}, {2842, -27312}}, {{2844, -28716}, {2845, -28716}}, 
     {{2847, -27302}, {2848, -27302}}, {{2850, -28724}, {2851, -28724}}, 
     {{2853, -30151}, {2854, -30151}}, {{2856, -27278}, {2857, -27278}}, 
     {{2859, -25842}, {2860, -25842}}, {{2862, -27289}, {2863, -27289}}, 
     {{2865, -27269}, {2866, -27269}}, {{2868, -24377}, {2869, -24377}}, 
     {{2871, -21494}, {2872, -21494}}, {{2874, -22937}, {2875, -22937}}, 
     {{2877, -24395}, {2878, -24395}}, {{2880, -24392}, {2881, -24392}}, 
     {{2883, -24392}, {2884, -24392}}, {{2886, -21501}, {2887, -21501}}, 
     {{2889, -22950}, {2890, -22950}}, {{2892, -22950}, {2893, -22950}}, 
     {{2895, -21529}, {2896, -21529}}, {{2898, -22969}, {2899, -22969}}, 
     {{2901, -20053}, {2902, -20053}}, {{2904, -20038}, {2905, -20038}}, 
     {{2907, -20032}, {2908, -20032}}, {{2910, -20034}, {2911, -20034}}, 
     {{2913, -17101}, {2914, -17101}}, {{2916, -20039}, {2917, -20039}}, 
     {{2919, -21497}, {2920, -21497}}, {{2922, -21487}, {2923, -21487}}, 
     {{2925, -20026}, {2926, -20026}}, {{2928, -20022}, {2929, -20022}}, 
     {{2931, -18554}, {2932, -18554}}, {{2934, -17088}, {2935, -17088}}, 
     {{2937, -17091}, {2938, -17091}}, {{2940, -20051}, {2941, -20051}}, 
     {{2943, -17100}, {2944, -17100}}, {{2946, -20040}, {2947, -20040}}, 
     {{2949, -17076}, {2950, -17076}}, {{2952, -15593}, {2953, -15593}}, 
     {{2955, -20043}, {2956, -20043}}, {{2958, -20069}, {2959, -20069}}, 
     {{2961, -18594}, {2962, -18594}}, {{2964, -18639}, {2965, -18639}}, 
     {{2967, -17141}, {2968, -17141}}, {{2970, -18644}, {2971, -18644}}, 
     {{2973, -18653}, {2974, -18653}}, {{2976, -17152}, {2977, -17152}}, 
     {{2979, -14163}, {2980, -14163}}, {{2982, -11159}, {2983, -11159}}, 
     {{2985, -11163}, {2986, -11163}}, {{2988, -8169}, {2989, -8169}}, 
     {{2991, -5174}, {2992, -5174}}, {{2994, -5176}, {2995, -5176}}, 
     {{2997, -3676}, {2998, -3676}}, {{3000, -3674}, {3001, -3674}}, 
     {{3003, -5178}, {3004, -5178}}, {{3006, -3677}, {3007, -3677}}, 
     {{3009, -3685}, {3010, -3685}}, {{3012, -3692}, {3013, -3692}}, 
     {{3015, -3699}, {3016, -3699}}, {{3018, -3705}, {3019, -3705}}, 
     {{3021, -6730}, {3022, -6730}}, {{3024, -6736}, {3025, -6736}}, 
     {{3027, -6744}, {3028, -6744}}, {{3030, -3707}, {3031, -3707}}, 
     {{3033, -2055}, {3034, -2055}}, {{3036, -2139}, {3037, -2139}}, 
     {{3039, -2229}, {3040, -2229}}, {{3042, -3727}, {3043, -3727}}, 
     {{3045, -568}, {3046, -568}}, {{3048, 2576}, {3049, 2576}}, 
     {{3051, 1039}, {3052, 1039}}, {{3054, 1168}, {3055, 1168}}, 
     {{3057, 850}, {3058, 850}}, {{3060, -2280}, {3061, -2280}}, 
     {{3063, -754}, {3064, -754}}, {{3066, 2425}, {3067, 2425}}, 
     {{3069, 1101}, {3070, 1101}}, {{3072, 1210}, {3073, 1210}}, 
     {{3075, 1220}, {3076, 1220}}, {{3078, 2759}, {3079, 2759}}, 
     {{3081, -162}, {3082, -162}}, {{3084, -3279}, {3085, -3279}}, 
     {{3087, -155}, {3088, -155}}, {{3090, -122}, {3091, -122}}, 
     {{3093, 2931}, {3094, 2931}}, {{3096, 5994}, {3097, 5994}}, 
     {{3099, 10656}, {3100, 10656}}, {{3102, 13726}, {3103, 13726}}, 
     {{3105, 15361}, {3106, 15361}}, {{3108, 18585}, {3109, 18585}}, 
     {{3111, 13826}, {3112, 13826}}, {{3114, 15302}, {3115, 15302}}, 
     {{3117, 15583}, {3118, 15583}}, {{3120, 15691}, {3121, 15691}}, 
     {{3123, 12569}, {3124, 12569}}, {{3126, 11193}, {3127, 11193}}, 
     {{3129, 11250}, {3130, 11250}}, {{3132, 11239}, {3133, 11239}}, 
     {{3135, 16036}, {3136, 16036}}, {{3138, 12820}, {3139, 12820}}, 
     {{3141, 14351}, {3142, 14351}}, {{3144, 17613}, {3145, 17613}}, 
     {{3147, 17788}, {3148, 17788}}, {{3150, 19421}, {3151, 19421}}, 
     {{3153, 22724}, {3154, 22724}}, {{3156, 22757}, {3157, 22757}}, 
     {{3159, 22211}, {3160, 22211}}, {{3162, 25351}, {3163, 25351}}, 
     {{3165, 22241}, {3166, 22241}}, {{3168, 22016}, {3169, 22016}}, 
     {{3171, 17256}, {3172, 17256}}, {{3174, 19085}, {3175, 19085}}, 
     {{3177, 19085}, {3178, 19085}}, {{3180, 17571}, {3181, 17571}}, 
     {{3183, 15919}, {3184, 15919}}, {{3186, 15919}, {3187, 15919}}, 
     {{3189, 16003}, {3190, 16003}}, {{3192, 15648}, {3193, 15648}}, 
     {{3195, 18864}, {3196, 18864}}, {{3198, 22059}, {3199, 22059}}, 
     {{3201, 22215}, {3202, 22215}}, {{3204, 22356}, {3205, 22356}}, 
     {{3207, 24342}, {3208, 24342}}, {{3210, 24728}, {3211, 24728}}, 
     {{3213, 24728}, {3214, 24728}}, {{3216, 28036}, {3217, 28036}}, 
     {{3219, 26237}, {3220, 26237}}, {{3222, 24585}, {3223, 24585}}, 
     {{3225, 26214}, {3226, 26214}}, {{3228, 29447}, {3229, 29447}}, 
     {{3231, 29499}, {3232, 29499}}, {{3234, 31057}, {3235, 31057}}, 
     {{3237, 31476}, {3238, 31476}}, {{3240, 34784}, {3241, 34784}}, 
     {{3243, 36500}, {3244, 36500}}, {{3246, 33221}, {3247, 33221}}, 
     {{3249, 34808}, {3250, 34808}}, {{3252, 33108}, {3253, 33108}}, 
     {{3255, 35068}, {3256, 35068}}, {{3258, 33295}, {3259, 33295}}, 
     {{3261, 33583}, {3262, 33583}}, {{3264, 33651}, {3265, 33651}}, 
     {{3267, 33713}, {3268, 33713}}, {{3270, 36982}, {3271, 36982}}, 
     {{3273, 37190}, {3274, 37190}}, {{3276, 38742}, {3277, 38742}}, 
     {{3279, 40264}, {3280, 40264}}, {{3282, 40222}, {3283, 40222}}, 
     {{3285, 40222}, {3286, 40222}}, {{3288, 40381}, {3289, 40381}}, 
     {{3291, 41969}, {3292, 41969}}, {{3294, 43511}, {3295, 43511}}, 
     {{3297, 43552}, {3298, 43552}}, {{3300, 40234}, {3301, 40234}}, 
     {{3303, 37114}, {3304, 37114}}, {{3306, 40396}, {3307, 40396}}, 
     {{3309, 40424}, {3310, 40424}}, {{3312, 37037}, {3313, 37037}}, 
     {{3315, 38592}, {3316, 38592}}, {{3318, 41911}, {3319, 41911}}, 
     {{3321, 40126}, {3322, 40126}}, {{3324, 36852}, {3325, 36852}}, 
     {{3327, 40251}, {3328, 40251}}, {{3330, 38704}, {3331, 38704}}, 
     {{3333, 35289}, {3334, 35289}}, {{3336, 35155}, {3337, 35155}}, 
     {{3339, 38444}, {3340, 38444}}, {{3342, 38339}, {3343, 38339}}, 
     {{3345, 35072}, {3346, 35072}}, {{3348, 31571}, {3349, 31571}}, 
     {{3351, 34879}, {3352, 34879}}, {{3354, 38261}, {3355, 38261}}, 
     {{3357, 36494}, {3358, 36494}}, {{3360, 33133}, {3361, 33133}}, 
     {{3363, 29742}, {3364, 29742}}, {{3366, 31264}, {3367, 31264}}, 
     {{3369, 31333}, {3370, 31333}}, {{3372, 27965}, {3373, 27965}}, 
     {{3375, 24642}, {3376, 24642}}, {{3378, 24556}, {3379, 24556}}, 
     {{3381, 26198}, {3382, 26198}}, {{3384, 26122}, {3385, 26122}}, 
     {{3387, 31252}, {3388, 31252}}, {{3390, 31346}, {3391, 31346}}, 
     {{3393, 29658}, {3394, 29658}}, {{3396, 29677}, {3397, 29677}}, 
     {{3399, 31283}, {3400, 31283}}, {{3402, 32872}, {3403, 32872}}, 
     {{3405, 32891}, {3406, 32891}}, {{3408, 29456}, {3409, 29456}}, 
     {{3411, 33149}, {3412, 33149}}, {{3414, 29697}, {3415, 29697}}, 
     {{3417, 29785}, {3418, 29785}}, {{3420, 33209}, {3421, 33209}}, 
     {{3423, 31591}, {3424, 31591}}, {{3426, 29828}, {3427, 29828}}, 
     {{3429, 31646}, {3430, 31646}}, {{3432, 33321}, {3433, 33321}}, 
     {{3435, 28171}, {3436, 28171}}, {{3438, 29833}, {3439, 29833}}, 
     {{3441, 29892}, {3442, 29892}}, {{3444, 33322}, {3445, 33322}}, 
     {{3447, 33365}, {3448, 33365}}, {{3450, 31470}, {3451, 31470}}, 
     {{3453, 31690}, {3454, 31690}}, {{3456, 31565}, {3457, 31565}}, 
     {{3459, 33292}, {3460, 33292}}, {{3462, 29936}, {3463, 29936}}, 
     {{3465, 28104}, {3466, 28104}}, {{3468, 27893}, {3469, 27893}}, 
     {{3471, 22806}, {3472, 22806}}, {{3474, 24590}, {3475, 24590}}, 
     {{3477, 22833}, {3478, 22833}}, {{3480, 21224}, {3481, 21224}}, 
     {{3483, 22958}, {3484, 22958}}, {{3486, 22949}, {3487, 22949}}, 
     {{3489, 26475}, {3490, 26475}}, {{3492, 22955}, {3493, 22955}}, 
     {{3495, 24641}, {3496, 24641}}, {{3498, 28084}, {3499, 28084}}, 
     {{3501, 26300}, {3502, 26300}}, {{3504, 26532}, {3505, 26532}}, 
     {{3507, 28488}, {3508, 28488}}, {{3510, 28488}, {3511, 28488}}, 
     {{3513, 28606}, {3514, 28606}}, {{3516, 25172}, {3517, 25172}}, 
     {{3519, 25150}, {3520, 25150}}, {{3522, 25177}, {3523, 25177}}, 
     {{3525, 26948}, {3526, 26948}}, {{3528, 23583}, {3529, 23583}}, 
     {{3531, 18280}, {3532, 18280}}, {{3534, 18359}, {3535, 18359}}, 
     {{3537, 16600}, {3538, 16600}}, {{3540, 13032}, {3541, 13032}}, 
     {{3543, 14802}, {3544, 14802}}, {{3546, 16580}, {3547, 16580}}, 
     {{3549, 14798}, {3550, 14798}}, {{3552, 16556}, {3553, 16556}}, 
     {{3555, 16509}, {3556, 16509}}, {{3558, 12826}, {3559, 12826}}, 
     {{3561, 13121}, {3562, 13121}}, {{3564, 13142}, {3565, 13142}}, 
     {{3567, 11227}, {3568, 11227}}, {{3570, 11269}, {3571, 11269}}, 
     {{3573, 9548}, {3574, 9548}}, {{3576, 11281}, {3577, 11281}}, 
     {{3579, 14865}, {3580, 14865}}, {{3582, 13045}, {3583, 13045}}, 
     {{3585, 9479}, {3586, 9479}}, {{3588, 9516}, {3589, 9516}}, 
     {{3591, 9653}, {3592, 9653}}, {{3594, 6062}, {3595, 6062}}, 
     {{3597, 6048}, {3598, 6048}}, {{3600, 5942}, {3601, 5942}}, 
     {{3603, 11423}, {3604, 11423}}, {{3606, 7822}, {3607, 7822}}, 
     {{3609, 5969}, {3610, 5969}}, {{3612, 7598}, {3613, 7598}}, 
     {{3615, 2169}, {3616, 2169}}, {{3618, 407}, {3619, 407}}, 
     {{3621, -3218}, {3622, -3218}}, {{3624, -3073}, {3625, -3073}}, 
     {{3627, -3073}, {3628, -3073}}, {{3630, -1281}, {3631, -1281}}, 
     {{3633, -5016}, {3634, -5016}}, {{3636, -5200}, {3637, -5200}}, 
     {{3639, -6894}, {3640, -6894}}, {{3642, -6829}, {3643, -6829}}, 
     {{3645, -8598}, {3646, -8598}}, {{3648, -4871}, {3649, -4871}}, 
     {{3651, -1320}, {3652, -1320}}, {{3654, 516}, {3655, 516}}, 
     {{3657, -3149}, {3658, -3149}}, {{3660, -6784}, {3661, -6784}}, 
     {{3663, -3307}, {3664, -3307}}, {{3666, 325}, {3667, 325}}, 
     {{3669, 4083}, {3670, 4083}}, {{3672, 473}, {3673, 473}}, 
     {{3675, -3045}, {3676, -3045}}, {{3678, -6812}, {3679, -6812}}, 
     {{3681, -5084}, {3682, -5084}}, {{3684, -4857}, {3685, -4857}}, 
     {{3687, -6355}, {3688, -6355}}, {{3690, -8197}, {3691, -8197}}, 
     {{3693, -8040}, {3694, -8040}}, {{3696, -4481}, {3697, -4481}}, 
     {{3699, -6166}, {3700, -6166}}, {{3702, -9961}, {3703, -9961}}, 
     {{3705, -8037}, {3706, -8037}}, {{3708, -8040}, {3709, -8040}}, 
     {{3711, -6092}, {3712, -6092}}, {{3714, -6130}, {3715, -6130}}, 
     {{3717, -4317}, {3718, -4317}}, {{3720, -6049}, {3721, -6049}}, 
     {{3723, -6270}, {3724, -6270}}, {{3726, -6270}, {3727, -6270}}, 
     {{3729, -10011}, {3730, -10011}}, {{3732, -13758}, {3733, -13758}}, 
     {{3735, -13625}, {3736, -13625}}, {{3738, -9758}, {3739, -9758}}, 
     {{3741, -13533}, {3742, -13533}}, {{3744, -9698}, {3745, -9698}}, 
     {{3747, -7612}, {3748, -7612}}, {{3750, -5678}, {3751, -5678}}, 
     {{3753, -5678}, {3754, -5678}}, {{3756, -1927}, {3757, -1927}}, 
     {{3759, -1857}, {3760, -1857}}, {{3762, -3822}, {3763, -3822}}, 
     {{3765, -3977}, {3766, -3977}}, {{3768, -7754}, {3769, -7754}}, 
     {{3771, -7776}, {3772, -7776}}, {{3774, -5805}, {3775, -5805}}, 
     {{3777, -3794}, {3778, -3794}}, {{3780, -3832}, {3781, -3832}}, 
     {{3783, -5791}, {3784, -5791}}, {{3786, -5897}, {3787, -5897}}, 
     {{3789, -3929}, {3790, -3929}}, {{3792, -4094}, {3793, -4094}}, 
     {{3795, -6254}, {3796, -6254}}, {{3798, -8150}, {3799, -8150}}, 
     {{3801, -7884}, {3802, -7884}}, {{3804, -7722}, {3805, -7722}}, 
     {{3807, -7582}, {3808, -7582}}, {{3810, -3943}, {3811, -3943}}, 
     {{3813, -3767}, {3814, -3767}}, {{3816, -3936}, {3817, -3936}}, 
     {{3819, -5998}, {3820, -5998}}, {{3822, -7985}, {3823, -7985}}, 
     {{3825, -9940}, {3826, -9940}}, {{3828, -6039}, {3829, -6039}}, 
     {{3831, -3775}, {3832, -3775}}, {{3834, -5782}, {3835, -5782}}, 
     {{3837, -5741}, {3838, -5741}}, {{3840, -5692}, {3841, -5692}}, 
     {{3843, -5990}, {3844, -5990}}, {{3846, -6296}, {3847, -6296}}, 
     {{3849, -6388}, {3850, -6388}}, {{3852, -8370}, {3853, -8370}}, 
     {{3855, -14312}, {3856, -14312}}, {{3858, -18087}, {3859, -18087}}, 
     {{3861, -16093}, {3862, -16093}}, {{3864, -16021}, {3865, -16021}}, 
     {{3867, -10142}, {3868, -10142}}, {{3870, -8153}, {3871, -8153}}, 
     {{3873, -6286}, {3874, -6286}}, {{3876, -8401}, {3877, -8401}}, 
     {{3879, -12571}, {3880, -12571}}, {{3882, -16481}, {3883, -16481}}, 
     {{3885, -12578}, {3886, -12578}}, {{3888, -14518}, {3889, -14518}}, 
     {{3891, -16618}, {3892, -16618}}, {{3894, -12756}, {3895, -12756}}, 
     {{3897, -14763}, {3898, -14763}}, {{3900, -10810}, {3901, -10810}}, 
     {{3903, -4991}, {3904, -4991}}, {{3906, -7050}, {3907, -7050}}, 
     {{3909, -7121}, {3910, -7121}}, {{3912, -6885}, {3913, -6885}}, 
     {{3915, -10855}, {3916, -10855}}, {{3918, -14698}, {3919, -14698}}, 
     {{3921, -14886}, {3922, -14886}}, {{3924, -19041}, {3925, -19041}}, 
     {{3927, -18834}, {3928, -18834}}, {{3930, -18910}, {3931, -18910}}, 
     {{3933, -20962}, {3934, -20962}}, {{3936, -21063}, {3937, -21063}}, 
     {{3939, -23107}, {3940, -23107}}, {{3942, -21256}, {3943, -21256}}, 
     {{3945, -25374}, {3946, -25374}}, {{3948, -25325}, {3949, -25325}}, 
     {{3951, -23415}, {3952, -23415}}, {{3954, -23494}, {3955, -23494}}, 
     {{3957, -23758}, {3958, -23758}}, {{3960, -19646}, {3961, -19646}}, 
     {{3963, -17919}, {3964, -17919}}, {{3966, -22033}, {3967, -22033}}, 
     {{3969, -23883}, {3970, -23883}}, {{3972, -25844}, {3973, -25844}}, 
     {{3975, -21839}, {3976, -21839}}, {{3978, -19880}, {3979, -19880}}, 
     {{3981, -15890}, {3982, -15890}}, {{3984, -15911}, {3985, -15911}}, 
     {{3987, -12240}, {3988, -12240}}, {{3990, -16166}, {3991, -16166}}, 
     {{3993, -14148}, {3994, -14148}}, {{3996, -13844}, {3997, -13844}}, 
     {{3999, -11760}, {4000, -11760}}, {{4002, -11792}, {4003, -11792}}, 
     {{4005, -13698}, {4006, -13698}}, {{4008, -13850}, {4009, -13850}}, 
     {{4011, -15915}, {4012, -15915}}, {{4014, -17919}, {4015, -17919}}, 
     {{4017, -21811}, {4018, -21811}}, {{4020, -23696}, {4021, -23696}}, 
     {{4023, -23740}, {4024, -23740}}, {{4026, -21852}, {4027, -21852}}, 
     {{4029, -25926}, {4030, -25926}}, {{4032, -21905}, {4033, -21905}}, 
     {{4035, -19835}, {4036, -19835}}, {{4038, -19904}, {4039, -19904}}, 
     {{4041, -17781}, {4042, -17781}}, {{4044, -18277}, {4045, -18277}}, 
     {{4047, -18297}, {4048, -18297}}, {{4050, -20257}, {4051, -20257}}, 
     {{4053, -24351}, {4054, -24351}}, {{4056, -20320}, {4057, -20320}}, 
     {{4059, -20355}, {4060, -20355}}, {{4062, -20515}, {4063, -20515}}, 
     {{4065, -20548}, {4066, -20548}}, {{4068, -22575}, {4069, -22575}}, 
     {{4071, -20349}, {4072, -20349}}, {{4074, -20220}, {4075, -20220}}, 
     {{4077, -20220}, {4078, -20220}}, {{4080, -20244}, {4081, -20244}}, 
     {{4083, -22226}, {4084, -22226}}, {{4086, -24144}, {4087, -24144}}, 
     {{4089, -24144}, {4090, -24144}}, {{4092, -28326}, {4093, -28326}}, 
     {{4095, -32456}, {4096, -32456}}, {{4098, -32585}, {4099, -32585}}, 
     {{4101, -32478}, {4102, -32478}}, {{4104, -32435}, {4105, -32435}}, 
     {{4107, -28297}, {4108, -28297}}, {{4110, -24036}, {4111, -24036}}, 
     {{4113, -26063}, {4114, -26063}}, {{4116, -24117}, {4117, -24117}}, 
     {{4119, -22166}, {4120, -22166}}, {{4122, -20023}, {4123, -20023}}, 
     {{4125, -22143}, {4126, -22143}}, {{4128, -21808}, {4129, -21808}}, 
     {{4131, -21784}, {4132, -21784}}, {{4134, -21938}, {4135, -21938}}, 
     {{4137, -22123}, {4138, -22123}}, {{4140, -22275}, {4141, -22275}}, 
     {{4143, -20230}, {4144, -20230}}, {{4146, -20367}, {4147, -20367}}, 
     {{4149, -22539}, {4150, -22539}}, {{4152, -20407}, {4153, -20407}}, 
     {{4155, -26605}, {4156, -26605}}, {{4158, -28659}, {4159, -28659}}, 
     {{4161, -32792}, {4162, -32792}}, {{4164, -28593}, {4165, -28593}}, 
     {{4167, -26351}, {4168, -26351}}, {{4170, -22272}, {4171, -22272}}, 
     {{4173, -22309}, {4174, -22309}}, {{4176, -20243}, {4177, -20243}}, 
     {{4179, -22366}, {4180, -22366}}, {{4182, -18186}, {4183, -18186}}, 
     {{4185, -16020}, {4186, -16020}}, {{4188, -11938}, {4189, -11938}}, 
     {{4191, -14171}, {4192, -14171}}, {{4194, -11905}, {4195, -11905}}, 
     {{4197, -7775}, {4198, -7775}}, {{4200, -7852}, {4201, -7852}}, 
     {{4203, -12097}, {4204, -12097}}, {{4206, -14038}, {4207, -14038}}, 
     {{4209, -14111}, {4210, -14111}}, {{4212, -18298}, {4213, -18298}}, 
     {{4215, -18194}, {4216, -18194}}, {{4218, -18372}, {4219, -18372}}, 
     {{4221, -20584}, {4222, -20584}}, {{4224, -16356}, {4225, -16356}}, 
     {{4227, -12038}, {4228, -12038}}, {{4230, -14265}, {4231, -14265}}, 
     {{4233, -18499}, {4234, -18499}}, {{4236, -20596}, {4237, -20596}}, 
     {{4239, -20575}, {4240, -20575}}, {{4242, -20957}, {4243, -20957}}, 
     {{4245, -25149}, {4246, -25149}}, {{4248, -24924}, {4249, -24924}}, 
     {{4251, -24793}, {4252, -24793}}, {{4254, -29117}, {4255, -29117}}, 
     {{4257, -31146}, {4258, -31146}}, {{4260, -31089}, {4261, -31089}}, 
     {{4263, -31059}, {4264, -31059}}, {{4266, -28936}, {4267, -28936}}, 
     {{4269, -24801}, {4270, -24801}}, {{4272, -24665}, {4273, -24665}}, 
     {{4275, -24725}, {4276, -24725}}, {{4278, -24885}, {4279, -24885}}, 
     {{4281, -20583}, {4282, -20583}}, {{4284, -20627}, {4285, -20627}}, 
     {{4287, -14148}, {4288, -14148}}, {{4290, -18483}, {4291, -18483}}, 
     {{4293, -16365}, {4294, -16365}}, {{4296, -16052}, {4297, -16052}}, 
     {{4299, -17974}, {4300, -17974}}, {{4302, -20134}, {4303, -20134}}, 
     {{4305, -15765}, {4306, -15765}}, {{4308, -11574}, {4309, -11574}}, 
     {{4311, -11564}, {4312, -11564}}, {{4314, -11520}, {4315, -11520}}, 
     {{4317, -7087}, {4318, -7087}}, {{4320, -7006}, {4321, -7006}}, 
     {{4323, -4861}, {4324, -4861}}, {{4326, -2659}, {4327, -2659}}, 
     {{4329, -4943}, {4330, -4943}}, {{4332, -5023}, {4333, -5023}}, 
     {{4335, -4886}, {4336, -4886}}, {{4338, -6976}, {4339, -6976}}, 
     {{4341, -7378}, {4342, -7378}}, {{4344, -7780}, {4345, -7780}}, 
     {{4347, -12211}, {4348, -12211}}, {{4350, -14364}, {4351, -14364}}, 
     {{4353, -9915}, {4354, -9915}}, {{4356, -14225}, {4357, -14225}}, 
     {{4359, -11971}, {4360, -11971}}, {{4362, -14274}, {4363, -14274}}, 
     {{4365, -16316}, {4366, -16316}}, {{4368, -16235}, {4369, -16235}}, 
     {{4371, -13953}, {4372, -13953}}, {{4374, -16205}, {4375, -16205}}, 
     {{4377, -14016}, {4378, -14016}}, {{4380, -13843}, {4381, -13843}}, 
     {{4383, -14066}, {4384, -14066}}, {{4386, -9448}, {4387, -9448}}, 
     {{4389, -5161}, {4390, -5161}}, {{4392, -9627}, {4393, -9627}}, 
     {{4395, -9410}, {4396, -9410}}, {{4398, -13740}, {4399, -13740}}, 
     {{4401, -11387}, {4402, -11387}}, {{4404, -15949}, {4405, -15949}}, 
     {{4407, -13500}, {4408, -13500}}, {{4410, -15678}, {4411, -15678}}, 
     {{4413, -11207}, {4414, -11207}}, {{4416, -6663}, {4417, -6663}}, 
     {{4419, -4551}, {4420, -4551}}, {{4422, -4479}, {4423, -4479}}, 
     {{4425, -6749}, {4426, -6749}}, {{4428, -2220}, {4429, -2220}}, 
     {{4431, -4398}, {4432, -4398}}, {{4434, -8852}, {4435, -8852}}, 
     {{4437, -6613}, {4438, -6613}}, {{4440, -6440}, {4441, -6440}}, 
     {{4443, -4221}, {4444, -4221}}, {{4446, -6310}, {4447, -6310}}, 
     {{4449, -6615}, {4450, -6615}}, {{4452, -8725}, {4453, -8725}}, 
     {{4455, -8700}, {4456, -8700}}, {{4458, -13190}, {4459, -13190}}, 
     {{4461, -10995}, {4462, -10995}}, {{4464, -15603}, {4465, -15603}}, 
     {{4467, -13146}, {4468, -13146}}, {{4470, -8739}, {4471, -8739}}, 
     {{4473, -6631}, {4474, -6631}}, {{4476, -4448}, {4477, -4448}}, 
     {{4479, -64}, {4480, -64}}, {{4482, -2220}, {4483, -2220}}, 
     {{4485, -2342}, {4486, -2342}}, {{4488, 2163}, {4489, 2163}}, 
     {{4491, 42}, {4492, 42}}, {{4494, -100}, {4495, -100}}, 
     {{4497, -490}, {4498, -490}}, {{4500, -723}, {4501, -723}}, 
     {{4503, 1507}, {4504, 1507}}, {{4506, -2833}, {4507, -2833}}, 
     {{4509, -5186}, {4510, -5186}}, {{4512, -750}, {4513, -750}}, 
     {{4515, -2907}, {4516, -2907}}, {{4518, -5122}, {4519, -5122}}, 
     {{4521, -9568}, {4522, -9568}}, {{4524, -9657}, {4525, -9657}}, 
     {{4527, -11954}, {4528, -11954}}, {{4530, -7206}, {4531, -7206}}, 
     {{4533, -2725}, {4534, -2725}}, {{4536, 1643}, {4537, 1643}}, 
     {{4539, 3813}, {4540, 3813}}, {{4542, 3583}, {4543, 3583}}, 
     {{4545, 1392}, {4546, 1392}}, {{4548, 1163}, {4549, 1163}}, 
     {{4551, -3418}, {4552, -3418}}, {{4554, -1084}, {4555, -1084}}, 
     {{4557, 1006}, {4558, 1006}}, {{4560, 855}, {4561, 855}}, 
     {{4563, 809}, {4564, 809}}, {{4566, -3606}, {4567, -3606}}, 
     {{4569, -3748}, {4570, -3748}}, {{4572, -3853}, {4573, -3853}}, 
     {{4575, 789}, {4576, 789}}, {{4578, 5358}, {4579, 5358}}, 
     {{4581, 7748}, {4582, 7748}}, {{4584, 3085}, {4585, 3085}}, 
     {{4587, 831}, {4588, 831}}, {{4590, 3283}, {4591, 3283}}, 
     {{4593, 3168}, {4594, 3168}}, {{4596, 7960}, {4597, 7960}}, 
     {{4599, 5578}, {4600, 5578}}, {{4602, 10020}, {4603, 10020}}, 
     {{4605, 5310}, {4606, 5310}}, {{4608, 7634}, {4609, 7634}}, 
     {{4611, 5322}, {4612, 5322}}, {{4614, 5302}, {4615, 5302}}, 
     {{4617, 3069}, {4618, 3069}}, {{4620, 7596}, {4621, 7596}}, 
     {{4623, 5444}, {4624, 5444}}, {{4626, 5444}, {4627, 5444}}, 
     {{4629, 10100}, {4630, 10100}}, {{4632, 9856}, {4633, 9856}}, 
     {{4635, 10016}, {4636, 10016}}, {{4638, 5494}, {4639, 5494}}, 
     {{4641, 5307}, {4642, 5307}}, {{4644, 630}, {4645, 630}}, 
     {{4647, 3075}, {4648, 3075}}, {{4650, 861}, {4651, 861}}, 
     {{4653, -1382}, {4654, -1382}}, {{4656, -3746}, {4657, -3746}}, 
     {{4659, -5829}, {4660, -5829}}, {{4662, -3525}, {4663, -3525}}, 
     {{4665, -8184}, {4666, -8184}}, {{4668, -3452}, {4669, -3452}}, 
     {{4671, -8323}, {4672, -8323}}, {{4674, -8308}, {4675, -8308}}, 
     {{4677, -5960}, {4678, -5960}}, {{4680, -5960}, {4681, -5960}}, 
     {{4683, -3801}, {4684, -3801}}, {{4686, 972}, {4687, 972}}, 
     {{4689, 3210}, {4690, 3210}}, {{4692, 3145}, {4693, 3145}}, 
     {{4695, 3240}, {4696, 3240}}, {{4698, 844}, {4699, 844}}, 
     {{4701, 5214}, {4702, 5214}}, {{4704, 5518}, {4705, 5518}}, 
     {{4707, 5734}, {4708, 5734}}, {{4710, 10323}, {4711, 10323}}, 
     {{4713, 14991}, {4714, 14991}}, {{4716, 15044}, {4717, 15044}}, 
     {{4719, 14958}, {4720, 14958}}, {{4722, 10400}, {4723, 10400}}, 
     {{4725, 7879}, {4726, 7879}}, {{4728, 7955}, {4729, 7955}}, 
     {{4731, 5667}, {4732, 5667}}, {{4734, 3374}, {4735, 3374}}, 
     {{4737, 8241}, {4738, 8241}}, {{4740, 8060}, {4741, 8060}}, 
     {{4743, 12954}, {4744, 12954}}, {{4746, 12659}, {4747, 12659}}, 
     {{4749, 17405}, {4750, 17405}}, {{4752, 15021}, {4753, 15021}}, 
     {{4755, 14809}, {4756, 14809}}, {{4758, 19744}, {4759, 19744}}, 
     {{4761, 17478}, {4762, 17478}}, {{4764, 22168}, {4765, 22168}}, 
     {{4767, 24483}, {4768, 24483}}, {{4770, 26784}, {4771, 26784}}, 
     {{4773, 26857}, {4774, 26857}}, {{4776, 29260}, {4777, 29260}}, 
     {{4779, 34019}, {4780, 34019}}, {{4782, 34246}, {4783, 34246}}, 
     {{4785, 34299}, {4786, 34299}}, {{4788, 34136}, {4789, 34136}}, 
     {{4791, 31876}, {4792, 31876}}, {{4794, 32174}, {4795, 32174}}, 
     {{4797, 29741}, {4798, 29741}}, {{4800, 29907}, {4801, 29907}}, 
     {{4803, 29937}, {4804, 29937}}, {{4806, 29937}, {4807, 29937}}, 
     {{4809, 25199}, {4810, 25199}}, {{4812, 30074}, {4813, 30074}}, 
     {{4815, 25250}, {4816, 25250}}, {{4818, 25256}, {4819, 25256}}, 
     {{4821, 30086}, {4822, 30086}}, {{4824, 29779}, {4825, 29779}}, 
     {{4827, 29893}, {4828, 29893}}, {{4830, 29743}, {4831, 29743}}, 
     {{4833, 27231}, {4834, 27231}}, {{4836, 32009}, {4837, 32009}}, 
     {{4839, 34604}, {4840, 34604}}, {{4842, 37174}, {4843, 37174}}, 
     {{4845, 41986}, {4846, 41986}}, {{4848, 46806}, {4849, 46806}}, 
     {{4851, 49080}, {4852, 49080}}, {{4854, 49071}, {4855, 49071}}, 
     {{4857, 53831}, {4858, 53831}}, {{4860, 53602}, {4861, 53602}}, 
     {{4863, 56237}, {4864, 56237}}, {{4866, 51328}, {4867, 51328}}, 
     {{4869, 53848}, {4870, 53848}}, {{4872, 48931}, {4873, 48931}}, 
     {{4875, 53886}, {4876, 53886}}, {{4878, 51430}, {4879, 51430}}, 
     {{4881, 51318}, {4882, 51318}}, {{4884, 56204}, {4885, 56204}}, 
     {{4887, 56146}, {4888, 56146}}, {{4890, 56063}, {4891, 56063}}, 
     {{4893, 56178}, {4894, 56178}}, {{4896, 56340}, {4897, 56340}}, 
     {{4899, 54085}, {4900, 54085}}, {{4902, 56605}, {4903, 56605}}, 
     {{4905, 54249}, {4906, 54249}}, {{4908, 54107}, {4909, 54107}}, 
     {{4911, 51909}, {4912, 51909}}, {{4914, 51909}, {4915, 51909}}, 
     {{4917, 51682}, {4918, 51682}}, {{4920, 51618}, {4921, 51618}}, 
     {{4923, 46580}, {4924, 46580}}, {{4926, 44214}, {4927, 44214}}, 
     {{4929, 44255}, {4930, 44255}}, {{4932, 44360}, {4933, 44360}}, 
     {{4935, 46795}, {4936, 46795}}, {{4938, 41697}, {4939, 41697}}, 
     {{4941, 44106}, {4942, 44106}}, {{4944, 39042}, {4945, 39042}}, 
     {{4947, 36767}, {4948, 36767}}, {{4950, 36767}, {4951, 36767}}, 
     {{4953, 31851}, {4954, 31851}}, {{4956, 36802}, {4957, 36802}}, 
     {{4959, 31836}, {4960, 31836}}, {{4962, 29314}, {4963, 29314}}, 
     {{4965, 29398}, {4966, 29398}}, {{4968, 24368}, {4969, 24368}}, 
     {{4971, 26733}, {4972, 26733}}, {{4974, 21797}, {4975, 21797}}, 
     {{4977, 21797}, {4978, 21797}}, {{4980, 21868}, {4981, 21868}}, 
     {{4983, 19497}, {4984, 19497}}, {{4986, 21941}, {4987, 21941}}, 
     {{4989, 22027}, {4990, 22027}}, {{4992, 17086}, {4993, 17086}}, 
     {{4995, 12092}, {4996, 12092}}, {{4998, 14630}, {4999, 14630}}, 
     {{5001, 14676}, {5002, 14676}}, {{5004, 9683}, {5005, 9683}}, 
     {{5007, 17117}, {5008, 17117}}, {{5010, 17137}, {5011, 17137}}, 
     {{5013, 14622}, {5014, 14622}}, {{5016, 9597}, {5017, 9597}}, 
     {{5019, 7143}, {5020, 7143}}, {{5022, 4635}, {5023, 4635}}, 
     {{5025, 2273}, {5026, 2273}}, {{5028, 2316}, {5029, 2316}}, 
     {{5031, 2302}, {5032, 2302}}, {{5034, 2463}, {5035, 2463}}, 
     {{5037, -2492}, {5038, -2492}}, {{5040, -7514}, {5041, -7514}}, 
     {{5043, -5087}, {5044, -5087}}, {{5046, -2491}, {5047, -2491}}, 
     {{5049, -2491}, {5050, -2491}}, {{5052, -4935}, {5053, -4935}}, 
     {{5055, -4961}, {5056, -4961}}, {{5058, -2335}, {5059, -2335}}, 
     {{5061, -7455}, {5062, -7455}}, {{5064, -2418}, {5065, -2418}}, 
     {{5067, -2327}, {5068, -2327}}, {{5070, 228}, {5071, 228}}, 
     {{5073, 403}, {5074, 403}}, {{5076, -2097}, {5077, -2097}}, 
     {{5079, 374}, {5080, 374}}, {{5082, -2165}, {5083, -2165}}, 
     {{5085, -4781}, {5086, -4781}}, {{5088, -4764}, {5089, -4764}}, 
     {{5091, -2481}, {5092, -2481}}, {{5094, 42}, {5095, 42}}, 
     {{5097, 5116}, {5098, 5116}}, {{5100, 5079}, {5101, 5079}}, 
     {{5103, 5028}, {5104, 5028}}, {{5106, 10208}, {5107, 10208}}, 
     {{5109, 5136}, {5110, 5136}}, {{5112, 10230}, {5113, 10230}}, 
     {{5115, 12574}, {5116, 12574}}, {{5118, 7559}, {5119, 7559}}, 
     {{5121, 4900}, {5122, 4900}}, {{5124, 4922}, {5125, 4922}}, 
     {{5127, 4780}, {5128, 4780}}, {{5130, 7449}, {5131, 7449}}, 
     {{5133, 7234}, {5134, 7234}}, {{5136, 2168}, {5137, 2168}}, 
     {{5139, 2206}, {5140, 2206}}, {{5142, 2190}, {5143, 2190}}, 
     {{5145, 4802}, {5146, 4802}}, {{5148, -396}, {5149, -396}}, 
     {{5151, -378}, {5152, -378}}, {{5154, -5500}, {5155, -5500}}, 
     {{5157, -2887}, {5158, -2887}}, {{5160, -2782}, {5161, -2782}}, 
     {{5163, 2}, {5164, 2}}, {{5166, 2609}, {5167, 2609}}, 
     {{5169, 2692}, {5170, 2692}}, {{5172, 2487}, {5173, 2487}}, 
     {{5175, 2509}, {5176, 2509}}, {{5178, 2573}, {5179, 2573}}, 
     {{5181, -2601}, {5182, -2601}}, {{5184, 2528}, {5185, 2528}}, 
     {{5187, 5136}, {5188, 5136}}, {{5190, 5032}, {5191, 5032}}, 
     {{5193, 7696}, {5194, 7696}}, {{5196, 10324}, {5197, 10324}}, 
     {{5199, 7667}, {5200, 7667}}, {{5202, 10430}, {5203, 10430}}, 
     {{5205, 7813}, {5206, 7813}}, {{5208, 7791}, {5209, 7791}}, 
     {{5211, 2583}, {5212, 2583}}, {{5214, 7786}, {5215, 7786}}, 
     {{5217, 2615}, {5218, 2615}}, {{5220, 7834}, {5221, 7834}}, 
     {{5223, 10295}, {5224, 10295}}, {{5226, 12823}, {5227, 12823}}, 
     {{5229, 10117}, {5230, 10117}}, {{5232, 4942}, {5233, 4942}}, 
     {{5235, 2505}, {5236, 2505}}, {{5238, -160}, {5239, -160}}, 
     {{5241, 2512}, {5242, 2512}}, {{5244, 5009}, {5245, 5009}}, 
     {{5247, 4899}, {5248, 4899}}, {{5250, 7572}, {5251, 7572}}, 
     {{5253, 7403}, {5254, 7403}}, {{5256, 7402}, {5257, 7402}}, 
     {{5259, 10138}, {5260, 10138}}, {{5262, 4829}, {5263, 4829}}, 
     {{5265, 7476}, {5266, 7476}}, {{5268, 12714}, {5269, 12714}}, 
     {{5271, 15344}, {5272, 15344}}, {{5274, 12690}, {5275, 12690}}, 
     {{5277, 15315}, {5278, 15315}}, {{5280, 15277}, {5281, 15277}}, 
     {{5283, 10019}, {5284, 10019}}, {{5286, 4612}, {5287, 4612}}, 
     {{5289, 4434}, {5290, 4434}}, {{5292, 1711}, {5293, 1711}}, 
     {{5295, 4254}, {5296, 4254}}, {{5298, -1138}, {5299, -1138}}, 
     {{5301, 1545}, {5302, 1545}}, {{5304, -3798}, {5305, -3798}}, 
     {{5307, -6443}, {5308, -6443}}, {{5310, -9091}, {5311, -9091}}, 
     {{5313, -3712}, {5314, -3712}}, {{5316, 1602}, {5317, 1602}}, 
     {{5319, 6923}, {5320, 6923}}, {{5322, 6940}, {5323, 6940}}, 
     {{5325, 4308}, {5326, 4308}}, {{5328, 9827}, {5329, 9827}}, 
     {{5331, 15279}, {5332, 15279}}, {{5334, 15246}, {5335, 15246}}, 
     {{5337, 12720}, {5338, 12720}}, {{5340, 12851}, {5341, 12851}}, 
     {{5343, 12767}, {5344, 12767}}, {{5346, 15522}, {5347, 15522}}, 
     {{5349, 15681}, {5350, 15681}}, {{5352, 12953}, {5353, 12953}}, 
     {{5355, 18319}, {5356, 18319}}, {{5358, 23653}, {5359, 23653}}, 
     {{5361, 28959}, {5362, 28959}}, {{5364, 28899}, {5365, 28899}}, 
     {{5367, 31561}, {5368, 31561}}, {{5370, 31598}, {5371, 31598}}, 
     {{5373, 34319}, {5374, 34319}}, {{5376, 37033}, {5377, 37033}}, 
     {{5379, 39652}, {5380, 39652}}, {{5382, 36978}, {5383, 36978}}, 
     {{5385, 37062}, {5386, 37062}}, {{5388, 37125}, {5389, 37125}}, 
     {{5391, 39850}, {5392, 39850}}, {{5394, 39788}, {5395, 39788}}, 
     {{5397, 34420}, {5398, 34420}}, {{5400, 34430}, {5401, 34430}}, 
     {{5403, 37132}, {5404, 37132}}, {{5406, 37157}, {5407, 37157}}, 
     {{5409, 34490}, {5410, 34490}}, {{5412, 34474}, {5413, 34474}}, 
     {{5415, 34394}, {5416, 34394}}, {{5418, 31665}, {5419, 31665}}, 
     {{5421, 26222}, {5422, 26222}}, {{5424, 26168}, {5425, 26168}}, 
     {{5427, 28907}, {5428, 28907}}, {{5430, 34358}, {5431, 34358}}, 
     {{5433, 34381}, {5434, 34381}}, {{5436, 39845}, {5437, 39845}}, 
     {{5439, 39862}, {5440, 39862}}, {{5442, 34438}, {5443, 34438}}, 
     {{5445, 31704}, {5446, 31704}}, {{5448, 31653}, {5449, 31653}}, 
     {{5451, 26131}, {5452, 26131}}, {{5454, 23410}, {5455, 23410}}, 
     {{5457, 23487}, {5458, 23487}}, {{5460, 29000}, {5461, 29000}}, 
     {{5463, 34485}, {5464, 34485}}, {{5466, 34483}, {5467, 34483}}, 
     {{5469, 34474}, {5470, 34474}}, {{5472, 29022}, {5473, 29022}}, 
     {{5475, 34474}, {5476, 34474}}, {{5478, 34495}, {5479, 34495}}, 
     {{5481, 31768}, {5482, 31768}}, {{5484, 31762}, {5485, 31762}}, 
     {{5487, 29027}, {5488, 29027}}, {{5490, 31751}, {5491, 31751}}, 
     {{5493, 34500}, {5494, 34500}}, {{5496, 28985}, {5497, 28985}}, 
     {{5499, 34503}, {5500, 34503}}, {{5502, 34460}, {5503, 34460}}, 
     {{5505, 28986}, {5506, 28986}}, {{5508, 29005}, {5509, 29005}}, 
     {{5511, 31810}, {5512, 31810}}, {{5514, 31821}, {5515, 31821}}, 
     {{5517, 34599}, {5518, 34599}}, {{5520, 29055}, {5521, 29055}}, 
     {{5523, 20762}, {5524, 20762}}, {{5526, 20762}, {5527, 20762}}, 
     {{5529, 15218}, {5530, 15218}}, {{5532, 15180}, {5533, 15180}}, 
     {{5535, 20708}, {5536, 20708}}, {{5538, 23507}, {5539, 23507}}, 
     {{5541, 29068}, {5542, 29068}}, {{5544, 29108}, {5545, 29108}}, 
     {{5547, 29084}, {5548, 29084}}, {{5550, 31909}, {5551, 31909}}, 
     {{5553, 29153}, {5554, 29153}}, {{5556, 29226}, {5557, 29226}}, 
     {{5559, 20856}, {5560, 20856}}, {{5562, 23623}, {5563, 23623}}, 
     {{5565, 23657}, {5566, 23657}}, {{5568, 26449}, {5569, 26449}}, 
     {{5571, 20875}, {5572, 20875}}, {{5574, 15285}, {5575, 15285}}, 
     {{5577, 15285}, {5578, 15285}}, {{5580, 20865}, {5581, 20865}}, 
     {{5583, 23698}, {5584, 23698}}, {{5586, 26497}, {5587, 26497}}, 
     {{5589, 29254}, {5590, 29254}}, {{5592, 29221}, {5593, 29221}}, 
     {{5595, 26464}, {5596, 26464}}, {{5598, 29298}, {5599, 29298}}, 
     {{5601, 34868}, {5602, 34868}}, {{5604, 40515}, {5605, 40515}}, 
     {{5607, 40541}, {5608, 40541}}, {{5610, 40533}, {5611, 40533}}, 
     {{5613, 46144}, {5614, 46144}}, {{5616, 46130}, {5617, 46130}}, 
     {{5619, 51796}, {5620, 51796}}, {{5622, 46114}, {5623, 46114}}, 
     {{5625, 43332}, {5626, 43332}}, {{5628, 43366}, {5629, 43366}}, 
     {{5631, 46221}, {5632, 46221}}, {{5634, 49042}, {5635, 49042}}, 
     {{5637, 51859}, {5638, 51859}}, {{5640, 51897}, {5641, 51897}}, 
     {{5643, 51969}, {5644, 51969}}, {{5646, 51924}, {5647, 51924}}, 
     {{5649, 46255}, {5650, 46255}}, {{5652, 43455}, {5653, 43455}}, 
     {{5655, 40638}, {5656, 40638}}, {{5658, 40664}, {5659, 40664}}, 
     {{5661, 37814}, {5662, 37814}}, {{5664, 37916}, {5665, 37916}}, 
     {{5667, 40889}, {5668, 40889}}, {{5670, 38034}, {5671, 38034}}, 
     {{5673, 38009}, {5674, 38009}}, {{5676, 40810}, {5677, 40810}}, 
     {{5679, 40817}, {5680, 40817}}, {{5682, 35143}, {5683, 35143}}, 
     {{5685, 29461}, {5686, 29461}}, {{5688, 32269}, {5689, 32269}}, 
     {{5691, 23702}, {5692, 23702}}, {{5694, 23749}, {5695, 23749}}, 
     {{5697, 20921}, {5698, 20921}}, {{5700, 26608}, {5701, 26608}}, 
     {{5703, 29451}, {5704, 29451}}, {{5706, 26605}, {5707, 26605}}, 
     {{5709, 26613}, {5710, 26613}}, {{5712, 20887}, {5713, 20887}}, 
     {{5715, 26588}, {5716, 26588}}, {{5718, 20860}, {5719, 20860}}, 
     {{5721, 20856}, {5722, 20856}}, {{5724, 26591}, {5725, 26591}}, 
     {{5727, 20852}, {5728, 20852}}, {{5730, 26621}, {5731, 26621}}, 
     {{5733, 29483}, {5734, 29483}}, {{5736, 23741}, {5737, 23741}}, 
     {{5739, 20905}, {5740, 20905}}, {{5742, 18047}, {5743, 18047}}, 
     {{5745, 12276}, {5746, 12276}}, {{5748, 15139}, {5749, 15139}}, 
     {{5751, 12267}, {5752, 12267}}, {{5754, 17987}, {5755, 17987}}, 
     {{5757, 18032}, {5758, 18032}}, {{5760, 23841}, {5761, 23841}}, 
     {{5763, 20948}, {5764, 20948}}, {{5766, 23837}, {5767, 23837}}, 
     {{5769, 26708}, {5770, 26708}}, {{5772, 26732}, {5773, 26732}}, 
     {{5775, 32523}, {5776, 32523}}, {{5778, 35429}, {5779, 35429}}, 
     {{5781, 29630}, {5782, 29630}}, {{5784, 26724}, {5785, 26724}}, 
     {{5787, 20908}, {5788, 20908}}, {{5790, 26697}, {5791, 26697}}, 
     {{5793, 26663}, {5794, 26663}}, {{5796, 26741}, {5797, 26741}}, 
     {{5799, 23875}, {5800, 23875}}, {{5802, 18059}, {5803, 18059}}, 
     {{5805, 20984}, {5806, 20984}}, {{5808, 20928}, {5809, 20928}}, 
     {{5811, 23788}, {5812, 23788}}, {{5814, 20866}, {5815, 20866}}, 
     {{5817, 20833}, {5818, 20833}}, {{5820, 23738}, {5821, 23738}}, 
     {{5823, 17898}, {5824, 17898}}, {{5826, 14999}, {5827, 14999}}, 
     {{5829, 9145}, {5830, 9145}}, {{5832, 12050}, {5833, 12050}}, 
     {{5835, 14980}, {5836, 14980}}, {{5838, 20823}, {5839, 20823}}, 
     {{5841, 17900}, {5842, 17900}}, {{5844, 12041}, {5845, 12041}}, 
     {{5847, 9155}, {5848, 9155}}, {{5850, 6207}, {5851, 6207}}, 
     {{5853, 6216}, {5854, 6216}}, {{5856, 12092}, {5857, 12092}}, 
     {{5859, 6198}, {5860, 6198}}, {{5862, 306}, {5863, 306}}, 
     {{5865, 328}, {5866, 328}}, {{5868, -5541}, {5869, -5541}}, 
     {{5871, -14338}, {5872, -14338}}, {{5874, -8485}, {5875, -8485}}, 
     {{5877, -8485}, {5878, -8485}}, {{5880, -8468}, {5881, -8468}}, 
     {{5883, -17322}, {5884, -17322}}, {{5886, -20251}, {5887, -20251}}, 
     {{5889, -23188}, {5890, -23188}}, {{5892, -17283}, {5893, -17283}}, 
     {{5895, -17309}, {5896, -17309}}, {{5898, -23228}, {5899, -23228}}, 
     {{5901, -23229}, {5902, -23229}}, {{5904, -29132}, {5905, -29132}}, 
     {{5907, -26159}, {5908, -26159}}, {{5910, -20207}, {5911, -20207}}, 
     {{5913, -17246}, {5914, -17246}}, {{5916, -14256}, {5917, -14256}}, 
     {{5919, -11373}, {5920, -11373}}, {{5922, -8372}, {5923, -8372}}, 
     {{5925, -11289}, {5926, -11289}}, {{5928, -11307}, {5929, -11307}}, 
     {{5931, -14296}, {5932, -14296}}, {{5934, -8344}, {5935, -8344}}, 
     {{5937, -2433}, {5938, -2433}}, {{5940, -2461}, {5941, -2461}}, 
     {{5943, 516}, {5944, 516}}, {{5946, -5426}, {5947, -5426}}, 
     {{5949, -2472}, {5950, -2472}}, {{5952, 512}, {5953, 512}}, 
     {{5955, -8464}, {5956, -8464}}, {{5958, -11454}, {5959, -11454}}, 
     {{5961, -5445}, {5962, -5445}}, {{5964, -5487}, {5965, -5487}}, 
     {{5967, -5490}, {5968, -5490}}, {{5970, 502}, {5971, 502}}, 
     {{5973, 513}, {5974, 513}}, {{5976, -2476}, {5977, -2476}}, 
     {{5979, 3510}, {5980, 3510}}, {{5982, -2487}, {5983, -2487}}, 
     {{5985, 508}, {5986, 508}}, {{5988, -5488}, {5989, -5488}}, 
     {{5991, -2495}, {5992, -2495}}, {{5994, 510}, {5995, 510}}, 
     {{5997, 513}, {5998, 513}}, {{6000, 6529}, {6001, 6529}}, 
     {{6003, 12549}, {6004, 12549}}, {{6006, 12546}, {6007, 12546}}, 
     {{6009, 12568}, {6010, 12568}}, {{6012, 6557}, {6013, 6557}}, 
     {{6015, 3548}, {6016, 3548}}, {{6018, 9576}, {6019, 9576}}, 
     {{6021, 12592}, {6022, 12592}}, {{6024, 18638}, {6025, 18638}}, 
     {{6027, 15616}, {6028, 15616}}, {{6030, 12597}, {6031, 12597}}, 
     {{6033, 18623}, {6034, 18623}}, {{6036, 12564}, {6037, 12564}}, 
     {{6039, 12549}, {6040, 12549}}, {{6042, 18665}, {6043, 18665}}, 
     {{6045, 18588}, {6046, 18588}}, {{6048, 18667}, {6049, 18667}}, 
     {{6051, 24824}, {6052, 24824}}, {{6054, 18773}, {6055, 18773}}, 
     {{6057, 15778}, {6058, 15778}}, {{6060, 15780}, {6061, 15780}}, 
     {{6063, 6930}, {6064, 6930}}, {{6066, 9948}, {6067, 9948}}, 
     {{6069, 6766}, {6070, 6766}}, {{6072, 6426}, {6073, 6426}}, 
     {{6075, 6465}, {6076, 6465}}, {{6078, 6273}, {6079, 6273}}, 
     {{6081, 6547}, {6082, 6547}}, {{6084, 6695}, {6085, 6695}}, 
     {{6087, 10312}, {6088, 10312}}, {{6090, 4141}, {6091, 4141}}, 
     {{6093, 1081}, {6094, 1081}}, {{6096, -4787}, {6097, -4787}}, 
     {{6099, -7594}, {6100, -7594}}, {{6102, -10695}, {6103, -10695}}, 
     {{6105, -4759}, {6106, -4759}}, {{6108, -4168}, {6109, -4168}}, 
     {{6111, 2098}, {6112, 2098}}, {{6114, -4246}, {6115, -4246}}, 
     {{6117, 1616}, {6118, 1616}}, {{6120, 7496}, {6121, 7496}}, 
     {{6123, 4482}, {6124, 4482}}, {{6126, 1252}, {6127, 1252}}, 
     {{6129, 4144}, {6130, 4144}}, {{6132, -2230}, {6133, -2230}}, 
     {{6135, -4830}, {6136, -4830}}, {{6138, -4830}, {6139, -4830}}, 
     {{6141, -4893}, {6142, -4893}}, {{6144, -11049}, {6145, -11049}}, 
     {{6147, -11336}, {6148, -11336}}, {{6150, -14612}, {6151, -14612}}, 
     {{6153, -20717}, {6154, -20717}}, {{6156, -20649}, {6157, -20649}}, 
     {{6159, -11357}, {6160, -11357}}, {{6162, -5008}, {6163, -5008}}, 
     {{6165, -7993}, {6166, -7993}}, {{6168, -1694}, {6169, -1694}}, 
     {{6171, -1984}, {6172, -1984}}, {{6174, -5129}, {6175, -5129}}, 
     {{6177, -8174}, {6178, -8174}}, {{6180, -1897}, {6181, -1897}}, 
     {{6183, -1737}, {6184, -1737}}, {{6186, -1975}, {6187, -1975}}, 
     {{6189, 4199}, {6190, 4199}}, {{6192, 4230}, {6193, 4230}}, 
     {{6195, 7639}, {6196, 7639}}, {{6198, 1335}, {6199, 1335}}, 
     {{6201, -1738}, {6202, -1738}}, {{6204, -7936}, {6205, -7936}}, 
     {{6207, -10771}, {6208, -10771}}, {{6210, -7787}, {6211, -7787}}, 
     {{6213, -14396}, {6214, -14396}}, {{6216, -20246}, {6217, -20246}}, 
     {{6219, -20227}, {6220, -20227}}, {{6222, -20115}, {6223, -20115}}, 
     {{6225, -20115}, {6226, -20115}}, {{6228, -19235}, {6229, -19235}}, 
     {{6231, -22025}, {6232, -22025}}, {{6234, -22297}, {6235, -22297}}, 
     {{6237, -25462}, {6238, -25462}}, {{6240, -19314}, {6241, -19314}}, 
     {{6243, -12859}, {6244, -12859}}, {{6246, -9713}, {6247, -9713}}, 
     {{6249, -9302}, {6250, -9302}}, {{6252, -12268}, {6253, -12268}}, 
     {{6255, -15764}, {6256, -15764}}, {{6258, -16283}, {6259, -16283}}, 
     {{6261, -10021}, {6262, -10021}}, {{6264, -16292}, {6265, -16292}}, 
     {{6267, -19560}, {6268, -19560}}, {{6270, -25830}, {6271, -25830}}, 
     {{6273, -28775}, {6274, -28775}}, {{6276, -25708}, {6277, -25708}}, 
     {{6279, -29024}, {6280, -29024}}, {{6282, -25883}, {6283, -25883}}, 
     {{6285, -25650}, {6286, -25650}}, {{6288, -32240}, {6289, -32240}}, 
     {{6291, -26013}, {6292, -26013}}, {{6294, -32332}, {6295, -32332}}, 
     {{6297, -26030}, {6298, -26030}}, {{6300, -32310}, {6301, -32310}}, 
     {{6303, -41676}, {6304, -41676}}, {{6306, -48155}, {6307, -48155}}, 
     {{6309, -51198}, {6310, -51198}}, {{6312, -57387}, {6313, -57387}}, 
     {{6315, -54758}, {6316, -54758}}, {{6318, -57930}, {6319, -57930}}, 
     {{6321, -54742}, {6322, -54742}}, {{6324, -61124}, {6325, -61124}}, 
     {{6327, -58175}, {6328, -58175}}, {{6330, -58040}, {6331, -58040}}, 
     {{6333, -51321}, {6334, -51321}}, {{6336, -50965}, {6337, -50965}}, 
     {{6339, -47892}, {6340, -47892}}, {{6342, -41599}, {6343, -41599}}, 
     {{6345, -44746}, {6346, -44746}}, {{6348, -44751}, {6349, -44751}}, 
     {{6351, -44573}, {6352, -44573}}, {{6354, -47858}, {6355, -47858}}, 
     {{6357, -54281}, {6358, -54281}}, {{6360, -57090}, {6361, -57090}}, 
     {{6363, -57517}, {6364, -57517}}, {{6366, -63882}, {6367, -63882}}, 
     {{6369, -70241}, {6370, -70241}}, {{6372, -67134}, {6373, -67134}}, 
     {{6375, -67051}, {6376, -67051}}, {{6378, -67599}, {6379, -67599}}, 
     {{6381, -70789}, {6382, -70789}}, {{6384, -64445}, {6385, -64445}}, 
     {{6387, -61493}, {6388, -61493}}, {{6390, -64743}, {6391, -64743}}, 
     {{6393, -64450}, {6394, -64450}}, {{6396, -64761}, {6397, -64761}}, 
     {{6399, -71107}, {6400, -71107}}, {{6402, -64795}, {6403, -64795}}, 
     {{6405, -58360}, {6406, -58360}}, {{6408, -52035}, {6409, -52035}}, 
     {{6411, -55282}, {6412, -55282}}, {{6414, -58702}, {6415, -58702}}, 
     {{6417, -55433}, {6418, -55433}}, {{6420, -52362}, {6421, -52362}}, 
     {{6423, -52369}, {6424, -52369}}, {{6426, -52369}, {6427, -52369}}, 
     {{6429, -52722}, {6430, -52722}}, {{6432, -53047}, {6433, -53047}}, 
     {{6435, -46570}, {6436, -46570}}, {{6438, -40355}, {6439, -40355}}, 
     {{6441, -39970}, {6442, -39970}}, {{6444, -33630}, {6445, -33630}}, 
     {{6447, -36807}, {6448, -36807}}, {{6450, -40189}, {6451, -40189}}, 
     {{6453, -43406}, {6454, -43406}}, {{6456, -43643}, {6457, -43643}}, 
     {{6459, -34084}, {6460, -34084}}, {{6462, -37586}, {6463, -37586}}, 
     {{6465, -37530}, {6466, -37530}}, {{6468, -37655}, {6469, -37655}}, 
     {{6471, -44593}, {6472, -44593}}, {{6474, -44761}, {6475, -44761}}, 
     {{6477, -47980}, {6478, -47980}}, {{6480, -54285}, {6481, -54285}}, 
     {{6483, -56974}, {6484, -56974}}, {{6486, -50257}, {6487, -50257}}, 
     {{6489, -47276}, {6490, -47276}}, {{6492, -47171}, {6493, -47171}}, 
     {{6495, -50507}, {6496, -50507}}, {{6498, -47184}, {6499, -47184}}, 
     {{6501, -47132}, {6502, -47132}}, {{6504, -40460}, {6505, -40460}}, 
     {{6507, -34078}, {6508, -34078}}, {{6510, -34360}, {6511, -34360}}, 
     {{6513, -34513}, {6514, -34513}}, {{6516, -27878}, {6517, -27878}}, 
     {{6519, -27500}, {6520, -27500}}, {{6522, -34301}, {6523, -34301}}, 
     {{6525, -31488}, {6526, -31488}}, {{6528, -31153}, {6529, -31153}}, 
     {{6531, -40997}, {6532, -40997}}, {{6534, -37684}, {6535, -37684}}, 
     {{6537, -31329}, {6538, -31329}}, {{6540, -31188}, {6541, -31188}}, 
     {{6543, -24412}, {6544, -24412}}, {{6546, -24083}, {6547, -24083}}, 
     {{6549, -30670}, {6550, -30670}}, {{6552, -34020}, {6553, -34020}}, 
     {{6555, -37848}, {6556, -37848}}, {{6558, -37834}, {6559, -37834}}, 
     {{6561, -34546}, {6562, -34546}}, {{6564, -40836}, {6565, -40836}}, 
     {{6567, -47449}, {6568, -47449}}, {{6570, -50552}, {6571, -50552}}, 
     {{6573, -56988}, {6574, -56988}}, {{6576, -60054}, {6577, -60054}}, 
     {{6579, -59843}, {6580, -59843}}, {{6582, -66415}, {6583, -66415}}, 
     {{6585, -66413}, {6586, -66413}}, {{6588, -65890}, {6589, -65890}}, 
     {{6591, -66606}, {6592, -66606}}, {{6594, -59869}, {6595, -59869}}, 
     {{6597, -56571}, {6598, -56571}}, {{6600, -56577}, {6601, -56577}}, 
     {{6603, -60070}, {6604, -60070}}, {{6606, -56777}, {6607, -56777}}, 
     {{6609, -56539}, {6610, -56539}}, {{6612, -56642}, {6613, -56642}}, 
     {{6615, -49976}, {6616, -49976}}, {{6618, -50239}, {6619, -50239}}, 
     {{6621, -50498}, {6622, -50498}}, {{6624, -43791}, {6625, -43791}}, 
     {{6627, -40396}, {6628, -40396}}, {{6630, -40266}, {6631, -40266}}, 
     {{6633, -36960}, {6634, -36960}}, {{6636, -36896}, {6637, -36896}}, 
     {{6639, -33641}, {6640, -33641}}, {{6642, -30015}, {6643, -30015}}, 
     {{6645, -36374}, {6646, -36374}}, {{6648, -33088}, {6649, -33088}}, 
     {{6651, -29578}, {6652, -29578}}, {{6654, -36224}, {6655, -36224}}, 
     {{6657, -39653}, {6658, -39653}}, {{6660, -39710}, {6661, -39710}}, 
     {{6663, -36004}, {6664, -36004}}, {{6666, -36583}, {6667, -36583}}, 
     {{6669, -33099}, {6670, -33099}}, {{6672, -26281}, {6673, -26281}}, 
     {{6675, -33062}, {6676, -33062}}, {{6678, -30006}, {6679, -30006}}, 
     {{6681, -36806}, {6682, -36806}}, {{6684, -36960}, {6685, -36960}}, 
     {{6687, -36915}, {6688, -36915}}, {{6690, -36840}, {6691, -36840}}, 
     {{6693, -43821}, {6694, -43821}}, {{6696, -43886}, {6697, -43886}}, 
     {{6699, -41029}, {6700, -41029}}, {{6702, -47586}, {6703, -47586}}, 
     {{6705, -50834}, {6706, -50834}}, {{6708, -50709}, {6709, -50709}}, 
     {{6711, -47413}, {6712, -47413}}, {{6714, -47413}, {6715, -47413}}, 
     {{6717, -47282}, {6718, -47282}}, {{6720, -47150}, {6721, -47150}}, 
     {{6723, -47026}, {6724, -47026}}, {{6726, -43858}, {6727, -43858}}, 
     {{6729, -40435}, {6730, -40435}}, {{6732, -40749}, {6733, -40749}}, 
     {{6735, -44234}, {6736, -44234}}, {{6738, -50973}, {6739, -50973}}, 
     {{6741, -47427}, {6742, -47427}}, {{6744, -40589}, {6745, -40589}}, 
     {{6747, -43810}, {6748, -43810}}, {{6750, -40367}, {6751, -40367}}, 
     {{6753, -33472}, {6754, -33472}}, {{6756, -40056}, {6757, -40056}}, 
     {{6759, -39642}, {6760, -39642}}, {{6762, -42993}, {6763, -42993}}, 
     {{6765, -43652}, {6766, -43652}}, {{6768, -43526}, {6769, -43526}}, 
     {{6771, -46911}, {6772, -46911}}, {{6774, -46432}, {6775, -46432}}, 
     {{6777, -46432}, {6778, -46432}}, {{6780, -46624}, {6781, -46624}}, 
     {{6783, -42886}, {6784, -42886}}, {{6786, -46323}, {6787, -46323}}, 
     {{6789, -45951}, {6790, -45951}}, {{6792, -46112}, {6793, -46112}}, 
     {{6795, -53098}, {6796, -53098}}, {{6798, -46276}, {6799, -46276}}, 
     {{6801, -39194}, {6802, -39194}}, {{6804, -46179}, {6805, -46179}}, 
     {{6807, -42946}, {6808, -42946}}, {{6810, -35909}, {6811, -35909}}, 
     {{6813, -35909}, {6814, -35909}}, {{6816, -35452}, {6817, -35452}}, 
     {{6819, -31711}, {6820, -31711}}, {{6822, -28338}, {6823, -28338}}, 
     {{6825, -31553}, {6826, -31553}}, {{6828, -31743}, {6829, -31743}}, 
     {{6831, -38358}, {6832, -38358}}, {{6834, -38214}, {6835, -38214}}, 
     {{6837, -38460}, {6838, -38460}}, {{6840, -38217}, {6841, -38217}}, 
     {{6843, -41232}, {6844, -41232}}, {{6846, -37702}, {6847, -37702}}, 
     {{6849, -34309}, {6850, -34309}}, {{6852, -37512}, {6853, -37512}}, 
     {{6855, -47594}, {6856, -47594}}, {{6858, -50912}, {6859, -50912}}, 
     {{6861, -47583}, {6862, -47583}}, {{6864, -54556}, {6865, -54556}}, 
     {{6867, -47484}, {6868, -47484}}, {{6870, -47696}, {6871, -47696}}, 
     {{6873, -54873}, {6874, -54873}}, {{6876, -58314}, {6877, -58314}}, 
     {{6879, -58081}, {6880, -58081}}, {{6882, -50978}, {6883, -50978}}, 
     {{6885, -54094}, {6886, -54094}}, {{6888, -53666}, {6889, -53666}}, 
     {{6891, -46677}, {6892, -46677}}, {{6894, -43141}, {6895, -43141}}, 
     {{6897, -46785}, {6898, -46785}}, {{6900, -46559}, {6901, -46559}}, 
     {{6903, -39487}, {6904, -39487}}, {{6906, -40086}, {6907, -40086}}, 
     {{6909, -43466}, {6910, -43466}}, {{6912, -50441}, {6913, -50441}}, 
     {{6915, -46908}, {6916, -46908}}, {{6918, -54023}, {6919, -54023}}, 
     {{6921, -57124}, {6922, -57124}}, {{6924, -56932}, {6925, -56932}}, 
     {{6927, -49768}, {6928, -49768}}, {{6930, -49768}, {6931, -49768}}, 
     {{6933, -42700}, {6934, -42700}}, {{6936, -42740}, {6937, -42740}}, 
     {{6939, -35722}, {6940, -35722}}, {{6942, -28652}, {6943, -28652}}, 
     {{6945, -28764}, {6946, -28764}}, {{6948, -35843}, {6949, -35843}}, 
     {{6951, -42849}, {6952, -42849}}, {{6954, -36122}, {6955, -36122}}, 
     {{6957, -39660}, {6958, -39660}}, {{6960, -43111}, {6961, -43111}}, 
     {{6963, -50180}, {6964, -50180}}, {{6966, -53488}, {6967, -53488}}, 
     {{6969, -60473}, {6970, -60473}}, {{6972, -60156}, {6973, -60156}}, 
     {{6975, -59793}, {6976, -59793}}, {{6978, -66609}, {6979, -66609}}, 
     {{6981, -66298}, {6982, -66298}}, {{6984, -66312}, {6985, -66312}}, 
     {{6987, -76647}, {6988, -76647}}, {{6990, -69521}, {6991, -69521}}, 
     {{6993, -72830}, {6994, -72830}}, {{6996, -72572}, {6997, -72572}}, 
     {{6999, -68730}, {7000, -68730}}, {{7002, -72383}, {7003, -72383}}, 
     {{7005, -72552}, {7006, -72552}}, {{7008, -76056}, {7009, -76056}}, 
     {{7011, -76036}, {7012, -76036}}, {{7014, -76145}, {7015, -76145}}, 
     {{7017, -76242}, {7018, -76242}}, {{7020, -79618}, {7021, -79618}}, 
     {{7023, -76033}, {7024, -76033}}, {{7026, -79362}, {7027, -79362}}, 
     {{7029, -83156}, {7030, -83156}}, {{7032, -76434}, {7033, -76434}}, 
     {{7035, -65899}, {7036, -65899}}, {{7038, -62195}, {7039, -62195}}, 
     {{7041, -62198}, {7042, -62198}}, {{7044, -69143}, {7045, -69143}}, 
     {{7047, -68653}, {7048, -68653}}, {{7050, -71991}, {7051, -71991}}, 
     {{7053, -64719}, {7054, -64719}}, {{7056, -64656}, {7057, -64656}}, 
     {{7059, -67926}, {7060, -67926}}, {{7062, -60989}, {7063, -60989}}, 
     {{7065, -57336}, {7066, -57336}}, {{7068, -50134}, {7069, -50134}}, 
     {{7071, -47287}, {7072, -47287}}, {{7074, -43784}, {7075, -43784}}, 
     {{7077, -47185}, {7078, -47185}}, {{7080, -47637}, {7081, -47637}}, 
     {{7083, -40314}, {7084, -40314}}, {{7086, -47593}, {7087, -47593}}, 
     {{7089, -48105}, {7090, -48105}}, {{7092, -47979}, {7093, -47979}}, 
     {{7095, -37376}, {7096, -37376}}, {{7098, -33952}, {7099, -33952}}, 
     {{7101, -30296}, {7102, -30296}}, {{7104, -37725}, {7105, -37725}}, 
     {{7107, -37367}, {7108, -37367}}, {{7110, -40935}, {7111, -40935}}, 
     {{7113, -33965}, {7114, -33965}}, {{7116, -26941}, {7117, -26941}}, 
     {{7119, -19786}, {7120, -19786}}, {{7122, -26886}, {7123, -26886}}, 
     {{7125, -23279}, {7126, -23279}}, {{7128, -30501}, {7129, -30501}}, 
     {{7131, -26979}, {7132, -26979}}, {{7134, -19630}, {7135, -19630}}, 
     {{7137, -16094}, {7138, -16094}}, {{7140, -19525}, {7141, -19525}}, 
     {{7143, -8987}, {7144, -8987}}, {{7146, -5397}, {7147, -5397}}, 
     {{7149, 1741}, {7150, 1741}}, {{7152, -1790}, {7153, -1790}}, 
     {{7155, 1818}, {7156, 1818}}, {{7158, 1680}, {7159, 1680}}, 
     {{7161, 1261}, {7162, 1261}}, {{7164, 1640}, {7165, 1640}}, 
     {{7167, 12511}, {7168, 12511}}, {{7170, 19869}, {7171, 19869}}, 
     {{7173, 23252}, {7174, 23252}}, {{7176, 19683}, {7177, 19683}}, 
     {{7179, 15869}, {7180, 15869}}, {{7182, 19554}, {7183, 19554}}, 
     {{7185, 19430}, {7186, 19430}}, {{7188, 19758}, {7189, 19758}}, 
     {{7191, 12605}, {7192, 12605}}, {{7194, 12583}, {7195, 12583}}, 
     {{7197, 19782}, {7198, 19782}}, {{7200, 19763}, {7201, 19763}}, 
     {{7203, 19844}, {7204, 19844}}, {{7206, 12546}, {7207, 12546}}, 
     {{7209, 8898}, {7210, 8898}}, {{7212, 8804}, {7213, 8804}}, 
     {{7215, 12695}, {7216, 12695}}, {{7218, 16207}, {7219, 16207}}, 
     {{7221, 8899}, {7222, 8899}}, {{7224, 8712}, {7225, 8712}}, 
     {{7227, 12367}, {7228, 12367}}, {{7230, 12426}, {7231, 12426}}, 
     {{7233, 19095}, {7234, 19095}}, {{7236, 26442}, {7237, 26442}}, 
     {{7239, 23114}, {7240, 23114}}, {{7242, 30325}, {7243, 30325}}, 
     {{7245, 26558}, {7246, 26558}}, {{7248, 26638}, {7249, 26638}}, 
     {{7251, 34099}, {7252, 34099}}, {{7254, 30575}, {7255, 30575}}, 
     {{7257, 30669}, {7258, 30669}}, {{7260, 23354}, {7261, 23354}}, 
     {{7263, 30707}, {7264, 30707}}, {{7266, 38289}, {7267, 38289}}, 
     {{7269, 41902}, {7270, 41902}}, {{7272, 41948}, {7273, 41948}}, 
     {{7275, 49351}, {7276, 49351}}, {{7278, 49500}, {7279, 49500}}, 
     {{7281, 53022}, {7282, 53022}}, {{7284, 45788}, {7285, 45788}}, 
     {{7287, 41911}, {7288, 41911}}, {{7290, 45647}, {7291, 45647}}, 
     {{7293, 52850}, {7294, 52850}}, {{7296, 52707}, {7297, 52707}}, 
     {{7299, 45087}, {7300, 45087}}, {{7302, 41304}, {7303, 41304}}, 
     {{7305, 41152}, {7306, 41152}}, {{7308, 33723}, {7309, 33723}}, 
     {{7311, 37556}, {7312, 37556}}, {{7314, 44912}, {7315, 44912}}, 
     {{7317, 48492}, {7318, 48492}}, {{7320, 55671}, {7321, 55671}}, 
     {{7323, 52599}, {7324, 52599}}, {{7326, 52599}, {7327, 52599}}, 
     {{7329, 52210}, {7330, 52210}}, {{7332, 45027}, {7333, 45027}}, 
     {{7335, 37867}, {7336, 37867}}, {{7338, 30451}, {7339, 30451}}, 
     {{7341, 37772}, {7342, 37772}}, {{7344, 45204}, {7345, 45204}}, 
     {{7347, 41464}, {7348, 41464}}, {{7350, 37538}, {7351, 37538}}, 
     {{7353, 34038}, {7354, 34038}}, {{7356, 41292}, {7357, 41292}}, 
     {{7359, 37296}, {7360, 37296}}, {{7362, 40674}, {7363, 40674}}, 
     {{7365, 39706}, {7366, 39706}}, {{7368, 39834}, {7369, 39834}}, 
     {{7371, 39775}, {7372, 39775}}, {{7374, 40292}, {7375, 40292}}, 
     {{7377, 43744}, {7378, 43744}}, {{7380, 51184}, {7381, 51184}}, 
     {{7383, 51275}, {7384, 51275}}, {{7386, 43969}, {7387, 43969}}, 
     {{7389, 47718}, {7390, 47718}}, {{7392, 47424}, {7393, 47424}}, 
     {{7395, 51186}, {7396, 51186}}, {{7398, 54902}, {7399, 54902}}, 
     {{7401, 58369}, {7402, 58369}}, {{7404, 66044}, {7405, 66044}}, 
     {{7407, 69615}, {7408, 69615}}, {{7410, 69622}, {7411, 69622}}, 
     {{7413, 62242}, {7414, 62242}}, {{7416, 62361}, {7417, 62361}}, 
     {{7419, 66527}, {7420, 66527}}, {{7422, 66813}, {7423, 66813}}, 
     {{7425, 70552}, {7426, 70552}}, {{7428, 70940}, {7429, 70940}}, 
     {{7431, 67073}, {7432, 67073}}, {{7434, 63378}, {7435, 63378}}, 
     {{7437, 63453}, {7438, 63453}}, {{7440, 71064}, {7441, 71064}}, 
     {{7443, 74502}, {7444, 74502}}, {{7446, 82099}, {7447, 82099}}, 
     {{7449, 81849}, {7450, 81849}}, {{7452, 78110}, {7453, 78110}}, 
     {{7455, 89294}, {7456, 89294}}, {{7458, 89127}, {7459, 89127}}, 
     {{7461, 85609}, {7462, 85609}}, {{7464, 93035}, {7465, 93035}}, 
     {{7467, 96799}, {7468, 96799}}, {{7470, 92936}, {7471, 92936}}, 
     {{7473, 92679}, {7474, 92679}}, {{7476, 88656}, {7477, 88656}}, 
     {{7479, 88781}, {7480, 88781}}, {{7482, 88757}, {7483, 88757}}, 
     {{7485, 88787}, {7486, 88787}}, {{7488, 81395}, {7489, 81395}}, 
     {{7491, 77534}, {7492, 77534}}, {{7494, 77654}, {7495, 77654}}, 
     {{7497, 81415}, {7498, 81415}}, {{7500, 73616}, {7501, 73616}}, 
     {{7503, 73790}, {7504, 73790}}, {{7506, 70082}, {7507, 70082}}, 
     {{7509, 69295}, {7510, 69295}}, {{7512, 61377}, {7513, 61377}}, 
     {{7515, 65229}, {7516, 65229}}, {{7518, 64841}, {7519, 64841}}, 
     {{7521, 65007}, {7522, 65007}}, {{7524, 65392}, {7525, 65392}}, 
     {{7527, 57924}, {7528, 57924}}, {{7530, 57548}, {7531, 57548}}, 
     {{7533, 61279}, {7534, 61279}}, {{7536, 61069}, {7537, 61069}}, 
     {{7539, 56994}, {7540, 56994}}, {{7542, 53296}, {7543, 53296}}, 
     {{7545, 53346}, {7546, 53346}}, {{7548, 49613}, {7549, 49613}}, 
     {{7551, 45974}, {7552, 45974}}, {{7554, 38304}, {7555, 38304}}, 
     {{7557, 38366}, {7558, 38366}}, {{7560, 37607}, {7561, 37607}}, 
     {{7563, 33909}, {7564, 33909}}, {{7566, 33878}, {7567, 33878}}, 
     {{7569, 30170}, {7570, 30170}}, {{7572, 29940}, {7573, 29940}}, 
     {{7575, 22074}, {7576, 22074}}, {{7578, 18111}, {7579, 18111}}, 
     {{7581, 14507}, {7582, 14507}}, {{7584, 6874}, {7585, 6874}}, 
     {{7587, 6504}, {7588, 6504}}, {{7590, -1054}, {7591, -1054}}, 
     {{7593, -1370}, {7594, -1370}}, {{7596, 2684}, {7597, 2684}}, 
     {{7599, -930}, {7600, -930}}, {{7602, 6621}, {7603, 6621}}, 
     {{7605, 2826}, {7606, 2826}}, {{7608, 2574}, {7609, 2574}}, 
     {{7611, -1211}, {7612, -1211}}, {{7614, 2417}, {7615, 2417}}, 
     {{7617, 10436}, {7618, 10436}}, {{7620, 9940}, {7621, 9940}}, 
     {{7623, 2226}, {7624, 2226}}, {{7626, 5750}, {7627, 5750}}, 
     {{7629, 13486}, {7630, 13486}}, {{7632, 21169}, {7633, 21169}}, 
     {{7635, 17230}, {7636, 17230}}, {{7638, 24996}, {7639, 24996}}, 
     {{7641, 21265}, {7642, 21265}}, {{7644, 21081}, {7645, 21081}}, 
     {{7647, 25137}, {7648, 25137}}, {{7650, 21014}, {7651, 21014}}, 
     {{7653, 28604}, {7654, 28604}}, {{7656, 28627}, {7657, 28627}}, 
     {{7659, 21078}, {7660, 21078}}, {{7662, 20962}, {7663, 20962}}, 
     {{7665, 28726}, {7666, 28726}}, {{7668, 28948}, {7669, 28948}}, 
     {{7671, 32555}, {7672, 32555}}, {{7674, 24670}, {7675, 24670}}, 
     {{7677, 24670}, {7678, 24670}}, {{7680, 24420}, {7681, 24420}}, 
     {{7683, 12868}, {7684, 12868}}, {{7686, 9252}, {7687, 9252}}, 
     {{7689, 1730}, {7690, 1730}}, {{7692, -5979}, {7693, -5979}}, 
     {{7695, -2034}, {7696, -2034}}, {{7698, -2037}, {7699, -2037}}, 
     {{7701, -9643}, {7702, -9643}}, {{7704, -9410}, {7705, -9410}}, 
     {{7707, -13166}, {7708, -13166}}, {{7710, -5270}, {7711, -5270}}, 
     {{7713, -1570}, {7714, -1570}}, {{7716, 6045}, {7717, 6045}}, 
     {{7719, -5820}, {7720, -5820}}, {{7722, -1897}, {7723, -1897}}, 
     {{7725, -5548}, {7726, -5548}}, {{7728, -5405}, {7729, -5405}}, 
     {{7731, -5160}, {7732, -5160}}, {{7734, -12771}, {7735, -12771}}, 
     {{7737, -5243}, {7738, -5243}}, {{7740, -5608}, {7741, -5608}}, 
     {{7743, -13465}, {7744, -13465}}, {{7746, -13366}, {7747, -13366}}, 
     {{7749, -9372}, {7750, -9372}}, {{7752, -5427}, {7753, -5427}}, 
     {{7755, -1872}, {7756, -1872}}, {{7758, -5637}, {7759, -5637}}, 
     {{7761, -13745}, {7762, -13745}}, {{7764, -6070}, {7765, -6070}}, 
     {{7767, -6571}, {7768, -6571}}, {{7770, -6430}, {7771, -6430}}, 
     {{7773, 1382}, {7774, 1382}}, {{7776, 1382}, {7777, 1382}}, 
     {{7779, 5254}, {7780, 5254}}, {{7782, 5276}, {7783, 5276}}, 
     {{7785, 9384}, {7786, 9384}}, {{7788, 9296}, {7789, 9296}}, 
     {{7791, 9295}, {7792, 9295}}, {{7794, 5435}, {7795, 5435}}, 
     {{7797, 5228}, {7798, 5228}}, {{7800, 5360}, {7801, 5360}}, 
     {{7803, 5143}, {7804, 5143}}, {{7806, -2724}, {7807, -2724}}, 
     {{7809, -2813}, {7810, -2813}}, {{7812, 5064}, {7813, 5064}}, 
     {{7815, 9369}, {7816, 9369}}, {{7818, 1525}, {7819, 1525}}, 
     {{7821, 5561}, {7822, 5561}}, {{7824, 5348}, {7825, 5348}}, 
     {{7827, 13128}, {7828, 13128}}, {{7830, 8919}, {7831, 8919}}, 
     {{7833, 9252}, {7834, 9252}}, {{7836, 16908}, {7837, 16908}}, 
     {{7839, 24633}, {7840, 24633}}, {{7842, 16742}, {7843, 16742}}, 
     {{7845, 9342}, {7846, 9342}}, {{7848, 8872}, {7849, 8872}}, 
     {{7851, 16493}, {7852, 16493}}, {{7854, 8771}, {7855, 8771}}, 
     {{7857, 12614}, {7858, 12614}}, {{7860, 20404}, {7861, 20404}}, 
     {{7863, 32266}, {7864, 32266}}, {{7866, 32266}, {7867, 32266}}, 
     {{7869, 24043}, {7870, 24043}}, {{7872, 23876}, {7873, 23876}}, 
     {{7875, 16017}, {7876, 16017}}, {{7878, 16054}, {7879, 16054}}, 
     {{7881, 7716}, {7882, 7716}}, {{7884, -138}, {7885, -138}}, 
     {{7887, -4773}, {7888, -4773}}, {{7890, -955}, {7891, -955}}, 
     {{7893, 2932}, {7894, 2932}}, {{7896, 10864}, {7897, 10864}}, 
     {{7899, 15334}, {7900, 15334}}, {{7902, 11223}, {7903, 11223}}, 
     {{7905, 19198}, {7906, 19198}}, {{7908, 11116}, {7909, 11116}}, 
     {{7911, 19411}, {7912, 19411}}, {{7914, 19348}, {7915, 19348}}, 
     {{7917, 26680}, {7918, 26680}}, {{7920, 18620}, {7921, 18620}}, 
     {{7923, 10580}, {7924, 10580}}, {{7926, 6568}, {7927, 6568}}, 
     {{7929, 2681}, {7930, 2681}}, {{7932, 2459}, {7933, 2459}}, 
     {{7935, 2518}, {7936, 2518}}, {{7938, -1356}, {7939, -1356}}, 
     {{7941, 6788}, {7942, 6788}}, {{7944, 6788}, {7945, 6788}}, 
     {{7947, -1271}, {7948, -1271}}, {{7950, -5362}, {7951, -5362}}, 
     {{7953, -13384}, {7954, -13384}}, {{7956, -21150}, {7957, -21150}}, 
     {{7959, -25212}, {7960, -25212}}, {{7962, -25546}, {7963, -25546}}, 
     {{7965, -29885}, {7966, -29885}}, {{7968, -30146}, {7969, -30146}}, 
     {{7971, -25816}, {7972, -25816}}, {{7974, -29852}, {7975, -29852}}, 
     {{7977, -25745}, {7978, -25745}}, {{7980, -17683}, {7981, -17683}}, 
     {{7983, -18057}, {7984, -18057}}, {{7986, -13950}, {7987, -13950}}, 
     {{7989, -9939}, {7990, -9939}}, {{7992, -1956}, {7993, -1956}}, 
     {{7995, -6000}, {7996, -6000}}, {{7998, 2003}, {7999, 2003}}, 
     {{8001, 6145}, {8002, 6145}}, {{8004, 14090}, {8005, 14090}}, 
     {{8007, 18034}, {8008, 18034}}, {{8010, 14164}, {8011, 14164}}, 
     {{8013, 13837}, {8014, 13837}}, {{8016, 13698}, {8017, 13698}}, 
     {{8019, 5492}, {8020, 5492}}, {{8022, 13799}, {8023, 13799}}, 
     {{8025, 17687}, {8026, 17687}}, {{8028, 25672}, {8029, 25672}}, 
     {{8031, 29988}, {8032, 29988}}, {{8034, 38218}, {8035, 38218}}, 
     {{8037, 42241}, {8038, 42241}}, {{8040, 42217}, {8041, 42217}}, 
     {{8043, 38398}, {8044, 38398}}, {{8046, 42337}, {8047, 42337}}, 
     {{8049, 50551}, {8050, 50551}}, {{8052, 54392}, {8053, 54392}}, 
     {{8055, 54208}, {8056, 54208}}, {{8058, 62140}, {8059, 62140}}, 
     {{8061, 62320}, {8062, 62320}}, {{8064, 62397}, {8065, 62397}}, 
     {{8067, 66354}, {8068, 66354}}, {{8070, 66496}, {8071, 66496}}, 
     {{8073, 70418}, {8074, 70418}}, {{8076, 66344}, {8077, 66344}}, 
     {{8079, 70681}, {8080, 70681}}, {{8082, 66972}, {8083, 66972}}, 
     {{8085, 71228}, {8086, 71228}}, {{8088, 63066}, {8089, 63066}}, 
     {{8091, 54974}, {8092, 54974}}, {{8094, 54823}, {8095, 54823}}, 
     {{8097, 62777}, {8098, 62777}}, {{8100, 62285}, {8101, 62285}}, 
     {{8103, 58132}, {8104, 58132}}, {{8106, 66455}, {8107, 66455}}, 
     {{8109, 66455}, {8110, 66455}}, {{8112, 58291}, {8113, 58291}}, 
     {{8115, 54518}, {8116, 54518}}, {{8118, 50226}, {8119, 50226}}, 
     {{8121, 58789}, {8122, 58789}}, {{8124, 51072}, {8125, 51072}}, 
     {{8127, 47191}, {8128, 47191}}, {{8130, 55241}, {8131, 55241}}, 
     {{8133, 63641}, {8134, 63641}}, {{8136, 67612}, {8137, 67612}}, 
     {{8139, 72037}, {8140, 72037}}, {{8142, 80197}, {8143, 80197}}, 
     {{8145, 84321}, {8146, 84321}}, {{8148, 84338}, {8149, 84338}}, 
     {{8151, 92495}, {8152, 92495}}, {{8154, 96675}, {8155, 96675}}, 
     {{8157, 96795}, {8158, 96795}}, {{8160, 104956}, {8161, 104956}}, 
     {{8163, 104929}, {8164, 104929}}, {{8166, 96774}, {8167, 96774}}, 
     {{8169, 88641}, {8170, 88641}}, {{8172, 88639}, {8173, 88639}}, 
     {{8175, 88584}, {8176, 88584}}, {{8178, 88404}, {8179, 88404}}, 
     {{8181, 84431}, {8182, 84431}}, {{8184, 88547}, {8185, 88547}}, 
     {{8187, 100635}, {8188, 100635}}, {{8190, 105052}, {8191, 105052}}, 
     {{8193, 104914}, {8194, 104914}}, {{8196, 96732}, {8197, 96732}}, 
     {{8199, 105170}, {8200, 105170}}, {{8202, 105749}, {8203, 105749}}, 
     {{8205, 105481}, {8206, 105481}}, {{8208, 105439}, {8209, 105439}}, 
     {{8211, 102049}, {8212, 102049}}, {{8214, 106237}, {8215, 106237}}, 
     {{8217, 102066}, {8218, 102066}}, {{8220, 93533}, {8221, 93533}}, 
     {{8223, 97507}, {8224, 97507}}, {{8226, 97507}, {8227, 97507}}, 
     {{8229, 97567}, {8230, 97567}}, {{8232, 89296}, {8233, 89296}}, 
     {{8235, 80643}, {8236, 80643}}, {{8238, 72644}, {8239, 72644}}, 
     {{8241, 64797}, {8242, 64797}}, {{8244, 56458}, {8245, 56458}}, 
     {{8247, 61025}, {8248, 61025}}, {{8250, 65264}, {8251, 65264}}, 
     {{8253, 69117}, {8254, 69117}}, {{8256, 68298}, {8257, 68298}}, 
     {{8259, 80607}, {8260, 80607}}, {{8262, 84517}, {8263, 84517}}, 
     {{8265, 84232}, {8266, 84232}}, {{8268, 92667}, {8269, 92667}}, 
     {{8271, 84281}, {8272, 84281}}, {{8274, 84008}, {8275, 84008}}, 
     {{8277, 80038}, {8278, 80038}}, {{8280, 88505}, {8281, 88505}}, 
     {{8283, 80236}, {8284, 80236}}, {{8286, 80675}, {8287, 80675}}, 
     {{8289, 76383}, {8290, 76383}}, {{8292, 68189}, {8293, 68189}}, 
     {{8295, 72220}, {8296, 72220}}, {{8298, 67976}, {8299, 67976}}, 
     {{8301, 76343}, {8302, 76343}}, {{8304, 72257}, {8305, 72257}}, 
     {{8307, 72637}, {8308, 72637}}, {{8310, 80794}, {8311, 80794}}, 
     {{8313, 72495}, {8314, 72495}}, {{8316, 80898}, {8317, 80898}}, 
     {{8319, 77338}, {8320, 77338}}, {{8322, 85629}, {8323, 85629}}, 
     {{8325, 81173}, {8326, 81173}}, {{8328, 80423}, {8329, 80423}}, 
     {{8331, 80057}, {8332, 80057}}, {{8334, 83857}, {8335, 83857}}, 
     {{8337, 84181}, {8338, 84181}}, {{8340, 84320}, {8341, 84320}}, 
     {{8343, 84097}, {8344, 84097}}, {{8346, 92507}, {8347, 92507}}, 
     {{8349, 96637}, {8350, 96637}}, {{8352, 100955}, {8353, 100955}}, 
     {{8355, 96986}, {8356, 96986}}, {{8358, 105544}, {8359, 105544}}, 
     {{8361, 109313}, {8362, 109313}}, {{8364, 101205}, {8365, 101205}}, 
     {{8367, 97551}, {8368, 97551}}, {{8370, 93487}, {8371, 93487}}, 
     {{8373, 101578}, {8374, 101578}}, {{8376, 97573}, {8377, 97573}}, 
     {{8379, 89231}, {8380, 89231}}, {{8382, 93630}, {8383, 93630}}, 
     {{8385, 102217}, {8386, 102217}}, {{8388, 93761}, {8389, 93761}}, 
     {{8391, 88841}, {8392, 88841}}, {{8394, 80446}, {8395, 80446}}, 
     {{8397, 76239}, {8398, 76239}}, {{8400, 84599}, {8401, 84599}}, 
     {{8403, 97325}, {8404, 97325}}, {{8406, 97325}, {8407, 97325}}, 
     {{8409, 105769}, {8410, 105769}}, {{8412, 109948}, {8413, 109948}}, 
     {{8415, 110445}, {8416, 110445}}, {{8418, 118597}, {8419, 118597}}, 
     {{8421, 110018}, {8422, 110018}}, {{8424, 110387}, {8425, 110387}}, 
     {{8427, 106385}, {8428, 106385}}, {{8430, 106362}, {8431, 106362}}, 
     {{8433, 102294}, {8434, 102294}}, {{8436, 101969}, {8437, 101969}}, 
     {{8439, 97982}, {8440, 97982}}, {{8442, 102153}, {8443, 102153}}, 
     {{8445, 93689}, {8446, 93689}}, {{8448, 85159}, {8449, 85159}}, 
     {{8451, 80894}, {8452, 80894}}, {{8454, 81261}, {8455, 81261}}, 
     {{8457, 81471}, {8458, 81471}}, {{8460, 89715}, {8461, 89715}}, 
     {{8463, 94195}, {8464, 94195}}, {{8466, 102572}, {8467, 102572}}, 
     {{8469, 98106}, {8470, 98106}}, {{8472, 102672}, {8473, 102672}}, 
     {{8475, 102351}, {8476, 102351}}, {{8478, 102351}, {8479, 102351}}, 
     {{8481, 102630}, {8482, 102630}}, {{8484, 111098}, {8485, 111098}}, 
     {{8487, 119592}, {8488, 119592}}, {{8490, 128045}, {8491, 128045}}, 
     {{8493, 128049}, {8494, 128049}}, {{8496, 128096}, {8497, 128096}}, 
     {{8499, 132710}, {8500, 132710}}, {{8502, 133029}, {8503, 133029}}, 
     {{8505, 137422}, {8506, 137422}}, {{8508, 146105}, {8509, 146105}}, 
     {{8511, 159041}, {8512, 159041}}, {{8514, 154567}, {8515, 154567}}, 
     {{8517, 146532}, {8518, 146532}}, {{8520, 155272}, {8521, 155272}}, 
     {{8523, 155637}, {8524, 155637}}, {{8526, 155637}, {8527, 155637}}, 
     {{8529, 155230}, {8530, 155230}}, {{8532, 155510}, {8533, 155510}}, 
     {{8535, 142514}, {8536, 142514}}, {{8538, 134044}, {8539, 134044}}, 
     {{8541, 129688}, {8542, 129688}}, {{8544, 129698}, {8545, 129698}}, 
     {{8547, 142458}, {8548, 142458}}, {{8550, 146800}, {8551, 146800}}, 
     {{8553, 155359}, {8554, 155359}}, {{8556, 155845}, {8557, 155845}}, 
     {{8559, 155914}, {8560, 155914}}, {{8562, 156027}, {8563, 156027}}, 
     {{8565, 147445}, {8566, 147445}}, {{8568, 155800}, {8569, 155800}}, 
     {{8571, 151959}, {8572, 151959}}, {{8574, 143495}, {8575, 143495}}, 
     {{8577, 143495}, {8578, 143495}}, {{8580, 151894}, {8581, 151894}}, 
     {{8583, 147300}, {8584, 147300}}, {{8586, 142818}, {8587, 142818}}, 
     {{8589, 142475}, {8590, 142475}}, {{8592, 138310}, {8593, 138310}}, 
     {{8595, 146726}, {8596, 146726}}, {{8598, 137896}, {8599, 137896}}, 
     {{8601, 129095}, {8602, 129095}}, {{8604, 137212}, {8605, 137212}}, 
     {{8607, 133399}, {8608, 133399}}, {{8610, 125001}, {8611, 125001}}, 
     {{8613, 129365}, {8614, 129365}}, {{8616, 128911}, {8617, 128911}}, 
     {{8619, 129237}, {8620, 129237}}, {{8622, 133704}, {8623, 133704}}, 
     {{8625, 129249}, {8626, 129249}}, {{8628, 120584}, {8629, 120584}}, 
     {{8631, 111845}, {8632, 111845}}, {{8634, 111476}, {8635, 111476}}, 
     {{8637, 111620}, {8638, 111620}}, {{8640, 111313}, {8641, 111313}}, 
     {{8643, 98145}, {8644, 98145}}, {{8646, 106743}, {8647, 106743}}, 
     {{8649, 102361}, {8650, 102361}}, {{8652, 106848}, {8653, 106848}}, 
     {{8655, 111637}, {8656, 111637}}, {{8658, 115951}, {8659, 115951}}, 
     {{8661, 124753}, {8662, 124753}}, {{8664, 116339}, {8665, 116339}}, 
     {{8667, 116096}, {8668, 116096}}, {{8670, 111801}, {8671, 111801}}, 
     {{8673, 107216}, {8674, 107216}}, {{8676, 111667}, {8677, 111667}}, 
     {{8679, 107248}, {8680, 107248}}, {{8682, 98631}, {8683, 98631}}, 
     {{8685, 103077}, {8686, 103077}}, {{8688, 94385}, {8689, 94385}}, 
     {{8691, 98666}, {8692, 98666}}, {{8694, 93934}, {8695, 93934}}, 
     {{8697, 85627}, {8698, 85627}}, {{8700, 85734}, {8701, 85734}}, 
     {{8703, 76961}, {8704, 76961}}, {{8706, 77329}, {8707, 77329}}, 
     {{8709, 77573}, {8710, 77573}}, {{8712, 86214}, {8713, 86214}}, 
     {{8715, 90109}, {8716, 90109}}, {{8718, 89795}, {8719, 89795}}, 
     {{8721, 85138}, {8722, 85138}}, {{8724, 80623}, {8725, 80623}}, 
     {{8727, 89306}, {8728, 89306}}, {{8730, 84503}, {8731, 84503}}, 
     {{8733, 75953}, {8734, 75953}}, {{8736, 75966}, {8737, 75966}}, 
     {{8739, 67421}, {8740, 67421}}, {{8742, 67800}, {8743, 67800}}, 
     {{8745, 77014}, {8746, 77014}}, {{8748, 77508}, {8749, 77508}}, 
     {{8751, 86751}, {8752, 86751}}, {{8754, 78044}, {8755, 78044}}, 
     {{8757, 73737}, {8758, 73737}}, {{8760, 73462}, {8761, 73462}}, 
     {{8763, 60484}, {8764, 60484}}, {{8766, 64992}, {8767, 64992}}, 
     {{8769, 64796}, {8770, 64796}}, {{8772, 60566}, {8773, 60566}}, 
     {{8775, 60258}, {8776, 60258}}, {{8778, 60185}, {8779, 60185}}, 
     {{8781, 60593}, {8782, 60593}}, {{8784, 60510}, {8785, 60510}}, 
     {{8787, 47640}, {8788, 47640}}, {{8790, 47822}, {8791, 47822}}, 
     {{8793, 52328}, {8794, 52328}}, {{8796, 61059}, {8797, 61059}}, 
     {{8799, 56236}, {8800, 56236}}, {{8802, 60653}, {8803, 60653}}, 
     {{8805, 51736}, {8806, 51736}}, {{8808, 51920}, {8809, 51920}}, 
     {{8811, 51818}, {8812, 51818}}, {{8814, 60644}, {8815, 60644}}, 
     {{8817, 60800}, {8818, 60800}}, {{8820, 60460}, {8821, 60460}}, 
     {{8823, 46992}, {8824, 46992}}, {{8826, 42458}, {8827, 42458}}, 
     {{8829, 37982}, {8830, 37982}}, {{8832, 29316}, {8833, 29316}}, 
     {{8835, 29704}, {8836, 29704}}, {{8838, 25426}, {8839, 25426}}, 
     {{8841, 16319}, {8842, 16319}}, {{8844, 25378}, {8845, 25378}}, 
     {{8847, 25069}, {8848, 25069}}, {{8850, 20662}, {8851, 20662}}, 
     {{8853, 20779}, {8854, 20779}}, {{8856, 20699}, {8857, 20699}}, 
     {{8859, 25321}, {8860, 25321}}, {{8862, 25209}, {8863, 25209}}, 
     {{8865, 20869}, {8866, 20869}}, {{8868, 20815}, {8869, 20815}}, 
     {{8871, 21192}, {8872, 21192}}, {{8874, 25651}, {8875, 25651}}, 
     {{8877, 20841}, {8878, 20841}}, {{8880, 21206}, {8881, 21206}}, 
     {{8883, 29734}, {8884, 29734}}, {{8886, 30215}, {8887, 30215}}, 
     {{8889, 30184}, {8890, 30184}}, {{8892, 38946}, {8893, 38946}}, 
     {{8895, 34319}, {8896, 34319}}, {{8898, 25412}, {8899, 25412}}, 
     {{8901, 29896}, {8902, 29896}}, {{8904, 38885}, {8905, 38885}}, 
     {{8907, 34501}, {8908, 34501}}, {{8910, 39027}, {8911, 39027}}, 
     {{8913, 39237}, {8914, 39237}}, {{8916, 48193}, {8917, 48193}}, 
     {{8919, 52379}, {8920, 52379}}, {{8922, 51986}, {8923, 51986}}, 
     {{8925, 47595}, {8926, 47595}}, {{8928, 56659}, {8929, 56659}}, 
     {{8931, 52412}, {8932, 52412}}, {{8934, 43293}, {8935, 43293}}, 
     {{8937, 47803}, {8938, 47803}}, {{8940, 47693}, {8941, 47693}}, 
     {{8943, 34253}, {8944, 34253}}, {{8946, 38832}, {8947, 38832}}, 
     {{8949, 38589}, {8950, 38589}}, {{8952, 33969}, {8953, 33969}}, 
     {{8955, 38298}, {8956, 38298}}, {{8958, 33780}, {8959, 33780}}, 
     {{8961, 29206}, {8962, 29206}}, {{8964, 29689}, {8965, 29689}}, 
     {{8967, 29686}, {8968, 29686}}, {{8970, 20388}, {8971, 20388}}, 
     {{8973, 15951}, {8974, 15951}}, {{8976, 11274}, {8977, 11274}}, 
     {{8979, 11144}, {8980, 11144}}, {{8982, 15780}, {8983, 15780}}, 
     {{8985, 15307}, {8986, 15307}}, {{8988, 15131}, {8989, 15131}}, 
     {{8991, 24230}, {8992, 24230}}, {{8994, 19507}, {8995, 19507}}, 
     {{8997, 19867}, {8998, 19867}}, {{9000, 11251}, {9001, 11251}}, 
     {{9003, 7195}, {9004, 7195}}, {{9006, 16257}, {9007, 16257}}, 
     {{9009, 11801}, {9010, 11801}}, {{9012, 12228}, {9013, 12228}}, 
     {{9015, 7205}, {9016, 7205}}, {{9018, 11612}, {9019, 11612}}, 
     {{9021, 11437}, {9022, 11437}}, {{9024, 11697}, {9025, 11697}}, 
     {{9027, 16136}, {9028, 16136}}, {{9030, 7445}, {9031, 7445}}, 
     {{9033, 16733}, {9034, 16733}}, {{9036, 16997}, {9037, 16997}}, 
     {{9039, 21464}, {9040, 21464}}, {{9042, 21684}, {9043, 21684}}, 
     {{9045, 16852}, {9046, 16852}}, {{9048, 25872}, {9049, 25872}}, 
     {{9051, 16415}, {9052, 16415}}, {{9054, 20666}, {9055, 20666}}, 
     {{9057, 29409}, {9058, 29409}}, {{9060, 19977}, {9061, 19977}}, 
     {{9063, 10781}, {9064, 10781}}, {{9066, 5962}, {9067, 5962}}, 
     {{9069, 6635}, {9070, 6635}}, {{9072, 6862}, {9073, 6862}}, 
     {{9075, 7172}, {9076, 7172}}, {{9078, 16298}, {9079, 16298}}, 
     {{9081, 20725}, {9082, 20725}}, {{9084, 20882}, {9085, 20882}}, 
     {{9087, 16346}, {9088, 16346}}, {{9090, 20946}, {9091, 20946}}, 
     {{9093, 11460}, {9094, 11460}}, {{9096, 11377}, {9097, 11377}}, 
     {{9099, 20655}, {9100, 20655}}, {{9102, 29837}, {9103, 29837}}, 
     {{9105, 20876}, {9106, 20876}}, {{9108, 21430}, {9109, 21430}}, 
     {{9111, 17093}, {9112, 17093}}, {{9114, 21472}, {9115, 21472}}, 
     {{9117, 25992}, {9118, 25992}}, {{9120, 25926}, {9121, 25926}}, 
     {{9123, 39656}, {9124, 39656}}, {{9126, 39656}, {9127, 39656}}, 
     {{9129, 30327}, {9130, 30327}}, {{9132, 39204}, {9133, 39204}}, 
     {{9135, 38979}, {9136, 38979}}, {{9138, 29825}, {9139, 29825}}, 
     {{9141, 20691}, {9142, 20691}}, {{9144, 20962}, {9145, 20962}}, 
     {{9147, 16590}, {9148, 16590}}, {{9150, 21253}, {9151, 21253}}, 
     {{9153, 16771}, {9154, 16771}}, {{9156, 16269}, {9157, 16269}}, 
     {{9159, 2713}, {9160, 2713}}, {{9162, -1922}, {9163, -1922}}, 
     {{9165, 2662}, {9166, 2662}}, {{9168, 11981}, {9169, 11981}}, 
     {{9171, 21132}, {9172, 21132}}, {{9174, 21358}, {9175, 21358}}, 
     {{9177, 26113}, {9178, 26113}}, {{9180, 26142}, {9181, 26142}}, 
     {{9183, 30536}, {9184, 30536}}, {{9186, 21151}, {9187, 21151}}, 
     {{9189, 16608}, {9190, 16608}}, {{9192, 7493}, {9193, 7493}}, 
     {{9195, 12004}, {9196, 12004}}, {{9198, 16837}, {9199, 16837}}, 
     {{9201, 16865}, {9202, 16865}}, {{9204, 7623}, {9205, 7623}}, 
     {{9207, 8186}, {9208, 8186}}, {{9210, 8272}, {9211, 8272}}, 
     {{9213, 8142}, {9214, 8142}}, {{9216, -1042}, {9217, -1042}}, 
     {{9219, -5585}, {9220, -5585}}, {{9222, -5700}, {9223, -5700}}, 
     {{9225, -938}, {9226, -938}}, {{9228, -10086}, {9229, -10086}}, 
     {{9231, -5447}, {9232, -5447}}, {{9234, -867}, {9235, -867}}, 
     {{9237, 8163}, {9238, 8163}}, {{9240, -1133}, {9241, -1133}}, 
     {{9243, -1385}, {9244, -1385}}, {{9246, 3214}, {9247, 3214}}, 
     {{9249, 12755}, {9250, 12755}}, {{9252, 12755}, {9253, 12755}}, 
     {{9255, 8193}, {9256, 8193}}, {{9258, -991}, {9259, -991}}, 
     {{9261, 3686}, {9262, 3686}}, {{9264, 3907}, {9265, 3907}}, 
     {{9267, -533}, {9268, -533}}, {{9270, -5227}, {9271, -5227}}, 
     {{9273, -5416}, {9274, -5416}}, {{9276, -896}, {9277, -896}}, 
     {{9279, -439}, {9280, -439}}, {{9282, -9994}, {9283, -9994}}, 
     {{9285, -19222}, {9286, -19222}}, {{9288, -10002}, {9289, -10002}}, 
     {{9291, -14878}, {9292, -14878}}, {{9294, -24204}, {9295, -24204}}, 
     {{9297, -24204}, {9298, -24204}}, {{9300, -15050}, {9301, -15050}}, 
     {{9303, -10816}, {9304, -10816}}, {{9306, -6301}, {9307, -6301}}, 
     {{9309, -5960}, {9310, -5960}}, {{9312, -11005}, {9313, -11005}}, 
     {{9315, -1384}, {9316, -1384}}, {{9318, -6082}, {9319, -6082}}, 
     {{9321, -15325}, {9322, -15325}}, {{9324, -24821}, {9325, -24821}}, 
     {{9327, -15460}, {9328, -15460}}, {{9330, -5735}, {9331, -5735}}, 
     {{9333, -10226}, {9334, -10226}}, {{9336, -10209}, {9337, -10209}}, 
     {{9339, -14932}, {9340, -14932}}, {{9342, -19796}, {9343, -19796}}, 
     {{9345, -19739}, {9346, -19739}}, {{9348, -10301}, {9349, -10301}}, 
     {{9351, -15218}, {9352, -15218}}, {{9354, -14730}, {9355, -14730}}, 
     {{9357, -5415}, {9358, -5415}}, {{9360, -855}, {9361, -855}}, 
     {{9363, -5336}, {9364, -5336}}, {{9366, 3945}, {9367, 3945}}, 
     {{9369, -770}, {9370, -770}}, {{9372, -9826}, {9373, -9826}}, 
     {{9375, -19378}, {9376, -19378}}, {{9378, -24136}, {9379, -24136}}, 
     {{9381, -24276}, {9382, -24276}}, {{9384, -14861}, {9385, -14861}}, 
     {{9387, -10271}, {9388, -10271}}, {{9390, -927}, {9391, -927}}, 
     {{9393, -10359}, {9394, -10359}}, {{9396, -1139}, {9397, -1139}}, 
     {{9399, -15028}, {9400, -15028}}, {{9402, -24171}, {9403, -24171}}, 
     {{9405, -28968}, {9406, -28968}}, {{9408, -19547}, {9409, -19547}}, 
     {{9411, -18714}, {9412, -18714}}, {{9414, -23259}, {9415, -23259}}, 
     {{9417, -32949}, {9418, -32949}}, {{9420, -42501}, {9421, -42501}}, 
     {{9423, -52148}, {9424, -52148}}, {{9426, -56941}, {9427, -56941}}, 
     {{9429, -57304}, {9430, -57304}}, {{9432, -56999}, {9433, -56999}}, 
     {{9435, -61521}, {9436, -61521}}, {{9438, -66022}, {9439, -66022}}, 
     {{9441, -70780}, {9442, -70780}}, {{9444, -71059}, {9445, -71059}}, 
     {{9447, -67037}, {9448, -67037}}, {{9450, -62452}, {9451, -62452}}, 
     {{9453, -63121}, {9454, -63121}}, {{9456, -72232}, {9457, -72232}}, 
     {{9459, -67378}, {9460, -67378}}, {{9462, -67015}, {9463, -67015}}, 
     {{9465, -76359}, {9466, -76359}}, {{9468, -76228}, {9469, -76228}}, 
     {{9471, -71688}, {9472, -71688}}, {{9474, -81536}, {9475, -81536}}, 
     {{9477, -81536}, {9478, -81536}}, {{9480, -91131}, {9481, -91131}}, 
     {{9483, -95978}, {9484, -95978}}, {{9486, -100780}, {9487, -100780}}, 
     {{9489, -91375}, {9490, -91375}}, {{9492, -91073}, {9493, -91073}}, 
     {{9495, -90667}, {9496, -90667}}, {{9498, -100264}, {9499, -100264}}, 
     {{9501, -100042}, {9502, -100042}}, {{9504, -99816}, {9505, -99816}}, 
     {{9507, -90446}, {9508, -90446}}, {{9510, -81005}, {9511, -81005}}, 
     {{9513, -85756}, {9514, -85756}}, {{9516, -95247}, {9517, -95247}}, 
     {{9519, -90623}, {9520, -90623}}, {{9522, -95624}, {9523, -95624}}, 
     {{9525, -91057}, {9526, -91057}}, {{9528, -90960}, {9529, -90960}}, 
     {{9531, -90881}, {9532, -90881}}, {{9534, -90891}, {9535, -90891}}, 
     {{9537, -86007}, {9538, -86007}}, {{9540, -95591}, {9541, -95591}}, 
     {{9543, -100265}, {9544, -100265}}, {{9546, -100399}, {9547, -100399}}, 
     {{9549, -105055}, {9550, -105055}}, {{9552, -109988}, {9553, -109988}}, 
     {{9555, -110127}, {9556, -110127}}, {{9558, -105291}, {9559, -105291}}, 
     {{9561, -100470}, {9562, -100470}}, {{9564, -100772}, {9565, -100772}}, 
     {{9567, -91297}, {9568, -91297}}, {{9570, -91040}, {9571, -91040}}, 
     {{9573, -81783}, {9574, -81783}}, {{9576, -77167}, {9577, -77167}}, 
     {{9579, -71938}, {9580, -71938}}, {{9582, -81529}, {9583, -81529}}, 
     {{9585, -81529}, {9586, -81529}}, {{9588, -81318}, {9589, -81318}}, 
     {{9591, -76898}, {9592, -76898}}, {{9594, -72458}, {9595, -72458}}, 
     {{9597, -81961}, {9598, -81961}}, {{9600, -72130}, {9601, -72130}}, 
     {{9603, -71531}, {9604, -71531}}, {{9606, -81486}, {9607, -81486}}, 
     {{9609, -71914}, {9610, -71914}}, {{9612, -67070}, {9613, -67070}}, 
     {{9615, -71850}, {9616, -71850}}, {{9618, -62162}, {9619, -62162}}, 
     {{9621, -66988}, {9622, -66988}}, {{9624, -76635}, {9625, -76635}}, 
     {{9627, -67033}, {9628, -67033}}, {{9630, -71647}, {9631, -71647}}, 
     {{9633, -76495}, {9634, -76495}}, {{9636, -76682}, {9637, -76682}}, 
     {{9639, -76919}, {9640, -76919}}, {{9642, -76712}, {9643, -76712}}, 
     {{9645, -86237}, {9646, -86237}}, {{9648, -76616}, {9649, -76616}}, 
     {{9651, -76217}, {9652, -76217}}, {{9654, -81189}, {9655, -81189}}, 
     {{9657, -76151}, {9658, -76151}}, {{9660, -76254}, {9661, -76254}}, 
     {{9663, -71316}, {9664, -71316}}, {{9666, -66625}, {9667, -66625}}, 
     {{9669, -66860}, {9670, -66860}}, {{9672, -66611}, {9673, -66611}}, 
     {{9675, -66391}, {9676, -66391}}, {{9678, -76121}, {9679, -76121}}, 
     {{9681, -86136}, {9682, -86136}}, {{9684, -86348}, {9685, -86348}}, 
     {{9687, -91140}, {9688, -91140}}, {{9690, -100833}, {9691, -100833}}, 
     {{9693, -96157}, {9694, -96157}}, {{9696, -105813}, {9697, -105813}}, 
     {{9699, -120253}, {9700, -120253}}, {{9702, -115490}, {9703, -115490}}, 
     {{9705, -115137}, {9706, -115137}}, {{9708, -114824}, {9709, -114824}}, 
     {{9711, -124600}, {9712, -124600}}, {{9714, -124379}, {9715, -124379}}, 
     {{9717, -134048}, {9718, -134048}}, {{9720, -143816}, {9721, -143816}}, 
     {{9723, -148561}, {9724, -148561}}, {{9726, -153570}, {9727, -153570}}, 
     {{9729, -148748}, {9730, -148748}}, {{9732, -138985}, {9733, -138985}}, 
     {{9735, -143655}, {9736, -143655}}, {{9738, -148129}, {9739, -148129}}, 
     {{9741, -158262}, {9742, -158262}}, {{9744, -158328}, {9745, -158328}}, 
     {{9747, -158620}, {9748, -158620}}, {{9750, -163356}, {9751, -163356}}, 
     {{9753, -158625}, {9754, -158625}}, {{9756, -148612}, {9757, -148612}}, 
     {{9759, -133854}, {9760, -133854}}, {{9762, -133656}, {9763, -133656}}, 
     {{9765, -128810}, {9766, -128810}}, {{9768, -138378}, {9769, -138378}}, 
     {{9771, -143145}, {9772, -143145}}, {{9774, -138366}, {9775, -138366}}, 
     {{9777, -133490}, {9778, -133490}}, {{9780, -133160}, {9781, -133160}}, 
     {{9783, -143094}, {9784, -143094}}, {{9786, -143377}, {9787, -143377}}, 
     {{9789, -152880}, {9790, -152880}}, {{9792, -153031}, {9793, -153031}}, 
     {{9795, -157762}, {9796, -157762}}, {{9798, -148167}, {9799, -148167}}, 
     {{9801, -143034}, {9802, -143034}}, {{9804, -147944}, {9805, -147944}}, 
     {{9807, -152642}, {9808, -152642}}, {{9810, -147745}, {9811, -147745}}, 
     {{9813, -147508}, {9814, -147508}}, {{9816, -157142}, {9817, -157142}}, 
     {{9819, -157138}, {9820, -157138}}, {{9822, -166928}, {9823, -166928}}, 
     {{9825, -171780}, {9826, -171780}}, {{9828, -166750}, {9829, -166750}}, 
     {{9831, -181373}, {9832, -181373}}, {{9834, -181467}, {9835, -181467}}, 
     {{9837, -186182}, {9838, -186182}}, {{9840, -185635}, {9841, -185635}}, 
     {{9843, -180909}, {9844, -180909}}, {{9846, -185882}, {9847, -185882}}, 
     {{9849, -181026}, {9850, -181026}}, {{9852, -186175}, {9853, -186175}}, 
     {{9855, -186608}, {9856, -186608}}, {{9858, -186501}, {9859, -186501}}, 
     {{9861, -196322}, {9862, -196322}}, {{9864, -186382}, {9865, -186382}}, 
     {{9867, -171504}, {9868, -171504}}, {{9870, -171530}, {9871, -171530}}, 
     {{9873, -176759}, {9874, -176759}}, {{9876, -171572}, {9877, -171572}}, 
     {{9879, -186302}, {9880, -186302}}, {{9882, -181495}, {9883, -181495}}, 
     {{9885, -191213}, {9886, -191213}}, {{9888, -191469}, {9889, -191469}}, 
     {{9891, -191219}, {9892, -191219}}, {{9894, -181381}, {9895, -181381}}, 
     {{9897, -171531}, {9898, -171531}}, {{9900, -166576}, {9901, -166576}}, 
     {{9903, -161318}, {9904, -161318}}, {{9906, -161483}, {9907, -161483}}, 
     {{9909, -166111}, {9910, -166111}}, {{9912, -176188}, {9913, -176188}}, 
     {{9915, -171198}, {9916, -171198}}, {{9918, -166235}, {9919, -166235}}, 
     {{9921, -166052}, {9922, -166052}}, {{9924, -170803}, {9925, -170803}}, 
     {{9927, -175791}, {9928, -175791}}, {{9930, -175800}, {9931, -175800}}, 
     {{9933, -175747}, {9934, -175747}}, {{9936, -165955}, {9937, -165955}}, 
     {{9939, -151217}, {9940, -151217}}, {{9942, -161179}, {9943, -161179}}, 
     {{9945, -156201}, {9946, -156201}}, {{9948, -151060}, {9949, -151060}}, 
     {{9951, -160805}, {9952, -160805}}, {{9954, -155646}, {9955, -155646}}, 
     {{9957, -155453}, {9958, -155453}}, {{9960, -155482}, {9961, -155482}}, 
     {{9963, -155763}, {9964, -155763}}, {{9966, -145546}, {9967, -145546}}, 
     {{9969, -145388}, {9970, -145388}}, {{9972, -150383}, {9973, -150383}}, 
     {{9975, -150746}, {9976, -150746}}, {{9978, -150898}, {9979, -150898}}, 
     {{9981, -145712}, {9982, -145712}}, {{9984, -135612}, {9985, -135612}}, 
     {{9987, -120522}, {9988, -120522}}, {{9990, -115755}, {9991, -115755}}, 
     {{9993, -105672}, {9994, -105672}}, {{9996, -105724}, {9997, -105724}}, 
     {{9999, -95604}, {10000, -95604}}}
