# Supplementary material for: On Some Properties of the Hofstadter–Mertens Function
Source: Hindawi journal article supplement (doi:10.1155/2020/1816756), 2020-09-15
Supplement: f1 [file 1816756.f1.zip › Figure6.dat]

{Line[{{15	-30000}	{15	60000}}]
Line[{{22	-30000}	{22	60000}}]	Line[{{26	-30000}	{26	60000}}]
Line[{{35	-30000}	{35	60000}}]	Line[{{38	-30000}	{38	60000}}]
Line[{{55	-30000}	{55	60000}}]	Line[{{62	-30000}	{62	60000}}]
Line[{{69	-30000}	{69	60000}}]	Line[{{86	-30000}	{86	60000}}]
Line[{{122	-30000}	{122	60000}}]
Line[{{133	-30000}	{133	60000}}]
Line[{{142	-30000}	{142	60000}}]
Line[{{209	-30000}	{209	60000}}]
Line[{{249	-30000}	{249	60000}}]
Line[{{253	-30000}	{253	60000}}]
Line[{{262	-30000}	{262	60000}}]
Line[{{265	-30000}	{265	60000}}]
Line[{{267	-30000}	{267	60000}}]
Line[{{303	-30000}	{303	60000}}]
Line[{{326	-30000}	{326	60000}}]
Line[{{371	-30000}	{371	60000}}]
Line[{{382	-30000}	{382	60000}}]
Line[{{386	-30000}	{386	60000}}]
Line[{{390	-30000}	{390	60000}}]
Line[{{514	-30000}	{514	60000}}]
Line[{{626	-30000}	{626	60000}}]
Line[{{629	-30000}	{629	60000}}]
Line[{{633	-30000}	{633	60000}}]
Line[{{707	-30000}	{707	60000}}]
Line[{{714	-30000}	{714	60000}}]
Line[{{717	-30000}	{717	60000}}]
Line[{{746	-30000}	{746	60000}}]
Line[{{766	-30000}	{766	60000}}]
Line[{{831	-30000}	{831	60000}}]
Line[{{835	-30000}	{835	60000}}]
Line[{{1205	-30000}	{1205	60000}}]
Line[{{1226	-30000}	{1226	60000}}]
Line[{{1238	-30000}	{1238	60000}}]
Line[{{1241	-30000}	{1241	60000}}]
Line[{{1247	-30000}	{1247	60000}}]
Line[{{1253	-30000}	{1253	60000}}]
Line[{{1315	-30000}	{1315	60000}}]
Line[{{1497	-30000}	{1497	60000}}]
Line[{{1502	-30000}	{1502	60000}}]
Line[{{1509	-30000}	{1509	60000}}]
Line[{{1514	-30000}	{1514	60000}}]
Line[{{1517	-30000}	{1517	60000}}]
Line[{{1535	-30000}	{1535	60000}}]
Line[{{1577	-30000}	{1577	60000}}]
Line[{{1821	-30000}	{1821	60000}}]
Line[{{1829	-30000}	{1829	60000}}]
Line[{{1837	-30000}	{1837	60000}}]
Line[{{1883	-30000}	{1883	60000}}]
Line[{{1895	-30000}	{1895	60000}}]
Line[{{1921	-30000}	{1921	60000}}]
Line[{{2165	-30000}	{2165	60000}}]
Line[{{2302	-30000}	{2302	60000}}]
Line[{{2315	-30000}	{2315	60000}}]
Line[{{2346	-30000}	{2346	60000}}]
Line[{{2363	-30000}	{2363	60000}}]
Line[{{2369	-30000}	{2369	60000}}]
Line[{{2374	-30000}	{2374	60000}}]
Line[{{2497	-30000}	{2497	60000}}]
Line[{{2507	-30000}	{2507	60000}}]
Line[{{2545	-30000}	{2545	60000}}]
Line[{{2563	-30000}	{2563	60000}}]
Line[{{3046	-30000}	{3046	60000}}]
Line[{{3057	-30000}	{3057	60000}}]
Line[{{3065	-30000}	{3065	60000}}]
Line[{{3071	-30000}	{3071	60000}}]
Line[{{3091	-30000}	{3091	60000}}]
Line[{{3653	-30000}	{3653	60000}}]
Line[{{3666	-30000}	{3666	60000}}]
Line[{{4487	-30000}	{4487	60000}}]
Line[{{4501	-30000}	{4501	60000}}]
Line[{{4535	-30000}	{4535	60000}}]
Line[{{4555	-30000}	{4555	60000}}]
Line[{{4559	-30000}	{4559	60000}}]
Line[{{4562	-30000}	{4562	60000}}]
Line[{{4574	-30000}	{4574	60000}}]
Line[{{4686	-30000}	{4686	60000}}]
Line[{{5027	-30000}	{5027	60000}}]
Line[{{5065	-30000}	{5065	60000}}]
Line[{{5069	-30000}	{5069	60000}}]
Line[{{5079	-30000}	{5079	60000}}]
Line[{{5093	-30000}	{5093	60000}}]
Line[{{5149	-30000}	{5149	60000}}]
Line[{{5163	-30000}	{5163	60000}}]
Line[{{5183	-30000}	{5183	60000}}]
Line[{{5186	-30000}	{5186	60000}}]
Line[{{5241	-30000}	{5241	60000}}]
Line[{{5299	-30000}	{5299	60000}}]
Line[{{5315	-30000}	{5315	60000}}]
Line[{{5865	-30000}	{5865	60000}}]
Line[{{5938	-30000}	{5938	60000}}]
Line[{{5941	-30000}	{5941	60000}}]
Line[{{5951	-30000}	{5951	60000}}]
Line[{{5970	-30000}	{5970	60000}}]
Line[{{5977	-30000}	{5977	60000}}]
Line[{{5983	-30000}	{5983	60000}}]
Line[{{5993	-30000}	{5993	60000}}]
Line[{{5997	-30000}	{5997	60000}}]}
