# Supplementary material for: On Some Properties of the Hofstadter–Mertens Function
Source: Hindawi journal article supplement (doi:10.1155/2020/1816756), 2020-09-15
Supplement: f1 [file 1816756.f1.zip › Figure7.dat]

    {{1, 1}, {2, 0}, {3, -2}, {4, -2}, {5, -5}, {6, -1}, {7, -6}, 
     {8, -6}, {9, -6}, {10, 0}, {11, -6}, {12, -6}, {13, -14}, {14, -6}, 
     {15, 4}, {16, 4}, {17, -6}, {18, -6}, {19, -17}, {20, -17}, {21, -5}, 
     {22, 7}, {23, -5}, {24, -5}, {25, -5}, {26, 9}, {27, 9}, {28, 9}, 
     {29, -7}, {30, -23}, {31, -43}, {32, -43}, {33, -26}, {34, -6}, 
     {35, 15}, {36, 15}, {37, -5}, {38, 17}, {39, 38}, {40, 38}, {41, 15}, 
     {42, -8}, {43, -32}, {44, -32}, {45, -32}, {46, -8}, {47, -32}, 
     {48, -32}, {49, -32}, {50, -32}, {51, -2}, {52, -2}, {53, -28}, 
     {54, -28}, {55, 2}, {56, 2}, {57, 34}, {58, 64}, {59, 32}, {60, 32}, 
     {61, 0}, {62, 32}, {63, 32}, {64, 32}, {65, 63}, {66, 25}, {67, -10}, 
     {68, -10}, {69, 29}, {70, -11}, {71, -48}, {72, -48}, {73, -88}, 
     {74, -49}, {75, -49}, {76, -49}, {77, -7}, {78, -47}, {79, -88}, 
     {80, -88}, {81, -88}, {82, -45}, {83, -88}, {84, -88}, {85, -44}, 
     {86, 1}, {87, 48}, {88, 48}, {89, 2}, {90, 2}, {91, 50}, {92, 50}, 
     {93, 98}, {94, 146}, {95, 194}, {96, 194}, {97, 153}, {98, 153}, 
     {99, 153}, {100, 153}, {101, 105}, {102, 51}, {103, -3}, {104, -3}, 
     {105, -63}, {106, -11}, {107, -65}, {108, -65}, {109, -125}, 
     {110, -178}, {111, -118}, {112, -118}, {113, -170}, {114, -232}, 
     {115, -166}, {116, -166}, {117, -166}, {118, -98}, {119, -36}, 
     {120, -36}, {121, -36}, {122, 22}, {123, 83}, {124, 83}, {125, 83}, 
     {126, 83}, {127, 15}, {128, 15}, {129, 78}, {130, 5}, {131, -58}, 
     {132, -58}, {133, 14}, {134, 86}, {135, 86}, {136, 86}, {137, 15}, 
     {138, -62}, {139, -127}, {140, -127}, {141, -56}, {142, 13}, {143, 90}, 
     {144, 90}, {145, 163}, {146, 240}, {147, 240}, {148, 240}, {149, 160}, 
     {150, 160}, {151, 85}, {152, 85}, {153, 85}, {154, 5}, {155, 85}, 
     {156, 85}, {157, 2}, {158, 85}, {159, 163}, {160, 163}, {161, 245}, 
     {162, 245}, {163, 161}, {164, 161}, {165, 73}, {166, 156}, {167, 69}, 
     {168, 69}, {169, 69}, {170, -17}, {171, -17}, {172, -17}, {173, -104}, 
     {174, -196}, {175, -196}, {176, -196}, {177, -104}, {178, -12}, 
     {179, -106}, {180, -106}, {181, -199}, {182, -293}, {183, -199}, 
     {184, -199}, {185, -105}, {186, -201}, {187, -105}, {188, -105}, 
     {189, -105}, {190, -201}, {191, -297}, {192, -297}, {193, -369}, 
     {194, -273}, {195, -388}, {196, -388}, {197, -472}, {198, -472}, 
     {199, -582}, {200, -582}, {201, -476}, {202, -352}, {203, -270}, 
     {204, -270}, {205, -159}, {206, -51}, {207, -51}, {208, -51}, {209, 57}, 
     {210, 163}, {211, 49}, {212, 49}, {213, 163}, {214, 272}, {215, 372}, 
     {216, 372}, {217, 492}, {218, 604}, {219, 712}, {220, 712}, {221, 818}, 
     {222, 713}, {223, 583}, {224, 583}, {225, 583}, {226, 698}, {227, 586}, 
     {228, 586}, {229, 466}, {230, 352}, {231, 230}, {232, 230}, {233, 110}, 
     {234, 110}, {235, 248}, {236, 248}, {237, 370}, {238, 251}, {239, 131}, 
     {240, 131}, {241, -1}, {242, -1}, {243, -1}, {244, -1}, {245, -1}, 
     {246, -126}, {247, -5}, {248, -5}, {249, 117}, {250, 117}, {251, -12}, 
     {252, -12}, {253, 137}, {254, 274}, {255, 154}, {256, 154}, {257, 11}, 
     {258, -135}, {259, -28}, {260, -28}, {261, -28}, {262, 111}, {263, -24}, 
     {264, -24}, {265, 122}, {266, -13}, {267, 130}, {268, 130}, {269, -21}, 
     {270, -21}, {271, -156}, {272, -156}, {273, -304}, {274, -156}, 
     {275, -156}, {276, -156}, {277, -299}, {278, -147}, {279, -147}, 
     {280, -147}, {281, -298}, {282, -438}, {283, -586}, {284, -586}, 
     {285, -737}, {286, -896}, {287, -771}, {288, -771}, {289, -771}, 
     {290, -919}, {291, -765}, {292, -765}, {293, -901}, {294, -901}, 
     {295, -746}, {296, -746}, {297, -746}, {298, -584}, {299, -433}, 
     {300, -433}, {301, -279}, {302, -130}, {303, 30}, {304, 30}, {305, 182}, 
     {306, 182}, {307, 20}, {308, 20}, {309, 179}, {310, 26}, {311, -139}, 
     {312, -139}, {313, -293}, {314, -125}, {315, -125}, {316, -125}, 
     {317, -285}, {318, -453}, {319, -300}, {320, -300}, {321, -130}, 
     {322, -289}, {323, -128}, {324, -128}, {325, -128}, {326, 40}, 
     {327, 201}, {328, 201}, {329, 372}, {330, 533}, {331, 362}, {332, 362}, 
     {333, 362}, {334, 534}, {335, 706}, {336, 706}, {337, 531}, {338, 531}, 
     {339, 702}, {340, 702}, {341, 876}, {342, 876}, {343, 876}, {344, 876}, 
     {345, 700}, {346, 874}, {347, 697}, {348, 697}, {349, 522}, {350, 522}, 
     {351, 522}, {352, 522}, {353, 345}, {354, 167}, {355, 351}, {356, 351}, 
     {357, 172}, {358, 358}, {359, 179}, {360, 179}, {361, 179}, {362, 363}, 
     {363, 363}, {364, 363}, {365, 550}, {366, 362}, {367, 176}, {368, 176}, 
     {369, 176}, {370, -14}, {371, 173}, {372, 173}, {373, -17}, {374, -209}, 
     {375, -209}, {376, -209}, {377, -19}, {378, -19}, {379, -211}, 
     {380, -211}, {381, -19}, {382, 173}, {383, -19}, {384, -19}, 
     {385, -154}, {386, 48}, {387, 48}, {388, 48}, {389, -152}, {390, 68}, 
     {391, 254}, {392, 254}, {393, 456}, {394, 698}, {395, 847}, {396, 847}, 
     {397, 618}, {398, 789}, {399, 596}, {400, 596}, {401, 408}, {402, 215}, 
     {403, 421}, {404, 421}, {405, 421}, {406, 228}, {407, 448}, {408, 448}, 
     {409, 238}, {410, 36}, {411, 250}, {412, 250}, {413, 432}, {414, 432}, 
     {415, 666}, {416, 666}, {417, 874}, {418, 659}, {419, 444}, {420, 444}, 
     {421, 226}, {422, 420}, {423, 420}, {424, 420}, {425, 420}, {426, 184}, 
     {427, 394}, {428, 394}, {429, 190}, {430, -21}, {431, -251}, 
     {432, -251}, {433, -415}, {434, -649}, {435, -890}, {436, -890}, 
     {437, -676}, {438, -896}, {439, -1118}, {440, -1118}, {441, -1118}, 
     {442, -1340}, {443, -1552}, {444, -1552}, {445, -1324}, {446, -1094}, 
     {447, -866}, {448, -866}, {449, -1080}, {450, -1080}, {451, -828}, 
     {452, -828}, {453, -586}, {454, -353}, {455, -572}, {456, -572}, 
     {457, -802}, {458, -587}, {459, -587}, {460, -587}, {461, -829}, 
     {462, -601}, {463, -845}, {464, -845}, {465, -1073}, {466, -835}, 
     {467, -1075}, {468, -1075}, {469, -826}, {470, -1054}, {471, -816}, 
     {472, -816}, {473, -568}, {474, -805}, {475, -805}, {476, -805}, 
     {477, -805}, {478, -555}, {479, -789}, {480, -789}, {481, -555}, 
     {482, -293}, {483, -521}, {484, -521}, {485, -235}, {486, -235}, 
     {487, -470}, {488, -470}, {489, -221}, {490, -221}, {491, -463}, 
     {492, -463}, {493, -202}, {494, -435}, {495, -435}, {496, -435}, 
     {497, -192}, {498, -426}, {499, -695}, {500, -695}, {501, -451}, 
     {502, -187}, {503, -414}, {504, -414}, {505, -141}, {506, -381}, 
     {507, -381}, {508, -381}, {509, -626}, {510, -364}, {511, -107}, 
     {512, -107}, {513, -107}, {514, 168}, {515, 420}, {516, 420}, 
     {517, 712}, {518, 462}, {519, 725}, {520, 725}, {521, 461}, {522, 461}, 
     {523, 238}, {524, 238}, {525, 238}, {526, 504}, {527, 790}, {528, 790}, 
     {529, 790}, {530, 501}, {531, 501}, {532, 501}, {533, 780}, {534, 524}, 
     {535, 776}, {536, 776}, {537, 1066}, {538, 1330}, {539, 1330}, 
     {540, 1330}, {541, 1039}, {542, 1314}, {543, 1559}, {544, 1559}, 
     {545, 1849}, {546, 2095}, {547, 1798}, {548, 1798}, {549, 1798}, 
     {550, 1798}, {551, 2075}, {552, 2075}, {553, 2354}, {554, 2626}, 
     {555, 2334}, {556, 2334}, {557, 2034}, {558, 2034}, {559, 2261}, 
     {560, 2261}, {561, 1960}, {562, 2220}, {563, 1921}, {564, 1921}, 
     {565, 2176}, {566, 2487}, {567, 2487}, {568, 2487}, {569, 2205}, 
     {570, 2491}, {571, 2187}, {572, 2187}, {573, 2489}, {574, 2194}, 
     {575, 2194}, {576, 2194}, {577, 1898}, {578, 1898}, {579, 2200}, 
     {580, 2200}, {581, 2472}, {582, 2167}, {583, 2484}, {584, 2484}, 
     {585, 2484}, {586, 2812}, {587, 2550}, {588, 2550}, {589, 2851}, 
     {590, 2550}, {591, 2846}, {592, 2846}, {593, 2566}, {594, 2566}, 
     {595, 2269}, {596, 2269}, {597, 2575}, {598, 2263}, {599, 2002}, 
     {600, 2002}, {601, 1681}, {602, 1394}, {603, 1394}, {604, 1394}, 
     {605, 1394}, {606, 1106}, {607, 801}, {608, 801}, {609, 507}, 
     {610, 200}, {611, 515}, {612, 515}, {613, 193}, {614, 513}, {615, 222}, 
     {616, 222}, {617, -99}, {618, -408}, {619, -723}, {620, -723}, 
     {621, -723}, {622, -414}, {623, -92}, {624, -92}, {625, -92}, 
     {626, 216}, {627, -92}, {628, -92}, {629, 232}, {630, 232}, {631, -102}, 
     {632, -102}, {633, 202}, {634, 528}, {635, 858}, {636, 858}, {637, 858}, 
     {638, 545}, {639, 545}, {640, 545}, {641, 208}, {642, -114}, 
     {643, -439}, {644, -439}, {645, -775}, {646, -1100}, {647, -1424}, 
     {648, -1424}, {649, -1107}, {650, -1107}, {651, -1451}, {652, -1451}, 
     {653, -1780}, {654, -2112}, {655, -1783}, {656, -1783}, {657, -1783}, 
     {658, -2112}, {659, -2434}, {660, -2434}, {661, -2774}, {662, -2445}, 
     {663, -2778}, {664, -2778}, {665, -3109}, {666, -3109}, {667, -2769}, 
     {668, -2769}, {669, -2437}, {670, -2775}, {671, -2437}, {672, -2437}, 
     {673, -2780}, {674, -2448}, {675, -2448}, {676, -2448}, {677, -2781}, 
     {678, -3124}, {679, -2782}, {680, -2782}, {681, -2443}, {682, -2793}, 
     {683, -3134}, {684, -3134}, {685, -2790}, {686, -2790}, {687, -2441}, 
     {688, -2441}, {689, -2093}, {690, -1744}, {691, -2094}, {692, -2094}, 
     {693, -2094}, {694, -1746}, {695, -1393}, {696, -1393}, {697, -1046}, 
     {698, -694}, {699, -333}, {700, -333}, {701, -688}, {702, -688}, 
     {703, -328}, {704, -328}, {705, -681}, {706, -322}, {707, 38}, 
     {708, 38}, {709, -321}, {710, -676}, {711, -676}, {712, -676}, 
     {713, -317}, {714, 44}, {715, -314}, {716, -314}, {717, 42}, {718, 408}, 
     {719, 45}, {720, 45}, {721, 415}, {722, 415}, {723, 776}, {724, 776}, 
     {725, 776}, {726, 776}, {727, 413}, {728, 413}, {729, 413}, {730, 41}, 
     {731, 399}, {732, 399}, {733, 31}, {734, 398}, {735, 398}, {736, 398}, 
     {737, 772}, {738, 772}, {739, 399}, {740, 399}, {741, 25}, {742, -351}, 
     {743, -725}, {744, -725}, {745, -350}, {746, 27}, {747, 27}, {748, 27}, 
     {749, 402}, {750, 402}, {751, 20}, {752, 20}, {753, 394}, {754, 14}, 
     {755, 394}, {756, 394}, {757, 14}, {758, 398}, {759, 18}, {760, 18}, 
     {761, -364}, {762, -748}, {763, -364}, {764, -364}, {765, -364}, 
     {766, 20}, {767, 404}, {768, 404}, {769, 126}, {770, 524}, {771, 975}, 
     {772, 975}, {773, 602}, {774, 602}, {775, 602}, {776, 602}, {777, 247}, 
     {778, 664}, {779, 1034}, {780, 1034}, {781, 1450}, {782, 1020}, 
     {783, 1020}, {784, 1020}, {785, 1414}, {786, 998}, {787, 609}, 
     {788, 609}, {789, 1043}, {790, 653}, {791, 1020}, {792, 1020}, 
     {793, 1512}, {794, 1796}, {795, 1379}, {796, 1379}, {797, 1012}, 
     {798, 1420}, {799, 1836}, {800, 1836}, {801, 1836}, {802, 2266}, 
     {803, 2717}, {804, 2717}, {805, 2300}, {806, 1886}, {807, 2308}, 
     {808, 2308}, {809, 1911}, {810, 1911}, {811, 1472}, {812, 1472}, 
     {813, 1852}, {814, 1425}, {815, 1854}, {816, 1854}, {817, 2262}, 
     {818, 2660}, {819, 2660}, {820, 2660}, {821, 2238}, {822, 1770}, 
     {823, 1398}, {824, 1398}, {825, 1398}, {826, 1002}, {827, 586}, 
     {828, 586}, {829, 212}, {830, -232}, {831, 208}, {832, 208}, {833, 208}, 
     {834, -235}, {835, 176}, {836, 176}, {837, 176}, {838, 608}, {839, 200}, 
     {840, 200}, {841, 200}, {842, 630}, {843, 1040}, {844, 1040}, 
     {845, 1040}, {846, 1040}, {847, 1040}, {848, 1040}, {849, 1460}, 
     {850, 1460}, {851, 1893}, {852, 1893}, {853, 1470}, {854, 1011}, 
     {855, 1011}, {856, 1011}, {857, 555}, {858, 930}, {859, 496}, 
     {860, 496}, {861, 115}, {862, 522}, {863, 8}, {864, 8}, {865, 416}, 
     {866, 846}, {867, 846}, {868, 846}, {869, 1307}, {870, 1756}, 
     {871, 2152}, {872, 2152}, {873, 2152}, {874, 1762}, {875, 1762}, 
     {876, 1762}, {877, 1381}, {878, 1826}, {879, 2294}, {880, 2294}, 
     {881, 1890}, {882, 1890}, {883, 1422}, {884, 1422}, {885, 969}, 
     {886, 1383}, {887, 901}, {888, 901}, {889, 1364}, {890, 916}, 
     {891, 916}, {892, 916}, {893, 1352}, {894, 917}, {895, 1398}, 
     {896, 1398}, {897, 976}, {898, 1408}, {899, 1893}, {900, 1893}, 
     {901, 2327}, {902, 1878}, {903, 1396}, {904, 1396}, {905, 1879}, 
     {906, 1387}, {907, 967}, {908, 967}, {909, 967}, {910, 1418}, 
     {911, 940}, {912, 940}, {913, 1395}, {914, 1858}, {915, 1417}, 
     {916, 1417}, {917, 1881}, {918, 1881}, {919, 1447}, {920, 1447}, 
     {921, 1904}, {922, 2362}, {923, 2828}, {924, 2828}, {925, 2828}, 
     {926, 3306}, {927, 3306}, {928, 3306}, {929, 2843}, {930, 3327}, 
     {931, 3327}, {932, 3327}, {933, 3786}, {934, 4255}, {935, 3779}, 
     {936, 3779}, {937, 3294}, {938, 2814}, {939, 3290}, {940, 3290}, 
     {941, 2831}, {942, 2365}, {943, 2838}, {944, 2838}, {945, 2838}, 
     {946, 2389}, {947, 1916}, {948, 1916}, {949, 2368}, {950, 2368}, 
     {951, 2886}, {952, 2886}, {953, 2411}, {954, 2411}, {955, 2912}, 
     {956, 2912}, {957, 2398}, {958, 2881}, {959, 3347}, {960, 3347}, 
     {961, 3347}, {962, 2885}, {963, 2885}, {964, 2885}, {965, 3367}, 
     {966, 3830}, {967, 3271}, {968, 3271}, {969, 2830}, {970, 2319}, 
     {971, 1792}, {972, 1792}, {973, 2249}, {974, 2814}, {975, 2814}, 
     {976, 2814}, {977, 2322}, {978, 1841}, {979, 2310}, {980, 2310}, 
     {981, 2310}, {982, 2819}, {983, 2324}, {984, 2324}, {985, 2837}, 
     {986, 2349}, {987, 1843}, {988, 1843}, {989, 2299}, {990, 2299}, 
     {991, 1804}, {992, 1804}, {993, 2290}, {994, 1740}, {995, 2213}, 
     {996, 2213}, {997, 1608}, {998, 2100}, {999, 2100}, {1000, 2100}, 
     {1001, 1567}, {1002, 1061}, {1003, 1532}, {1004, 1532}, {1005, 1024}, 
     {1006, 1519}, {1007, 2044}, {1008, 2044}, {1009, 1564}, {1010, 1023}, 
     {1011, 1484}, {1012, 1484}, {1013, 968}, {1014, 968}, {1015, 443}, 
     {1016, 443}, {1017, 443}, {1018, 969}, {1019, 437}, {1020, 437}, 
     {1021, -104}, {1022, -588}, {1023, -1108}, {1024, -1108}, {1025, -1108}, 
     {1026, -1108}, {1027, -596}, {1028, -596}, {1029, -596}, {1030, -1091}, 
     {1031, -1605}, {1032, -1605}, {1033, -2129}, {1034, -2624}, 
     {1035, -2624}, {1036, -2624}, {1037, -2095}, {1038, -2573}, 
     {1039, -3136}, {1040, -3136}, {1041, -2611}, {1042, -2029}, 
     {1043, -1537}, {1044, -1537}, {1045, -2068}, {1046, -1541}, 
     {1047, -1013}, {1048, -1013}, {1049, -1522}, {1050, -1522}, 
     {1051, -2031}, {1052, -2031}, {1053, -2031}, {1054, -2548}, 
     {1055, -2031}, {1056, -2031}, {1057, -1456}, {1058, -1456}, 
     {1059, -972}, {1060, -972}, {1061, -1498}, {1062, -1498}, {1063, -2090}, 
     {1064, -2090}, {1065, -2617}, {1066, -3131}, {1067, -2568}, 
     {1068, -2568}, {1069, -3111}, {1070, -3651}, {1071, -3651}, 
     {1072, -3651}, {1073, -3058}, {1074, -3544}, {1075, -3544}, 
     {1076, -3544}, {1077, -3007}, {1078, -3007}, {1079, -2499}, 
     {1080, -2499}, {1081, -1952}, {1082, -1438}, {1083, -1438}, 
     {1084, -1438}, {1085, -1956}, {1086, -2521}, {1087, -3074}, 
     {1088, -3074}, {1089, -3074}, {1090, -3618}, {1091, -4183}, 
     {1092, -4183}, {1093, -4711}, {1094, -4111}, {1095, -4644}, 
     {1096, -4644}, {1097, -5234}, {1098, -5234}, {1099, -4660}, 
     {1100, -4660}, {1101, -4083}, {1102, -4612}, {1103, -5173}, 
     {1104, -5173}, {1105, -5777}, {1106, -6336}, {1107, -6336}, 
     {1108, -6336}, {1109, -6910}, {1110, -6336}, {1111, -5756}, 
     {1112, -5756}, {1113, -6290}, {1114, -5675}, {1115, -5146}, 
     {1116, -5146}, {1117, -5768}, {1118, -6332}, {1119, -5797}, 
     {1120, -5797}, {1121, -5164}, {1122, -4598}, {1123, -5138}, 
     {1124, -5138}, {1125, -5138}, {1126, -4633}, {1127, -4633}, 
     {1128, -4633}, {1129, -5207}, {1130, -5713}, {1131, -6334}, 
     {1132, -6334}, {1133, -5788}, {1134, -5788}, {1135, -5241}, 
     {1136, -5241}, {1137, -4682}, {1138, -4096}, {1139, -3513}, 
     {1140, -3513}, {1141, -2936}, {1142, -2395}, {1143, -2395}, 
     {1144, -2395}, {1145, -1802}, {1146, -2395}, {1147, -1851}, 
     {1148, -1851}, {1149, -1293}, {1150, -1293}, {1151, -1824}, 
     {1152, -1824}, {1153, -2389}, {1154, -1788}, {1155, -1215}, 
     {1156, -1215}, {1157, -665}, {1158, -1245}, {1159, -649}, {1160, -649}, 
     {1161, -649}, {1162, -1293}, {1163, -1871}, {1164, -1871}, 
     {1165, -1308}, {1166, -1864}, {1167, -1235}, {1168, -1235}, 
     {1169, -660}, {1170, -660}, {1171, -1235}, {1172, -1235}, {1173, -1843}, 
     {1174, -1244}, {1175, -1244}, {1176, -1244}, {1177, -692}, 
     {1178, -1305}, {1179, -1305}, {1180, -1305}, {1181, -1883}, 
     {1182, -2518}, {1183, -2518}, {1184, -2518}, {1185, -3170}, 
     {1186, -2585}, {1187, -3124}, {1188, -3124}, {1189, -2493}, 
     {1190, -1970}, {1191, -1313}, {1192, -1313}, {1193, -1882}, 
     {1194, -2510}, {1195, -1922}, {1196, -1922}, {1197, -1922}, 
     {1198, -1313}, {1199, -691}, {1200, -691}, {1201, -1314}, {1202, -703}, 
     {1203, -99}, {1204, -99}, {1205, 527}, {1206, 527}, {1207, 1094}, 
     {1208, 1094}, {1209, 489}, {1210, 489}, {1211, 1063}, {1212, 1063}, 
     {1213, 445}, {1214, 1046}, {1215, 1046}, {1216, 1046}, {1217, 429}, 
     {1218, 1058}, {1219, 1646}, {1220, 1646}, {1221, 1055}, {1222, 425}, 
     {1223, -178}, {1224, -178}, {1225, -178}, {1226, 434}, {1227, 1035}, 
     {1228, 1035}, {1229, 377}, {1230, 956}, {1231, 339}, {1232, 339}, 
     {1233, 339}, {1234, 972}, {1235, 397}, {1236, 397}, {1237, -253}, 
     {1238, 341}, {1239, -296}, {1240, -296}, {1241, 335}, {1242, 335}, 
     {1243, 940}, {1244, 940}, {1245, 314}, {1246, -332}, {1247, 299}, 
     {1248, 299}, {1249, -347}, {1250, -347}, {1251, -347}, {1252, -347}, 
     {1253, 292}, {1254, 903}, {1255, 1522}, {1256, 1522}, {1257, 2142}, 
     {1258, 1528}, {1259, 869}, {1260, 869}, {1261, 1447}, {1262, 2101}, 
     {1263, 2739}, {1264, 2739}, {1265, 2104}, {1266, 1426}, {1267, 2050}, 
     {1268, 2050}, {1269, 2050}, {1270, 1385}, {1271, 1960}, {1272, 1960}, 
     {1273, 2622}, {1274, 2622}, {1275, 2622}, {1276, 2622}, {1277, 1978}, 
     {1278, 1978}, {1279, 1331}, {1280, 1331}, {1281, 678}, {1282, 1346}, 
     {1283, 748}, {1284, 748}, {1285, 1420}, {1286, 2044}, {1287, 2044}, 
     {1288, 2044}, {1289, 1417}, {1290, 2064}, {1291, 1409}, {1292, 1409}, 
     {1293, 2032}, {1294, 2691}, {1295, 2039}, {1296, 2039}, {1297, 1388}, 
     {1298, 735}, {1299, 1393}, {1300, 1393}, {1301, 739}, {1302, 1405}, 
     {1303, 755}, {1304, 755}, {1305, 755}, {1306, 1403}, {1307, 748}, 
     {1308, 748}, {1309, 93}, {1310, -557}, {1311, -1230}, {1312, -1230}, 
     {1313, -569}, {1314, -569}, {1315, 107}, {1316, 107}, {1317, 784}, 
     {1318, 1465}, {1319, 830}, {1320, 830}, {1321, 152}, {1322, 793}, 
     {1323, 793}, {1324, 793}, {1325, 793}, {1326, 1468}, {1327, 820}, 
     {1328, 820}, {1329, 1488}, {1330, 2150}, {1331, 2150}, {1332, 2150}, 
     {1333, 2823}, {1334, 2150}, {1335, 1492}, {1336, 1492}, {1337, 2174}, 
     {1338, 1512}, {1339, 2189}, {1340, 2189}, {1341, 2189}, {1342, 1512}, 
     {1343, 2177}, {1344, 2177}, {1345, 2855}, {1346, 3542}, {1347, 4215}, 
     {1348, 4215}, {1349, 4889}, {1350, 4889}, {1351, 5565}, {1352, 5565}, 
     {1353, 4887}, {1354, 5565}, {1355, 6231}, {1356, 6231}, {1357, 6912}, 
     {1358, 6246}, {1359, 6246}, {1360, 6246}, {1361, 5559}, {1362, 4880}, 
     {1363, 5572}, {1364, 5572}, {1365, 6248}, {1366, 6940}, {1367, 6243}, 
     {1368, 6243}, {1369, 6243}, {1370, 5549}, {1371, 6221}, {1372, 6221}, 
     {1373, 5533}, {1374, 4844}, {1375, 4844}, {1376, 4844}, {1377, 4844}, 
     {1378, 4150}, {1379, 4833}, {1380, 4833}, {1381, 4135}, {1382, 4830}, 
     {1383, 5520}, {1384, 5520}, {1385, 6221}, {1386, 6221}, {1387, 6915}, 
     {1388, 6915}, {1389, 7614}, {1390, 6916}, {1391, 7616}, {1392, 7616}, 
     {1393, 8319}, {1394, 7612}, {1395, 7612}, {1396, 7612}, {1397, 8324}, 
     {1398, 7631}, {1399, 6923}, {1400, 6923}, {1401, 7623}, {1402, 8325}, 
     {1403, 9040}, {1404, 9040}, {1405, 9742}, {1406, 9025}, {1407, 8323}, 
     {1408, 8323}, {1409, 7610}, {1410, 8312}, {1411, 9023}, {1412, 9023}, 
     {1413, 9023}, {1414, 8313}, {1415, 9026}, {1416, 9026}, {1417, 9736}, 
     {1418, 10454}, {1419, 9740}, {1420, 9740}, {1421, 9740}, {1422, 9740}, 
     {1423, 9022}, {1424, 9022}, {1425, 9022}, {1426, 8301}, {1427, 7585}, 
     {1428, 7585}, {1429, 6869}, {1430, 7589}, {1431, 7589}, {1432, 7589}, 
     {1433, 6869}, {1434, 6142}, {1435, 5427}, {1436, 5427}, {1437, 6155}, 
     {1438, 6869}, {1439, 6137}, {1440, 6137}, {1441, 6857}, {1442, 6127}, 
     {1443, 5407}, {1444, 5407}, {1445, 5407}, {1446, 4679}, {1447, 3957}, 
     {1448, 3957}, {1449, 3957}, {1450, 3957}, {1451, 3240}, {1452, 3240}, 
     {1453, 2496}, {1454, 3214}, {1455, 2476}, {1456, 2476}, {1457, 3202}, 
     {1458, 3202}, {1459, 2466}, {1460, 2466}, {1461, 3206}, {1462, 2472}, 
     {1463, 1739}, {1464, 1739}, {1465, 2488}, {1466, 3216}, {1467, 3216}, 
     {1468, 3216}, {1469, 3956}, {1470, 3956}, {1471, 3235}, {1472, 3235}, 
     {1473, 3980}, {1474, 3240}, {1475, 3240}, {1476, 3240}, {1477, 3975}, 
     {1478, 4721}, {1479, 3977}, {1480, 3977}, {1481, 3227}, {1482, 3978}, 
     {1483, 3233}, {1484, 3233}, {1485, 3233}, {1486, 3980}, {1487, 3235}, 
     {1488, 3235}, {1489, 2485}, {1490, 1737}, {1491, 989}, {1492, 989}, 
     {1493, 240}, {1494, 240}, {1495, -513}, {1496, -513}, {1497, 240}, 
     {1498, -510}, {1499, -1262}, {1500, -1262}, {1501, -510}, {1502, 246}, 
     {1503, 246}, {1504, 246}, {1505, -511}, {1506, -1260}, {1507, -498}, 
     {1508, -498}, {1509, 262}, {1510, -490}, {1511, -1252}, {1512, -1252}, 
     {1513, -488}, {1514, 272}, {1515, -490}, {1516, -490}, {1517, 264}, 
     {1518, 1028}, {1519, 1028}, {1520, 1028}, {1521, 1028}, {1522, 1920}, 
     {1523, 1308}, {1524, 1308}, {1525, 1308}, {1526, 584}, {1527, 1388}, 
     {1528, 1388}, {1529, 2123}, {1530, 2123}, {1531, 1316}, {1532, 1316}, 
     {1533, 527}, {1534, -262}, {1535, 492}, {1536, 492}, {1537, 1227}, 
     {1538, 2050}, {1539, 2050}, {1540, 2050}, {1541, 2959}, {1542, 2187}, 
     {1543, 1410}, {1544, 1410}, {1545, 482}, {1546, 1243}, {1547, 512}, 
     {1548, 512}, {1549, -268}, {1550, -268}, {1551, -1089}, {1552, -1089}, 
     {1553, -1888}, {1554, -1064}, {1555, -322}, {1556, -322}, {1557, -322}, 
     {1558, -1082}, {1559, -1882}, {1560, -1882}, {1561, -1132}, 
     {1562, -1916}, {1563, -1166}, {1564, -1166}, {1565, -359}, {1566, -359}, 
     {1567, -1160}, {1568, -1160}, {1569, -197}, {1570, -864}, {1571, -1606}, 
     {1572, -1606}, {1573, -1606}, {1574, -885}, {1575, -885}, {1576, -885}, 
     {1577, 4}, {1578, -622}, {1579, -1446}, {1580, -1446}, {1581, -2189}, 
     {1582, -2965}, {1583, -3813}, {1584, -3813}, {1585, -3161}, 
     {1586, -4028}, {1587, -4028}, {1588, -4028}, {1589, -3236}, 
     {1590, -2402}, {1591, -1606}, {1592, -1606}, {1593, -1606}, 
     {1594, -739}, {1595, -1441}, {1596, -1441}, {1597, -2312}, 
     {1598, -3042}, {1599, -3870}, {1600, -3870}, {1601, -4633}, 
     {1602, -4633}, {1603, -3757}, {1604, -3757}, {1605, -4537}, 
     {1606, -5341}, {1607, -6208}, {1608, -6208}, {1609, -7014}, 
     {1610, -6188}, {1611, -6188}, {1612, -6188}, {1613, -7100}, 
     {1614, -7882}, {1615, -8658}, {1616, -8658}, {1617, -8658}, 
     {1618, -7873}, {1619, -8767}, {1620, -8767}, {1621, -9562}, 
     {1622, -8738}, {1623, -7872}, {1624, -7872}, {1625, -7872}, 
     {1626, -8674}, {1627, -9518}, {1628, -9518}, {1629, -9518}, 
     {1630, -10344}, {1631, -9511}, {1632, -9511}, {1633, -8608}, 
     {1634, -9335}, {1635, -10187}, {1636, -10187}, {1637, -10965}, 
     {1638, -10965}, {1639, -10210}, {1640, -10210}, {1641, -9386}, 
     {1642, -8580}, {1643, -7697}, {1644, -7697}, {1645, -8521}, 
     {1646, -7669}, {1647, -7669}, {1648, -7669}, {1649, -6763}, 
     {1650, -6763}, {1651, -6004}, {1652, -6004}, {1653, -6855}, 
     {1654, -5961}, {1655, -5210}, {1656, -5210}, {1657, -6092}, 
     {1658, -5310}, {1659, -6046}, {1660, -6046}, {1661, -5182}, 
     {1662, -5974}, {1663, -6786}, {1664, -6786}, {1665, -6786}, 
     {1666, -6786}, {1667, -7517}, {1668, -7517}, {1669, -8373}, 
     {1670, -9175}, {1671, -8285}, {1672, -8285}, {1673, -7638}, 
     {1674, -7638}, {1675, -7638}, {1676, -7638}, {1677, -8580}, 
     {1678, -7700}, {1679, -6910}, {1680, -6910}, {1681, -6910}, 
     {1682, -6910}, {1683, -6910}, {1684, -6910}, {1685, -5977}, 
     {1686, -6769}, {1687, -5908}, {1688, -5908}, {1689, -5091}, 
     {1690, -5091}, {1691, -4331}, {1692, -4331}, {1693, -5238}, 
     {1694, -5238}, {1695, -6095}, {1696, -6095}, {1697, -6893}, 
     {1698, -7731}, {1699, -8546}, {1700, -8546}, {1701, -8546}, 
     {1702, -9424}, {1703, -8508}, {1704, -8508}, {1705, -9409}, 
     {1706, -8529}, {1707, -7699}, {1708, -7699}, {1709, -8594}, 
     {1710, -8594}, {1711, -7761}, {1712, -7761}, {1713, -6884}, 
     {1714, -6044}, {1715, -6044}, {1716, -6044}, {1717, -5246}, 
     {1718, -4348}, {1719, -4348}, {1720, -4348}, {1721, -5209}, 
     {1722, -4383}, {1723, -5212}, {1724, -5212}, {1725, -5212}, 
     {1726, -4400}, {1727, -3551}, {1728, -3551}, {1729, -4393}, 
     {1730, -5257}, {1731, -4337}, {1732, -4337}, {1733, -5199}, 
     {1734, -5199}, {1735, -4308}, {1736, -4308}, {1737, -4308}, 
     {1738, -5151}, {1739, -4200}, {1740, -4200}, {1741, -5043}, 
     {1742, -5942}, {1743, -6848}, {1744, -6848}, {1745, -5996}, 
     {1746, -5996}, {1747, -6946}, {1748, -6946}, {1749, -7796}, 
     {1750, -7796}, {1751, -6951}, {1752, -6951}, {1753, -7867}, 
     {1754, -6962}, {1755, -6962}, {1756, -6962}, {1757, -6031}, 
     {1758, -6920}, {1759, -7819}, {1760, -7819}, {1761, -6932}, 
     {1762, -5940}, {1763, -5021}, {1764, -5021}, {1765, -4204}, 
     {1766, -3295}, {1767, -4132}, {1768, -4132}, {1769, -3260}, 
     {1770, -2346}, {1771, -3287}, {1772, -3287}, {1773, -3287}, 
     {1774, -2401}, {1775, -2401}, {1776, -2401}, {1777, -3231}, 
     {1778, -4163}, {1779, -3271}, {1780, -3271}, {1781, -2345}, 
     {1782, -2345}, {1783, -3249}, {1784, -3249}, {1785, -2376}, 
     {1786, -3304}, {1787, -4201}, {1788, -4201}, {1789, -5086}, 
     {1790, -5979}, {1791, -5979}, {1792, -5979}, {1793, -5128}, 
     {1794, -4176}, {1795, -3278}, {1796, -3278}, {1797, -2330}, 
     {1798, -3170}, {1799, -2271}, {1800, -2271}, {1801, -3183}, 
     {1802, -4079}, {1803, -3207}, {1804, -3207}, {1805, -3207}, 
     {1806, -2289}, {1807, -1358}, {1808, -1358}, {1809, -1358}, 
     {1810, -2241}, {1811, -3134}, {1812, -3134}, {1813, -3134}, 
     {1814, -2236}, {1815, -2236}, {1816, -2236}, {1817, -1320}, 
     {1818, -1320}, {1819, -397}, {1820, -397}, {1821, 513}, {1822, 1431}, 
     {1823, 493}, {1824, 493}, {1825, 493}, {1826, -440}, {1827, -440}, 
     {1828, -440}, {1829, 453}, {1830, 1413}, {1831, 537}, {1832, 537}, 
     {1833, -441}, {1834, -1347}, {1835, -428}, {1836, -428}, {1837, 496}, 
     {1838, 1407}, {1839, 2315}, {1840, 2315}, {1841, 3256}, {1842, 2365}, 
     {1843, 3288}, {1844, 3288}, {1845, 3288}, {1846, 2366}, {1847, 1417}, 
     {1848, 1417}, {1849, 1417}, {1850, 1417}, {1851, 2361}, {1852, 2361}, 
     {1853, 3266}, {1854, 3266}, {1855, 2277}, {1856, 2277}, {1857, 3195}, 
     {1858, 4110}, {1859, 4110}, {1860, 4110}, {1861, 3171}, {1862, 3171}, 
     {1863, 3171}, {1864, 3171}, {1865, 4144}, {1866, 3259}, {1867, 2315}, 
     {1868, 2315}, {1869, 1378}, {1870, 2295}, {1871, 1353}, {1872, 1353}, 
     {1873, 474}, {1874, 1410}, {1875, 1410}, {1876, 1410}, {1877, 430}, 
     {1878, -478}, {1879, -1490}, {1880, -1490}, {1881, -1490}, {1882, -546}, 
     {1883, 414}, {1884, 414}, {1885, -529}, {1886, -1561}, {1887, -2480}, 
     {1888, -2480}, {1889, -3462}, {1890, -3462}, {1891, -2497}, 
     {1892, -2497}, {1893, -1552}, {1894, -537}, {1895, 386}, {1896, 386}, 
     {1897, 1495}, {1898, 532}, {1899, 532}, {1900, 532}, {1901, -460}, 
     {1902, -1292}, {1903, -329}, {1904, -329}, {1905, -1250}, {1906, -303}, 
     {1907, -1269}, {1908, -1269}, {1909, -334}, {1910, -1292}, 
     {1911, -1292}, {1912, -1292}, {1913, -2232}, {1914, -1201}, 
     {1915, -341}, {1916, -341}, {1917, -341}, {1918, -1203}, {1919, -177}, 
     {1920, -177}, {1921, 799}, {1922, 799}, {1923, 1822}, {1924, 1822}, 
     {1925, 1822}, {1926, 1822}, {1927, 2677}, {1928, 2677}, {1929, 3615}, 
     {1930, 2682}, {1931, 1704}, {1932, 1704}, {1933, 722}, {1934, 1658}, 
     {1935, 1658}, {1936, 1658}, {1937, 2621}, {1938, 3638}, {1939, 4613}, 
     {1940, 4613}, {1941, 5562}, {1942, 6598}, {1943, 7568}, {1944, 7568}, 
     {1945, 8503}, {1946, 7550}, {1947, 6485}, {1948, 6485}, {1949, 5583}, 
     {1950, 5583}, {1951, 4625}, {1952, 4625}, {1953, 4625}, {1954, 5577}, 
     {1955, 4581}, {1956, 4581}, {1957, 5525}, {1958, 4463}, {1959, 5410}, 
     {1960, 5410}, {1961, 6429}, {1962, 6429}, {1963, 7423}, {1964, 7423}, 
     {1965, 6420}, {1966, 7404}, {1967, 8378}, {1968, 8378}, {1969, 9327}, 
     {1970, 8320}, {1971, 8320}, {1972, 8320}, {1973, 7318}, {1974, 8303}, 
     {1975, 8303}, {1976, 8303}, {1977, 9355}, {1978, 8421}, {1979, 7448}, 
     {1980, 7448}, {1981, 8405}, {1982, 9383}, {1983, 10424}, {1984, 10424}, 
     {1985, 11409}, {1986, 10350}, {1987, 9377}, {1988, 9377}, {1989, 9377}, 
     {1990, 8419}, {1991, 9405}, {1992, 9405}, {1993, 8409}, {1994, 9414}, 
     {1995, 10407}, {1996, 10407}, {1997, 9380}, {1998, 9380}, {1999, 8452}, 
     {2000, 8452}}
