# Supplementary material for: On Some Properties of the Hofstadter–Mertens Function
Source: Hindawi journal article supplement (doi:10.1155/2020/1816756), 2020-09-15
Supplement: f1 [file 1816756.f1.zip › Figure8.dat]

f8DAT = {{2, 1/Sqrt[2], 1/2, 1/2}, {5, Sqrt[53/10], -8/5, -2}, 
     {8, Sqrt[415/14]/2, -21/8, -2}, {11, 2*Sqrt[2], -3, -2}, 
     {14, Sqrt[2777/182], -59/14, -11/2}, {17, Sqrt[2753/34]/2, -57/17, -5}, 
     {20, Sqrt[13171/95]/2, -97/20, -6}, {23, Sqrt[9122/253], -100/23, -5}, 
     {26, Sqrt[25133/26]/5, -101/26, -5}, {29, Sqrt[18715/406], -90/29, -5}, 
     {32, Sqrt[145903/62]/4, -199/32, -5}, {35, Sqrt[94517/595], -216/35, 
      -5}, {38, Sqrt[240653/1406], -189/38, -5}, {41, Sqrt[208111/205]/2, 
      -98/41, -5}, {44, Sqrt[130253/473], -85/22, -5}, 
     {47, Sqrt[314053/1081], -242/47, -5}, {50, (4*Sqrt[24058])/35, -169/25, 
      -6}, {53, Sqrt[421111/1378], -370/53, -6}, {56, Sqrt[46183/154], 
      -197/28, -11/2}, {59, 3*Sqrt[79849/1711], -264/59, -5}, 
     {62, 3*Sqrt[92810/1891], -100/31, -5}, {65, Sqrt[1089563/130]/4, -73/65, 
      -5}, {68, 22*Sqrt[71/67], -1, -5}, {71, Sqrt[1333477/2485], -98/71, 
      -5}, {74, 3*Sqrt[403421/5402], -283/74, -5}, {77, Sqrt[2042151/2926], 
      -388/77, -5}, {80, Sqrt[5442279/395]/4, -611/80, -6}, 
     {83, 4*Sqrt[212345/3403], -832/83, -6}, {86, Sqrt[1532617/1462], 
      -963/86, -6}, {89, Sqrt[2138091/1958], -865/89, -6}, 
     {92, (3*Sqrt[1054699/2093])/2, -763/92, -11/2}, 
     {95, Sqrt[1681017/893], -65/19, -5}, {98, Sqrt[524405/194], 25/14, -5}, 
     {101, Sqrt[16006381/202]/5, 586/101, -5}, {104, Sqrt[33191447/2678]/2, 
      631/104, -4}, {107, Sqrt[17603090/5671], 492/107, -5}, 
     {110, 3*Sqrt[2338638/5995], 62/55, -5}, {113, Sqrt[24796169/1582]/2, 
      -282/113, -5}, {116, Sqrt[15727861/3335], -423/58, -11/2}, 
     {119, Sqrt[34267819/7021], -1146/119, -6}, {122, (21*Sqrt[79994/61])/11, 
      -598/61, -6}, {125, (3*Sqrt[2095606/155])/5, -947/125, -6}, 
     {128, (3*Sqrt[2178183/254])/4, -417/64, -5}, {131, Sqrt[8155077/1703], 
      -809/131, -5}, {134, Sqrt[84967629/17822], -767/134, -5}, 
     {137, Sqrt[44596139/2329]/2, -580/137, -5}, {140, 2*Sqrt[854827/695], 
      -32/5, -5}, {143, 3*Sqrt[5529019/10153], -849/143, -5}, 
     {146, Sqrt[57845342/10585], -178/73, -5}, {149, 3*Sqrt[7727543/11026], 
      284/149, -5}, {152, 9*Sqrt[455831/5738], 307/76, -3}, 
     {155, 26*Sqrt[112877/11935], 789/155, -2}, {158, 3*Sqrt[17506469/24806], 
      961/158, -2}, {161, (9*Sqrt[547417/1610])/2, 1532/161, -2}, 
     {164, (3*Sqrt[21888795/6683])/2, 2099/164, -1/2}, 
     {167, Sqrt[102546363/13861], 2397/167, 0}, {170, Sqrt[104976698/85]/13, 
      1259/85, 0}, {173, Sqrt[108208715/14878], 2380/173, 0}, 
     {176, Sqrt[15187834/77]/5, 112/11, -3/2}, {179, Sqrt[125960833/15931], 
      1570/179, -2}, {182, 2*Sqrt[35322762/16471], 486/91, -2}, 
     {185, (319*Sqrt[1497/4255])/2, 469/185, -3}, {188, Sqrt[80393505/8789], 
      29/94, -4}, {191, Sqrt[176541099/18145], -545/191, -5}, 
     {194, 26*Sqrt[306741/18721], -742/97, -5}, 
     {197, (29*Sqrt[154311/197])/7, -2732/197, -5}, 
     {200, (2*Sqrt[21735993/199])/5, -546/25, -11/2}, 
     {203, Sqrt[390709826/20503], -5466/203, -6}, 
     {206, 2*Sqrt[101086574/21115], -2973/103, -6}, 
     {209, Sqrt[102776705/5434], -5991/209, -6}, {212, Sqrt[211060195/11183], 
      -2865/106, -6}, {215, Sqrt[458310313/23005], -4923/215, -6}, 
     {218, Sqrt[1104515313/47306], -3455/218, -5}, 
     {221, Sqrt[375572661/12155], -1213/221, -5}, 
     {224, Sqrt[447469111/3122]/2, 333/112, -5}, 
     {227, 3*Sqrt[115199023/25651], 2533/227, -5}, 
     {230, 3*Sqrt[249934709/52670], 3937/230, -3}, 
     {233, 3*Sqrt[31966838/6757], 4507/233, -2}, 
     {236, (3*Sqrt[261951571/13865])/2, 5113/236, -2}, 
     {239, Sqrt[1215743930/28441], 5865/239, -2}, 
     {242, (2*Sqrt[308133005/241])/11, 2997/121, -1}, 
     {245, Sqrt[624026191/305]/7, 5991/245, -1}, 
     {248, Sqrt[2532669511/15314]/2, 5855/248, -1}, 
     {251, Sqrt[51359609/1255], 6077/251, -1}, {254, Sqrt[1308989698/32131], 
      3238/127, -1}, {257, Sqrt[1328691711/514]/8, 6795/257, -1}, 
     {260, 6*Sqrt[1440517/1295], 127/5, -1}, {263, Sqrt[1365540783/34453], 
      6663/263, -1}, {266, Sqrt[39510834/1007], 482/19, -1}, 
     {269, Sqrt[1401696433/36046], 6987/269, -1}, 
     {272, (5*Sqrt[28531031/4607])/2, 3327/136, -3/2}, 
     {275, (3*Sqrt[162870942/1507])/5, 6038/275, -2}, 
     {278, Sqrt[1504295070/38503], 2718/139, -2}, {281, Sqrt[385569971/9835], 
      4844/281, -3}, {284, 3*Sqrt[93896659/20093], 1617/142, -4}, 
     {287, Sqrt[1991384751/41041], 830/287, -5}, {290, Sqrt[271302097/4930], 
      -1631/290, -5}, {293, Sqrt[1306708694/21389], -4062/293, -5}, 
     {296, Sqrt[5825104183/21830]/2, -6455/296, -5}, 
     {299, Sqrt[3091564721/44551], -8218/299, -5}, {302, 4*Sqrt[186747/43], 
      -30, -6}, {305, Sqrt[399691951/5795], -8818/305, -5}, 
     {308, 2*Sqrt[57795115/3377], -307/11, -5}, {311, Sqrt[655413595/9641], 
      -8530/311, -5}, {314, Sqrt[6646177961/98282], -9087/314, -5}, 
     {317, 44*Sqrt[869849/25043], -9622/317, -6}, 
     {320, Sqrt[1380525931/319]/8, -2135/64, -6}, 
     {323, Sqrt[3497080249/52003], -11222/323, -6}, 
     {326, (2*Sqrt[883325101/2119])/5, -5719/163, -6}, 
     {329, Sqrt[1805513489/26978], -10664/329, -6}, 
     {332, Sqrt[7495505531/27473]/2, -9407/332, -6}, 
     {335, Sqrt[789801231/11189], -1561/67, -5}, 
     {338, Sqrt[8352835973/674]/13, -6037/338, -5}, 
     {341, Sqrt[4523697457/57970], -3757/341, -5}, 
     {344, Sqrt[9931887383/602]/14, -1129/344, -5}, 
     {347, 2*Sqrt[1327769371/60031], 1142/347, -5}, 
     {350, (2383*Sqrt[1949/4886])/5, 2883/350, -4}, 
     {353, Sqrt[5693576947/3883]/4, 4272/353, -3}, 
     {356, Sqrt[11573551371/31595]/2, 5141/356, -2}, 
     {359, Sqrt[5865822827/64261], 5850/359, -2}, 
     {362, Sqrt[11891910193/362]/19, 6571/362, -3/2}, 
     {365, Sqrt[6089513133/66430], 7847/365, -1}, 
     {368, (9*Sqrt[152332607/8441])/4, 8561/368, -1}, 
     {371, 2*Sqrt[1557118527/68635], 8896/371, -1}, 
     {374, 9*Sqrt[155393785/139502], 8843/374, -1}, 
     {377, Sqrt[6364548821/17719]/2, 8406/377, -1}, 
     {380, Sqrt[2574429047/7201]/2, 1593/76, -3/2}, 
     {383, Sqrt[6491919422/73153], 8100/383, -2}, 
     {386, Sqrt[13098246289/148610], 7975/386, -2}, 
     {389, Sqrt[3303052617/37733], 7919/389, -2}, 
     {392, Sqrt[13357526439/782]/14, 8495/392, -1}, 
     {395, Sqrt[6990130277/77815], 10496/395, -1}, 
     {398, Sqrt[7360088930/79003], 6375/199, -1}, 
     {401, Sqrt[1892579327/802]/5, 14350/401, -1}, 
     {404, Sqrt[15385879243/40703]/2, 15407/404, 0}, 
     {407, 2*Sqrt[1955233531/82621], 16504/407, 0}, 
     {410, Sqrt[7920431642/83845], 8613/205, 1}, 
     {413, 2*Sqrt[143345233/6077], 2594/59, 2}, 
     {416, Sqrt[4138295503/10790]/2, 9961/208, 2}, 
     {419, Sqrt[8588682865/87571], 21899/419, 2}, 
     {422, Sqrt[17434046021/177662], 22989/422, 3}, 
     {425, Sqrt[4431782981/1802]/5, 24249/425, 4}, 
     {428, Sqrt[17955702851/45689]/2, 25221/428, 5}, 
     {431, 31*Sqrt[1886894/18533], 25139/431, 5}, 
     {434, Sqrt[9306470998/93961], 11912/217, 4}, 
     {437, Sqrt[9874255867/95266], 21368/437, 2}, 
     {440, 2*Sqrt[670763482/24145], 4559/110, 2}, 
     {443, 3*Sqrt[1342191269/97903], 14226/443, 2}, 
     {446, Sqrt[13405756498/99235], 5128/223, 3/2}, 
     {449, Sqrt[14119756755/6286]/4, 7444/449, 1}, 
     {452, 9*Sqrt[91385170/50963], 1177/113, 0}, 
     {455, 9*Sqrt[186291458/103285], 3197/455, 0}, 
     {458, 4*Sqrt[968412839/104653], 618/229, -1}, 
     {461, 63*Sqrt[4009531/106030], -767/461, -1}, 
     {464, (3*Sqrt[912673103/13427])/2, -1529/232, -1}, 
     {467, 3*Sqrt[1913585221/108811], -6041/467, -1}, 
     {470, 9*Sqrt[222268822/110215], -4498/235, -2}, 
     {473, (3*Sqrt[2054221093/27907])/2, -11196/473, -2}, 
     {476, Sqrt[38076765459/2261]/10, -13611/476, -5/2}, 
     {479, 2*Sqrt[4876366238/114481], -15760/479, -3}, 
     {482, Sqrt[3053264401/17834], -17397/482, -5}, 
     {485, Sqrt[20092694277/970]/11, -18674/485, -5}, 
     {488, Sqrt[40633398663/59414]/2, -19849/488, -5}, 
     {491, Sqrt[20501043749/2455]/7, -20754/491, -5}, 
     {494, Sqrt[20713952486/121771], -10927/247, -5}, 
     {497, Sqrt[20920628573/30814]/2, -22916/497, -6}, 
     {500, (6*Sqrt[295723779/2495])/5, -6183/125, -6}, 
     {503, Sqrt[21498184509/126253], -25784/503, -6}, 
     {506, 6*Sqrt[602470383/127765], -13360/253, -6}, 
     {509, Sqrt[21955209541/129286], -28108/509, -6}, 
     {512, Sqrt[11055153615/1022]/8, -14343/256, -6}, 
     {515, Sqrt[4462318339/26471], -5641/103, -6}, 
     {518, Sqrt[45439671261/267806], -26611/518, -6}, 
     {521, 29*Sqrt[2762391/13546], -24700/521, -6}, 
     {524, Sqrt[46950607027/68513]/2, -23763/524, -6}, 
     {527, Sqrt[23892861221/138601], -22231/527, -6}, 
     {530, (2*Sqrt[1223583305/53])/23, -2015/53, -11/2}, 
     {533, Sqrt[304165558/1729], -448/13, -5}, {536, Sqrt[6378809782/35845], 
      -4073/134, -5}, {539, (2*Sqrt[6743059651/2959])/7, -12566/539, -5}, 
     {542, Sqrt[56804259517/293222], -8883/542, -5}, 
     {545, Sqrt[1927973577/9265], -3916/545, -5}, 
     {548, Sqrt[67995368547/74939]/2, 1775/548, -3}, 
     {551, Sqrt[37125140153/6061]/5, 7446/551, -2}, 
     {554, Sqrt[11967933315/43766], 14501/554, -2}, 
     {557, Sqrt[46182007545/154846], 21203/557, -2}, 
     {560, Sqrt[100585296719/19565]/4, 27759/560, -1}, 
     {563, Sqrt[53883726349/158203], 33860/563, -1}, 
     {566, 2*Sqrt[14516009022/159895], 20222/283, -1}, 
     {569, (3*Sqrt[6995846857/40399])/2, 47623/569, -1}, 
     {572, Sqrt[33730290266/81653], 13622/143, 0}, 
     {575, 6*Sqrt[79969731/6601], 12273/115, 0}, 
     {578, Sqrt[150891810653/1154]/17, 67355/578, 1}, 
     {581, Sqrt[79950013503/168490], 74227/581, 2}, 
     {584, Sqrt[42398313095/85118], 40681/292, 2}, 
     {587, 2*Sqrt[22655085346/171991], 89208/587, 2}, 
     {590, Sqrt[193194411549/347510], 97159/590, 3}, 
     {593, Sqrt[51515667259/21941]/2, 105417/593, 4}, 
     {596, Sqrt[12686720891/5215]/2, 112521/596, 5}, 
     {599, Sqrt[112338819839/179101], 119361/599, 7}, 
     {602, 6*Sqrt[3193336730/180901], 62219/301, 9}, 
     {605, (21*Sqrt[52973215/302])/11, 25724/121, 9}, 
     {608, 10*Sqrt[3876189/607], 216, 12}, {611, 3*Sqrt[13163407719/186355], 
      132550/611, 14}, {614, Sqrt[238213109869/376382], 133771/614, 15}, 
     {617, Sqrt[119719446761/47509]/2, 134116/617, 15}, 
     {620, 19*Sqrt[167545579/95945], 66131/310, 29/2}, 
     {623, 3*Sqrt[1936130321/27679], 18719/89, 13}, 
     {626, Sqrt[245241246529/626]/25, 131065/626, 12}, 
     {629, Sqrt[61632691345/98753], 131113/629, 11}, 
     {632, Sqrt[247828402335/99698]/2, 131141/632, 10}, 
     {635, Sqrt[124668907917/201295], 132729/635, 13}, 
     {638, (38*Sqrt[86953793/4147])/7, 67495/319, 29/2}, 
     {641, Sqrt[63111366367/6410]/4, 136288/641, 15}, 
     {644, Sqrt[9079996238/14789], 4832/23, 29/2}, 
     {647, 3*Sqrt[14381931046/208981], 131997/647, 13}, 
     {650, Sqrt[264014206369/16874]/5, 128359/650, 10}, 
     {653, Sqrt[135653714081/212878], 123677/653, 9}, 
     {656, (3*Sqrt[31232606007/26855])/4, 117999/656, 8}, 
     {659, Sqrt[146417431011/216811], 111670/659, 5}, 
     {662, Sqrt[308848887241/437582], 104017/662, 9/2}, 
     {665, 2*Sqrt[10272402083/55195], 95352/665, 4}, 
     {668, Sqrt[348515466131/111389]/2, 86705/668, 2}, 
     {671, Sqrt[2987865077/3685], 1296/11, 2}, 
     {674, Sqrt[380581292141/453602], 71391/674, 2}, 
     {677, Sqrt[99171293387/677]/13, 63714/677, 1}, 
     {680, Sqrt[104163685151/115430], 27513/340, 1/2}, 
     {683, Sqrt[217735024857/232903], 46656/683, 0}, 
     {686, (2*Sqrt[56943399719/4795])/7, 18971/343, -1/2}, 
     {689, Sqrt[117313844131/29627]/2, 30967/689, -1}, 
     {692, (5*Sqrt[19192332547/119543])/2, 25035/692, -1}, 
     {695, Sqrt[244320274183/241165], 19802/695, -1}, 
     {698, Sqrt[493320052685/486506], 16669/698, -3/2}, 
     {701, Sqrt[123993030131/4907]/5, 15315/701, -2}, 
     {704, Sqrt[498619759703/7733]/8, 13971/704, -2}, 
     {707, Sqrt[35798116351/35653], 1858/101, -2}, 
     {710, 3*Sqrt[55969292289/503390], 12047/710, -5/2}, 
     {713, Sqrt[126653344323/126914], 10378/713, -3}, 
     {716, Sqrt[127224949911/127985], 4897/358, -4}, 
     {719, Sqrt[255572467053/258121], 10289/719, -3}, 
     {722, (2*Sqrt[64188686510/721])/19, 5582/361, -2}, 
     {725, (2*Sqrt[32306002471/5249])/5, 13492/725, -2}, 
     {728, Sqrt[129919152691/132314], 7547/364, -3/2}, 
     {731, Sqrt[261017443411/266815], 15947/731, -1}, 
     {734, Sqrt[715395741/734], 16775/734, -1}, 
     {737, (3*Sqrt[29285953013/16951])/4, 18343/737, -1}, 
     {740, Sqrt[529910889731/136715]/2, 19913/740, -1/2}, 
     {743, Sqrt[266292039642/275653], 18862/743, -1}, 
     {746, 2*Sqrt[66907300513/277885], 8907/373, -1}, 
     {749, 4*Sqrt[1199816681/20009], 2610/107, 0}, 
     {752, 2*Sqrt[8434030217/35297], 2339/94, 0}, 
     {755, 2*Sqrt[67767074653/284635], 19514/755, 1}, 
     {758, 4*Sqrt[17015564905/286903], 10160/379, 3/2}, 
     {761, 49*Sqrt[299639/761], 19992/761, 2}, 
     {764, 2*Sqrt[4907259407/20819], 4629/191, 1}, 
     {767, 2*Sqrt[68999682331/293761], 18576/767, 1}, 
     {770, Sqrt[55446691490/59213], 1963/77, 2}, 
     {773, Sqrt[279135888619/298378], 22182/773, 2}, 
     {776, (2*Sqrt[17537519491/3007])/5, 5997/194, 2}, 
     {779, 2*Sqrt[70562399813/303031], 25933/779, 4}, 
     {782, Sqrt[51797776147/55522], 29437/782, 9/2}, 
     {785, Sqrt[287476187267/1570]/14, 32891/785, 5}, 
     {788, Sqrt[578372455131/155039]/2, 35107/788, 8}, 
     {791, 2*Sqrt[72800216198/312445], 37823/791, 9}, 
     {794, 3*Sqrt[65496922109/629642], 42151/794, 10}, 
     {797, Sqrt[148805416093/158603], 45921/797, 13}, 
     {800, Sqrt[35528414743/94]/20, 51013/800, 14}, 
     {803, Sqrt[309136693881/322003], 57832/803, 14}, 
     {806, Sqrt[632830308657/648830], 64735/806, 15}, 
     {809, Sqrt[80735871490/81709], 71262/809, 15}, 
     {812, Sqrt[654069626531/164633]/2, 76117/812, 15}, 
     {815, Sqrt[331475924723/331705], 81248/815, 15}, 
     {818, 11*Sqrt[2797745682/334153], 44012/409, 35/2}, 
     {821, Sqrt[69390849409/67322], 95582/821, 18}, 
     {824, 2*Sqrt[21918316847/84769], 25037/206, 20}, 
     {827, Sqrt[353049918443/341551], 103134/827, 20}, 
     {830, Sqrt[70894977630/68807], 10370/83, 20}, 
     {833, Sqrt[355764711945/442]/28, 104324/833, 20}, 
     {836, Sqrt[714204685563/174515]/2, 104441/836, 21}, 
     {839, 3*Sqrt[39831664062/351541], 105425/839, 25}, 
     {842, Sqrt[719756667173/842]/29, 106455/842, 51/2}, 
     {845, Sqrt[72442934093/422]/13, 21915/169, 27}, 
     {848, Sqrt[729102014687/371]/44, 112695/848, 27}, 
     {851, (2*Sqrt[92161980763/14467])/5, 117508/851, 29}, 
     {854, 2*Sqrt[93084394966/364231], 60941/427, 30}, 
     {857, Sqrt[93590546413/91699], 124459/857, 31}, 
     {860, Sqrt[752084414659/184685]/2, 126381/860, 32}, 
     {863, Sqrt[377423428177/371953], 127026/863, 32}, 
     {866, Sqrt[75797245382/74909], 64148/433, 32}, 
     {869, Sqrt[54471793867/53878], 131295/869, 32}, 
     {872, Sqrt[774434793887/189878]/2, 137355/872, 33}, 
     {875, Sqrt[56075565226/2185]/5, 20433/125, 36}, 
     {878, 2*Sqrt[99212675954/385003], 74000/439, 38}, 
     {881, 2*Sqrt[12608565533/48455], 154478/881, 38}, 
     {884, 2*Sqrt[50939066507/195143], 39803/221, 39}, 
     {887, Sqrt[410040038110/392941], 162465/887, 41}, 
     {890, Sqrt[412512198002/395605], 82823/445, 43}, 
     {893, 2*Sqrt[51872735467/199139], 168830/893, 45}, 
     {896, (3*Sqrt[13267237569/1790])/8, 24649/128, 93/2}, 
     {899, Sqrt[421550050405/403651], 176820/899, 48}, 
     {902, Sqrt[427560999090/406351], 91459/451, 48}, 
     {905, Sqrt[215767329051/204530], 187589/905, 48}, 
     {908, Sqrt[217058719719/205889], 95455/454, 49}, 
     {911, Sqrt[87343190281/82901], 194235/911, 50}, 
     {914, Sqrt[40023979366/37931], 99214/457, 101/2}, 
     {917, 8*Sqrt[3471017462/209993], 203143/917, 57}, 
     {920, Sqrt[224191850479/211370], 103959/460, 127/2}, 
     {923, Sqrt[456354823542/425503], 215012/923, 68}, 
     {926, Sqrt[468412318582/17131]/5, 111987/463, 69}, 
     {929, Sqrt[30109797654/26941], 233429/929, 69}, 
     {932, (3*Sqrt[27583064851/4427])/7, 121705/466, 151/2}, 
     {935, Sqrt[103416632845/87329], 51046/187, 83}, 
     {938, Sqrt[1063549632165/878906], 265117/938, 83}, 
     {941, Sqrt[1159585143/941], 274528/941, 83}, 
     {944, Sqrt[1109732166047/55637]/4, 282569/944, 85}, 
     {947, Sqrt[562966745811/447931], 289712/947, 85}, 
     {950, Sqrt[570004628702/18031]/5, 148182/475, 85}, 
     {953, Sqrt[580192087513/113407]/2, 304547/953, 85}, 
     {956, Sqrt[59050784935/45649], 156391/478, 86}, 
     {959, 3*Sqrt[66876438891/459361], 321408/959, 86}, 
     {962, 3*Sqrt[4412816727/29822], 330987/962, 90}, 
     {965, Sqrt[314057180006/232565], 340124/965, 98}, 
     {968, (9*Sqrt[1988031230/967])/11, 43812/121, 215/2}, 
     {971, 2*Sqrt[162977534661/470935], 357437/971, 110}, 
     {974, 4*Sqrt[41220712919/473851], 182146/487, 113}, 
     {977, Sqrt[83651222209/59597], 372242/977, 117}, 
     {980, (9*Sqrt[16689916211/4895])/14, 378703/980, 239/2}, 
     {983, 13*Sqrt[4050669755/482653], 386156/983, 126}, 
     {986, Sqrt[693302607546/485605], 196833/493, 130}, 
     {989, Sqrt[699246723081/488566], 399651/989, 131}, 
     {992, Sqrt[352540897959/61442]/2, 202779/496, 134}, 
     {995, Sqrt[101637575861/70645], 411801/995, 146}, 
     {998, 8*Sqrt[11208478354/497503], 208861/499, 153}, 
     {1001, Sqrt[13145072137/91]/10, 38499/91, 153}, 
     {1004, Sqrt[363290303711/251753], 213807/502, 307/2}, 
     {1007, Sqrt[730846172215/506521], 432201/1007, 154}, 
     {1010, Sqrt[735163105858/509545], 218416/505, 158}, 
     {1013, Sqrt[738608529133/512578], 440768/1013, 160}, 
     {1016, Sqrt[370470044087/257810], 221311/508, 161}, 
     {1019, Sqrt[743272717574/518671], 444471/1019, 163}, 
     {1022, 4*Sqrt[46634053777/521731], 222108/511, 162}, 
     {1025, Sqrt[93997914071/41]/40, 440892/1025, 161}, 
     {1028, 4*Sqrt[23639884195/263939], 109648/257, 160}, 
     {1031, 3*Sqrt[16945059243/106193], 435300/1031, 156}, 
     {1034, 3*Sqrt[86111610458/534061], 214471/517, 154}, 
     {1037, Sqrt[395029286998/268583], 421599/1037, 153}, 
     {1040, Sqrt[404980830471/67535]/2, 206377/520, 153}, 
     {1043, 3*Sqrt[91334272613/543403], 406577/1043, 153}, 
     {1046, 3*Sqrt[184756378281/1093070], 401431/1046, 283/2}, 
     {1049, Sqrt[209432186403/137419], 397883/1049, 131}, 
     {1052, Sqrt[1696230059435/276413]/2, 392299/1052, 261/2}, 
     {1055, Sqrt[861100820287/555985], 385689/1055, 130}, 
     {1058, (40*Sqrt[543800119/1057])/23, 190373/529, 124}, 
     {1061, Sqrt[876250330999/562330], 377304/1061, 117}, 
     {1064, Sqrt[443448444379/282758], 185813/532, 116}, 
     {1067, 4*Sqrt[4351202374/43747], 363310/1067, 111}, 
     {1070, Sqrt[185392787546/114383], 35398/107, 110}, 
     {1073, Sqrt[476336005043/71891]/2, 343620/1073, 105}, 
     {1076, (2*Sqrt[122421154058/11567])/5, 83247/269, 94}, 
     {1079, 2*Sqrt[35649229639/83083], 324475/1079, 90}, 
     {1082, Sqrt[1009552197522/584821], 159293/541, 86}, 
     {1085, Sqrt[72738496258/42005], 44822/155, 86}, 
     {1088, Sqrt[2075422946231/18479]/8, 305085/1088, 85}, 
     {1091, 3*Sqrt[118422213587/594595], 294210/1091, 85}, 
     {1094, Sqrt[2207093462733/1195742], 281205/1094, 85}, 
     {1097, Sqrt[574672140589/300578], 266683/1097, 85}, 
     {1100, Sqrt[341518384637/1727]/10, 252129/1100, 83}, 
     {1103, Sqrt[1237744144894/607753], 238261/1103, 83}, 
     {1106, Sqrt[2601222094617/1222130], 220975/1106, 161/2}, 
     {1109, 19*Sqrt[1910439843/307193], 201393/1109, 73}, 
     {1112, Sqrt[2891443487079/308858]/2, 183545/1112, 69}, 
     {1115, Sqrt[1507436716157/621055], 166434/1115, 69}, 
     {1118, Sqrt[120774233202/48031], 5738/43, 66}, 
     {1121, Sqrt[42875943681/4130]/2, 6970/59, 63}, 
     {1124, 6*Sqrt[23292817294/315563], 29389/281, 54}, 
     {1127, Sqrt[35147624327/12949], 14736/161, 50}, 
     {1130, Sqrt[3548405178609/1275770], 87599/1130, 99/2}, 
     {1133, 3*Sqrt[102489066930/320639], 69143/1133, 49}, 
     {1136, Sqrt[760367659891/16117]/4, 52873/1136, 48}, 
     {1139, 2*Sqrt[483896050521/648091], 40582/1139, 48}, 
     {1142, 2*Sqrt[489062109314/651511], 15869/571, 48}, 
     {1145, 4*Sqrt[30781297333/163735], 25146/1145, 45}, 
     {1148, Sqrt[3965051846451/329189]/2, 19049/1148, 89/2}, 
     {1151, (3*Sqrt[221291163239/26473])/5, 14639/1151, 42}, 
     {1154, 2*Sqrt[500984758714/665281], 4319/577, 81/2}, 
     {1157, (2*Sqrt[251391805414/1157])/17, 5543/1157, 38}, 
     {1160, 8*Sqrt[1576365351/33611], 75/29, 38}, 
     {1163, 2*Sqrt[506555718659/675703], -813/1163, 38}, 
     {1166, 2*Sqrt[509124178099/679195], -2928/583, 35}, 
     {1169, Sqrt[2043750824953/170674]/2, -8986/1169, 32}, 
     {1172, 2*Sqrt[256375699845/343103], -3029/293, 32}, 
     {1175, Sqrt[2060007833883/27589]/5, -16447/1175, 32}, 
     {1178, Sqrt[2067405848234/693253], -9844/589, 63/2}, 
     {1181, 2*Sqrt[259584729042/348395], -24181/1181, 30}, 
     {1184, (3*Sqrt[66444540145/74])/52, -31735/1184, 59/2}, 
     {1187, Sqrt[2113708426523/703891], -40614/1187, 27}, 
     {1190, Sqrt[4261059307889/1414910], -48201/1190, 27}, 
     {1193, Sqrt[534961416806/177757], -52709/1193, 26}, 
     {1196, Sqrt[4306121296747/357305]/2, -59063/1196, 25}, 
     {1199, Sqrt[2161760461862/718201], -62989/1199, 22}, 
     {1202, Sqrt[4337243526273/1443602], -65697/1202, 20}, 
     {1205, Sqrt[155302884637/51815], -65368/1205, 20}, 
     {1208, (5*Sqrt[174515685223/364514])/2, -62653/1208, 21}, 
     {1211, (2*Sqrt[109398400087/1211])/11, -60612/1211, 25}, 
     {1214, 6*Sqrt[60972626366/736291], -29029/607, 51/2}, 
     {1217, Sqrt[2202029682035/46246]/4, -55537/1217, 27}, 
     {1220, Sqrt[192320170517/16165]/2, -51187/1220, 27}, 
     {1223, Sqrt[2217999984203/747253], -49885/1223, 27}, 
     {1226, Sqrt[4447203901297/1226]/35, -49807/1226, 27}, 
     {1229, 25*Sqrt[1784455086/377303], -47360/1229, 29}, 
     {1232, (3*Sqrt[124266502895/94787])/2, -22863/616, 30}, 
     {1235, 2*Sqrt[43136051474/58615], -3386/95, 31}, 
     {1238, Sqrt[4497512369969/1531406], -43533/1238, 63/2}, 
     {1241, Sqrt[1127187477817/384710], -43790/1241, 31}, 
     {1244, Sqrt[4522181110987/386573]/2, -41575/1244, 32}, 
     {1247, Sqrt[323820430613/110983], -41294/1247, 32}, 
     {1250, Sqrt[4544776668529/2498]/25, -41689/1250, 32}, 
     {1253, Sqrt[325433086061/112054], -6013/179, 32}, 
     {1256, 2*Sqrt[142941739603/197035], -4768/157, 32}, 
     {1259, Sqrt[62095365321/21403], -33605/1259, 32}, 
     {1262, 6*Sqrt[64103507015/795691], -14594/631, 33}, 
     {1265, (3*Sqrt[258410649773/199870])/2, -21606/1265, 36}, 
     {1268, 11*Sqrt[9660884322/401639], -4020/317, 38}, 
     {1271, 2*Sqrt[587467239382/807085], -10685/1271, 38}, 
     {1274, Sqrt[4733344647685/33098]/7, -3481/1274, 39}, 
     {1277, Sqrt[2383521758903/814726], 3741/1277, 41}, 
     {1280, (3*Sqrt[531969942911/6395])/16, 8381/1280, 43}, 
     {1283, Sqrt[2401264396697/822403], 11153/1283, 45}, 
     {1286, Sqrt[4822332436141/1652510], 15365/1286, 93/2}, 
     {1289, Sqrt[2423371005119/207529]/2, 20870/1289, 48}, 
     {1292, 2*Sqrt[304276853931/416993], 6438/323, 48}, 
     {1295, Sqrt[2449725202487/837865], 32514/1295, 48}, 
     {1298, 2*Sqrt[614889161474/841753], 18338/649, 49}, 
     {1301, Sqrt[2467987126067/33826]/5, 40201/1301, 50}, 
     {1304, 4*Sqrt[38681076703/212389], 10779/326, 101/2}, 
     {1307, Sqrt[2483181405626/853471], 46022/1307, 57}, 
     {1310, 2*Sqrt[88908778819/122485], 23153/655, 60}, 
     {1313, Sqrt[192114149489/4141]/4, 3329/101, 51}, 
     {1316, Sqrt[1251717922909/432635], 21461/658, 54}, 
     {1319, Sqrt[2511283099934/869221], 46001/1319, 63}, 
     {1322, 44*Sqrt[1300516721/873181], 23888/661, 66}, 
     {1325, Sqrt[100985997071/35086], 10031/265, 69}, 
     {1328, Sqrt[5065064269231/110141]/4, 53263/1328, 69}, 
     {1331, (2*Sqrt[636389361061/7315])/11, 59051/1331, 73}, 
     {1334, Sqrt[2562334887578/889111], 33087/667, 161/2}, 
     {1337, 5*Sqrt[25738833189/223279], 71332/1337, 83}, 
     {1340, Sqrt[1293589756909/448565], 38611/670, 83}, 
     {1343, Sqrt[42630203958/14773], 83100/1343, 85}, 
     {1346, 6*Sqrt[72850785742/905185], 45837/673, 85}, 
     {1349, 2*Sqrt[333407760505/454613], 104993/1349, 85}, 
     {1352, Sqrt[682356039630/1351]/13, 30253/338, 85}, 
     {1355, 2*Sqrt[139840261179/183467], 27539/271, 86}, 
     {1358, 2*Sqrt[721363078686/921403], 78542/679, 86}, 
     {1361, 3*Sqrt[82305017853/231370], 175135/1361, 90}, 
     {1364, Sqrt[6050401328355/464783]/2, 191159/1364, 183/2}, 
     {1367, Sqrt[3114232724717/933661], 210590/1367, 98}, 
     {1370, Sqrt[1276657258749/274]/37, 45725/274, 106}, 
     {1373, Sqrt[1634285558914/9611]/7, 246600/1373, 107}, 
     {1376, Sqrt[415065072391/4730]/5, 65283/344, 110}, 
     {1379, Sqrt[3368286993907/950131], 274959/1379, 111}, 
     {1382, Sqrt[6831766542009/1908542], 288757/1382, 116}, 
     {1385, Sqrt[871814372097/239605], 306018/1385, 117}, 
     {1388, Sqrt[7163608482427/481289]/2, 326069/1388, 124}, 
     {1391, Sqrt[3696122568322/966745], 348215/1391, 130}, 
     {1394, 3*Sqrt[424977662202/970921], 185881/697, 261/2}, 
     {1397, Sqrt[1976745764362/487553], 395310/1397, 131}, 
     {1400, Sqrt[1160368625833/2798]/10, 59541/200, 283/2}, 
     {1403, Sqrt[4206162054673/983503], 441775/1403, 152}, 
     {1406, 32*Sqrt[4281370099/987715], 234791/703, 153}, 
     {1409, Sqrt[565054014737/30998]/2, 493838/1409, 153}, 
     {1412, Sqrt[2340343474514/498083], 130049/353, 307/2}, 
     {1415, 2*Sqrt[1210247669042/1000405], 546558/1415, 154}, 
     {1418, Sqrt[5037626947074/1004653], 287887/709, 158}, 
     {1421, (6*Sqrt[72688816493/10295])/7, 604994/1421, 160}, 
     {1424, Sqrt[2705644729495/126647]/2, 316389/712, 161}, 
     {1427, 19*Sqrt[669075091/44237], 657686/1427, 163}, 
     {1430, Sqrt[11337548640349/2043470], 679729/1430, 163}, 
     {1433, Sqrt[1445564968109/256507], 701776/1433, 163}, 
     {1436, Sqrt[2926094142606/515165], 179693/359, 165}, 
     {1439, Sqrt[5939302204299/1034641], 737933/1439, 168}, 
     {1442, Sqrt[6026080745922/1038961], 378527/721, 345/2}, 
     {1445, (3*Sqrt[135337119721/2])/323, 154655/289, 173}, 
     {1448, 4*Sqrt[95814703698/261907], 196467/362, 349/2}, 
     {1451, 2*Sqrt[308349664302/210395], 797022/1451, 176}, 
     {1454, 2*Sqrt[1548224456390/1056331], 402986/727, 176}, 
     {1457, 2*Sqrt[194254434007/132587], 814126/1457, 176}, 
     {1460, 2*Sqrt[155983282431/106507], 41113/73, 355/2}, 
     {1463, Sqrt[6260921126689/1069453], 829677/1463, 179}, 
     {1466, 3*Sqrt[139613281414/214769], 418560/733, 179}, 
     {1469, Sqrt[6314109579719/1078246], 847508/1469, 182}, 
     {1472, Sqrt[3172885205903/33833]/4, 428967/736, 183}, 
     {1475, (3*Sqrt[708621219898/43483])/5, 868394/1475, 190}, 
     {1478, 2*Sqrt[1604199489535/1091503], 440165/739, 387/2}, 
     {1481, Sqrt[3225919559459/547970], 891511/1481, 194}, 
     {1484, Sqrt[12967201627131/550193]/2, 901955/1484, 200}, 
     {1487, Sqrt[6515381420121/1104841], 912403/1487, 200}, 
     {1490, 8*Sqrt[20428684982/221861], 91986/149, 401/2}, 
     {1493, Sqrt[6550653745039/1113778], 922078/1493, 201}, 
     {1496, Sqrt[1641457980706/279565], 230323/374, 201}, 
     {1499, Sqrt[6582691795142/1122751], 919760/1499, 201}, 
     {1502, Sqrt[6599551731998/1127251], 459117/751, 401/2}, 
     {1505, Sqrt[330694015373/14147]/2, 183643/301, 201}, 
     {1508, Sqrt[13263088856915/568139]/2, 915959/1508, 200}, 
     {1511, Sqrt[6648343715647/1140805], 914479/1511, 200}, 
     {1514, Sqrt[13330276093617/2290682], 913011/1514, 200}, 
     {1517, Sqrt[3340120746999/574943], 912295/1517, 200}, 
     {1520, Sqrt[13387732809159/2945]/28, 915379/1520, 200}, 
     {1523, Sqrt[6708914724237/1159003], 919635/1523, 201}, 
     {1526, Sqrt[13445771858797/93086]/5, 922835/1526, 403/2}, 
     {1529, (5*Sqrt[269551925747/292039])/2, 927734/1529, 208}, 
     {1532, Sqrt[13509094930339/586373]/2, 932489/1532, 208}, 
     {1535, Sqrt[6768371203602/1177345], 933246/1535, 208}, 
     {1538, Sqrt[13567002989305/2363906], 937015/1538, 210}, 
     {1541, Sqrt[1360834519453/237314], 944074/1541, 215}, 
     {1544, Sqrt[13640618009479/595598]/2, 949081/1544, 219}, 
     {1547, 8*Sqrt[106779499315/1195831], 951318/1547, 222}, 
     {1550, Sqrt[6848355316882/48019]/5, 475647/775, 222}, 
     {1553, Sqrt[6870955265103/301282]/2, 947228/1553, 216}, 
     {1556, Sqrt[3443876664366/604895], 236380/389, 427/2}, 
     {1559, Sqrt[6908750802389/1214461], 942234/1559, 208}, 
     {1562, Sqrt[6934166780622/1219141], 468652/781, 208}, 
     {1565, Sqrt[6953075528613/1223830], 934613/1565, 208}, 
     {1568, Sqrt[3485976256479/3134]/14, 465967/784, 403/2}, 
     {1571, Sqrt[6991247302703/1233235], 929267/1571, 201}, 
     {1574, (2*Sqrt[1753474327626/10231])/11, 462585/787, 200}, 
     {1577, 20*Sqrt[4394342969/310669], 923404/1577, 200}, 
     {1580, Sqrt[705198304391/124741], 91989/158, 197}, 
     {1583, 16*Sqrt[27721262434/1252153], 910923/1583, 194}, 
     {1586, Sqrt[14306318523377/2513810], 899921/1586, 383/2}, 
     {1589, Sqrt[515118204929/90119], 126947/227, 184}, 
     {1592, Sqrt[14479375027751/633218]/2, 883015/1592, 182}, 
     {1595, 2*Sqrt[1815387297838/1271215], 879229/1595, 179}, 
     {1598, Sqrt[7295209348542/1276003], 436217/799, 179}, 
     {1601, Sqrt[920187253653/1601]/10, 860061/1601, 179}, 
     {1604, Sqrt[530443847301/91829], 423957/802, 176}, 
     {1607, Sqrt[7524712502853/1290421], 831828/1607, 176}, 
     {1610, 4*Sqrt[478550920763/1295245], 406209/805, 176}, 
     {1613, Sqrt[7789749615671/1300078], 792942/1613, 176}, 
     {1616, Sqrt[999477517118/163115], 47984/101, 173}, 
     {1619, 8*Sqrt[128177950511/1309771], 742446/1619, 173}, 
     {1622, Sqrt[16874473550565/2629262], 715379/1622, 170}, 
     {1625, (3*Sqrt[478943264721/26390])/5, 691763/1625, 167}, 
     {1628, Sqrt[17729698468963/662189]/2, 664053/1628, 163}, 
     {1631, Sqrt[1827113937233/265853], 634680/1631, 163}, 
     {1634, 11*Sqrt[77482888502/1334161], 303613/817, 163}, 
     {1637, Sqrt[9679808816071/1339066], 575887/1637, 161}, 
     {1640, 3*Sqrt[554721319831/671990], 272251/820, 321/2}, 
     {1643, Sqrt[10198680748049/1348903], 518839/1643, 160}, 
     {1646, 2*Sqrt[519328696163/270767], 247476/823, 155}, 
     {1649, Sqrt[10551117132907/339694]/2, 472851/1649, 154}, 
     {1652, 2*Sqrt[1334568345242/681863], 113520/413, 153}, 
     {1655, Sqrt[10794895963647/1368685], 436054/1655, 153}, 
     {1658, 2*Sqrt[2724596273563/1373653], 209721/829, 305/2}, 
     {1661, Sqrt[11008378047349/1378630], 402168/1661, 146}, 
     {1664, Sqrt[5571198191199/43238]/4, 191311/832, 134}, 
     {1667, Sqrt[1613475102702/198373], 361533/1667, 131}, 
     {1670, Sqrt[11499528940478/1393615], 168234/835, 130}, 
     {1673, Sqrt[2922944511653/349657], 312260/1673, 126}, 
     {1676, Sqrt[5933193979051/28073]/5, 144673/838, 239/2}, 
     {1679, 2*Sqrt[130932651491/61247], 11572/73, 117}, 
     {1682, Sqrt[12193161403282]/1189, 122713/841, 113}, 
     {1685, Sqrt[6165089467106/709385], 225629/1685, 110}, 
     {1688, 2*Sqrt[778361748994/355957], 51761/422, 217/2}, 
     {1691, Sqrt[2507709286649/1691]/13, 192531/1691, 107}, 
     {1694, Sqrt[12625930438782/11851]/11, 88862/847, 203/2}, 
     {1697, Sqrt[6377442431073/179882]/2, 158641/1697, 93}, 
     {1700, Sqrt[6478023239069/28883]/5, 66909/850, 90}, 
     {1703, Sqrt[573111612669/63011], 107340/1703, 86}, 
     {1706, Sqrt[13406598155114/1454365], 40447/853, 86}, 
     {1709, Sqrt[1942320480581/208498], 56902/1709, 85}, 
     {1712, Sqrt[6893767617231/183077]/2, 16393/856, 85}, 
     {1715, Sqrt[13915423923162/29995]/7, 13814/1715, 85}, 
     {1718, 2*Sqrt[3502779627977/1474903], -912/859, 85}, 
     {1721, Sqrt[7045673570413/740030], -15729/1721, 83}, 
     {1724, Sqrt[7089480230386/742613], -7634/431, 83}, 
     {1727, 2*Sqrt[3563552184773/1490401], -43699/1727, 83}, 
     {1730, Sqrt[2865962651842/299117], -5690/173, 151/2}, 
     {1733, 18*Sqrt[22237342565/750389], -70773/1733, 69}, 
     {1736, 6*Sqrt[14374359003/53785], -3021/62, 69}, 
     {1739, 9*Sqrt[179848095982/1511191], -98247/1739, 68}, 
     {1742, 2*Sqrt[3664874095547/1516411], -56716/871, 127/2}, 
     {1745, Sqrt[7397762968501/190205]/2, -133124/1745, 57}, 
     {1748, 2*Sqrt[1866736242482/763439], -38253/437, 101/2}, 
     {1751, Sqrt[3020911889693/12257]/5, -175555/1751, 50}, 
     {1754, Sqrt[30531124527981/3074762], -197335/1754, 49}, 
     {1757, 2*Sqrt[1925585370001/771323], -217290/1757, 48}, 
     {1760, 174*Sqrt[32153378/96745], -29981/220, 48}, 
     {1763, Sqrt[15693441327722/1553203], -257741/1763, 48}, 
     {1766, Sqrt[31528701191741/3116990], -270261/1766, 93/2}, 
     {1769, 2*Sqrt[76094300495/30073], -281785/1769, 45}, 
     {1772, Sqrt[4535997654389/112079]/2, -290705/1772, 43}, 
     {1775, Sqrt[15920378588157/62977]/5, -298794/1775, 41}, 
     {1778, Sqrt[31948398867937/3159506], -308589/1778, 39}, 
     {1781, 2*Sqrt[2002800441327/792545], -317476/1781, 38}, 
     {1784, (3*Sqrt[3571192845391/795218])/2, -326319/1784, 38}, 
     {1787, 3*Sqrt[1791641681142/1595791], -336200/1787, 36}, 
     {1790, 2*Sqrt[4054408169423/1601155], -175733/895, 33}, 
     {1793, Sqrt[8163218566113/12551]/8, -368552/1793, 32}, 
     {1796, 10*Sqrt[16384813570/161191], -94821/449, 32}, 
     {1799, Sqrt[16427886348649/1617301], -387055/1799, 32}, 
     {1802, 4*Sqrt[1030027339861/1622701], -198294/901, 61/2}, 
     {1805, Sqrt[16531989644647/4510]/19, -406209/1805, 30}, 
     {1808, Sqrt[8282814467039/204191]/2, -205607/904, 28}, 
     {1811, Sqrt[16605576236343/1638955], -417947/1811, 27}, 
     {1814, Sqrt[33303980295141/67118]/7, -426451/1814, 53/2}, 
     {1817, Sqrt[8343930146129/824918], -432243/1817, 25}, 
     {1820, Sqrt[4776149670173/118235]/2, -62051/260, 47/2}, 
     {1823, Sqrt[16747617559583/1660753], -431920/1823, 25}, 
     {1826, Sqrt[16776187837682/66649]/5, -215687/913, 51/2}, 
     {1829, 2*Sqrt[2100532545245/835853], -431801/1829, 25}, 
     {1832, Sqrt[8417702125199/838598], -214657/916, 53/2}, 
     {1835, Sqrt[3372836293165/336539], -86306/367, 25}, 
     {1838, Sqrt[33789507415577/3376406], -430055/1838, 51/2}, 
     {1841, Sqrt[8472732889101/211715]/2, -422169/1841, 27}, 
     {1844, Sqrt[8501025719362/849623], -103307/461, 27}, 
     {1847, 5*Sqrt[681990231430/1704781], -406157/1847, 29}, 
     {1850, (2*Sqrt[4271218086883/37])/215, -200953/925, 30}, 
     {1853, Sqrt[8568049501118/857939], -393918/1853, 31}, 
     {1856, (3*Sqrt[954807742327/53795])/4, -193049/928, 32}, 
     {1859, (230*Sqrt[326269806/10219])/13, -374683/1859, 32}, 
     {1862, 5*Sqrt[28287265533/70718], -52033/266, 32}, 
     {1865, (3*Sqrt[386500067221/86909])/2, -70749/373, 34}, 
     {1868, 5*Sqrt[348865431698/871889], -86464/467, 37}, 
     {1871, 4*Sqrt[218519041757/349877], -340830/1871, 38}, 
     {1874, 11*Sqrt[289496419601/3510002], -337593/1874, 38}, 
     {1877, Sqrt[8773829952609/880313], -334343/1877, 40}, 
     {1880, (3*Sqrt[3906449334191/883130])/2, -337801/1880, 38}, 
     {1883, 3*Sqrt[279510281279/253129], -48489/269, 38}, 
     {1886, 3*Sqrt[3919877221697/3555110], -341099/1886, 38}, 
     {1889, Sqrt[17687628696313/111451]/4, -349521/1889, 38}, 
     {1892, Sqrt[35471919466451/894443]/2, -357977/1892, 35}, 
     {1895, Sqrt[3553253890653/358913], -71936/379, 34}, 
     {1898, Sqrt[35595787798453/3600506], -357267/1898, 37}, 
     {1901, Sqrt[17827081084779/72238]/5, -356663/1901, 38}, 
     {1904, (3*Sqrt[3968091669247/226457])/4, -358613/1904, 35}, 
     {1907, 2*Sqrt[4471686451522/1817371], -361435/1907, 32}, 
     {1910, Sqrt[3583435031094/364619], -36433/191, 32}, 
     {1913, Sqrt[8975806882543/914414], -369146/1913, 32}, 
     {1916, Sqrt[35961560777083/917285]/2, -371029/1916, 63/2}, 
     {1919, Sqrt[18009931991651/1840321], -372750/1919, 30}, 
     {1922, Sqrt[2122350772001/226]/31, -371329/1922, 61/2}, 
     {1925, Sqrt[9039923822914/37037]/5, -365863/1925, 32}, 
     {1928, Sqrt[771393399065/19762]/2, -358687/1928, 32}, 
     {1931, Sqrt[18181255666046/1863415], -350686/1931, 32}, 
     {1934, Sqrt[18216991569702/1869211], -173301/967, 33}, 
     {1937, Sqrt[351141555543/298]/11, -26205/149, 36}, 
     {1940, Sqrt[5241757409517/134345]/2, -327801/1940, 38}, 
     {1943, 4*Sqrt[1156804123718/1886653], -308073/1943, 38}, 
     {1946, 2*Sqrt[668787698379/270355], -20318/139, 39}, 
     {1949, Sqrt[18872432478421/1898326], -265899/1949, 41}, 
     {1952, Sqrt[9488773341959/238022]/2, -125533/976, 43}, 
     {1955, Sqrt[1122481735799/112355], -13899/115, 45}, 
     {1958, Sqrt[19184780290366/1915903], -110857/979, 93/2}, 
     {1961, Sqrt[4828952198519/9805]/7, -204465/1961, 48}, 
     {1964, Sqrt[9749160338971/963833], -91595/982, 48}, 
     {1967, 2*Sqrt[4923858594126/1933561], -160988/1967, 48}, 
     {1970, Sqrt[3627700748051/352630], -134963/1970, 49}, 
     {1973, Sqrt[10087552340941/972689], -111005/1973, 50}, 
     {1976, (2*Sqrt[1275786451997/19513])/5, -10762/247, 101/2}, 
     {1979, Sqrt[20657089182613/1957231], -60872/1979, 57}, 
     {1982, 4*Sqrt[1306365885355/1963171], -17818/991, 127/2}, 
     {1985, Sqrt[664968768621/61535], -3379/1985, 68}, 
     {1988, Sqrt[6169176002741/141077]/2, 3675/284, 69}, 
     {1991, 3*Sqrt[2429975503261/1981045], 52926/1991, 69}, 
     {1994, 3*Sqrt[2460885353566/1987021], 40077/997, 151/2}, 
     {1997, Sqrt[22482557728877/1993006], 110348/1997, 83}, 
     {2000, Sqrt[2842994071286/9995]/5, 17079/250, 83}, 
     {2003, Sqrt[22956433503155/2005003], 159922/2003, 83}, 
     {2006, 6*Sqrt[128711077545/402203], 91578/1003, 85}, 
     {2009, Sqrt[23363329885311/10291]/14, 205353/2009, 85}, 
     {2012, Sqrt[47156866849419/1011533]/2, 228819/2012, 85}, 
     {2015, 2*Sqrt[455804906766/156085], 18862/155, 85}, 
     {2018, 28*Sqrt[30342182354/2035153], 128912/1009, 86}, 
     {2021, Sqrt[4785576792883/408242], 275748/2021, 86}, 
     {2024, (13*Sqrt[284699039503/3542])/34, 292833/2024, 90}, 
     {2027, Sqrt[24198713081295/2053351], 310936/2027, 93}, 
     {2030, Sqrt[239584355387/20290], 1611/10, 203/2}, 
     {2033, Sqrt[24500996434443/516382]/2, 348323/2033, 107}, 
     {2036, Sqrt[49373639629467/1035815]/2, 369809/2036, 217/2}, 
     {2039, Sqrt[24831546652262/2077741], 388156/2039, 110}, 
     {2042, Sqrt[24999000438326/2083861], 204095/1021, 113}, 
     {2045, Sqrt[12613629443979/1044995], 432462/2045, 117}, 
     {2048, Sqrt[12793425578479/4094]/16, 231913/1024, 239/2}, 
     {2051, Sqrt[26066255405186/84091]/5, 500450/2051, 126}, 
     {2054, 2*Sqrt[6632405898567/2108431], 268182/1027, 130}, 
     {2057, (3*Sqrt[2984091393435/4369])/22, 566175/2057, 131}, 
     {2060, Sqrt[13613748888549/1060385], 299031/1030, 134}, 
     {2063, Sqrt[27642832817057/2126953], 631977/2063, 146}, 
     {2066, 31*Sqrt[29147134054/2133145], 331858/1033, 305/2}, 
     {2069, Sqrt[28315436807267/2139346], 692350/2069, 153}, 
     {2072, 10*Sqrt[71550211946/536389], 180241/518, 153}, 
     {2075, Sqrt[28965073459918/86071]/5, 751617/2075, 154}, 
     {2078, 3*Sqrt[6524217455029/4316006], 784497/2078, 155}, 
     {2081, Sqrt[29799359263967/135265]/4, 819493/2081, 160}, 
     {2084, Sqrt[60165605340827/1085243]/2, 846963/2084, 321/2}, 
     {2087, Sqrt[30250263040701/2176741], 866898/2087, 161}, 
     {2090, 4*Sqrt[1897830835103/2183005], 441201/1045, 163}, 
     {2093, Sqrt[30452085703583/2189278], 894714/2093, 163}, 
     {2096, Sqrt[61035133169671/274445]/4, 903763/2096, 163}, 
     {2099, Sqrt[30595283398234/2201851], 914811/2099, 167}, 
     {2102, Sqrt[61375766420689/4416302], 927673/2102, 170}, 
     {2105, 4*Sqrt[482168910803/553615], 947986/2105, 173}, 
     {2108, Sqrt[62118085207027/22661]/14, 970441/2108, 173}, 
     {2111, 7*Sqrt[636334709019/2227105], 986411/2111, 176}, 
     {2114, Sqrt[29578988077/2114], 995893/2114, 176}, 
     {2117, Sqrt[31307738229353/4234]/23, 1003238/2117, 176}, 
     {2120, Sqrt[15685781058859/1123070], 505961/1060, 176}, 
     {2123, 5*Sqrt[1257800867779/2252503], 1022016/2123, 179}, 
     {2126, Sqrt[63099778215401/180710]/5, 1036447/2126, 179}, 
     {2129, Sqrt[3962798380726/283157], 1055307/2129, 179}, 
     {2132, Sqrt[63690136964035/1135823]/2, 1073349/2132, 182}, 
     {2135, Sqrt[6389241043879/455609], 217433/427, 184}, 
     {2138, 15*Sqrt[284573159329/4568906], 1096655/2138, 383/2}, 
     {2141, 3*Sqrt[356312845454/229087], 1102943/2141, 194}, 
     {2144, Sqrt[64228081275319/287162]/4, 1105075/2144, 197}, 
     {2147, Sqrt[32160504211145/2303731], 1108017/2147, 200}, 
     {2150, Sqrt[64428439161061/184814]/5, 1114233/2150, 200}, 
     {2153, Sqrt[32268057435215/579157]/2, 1120518/2153, 201}, 
     {2156, Sqrt[16157336196223/23705]/7, 561795/1078, 403/2}, 
     {2159, Sqrt[32368729529009/2329561], 1129948/2159, 208}, 
     {2162, 5*Sqrt[2593473523509/4672082], 1133999/2162, 208}, 
     {2165, 2*Sqrt[4058389238071/1171265], 1132723/2165, 208}, 
     {2168, (9*Sqrt[802808232023/1174514])/2, 1135737/2168, 208}, 
     {2171, Sqrt[32574109284527/2355535], 1143250/2171, 212}, 
     {2174, Sqrt[65356721293009/4724102], 1157331/2174, 431/2}, 
     {2177, Sqrt[16413815004411/74018]/4, 1175813/2177, 222}, 
     {2180, (3*Sqrt[7328038205491/1187555])/2, 1194231/2180, 224}, 
     {2183, Sqrt[33203247943837/2381653], 1218082/2183, 228}, 
     {2186, Sqrt[66929483564913/4776410], 1244065/2186, 230}, 
     {2189, Sqrt[33766698337355/2394766], 1272237/2189, 232}, 
     {2192, Sqrt[68474506724719/300167]/4, 1308049/2192, 235}, 
     {2195, Sqrt[34746081388787/2407915], 1345291/2195, 238}, 
     {2198, (8*Sqrt[551770941266/14287])/13, 692393/1099, 238}, 
     {2201, Sqrt[8984849000187/24211]/5, 1426355/2201, 240}, 
     {2204, Sqrt[72969540243571/1213853]/2, 1465057/2204, 240}, 
     {2207, 2*Sqrt[9257191158741/2434321], 1503704/2207, 240}, 
     {2210, Sqrt[75146599112361/2210]/47, 1542363/2210, 240}, 
     {2213, 6*Sqrt[75522123701/174827], 1578930/2213, 245}, 
     {2216, Sqrt[15418793418547/245422]/2, 1615267/2216, 491/2}, 
     {2219, Sqrt[39246726363631/2460871], 1659246/2219, 246}, 
     {2222, Sqrt[39944459756194/2467531], 851579/1111, 493/2}, 
     {2225, Sqrt[40544341102183/24742]/10, 1743853/2225, 248}, 
     {2228, Sqrt[20658161266871/1240439], 895079/1114, 249}, 
     {2231, Sqrt[42211543636194/2487565], 1840093/2231, 250}, 
     {2234, 6*Sqrt[1197222309467/2494261], 944917/1117, 505/2}, 
     {2237, Sqrt[3374816170537/192382], 1936153/2237, 254}, 
     {2240, Sqrt[3171937669993/11195]/4, 141031/160, 263}, 
     {2243, Sqrt[44828375919231/2514403], 2008075/2243, 264}, 
     {2246, Sqrt[90489634700497/5042270], 2041523/2246, 270}, 
     {2249, Sqrt[45681664873981/631969]/2, 2075917/2249, 272}, 
     {2252, Sqrt[92247775551979/1267313]/2, 2110545/2252, 273}, 
     {2255, Sqrt[46598230095393/51865]/7, 2146487/2255, 292}, 
     {2258, 36*Sqrt[36344478062/2548153], 1091769/1129, 299}, 
     {2261, 9*Sqrt[294203126181/1277465], 2222700/2261, 306}, 
     {2264, Sqrt[24155231219403/1280858], 1132533/1132, 621/2}, 
     {2267, 25*Sqrt[78086141643/2568511], 2301690/2267, 335}, 
     {2270, 2*Sqrt[12286093154702/2575315], 1165809/1135, 337}, 
     {2273, (3*Sqrt[5495537589401/161383])/4, 2360372/2273, 339}, 
     {2276, Sqrt[99349124144091/51779]/10, 2383349/2276, 340}, 
     {2279, Sqrt[49872734649489/2595781], 2405124/2279, 345}, 
     {2282, Sqrt[100085487241333/5205242], 2424633/2282, 351}, 
     {2285, 4*Sqrt[1569612877831/1304735], 2445444/2285, 352}, 
     {2288, Sqrt[100828401462751/327041]/4, 2466391/2288, 352}, 
     {2291, 8*Sqrt[157922485490/524639], 2481503/2291, 358}, 
     {2294, 4*Sqrt[3164856085426/2630071], 1247041/1147, 362}, 
     {2297, Sqrt[12678360642415/659239], 2502068/2297, 362}, 
     {2300, Sqrt[101559676191731/437]/110, 2504687/2300, 725/2}, 
     {2303, Sqrt[50848035531985/54097]/7, 2506452/2303, 363}, 
     {2306, 4*Sqrt[3182573381149/2657665], 1256448/1153, 363}, 
     {2309, Sqrt[51018585385399/2664586], 2525020/2309, 370}, 
     {2312, Sqrt[25543126483727/4622]/17, 1264529/1156, 372}, 
     {2315, Sqrt[10230941322365/535691], 506122/463, 372}, 
     {2318, 7*Sqrt[902331661/2318], 2534493/2318, 749/2}, 
     {2321, Sqrt[25648300536693/336545]/2, 2542021/2321, 386}, 
     {2324, Sqrt[102786200873187/1349663]/2, 2554021/2324, 390}, 
     {2327, Sqrt[51529808213981/2706301], 2570489/2327, 394}, 
     {2330, Sqrt[103441959750629/5426570], 2591661/2330, 394}, 
     {2333, 10*Sqrt[259406864834/1360139], 2610447/2333, 394}, 
     {2336, Sqrt[26001685450799/340910]/2, 1312809/1168, 397}, 
     {2339, Sqrt[52087092462309/2734291], 2634932/2339, 398}, 
     {2342, Sqrt[104310819304913/5482622], 2639391/2342, 398}, 
     {2345, 2*Sqrt[3264134899618/687085], 2640063/2345, 398}, 
     {2348, Sqrt[104598744585731/1377689]/2, 2639733/2348, 398}, 
     {2351, Sqrt[52381430147361/110497]/5, 2637089/2351, 398}, 
     {2354, Sqrt[52468410655598/2769481], 1316746/1177, 397}, 
     {2357, Sqrt[26299792614461/1388273], 2624142/2357, 394}, 
     {2360, Sqrt[26364705434479/1391810], 1307471/1180, 394}, 
     {2363, Sqrt[52807071837107/2790703], 2613985/2363, 394}, 
     {2366, (3*Sqrt[11750820141493/33110])/13, 2614335/2366, 394}, 
     {2369, Sqrt[52950340389561/175306]/4, 2614632/2369, 394}, 
     {2372, Sqrt[106037465085651/1406003]/2, 2618433/2372, 394}, 
     {2375, Sqrt[53088133929423/112765]/5, 2620102/2375, 394}, 
     {2378, Sqrt[53164719572046/2826253], 1309733/1189, 394}, 
     {2381, Sqrt[26646892058399/1416695], 2610386/2381, 394}, 
     {2384, 2*Sqrt[1672823252203/355067], 162067/149, 390}, 
     {2387, Sqrt[53764178448377/2847691], 2575939/2387, 386}, 
     {2390, 2*Sqrt[13521123987878/2854855], 1277067/1195, 749/2}, 
     {2393, Sqrt[13605698021230/715507], 2531344/2393, 372}, 
     {2396, Sqrt[5476330784353/286921], 1254221/1198, 371}, 
     {2399, 18*Sqrt[15501927698/261491], 2479406/2399, 363}, 
     {2402, (3*Sqrt[6199484258822/1201])/49, 1223998/1201, 363}, 
     {2405, 3*Sqrt[6256491019953/2890810], 2417819/2405, 362}, 
     {2408, Sqrt[113874454679639/1449014]/2, 2383537/2408, 362}, 
     {2411, 3*Sqrt[6418303339467/2905255], 2343190/2411, 362}, 
     {2414, 2*Sqrt[14671358309009/2912491], 1150088/1207, 355}, 
     {2417, Sqrt[29783013794179/364967]/2, 2258263/2417, 352}, 
     {2420, (2*Sqrt[7540502235441/12095])/11, 554973/605, 703/2}, 
     {2423, Sqrt[61174379538961/2934253], 2178904/2423, 351}, 
     {2426, Sqrt[124230712910749/235322]/5, 2135349/2426, 343}, 
     {2429, Sqrt[62806452912055/2948806], 2099051/2429, 339}, 
     {2432, Sqrt[126989266977127/92378]/8, 2062843/2432, 339}, 
     {2435, Sqrt[64006228251137/2963395], 2032826/2435, 335}, 
     {2438, 3*Sqrt[14337400529981/5941406], 2002797/2438, 649/2}, 
     {2441, Sqrt[16291827989823/744505], 1967860/2441, 307}, 
     {2444, Sqrt[131422374149923/1492673]/2, 1936559/2444, 605/2}, 
     {2447, 8*Sqrt[1035714008005/2992681], 1904162/2447, 299}, 
     {2450, (6*Sqrt[1856325284978/2449])/35, 936464/1225, 283}, 
     {2453, Sqrt[3063794219389/136699], 167317/223, 272}, 
     {2456, Sqrt[33974602345859/1507370], 904557/1228, 271}, 
     {2459, Sqrt[68431563446565/3022111], 1780136/2459, 270}, 
     {2462, Sqrt[137712239722681/6058982], 1753611/2462, 264}, 
     {2465, (23*Sqrt[130713428663/189805])/4, 1733331/2465, 262}, 
     {2468, Sqrt[139072734302107/1522139]/2, 1708255/2468, 254}, 
     {2471, 4*Sqrt[124659078513/87191], 241310/353, 251}, 
     {2474, 2*Sqrt[17509900738214/3059101], 836247/1237, 250}, 
     {2477, 2*Sqrt[8783742862909/1533263], 1655817/2477, 248}, 
     {2480, Sqrt[28177490853291/76849]/4, 328655/496, 495/2}, 
     {2483, 3*Sqrt[461292183903/181259], 1634540/2483, 246}, 
     {2486, Sqrt[141482903698573/6177710], 1623089/2486, 246}, 
     {2489, (3*Sqrt[7876487535117/774079])/2, 1612989/2489, 245}, 
     {2492, Sqrt[35489944926817/1551893], 805751/1246, 485/2}, 
     {2495, Sqrt[71071672151423/3111265], 1609923/2495, 240}, 
     {2498, 2*Sqrt[17790356447895/3118753], 806560/1249, 240}, 
     {2501, (3*Sqrt[1583632970041/25010])/5, 1621123/2501, 245}, 
     {2504, Sqrt[17841352177270/783439], 407273/626, 491/2}, 
     {2507, 3*Sqrt[7939142951561/3141271], 1630681/2507, 246}, 
     {2510, 2*Sqrt[17885213406777/3148795], 817329/1255, 246}, 
     {2513, Sqrt[71629223880457/789082]/2, 1638551/2513, 247}, 
     {2516, Sqrt[7171926182473/316387], 821673/1258, 248}, 
     {2519, Sqrt[71865368457414/3171421], 1656913/2519, 250}, 
     {2522, Sqrt[144023542832341/6357962], 1670533/2522, 501/2}, 
     {2525, 29*Sqrt[3430393829/127462], 67219/101, 254}, 
     {2528, Sqrt[20633393527537/158]/76, 1686595/2528, 258}, 
     {2531, 3*Sqrt[1607015555418/640343], 1693880/2531, 264}, 
     {2534, Sqrt[144827013038069/6418622], 1700947/2534, 267}, 
     {2537, Sqrt[18127687358094/804229], 1707897/2537, 270}, 
     {2540, (3*Sqrt[16134995059459/1612265])/2, 1714677/2540, 272}, 
     {2543, Sqrt[72697565969697/3232153], 1716254/2543, 272}, 
     {2546, 3*Sqrt[1617521462258/647957], 857649/1273, 272}, 
     {2549, Sqrt[5206327579210/231959], 1711802/2549, 270}, 
     {2552, Sqrt[36511504140415/1627538], 851629/1276, 267}, 
     {2555, Sqrt[10456954427594/466105], 241549/365, 264}, 
     {2558, 2*Sqrt[18352272028510/3270403], 837916/1279, 258}, 
     {2561, Sqrt[1131427797485/197]/16, 128261/197, 254}, 
     {2564, Sqrt[36815564572082/1642883], 417005/641, 254}, 
     {2567, Sqrt[73727646029218/3293461], 1673784/2567, 262}, 
     {2570, Sqrt[147698432273661/6602330], 1684653/2570, 264}, 
     {2573, Sqrt[37004135342577/1654439], 1699527/2573, 270}, 
     {2576, Sqrt[148395879582807/16583]/20, 1717035/2576, 271}, 
     {2579, 4*Sqrt[4654214001734/3324331], 1739607/2579, 272}, 
     {2582, 2*Sqrt[18695849316563/3332071], 882262/1291, 283}, 
     {2585, Sqrt[37574655797291/1669910], 1791976/2585, 299}, 
     {2588, Sqrt[37718757174617/1673789], 907787/1294, 605/2}, 
     {2591, 2*Sqrt[18966742783791/3355345], 1845775/2591, 307}, 
     {2594, 3*Sqrt[16940783664401/6726242], 1873245/2594, 649/2}, 
     {2597, Sqrt[781119912570/34397], 271197/371, 335}, 
     {2600, Sqrt[59108967470/2599], 7393/10, 339}, 
     {2603, 9*Sqrt[953642042707/3386503], 1951156/2603, 339}, 
     {2606, Sqrt[77855678758202/3394315], 993967/1303, 343}, 
     {2609, Sqrt[9802884801757/425267], 2023336/2609, 351}, 
     {2612, Sqrt[39494881967459/1704983], 1029357/1306, 703/2}, 
     {2615, Sqrt[79599258687593/3417805], 2095448/2615, 352}, 
     {2618, Sqrt[14598314280203/622846], 194083/238, 355}, 
     {2621, 74*Sqrt[7394639701/1716755], 2174498/2621, 362}, 
     {2624, Sqrt[163632139724807/107543]/8, 2218027/2624, 362}, 
     {2627, 10*Sqrt[63571991474/265327], 2261487/2627, 362}, 
     {2630, Sqrt[7596685377038/314285], 1153726/1315, 363}, 
     {2633, Sqrt[84519864164531/866257]/2, 2354362/2633, 363}, 
     {2636, Sqrt[170317004562659/1736465]/2, 2392145/2636, 371}, 
     {2639, 2*Sqrt[21448772160238/3480841], 2429866/2639, 372}, 
     {2642, 2*Sqrt[21629381034162/3488761], 1235093/1321, 749/2}, 
     {2645, Sqrt[43762203092874/3305]/23, 2518417/2645, 386}, 
     {2648, Sqrt[44214522054635/1752314], 1281987/1324, 390}, 
     {2651, (2*Sqrt[22372573574561/140503])/5, 2613506/2651, 394}, 
     {2654, Sqrt[12977867446126/502933], 1334815/1327, 394}, 
     {2657, (5*Sqrt[923239225465/220531])/2, 2728394/2657, 394}, 
     {2660, 3*Sqrt[5187771412729/1768235], 1388897/1330, 397}, 
     {2663, (3*Sqrt[10498731403738/29293])/11, 2828462/2663, 398}, 
     {2666, Sqrt[190675054691609/7104890], 2872417/2666, 398}, 
     {2669, Sqrt[95962133852437/3560446], 2909716/2669, 398}, 
     {2672, Sqrt[12090153395013/446057], 737801/668, 399}, 
     {2675, 4*Sqrt[243385302842/143059], 597756/535, 399}, 
     {2678, Sqrt[195679608026665/7169006], 3021003/2678, 801/2}, 
     {2681, Sqrt[98169859311907/898135]/2, 3046528/2681, 402}, 
     {2684, (5*Sqrt[7879937157627/1800293])/2, 3072015/2684, 404}, 
     {2687, Sqrt[98685718597389/3608641], 3088098/2687, 408}, 
     {2690, Sqrt[39524067820821/1446682], 619227/538, 821/2}, 
     {2693, Sqrt[98922180139617/3624778], 3098853/2693, 413}, 
     {2696, Sqrt[198113677718367/37070]/14, 3094923/2696, 408}, 
     {2699, 4*Sqrt[6204977728727/3640951], 3082894/2699, 404}, 
     {2702, Sqrt[768651940527/28178], 438305/386, 403}, 
     {2705, (3*Sqrt[5548640903931/2705])/26, 3049292/2705, 402}, 
     {2708, 3*Sqrt[5563113512405/1832639], 1517275/1354, 399}, 
     {2711, Sqrt[100500711073006/3673405], 3014431/2711, 399}, 
     {2714, Sqrt[202135351890993/7363082], 2986183/2714, 797/2}, 
     {2717, 2*Sqrt[12743141318151/1844843], 2948384/2717, 398}, 
     {2720, Sqrt[12122315931263/27190]/4, 170889/160, 398}, 
     {2723, 2*Sqrt[25967949231867/3706003], 2868650/2723, 397}, 
     {2726, (6*Sqrt[2905671592506/148567])/5, 1417480/1363, 791/2}, 
     {2729, 4*Sqrt[1648116221167/930589], 2797221/2729, 394}, 
     {2732, Sqrt[213507804683707/1865273]/2, 2749865/2732, 394}, 
     {2735, 2*Sqrt[5386923774826/747749], 541874/547, 394}, 
     {2738, Sqrt[217328548706005/5474]/37, 2670293/2738, 386}, 
     {2741, Sqrt[10987364267422/375517], 2624377/2741, 377}, 
     {2744, Sqrt[222549492649847/38402]/14, 2574335/2744, 372}, 
     {2747, Sqrt[112427257580133/3771631], 2529792/2747, 372}, 
     {2750, (2*Sqrt[28379580734167/151195])/5, 1243304/1375, 733/2}, 
     {2753, Sqrt[114921133184139/236758]/4, 2436531/2753, 363}, 
     {2756, Sqrt[58302557344721/1898195], 1190467/1378, 725/2}, 
     {2759, Sqrt[118213930456926/3804661], 2326760/2759, 362}, 
     {2762, Sqrt[119552251626218/3812941], 1139054/1381, 362}, 
     {2765, Sqrt[120762163808117/3821230], 2232184/2765, 358}, 
     {2768, Sqrt[244896950877231/478691]/4, 2176545/2768, 352}, 
     {2771, Sqrt[124527197541242/3837835], 2113986/2771, 352}, 
     {2774, 2*Sqrt[31610984206135/3846151], 1027095/1387, 351}, 
     {2777, Sqrt[128524737996415/963619]/2, 1991596/2777, 345}, 
     {2780, Sqrt[261725232082011/1931405]/2, 1924847/2780, 340}, 
     {2783, Sqrt[133289096177605/31993]/11, 1856722/2783, 339}, 
     {2786, Sqrt[271430910497221/7759010], 1788599/2786, 337}, 
     {2789, 2*Sqrt[17256027400081/1943933], 1721930/2789, 335}, 
     {2792, Sqrt[281504360719063/1948118]/2, 1649663/2792, 621/2}, 
     {2795, Sqrt[28771985347015/780923], 314360/559, 306}, 
     {2798, Sqrt[294784588919153/7826006], 1488355/2798, 299}, 
     {2801, Sqrt[150924112249747/39214]/10, 1404917/2801, 292}, 
     {2804, Sqrt[310563441718547/1964903]/2, 1311637/2804, 273}, 
     {2807, Sqrt[159519047416854/3938221], 1219726/2807, 272}, 
     {2810, (2*Sqrt[40939324782303/1405])/53, 563902/1405, 270}, 
     {2813, 3*Sqrt[18639040127777/3955078], 1038725/2813, 264}, 
     {2816, (7*Sqrt[1744455236487/30965])/8, 479757/1408, 263}, 
     {2819, 4*Sqrt[10871913955193/3971971], 883159/2819, 254}, 
     {2822, 5*Sqrt[1013564893106/568633], 400577/1411, 505/2}, 
     {2825, Sqrt[90400245225919/79778]/5, 719032/2825, 250}, 
     {2828, Sqrt[13143685968218/285527], 22848/101, 249}, 
     {2831, 4*Sqrt[11721673825963/4005865], 556267/2831, 248}, 
     {2834, 3*Sqrt[42513967308849/8028722], 469975/2834, 493/2}, 
     {2837, 3*Sqrt[10864285031265/2011433], 377990/2837, 246}, 
     {2840, Sqrt[9971664871510/201569], 7258/71, 491/2}, 
     {2843, Sqrt[28993948175993/577129], 206980/2843, 245}, 
     {2846, 3*Sqrt[45860200964889/8096870], 125105/2846, 240}, 
     {2849, (9*Sqrt[2591288337763/253561])/4, 41777/2849, 240}, 
     {2852, Sqrt[427768766094435/2032763]/2, -47249/2852, 240}, 
     {2855, 2*Sqrt[10881935045419/814817], -26679/571, 240}, 
     {2858, Sqrt[442315272944973/8165306], -216665/2858, 238}, 
     {2861, 3*Sqrt[1133057867366/185965], -295638/2861, 238}, 
     {2864, Sqrt[455066271842351/512477]/4, -374609/2864, 235}, 
     {2867, Sqrt[230614536426631/4108411], -452096/2867, 232}, 
     {2870, Sqrt[466187442496481/8234030], -520913/2870, 230}, 
     {2873, Sqrt[13840753014431/359]/26, -34435/169, 228}, 
     {2876, Sqrt[118882823030861/82685]/5, -327103/1438, 224}, 
     {2879, 2*Sqrt[60109039130209/4142881], -725950/2879, 222}, 
     {2882, Sqrt[243106135808002/4151521], -398843/1441, 431/2}, 
     {2885, Sqrt[122887210596306/2080085], -869396/2885, 212}, 
     {2888, Sqrt[496316367620031/5774]/38, -936797/2888, 208}, 
     {2891, (3*Sqrt[27848177602747/295])/119, -1005647/2891, 208}, 
     {2894, 10*Sqrt[2528418074001/4186171], -535089/1447, 205}, 
     {2897, (3*Sqrt[14174367163233/524357])/2, -1136205/2897, 201}, 
     {2900, 8*Sqrt[80447954983/84071], -12022/29, 401/2}, 
     {2903, 3*Sqrt[28810729728607/4212253], -1260885/2903, 200}, 
     {2906, Sqrt[104529430355605/1688386], -1322449/2906, 200}, 
     {2909, Sqrt[131674634595374/2114843], -1383991/2909, 194}, 
     {2912, Sqrt[530254253911703/529802]/4, -1441117/2912, 387/2}, 
     {2915, Sqrt[266833887517398/4247155], -1496832/2915, 190}, 
     {2918, Sqrt[537726533321157/8511806], -1558435/2918, 183}, 
     {2921, Sqrt[270976310897789/1066165]/2, -1621455/2921, 182}, 
     {2924, 5*Sqrt[5460038504011/2136713], -841497/1462, 179}, 
     {2927, 2*Sqrt[9816452144261/611743], -1741598/2927, 179}, 
     {2930, 12*Sqrt[1921653227842/4290985], -900089/1465, 355/2}, 
     {2933, Sqrt[278341927428095/4299778], -1854374/2933, 176}, 
     {2936, Sqrt[27968329763599/430858], -951359/1468, 176}, 
     {2939, 3*Sqrt[31265498083187/4317391], -1958417/2939, 176}, 
     {2942, Sqrt[283097536279090/4326211], -1007076/1471, 349/2}, 
     {2945, Sqrt[284649798902343/67735]/8, -2066927/2945, 173}, 
     {2948, Sqrt[572855056052187/2171939]/2, -2124047/2948, 345/2}, 
     {2951, (4*Sqrt[17989602648802/174109])/5, -2173792/2951, 168}, 
     {2954, Sqrt[289314705639966/4361581], -1112512/1477, 165}, 
     {2957, Sqrt[145673070228309/2185223], -2286654/2957, 163}, 
     {2960, Sqrt[586262564892319/547415]/4, -2343911/2960, 163}, 
     {2963, 3*Sqrt[32751585949177/4388203], -2398282/2963, 163}, 
     {2966, Sqrt[296256900859346/4397095], -1224875/1483, 161}, 
     {2969, Sqrt[42545268078401/157357]/2, -2502676/2969, 160}, 
     {2972, Sqrt[149846497443583/2207453], -1280793/1486, 158}, 
     {2975, Sqrt[301254537976563/176953]/5, -2614543/2975, 154}, 
     {2978, Sqrt[605079733753733/8865506], -2661521/2978, 307/2}, 
     {2981, Sqrt[151787603047021/2220845], -2702509/2981, 153}, 
     {2984, Sqrt[152133134692519/2225318], -1366503/1492, 153}, 
     {2987, Sqrt[304921485307814/4459591], -2762001/2987, 152}, 
     {2990, 2*Sqrt[311667153485/18239], -278501/299, 283/2}, 
     {2993, Sqrt[305805338940581/1119382]/2, -2799033/2993, 131}, 
     {2996, Sqrt[612322517892139/2243255]/2, -2811561/2996, 261/2}, 
     {2999, Sqrt[306492558142846/4495501], -2821086/2999, 130}, 
     {3002, Sqrt[613773554495977/9009002], -2836625/3002, 124}, 
     {3005, 3*Sqrt[34139828743807/4513510], -2850658/3005, 117}, 
     {3008, Sqrt[615161838979263/141329]/8, -2858687/3008, 116}, 
     {3011, Sqrt[61582505149546/906311], -2868248/3011, 111}, 
     {3014, Sqrt[308244255737410/4540591], -1438912/1507, 110}, 
     {3017, Sqrt[154288033342607/2274818], -2887412/3017, 107}, 
     {3020, Sqrt[617897735259451/2279345]/2, -2901537/3020, 106}, 
     {3023, Sqrt[309383710767785/4567753], -2920217/3023, 98}, 
     {3026, (2*Sqrt[15493582427393/7565])/11, -1470971/1513, 183/2}, 
     {3029, Sqrt[23869762699657/352762], -227742/233, 90}, 
     {3032, Sqrt[621258109560183/2297498]/2, -2968463/3032, 86}, 
     {3035, 8*Sqrt[26262716297/24887], -595250/607, 86}, 
     {3038, Sqrt[622566448002033/188294]/7, -2985887/3038, 85}, 
     {3041, Sqrt[311606772221253/288895]/4, -2994072/3041, 85}, 
     {3044, Sqrt[623857381008195/2315723]/2, -3001779/3044, 85}, 
     {3047, Sqrt[312261846010678/4640581], -2998747/3047, 85}, 
     {3050, Sqrt[625202151077001/371978]/5, -2994093/3050, 85}, 
     {3053, 6*Sqrt[4346384074685/2329439], -2989500/3053, 85}, 
     {3056, Sqrt[31325476103139/116701]/2, -1494717/1528, 85}, 
     {3059, Sqrt[44795719752411/668173], -427378/437, 85}, 
     {3062, 2*Sqrt[78473800153761/4686391], -1500017/1531, 85}, 
     {3065, Sqrt[314208517920307/1173895]/2, -3000606/3065, 85}, 
     {3068, Sqrt[629094164640915/2352389]/2, -2995979/3068, 85}, 
     {3071, Sqrt[314869182870643/4713985], -2994036/3071, 85}, 
     {3074, Sqrt[630424276859877/9446402], -2988915/3074, 171/2}, 
     {3077, Sqrt[157777969316538/2366213], -2983716/3077, 86}, 
     {3080, Sqrt[631802497232959/2370830]/2, -2978299/3080, 88}, 
     {3083, 3*Sqrt[35135442242873/4750903], -2983427/3083, 86}, 
     {3086, Sqrt[316536868071722/4760155], -1494301/1543, 171/2}, 
     {3089, Sqrt[316847438132819/1192354]/2, -2990605/3089, 85}, 
     {3092, Sqrt[634348505908123/2389343]/2, -2987837/3092, 85}, 
     {3095, 9*Sqrt[560186120021/683995], -2974474/3095, 86}, 
     {3098, Sqrt[318283321330786/4797253], -1475806/1549, 86}, 
     {3101, Sqrt[319273307972807/192262]/5, -2918191/3101, 90}, 
     {3104, Sqrt[641479688189503/601982]/4, -2873743/3104, 183/2}, 
     {3107, 2*Sqrt[80637483078653/4825171], -2822817/3107, 98}, 
     {3110, Sqrt[64873257676814/966899], -277177/311, 106}, 
     {3113, Sqrt[162880277772101/2421914], -2728816/3113, 107}, 
     {3116, Sqrt[23368640993506/346655], -671432/779, 110}, 
     {3119, 2*Sqrt[82207103224871/4862521], -2637326/3119, 111}, 
     {3122, Sqrt[330200232371194/4871881], -1297482/1561, 116}, 
     {3125, Sqrt[165679216037894/3905]/25, -2557257/3125, 117}, 
     {3128, Sqrt[166240293030023/2445314], -1260243/1564, 124}, 
     {3131, Sqrt[333424300838907/4900015], -2488358/3131, 130}, 
     {3134, Sqrt[334624234997586/4909411], -1224929/1567, 261/2}, 
     {3137, Sqrt[168094473902659/3137]/28, -2403453/3137, 131}, 
     {3140, Sqrt[675033741880419/2464115]/2, -2361931/3140, 283/2}, 
     {3143, Sqrt[339162413005769/4937653], -2314066/3143, 152}, 
     {3146, Sqrt[681814259394969/81770]/11, -2264235/3146, 153}, 
     {3149, Sqrt[342947920955569/4956526], -2209238/3149, 153}, 
     {3152, Sqrt[690825011602247/620747]/4, -2147565/3152, 307/2}, 
     {3155, Sqrt[348221185050617/4975435], -2080939/3155, 154}, 
     {3158, 3*Sqrt[38997577463858/4984903], -1007517/1579, 158}, 
     {3161, Sqrt[70781490252843/249719]/2, -1946759/3161, 160}, 
     {3164, Sqrt[178596784046005/2501933], -936903/1582, 161}, 
     {3167, 2*Sqrt[90026629997357/5013361], -1805754/3167, 163}, 
     {3170, 2*Sqrt[18127235435806/1004573], -174456/317, 163}, 
     {3173, Sqrt[182252001529727/2516189], -1690963/3173, 163}, 
     {3176, Sqrt[18334019413394/252095], -408427/794, 165}, 
     {3179, Sqrt[368675569844294/17479]/17, -1579481/3179, 168}, 
     {3182, 2*Sqrt[92580870546433/5060971], -765797/1591, 345/2}, 
     {3185, Sqrt[185978211107009/12935]/14, -1483837/3185, 173}, 
     {3188, 4*Sqrt[11669916278138/2540039], -359784/797, 349/2}, 
     {3191, Sqrt[375140062478307/5089645], -1390109/3191, 176}, 
     {3194, 12*Sqrt[2617974417270/5099221], -669267/1597, 176}, 
     {3197, Sqrt[379223581268543/5108806], -1280386/3197, 176}, 
     {3200, Sqrt[764509469601559/6398]/40, -1210771/3200, 355/2}, 
     {3203, Sqrt[385195866487778/5128003], -1142352/3203, 179}, 
     {3206, Sqrt[776353143216437/10275230], -1073403/3206, 179}, 
     {3209, Sqrt[97839406153546/1286809], -1001817/3209, 182}, 
     {3212, Sqrt[789483222662411/15257]/26, -927633/3212, 183}, 
     {3215, Sqrt[398548947658487/5166505], -848456/3215, 190}, 
     {3218, Sqrt[805225691038333/10352306], -766273/3218, 387/2}, 
     {3221, Sqrt[406235231186583/5185810], -689214/3221, 194}, 
     {3224, Sqrt[819707409610935/2597738]/2, -612201/3224, 200}, 
     {3227, 2*Sqrt[103506456250119/5205151], -528872/3227, 200}, 
     {3230, Sqrt[837020793256201/10429670], -442087/3230, 401/2}, 
     {3233, Sqrt[423307455899363/326533]/4, -352032/3233, 201}, 
     {3236, Sqrt[857609536952339/2617115]/2, -255065/3236, 205}, 
     {3239, 3*Sqrt[48286535024963/5243941], -155540/3239, 208}, 
     {3242, Sqrt[882911430059389/10507322], -46245/3242, 208}, 
     {3245, Sqrt[224078721980614/2631695], 61608/3245, 212}, 
     {3248, Sqrt[908575426434535/659141]/4, 164445/3248, 431/2}, 
     {3251, Sqrt[460405834296713/211315]/5, 267169/3251, 222}, 
     {3254, 2*Sqrt[116502097403246/5292631], 182571/1627, 224}, 
     {3257, Sqrt[472205596392719/1325599]/2, 468573/3257, 228}, 
     {3260, 2*Sqrt[59711354749599/2656085], 141359/815, 230}, 
     {3263, Sqrt[69061637962919/760279], 664706/3263, 232}, 
     {3266, Sqrt[979082869872489/10663490], 767359/3266, 235}, 
     {3269, 2*Sqrt[61959941696047/2670773], 870260/3269, 238}, 
     {3272, 2*Sqrt[31397983044377/1337839], 244499/818, 238}, 
     {3275, Sqrt[20395618171401/214447], 218534/655, 240}, 
     {3278, Sqrt[1035598304661289/10742006], 1210411/3278, 240}, 
     {3281, Sqrt[526318589159373/1345210]/2, 1332849/3281, 240}, 
     {3284, Sqrt[1069203724792851/55007]/14, 1453515/3284, 240}, 
     {3287, Sqrt[542716080923137/5400541], 1572859/3287, 245}, 
     {3290, 3*Sqrt[122408959985861/10820810], 1692279/3290, 491/2}, 
     {3293, Sqrt[560037556457259/5420278], 1819728/3293, 246}, 
     {3296, Sqrt[1140315685981039/678770]/4, 1953689/3296, 493/2}, 
     {3299, Sqrt[579118231838371/5440051], 2079363/3299, 248}, 
     {3302, Sqrt[1173656093629829/10899902], 2195489/3302, 249}, 
     {3305, (3*Sqrt[13203125176387/272993])/2, 461690/661, 250}, 
     {3308, 5*Sqrt[12041088063637/2734889], 1213113/1654, 505/2}, 
     {3311, 6*Sqrt[3387668854054/1095941], 2542469/3311, 254}, 
     {3314, Sqrt[1233333662690729/10979282], 2651883/3314, 263}, 
     {3317, 9*Sqrt[3855132532157/2749793], 2769275/3317, 264}, 
     {3320, 3*Sqrt[35167521151411/2754770], 1445719/1660, 270}, 
     {3323, Sqrt[640654089265766/5519503], 3006989/3323, 272}, 
     {3326, Sqrt[1295758066531521/442358]/5, 3119227/3326, 273}, 
     {3329, Sqrt[327987869394977/43277]/8, 3238433/3329, 292}, 
     {3332, Sqrt[1326475129874243/56627]/14, 3350971/3332, 299}, 
     {3335, Sqrt[669883605069683/5559445], 3458327/3335, 306}, 
     {3338, Sqrt[1353808279895933/11138906], 3568817/3338, 621/2}, 
     {3341, Sqrt[684712386377593/5579470], 3685763/3341, 335}, 
     {3344, Sqrt[86483449096626/698687], 237339/209, 337}, 
     {3347, 12*Sqrt[4845092559758/5599531], 3897375/3347, 339}, 
     {3350, Sqrt[703284397841618/224383]/5, 1997596/1675, 340}, 
     {3353, Sqrt[177454231653457/1404907], 4101561/3353, 345}, 
     {3356, Sqrt[358461525132053/2814845], 2106405/1678, 351}, 
     {3359, Sqrt[723252891790934/5639761], 4317343/3359, 352}, 
     {3362, (2*Sqrt[182167516586793/3361])/41, 2206744/1681, 352}, 
     {3365, Sqrt[366772754123331/3365]/29, 4504236/3365, 358}, 
     {3368, 3*Sqrt[3155509086519/218078], 2297325/1684, 362}, 
     {3371, 2*Sqrt[37155503960567/1136027], 4683722/3371, 362}, 
     {3374, 2*Sqrt[186728191276367/5690251], 2381277/1687, 725/2}, 
     {3377, Sqrt[750444431164189/1425094]/2, 4838159/3377, 363}, 
     {3380, Sqrt[1508170212898859/16895]/26, 4915111/3380, 733/2}, 
     {3383, 2*Sqrt[189429684495985/5720653], 4991978/3383, 372}, 
     {3386, 3*Sqrt[16931391697938/1146161], 2537666/1693, 372}, 
     {3389, Sqrt[766917382129419/47446]/11, 5167387/3389, 377}, 
     {3392, Sqrt[1543571055828543/179723]/8, 5258049/3392, 386}, 
     {3395, Sqrt[776656603459887/5761315], 5348741/3395, 394}, 
     {3398, 2*Sqrt[195465338209910/5771503], 2721368/1699, 394}, 
     {3401, Sqrt[787206529202899/57817]/10, 5538174/3401, 394}, 
     {3404, Sqrt[396636286140181/2895953], 2820187/1702, 791/2}, 
     {3407, Sqrt[798400777565478/5802121], 5733600/3407, 397}, 
     {3410, Sqrt[1607206339903809/11624690], 5827549/3410, 398}, 
     {3413, 2*Sqrt[101146284836085/2911289], 5925112/3413, 398}, 
     {3416, Sqrt[325691886265747/583282]/2, 6017715/3416, 797/2}, 
     {3419, Sqrt[819486122761607/5843071], 6112213/3419, 399}, 
     {3422, 7*Sqrt[580906908398/201839], 107132/59, 399}, 
     {3425, Sqrt[415371557763821/29318]/10, 6308429/3425, 402}, 
     {3428, Sqrt[1671708850447499/2936939]/2, 6401549/3428, 403}, 
     {3431, Sqrt[841321453609247/120085]/7, 6498162/3431, 404}, 
     {3434, 2*Sqrt[211653459528790/5894461], 3296508/1717, 408}, 
     {3437, Sqrt[851057674842007/5904766], 6679191/3437, 413}, 
     {3440, Sqrt[428077930724879/739385]/2, 3386091/1720, 413}, 
     {3443, 7*Sqrt[17580490127215/5925403], 6866990/3443, 414}, 
     {3446, Sqrt[346837306511037/2374294], 6965337/3446, 829/2}, 
     {3449, Sqrt[218181955139454/1486519], 7063537/3449, 415}, 
     {3452, Sqrt[1755290951293027/2978213]/2, 7154705/3452, 418}, 
     {3455, Sqrt[882762173590438/5966785], 7247882/3455, 420}, 
     {3458, Sqrt[1775713847725765/11954306], 7340839/3458, 420}, 
     {3461, 3*Sqrt[49638307324501/2993765], 7439028/3461, 420}, 
     {3464, Sqrt[224482899981986/1499479], 1881293/866, 841/2}, 
     {3467, Sqrt[902339550421899/6008311], 7610946/3467, 421}, 
     {3470, 2*Sqrt[226538105719273/6018715], 3844928/1735, 423}, 
     {3473, Sqrt[454637727768905/753641]/2, 7760058/3473, 429}, 
     {3476, (4*Sqrt[28520764410866/120791])/5, 1958457/869, 431}, 
     {3479, Sqrt[915439123013845/123469]/7, 7899109/3479, 432}, 
     {3482, Sqrt[1836445519535105/3482]/59, 7964515/3482, 871/2}, 
     {3485, 3*Sqrt[102347425586297/6070870], 8031668/3485, 437}, 
     {3488, Sqrt[1848850662687679/760166]/4, 8104209/3488, 443}, 
     {3491, Sqrt[927849704982001/6091795], 8178293/3491, 443}, 
     {3494, Sqrt[1862556169289609/12204542], 8252431/3494, 444}, 
     {3497, 8*Sqrt[3651641023531/1528189], 8328097/3497, 445}, 
     {3500, (9*Sqrt[23179698124019/122465])/10, 8408781/3500, 448}, 
     {3503, Sqrt[30401893171889/197863], 273747/113, 453}, 
     {3506, Sqrt[189358174218994/1228853], 4285502/1753, 917/2}, 
     {3509, Sqrt[951167961252149/50866]/11, 8656468/3509, 461}, 
     {3512, Sqrt[238811101754518/1541329], 1092316/439, 464}, 
     {3515, 3*Sqrt[106579392001878/6175855], 8819279/3515, 474}, 
     {3518, 2*Sqrt[240651598633005/6186403], 4446518/1759, 971/2}, 
     {3521, Sqrt[483137574667271/193655]/4, 8970267/3521, 489}, 
     {3524, 5*Sqrt[19401926037298/3103763], 2262335/881, 492}, 
     {3527, 2*Sqrt[243413115005046/6218101], 9125100/3527, 492}, 
     {3530, Sqrt[390580832371865/2491474], 1838123/706, 493}, 
     {3533, Sqrt[978493317033569/6239278], 9243737/3533, 493}, 
     {3536, 4*Sqrt[7659787751849/781235], 580956/221, 496}, 
     {3539, 6*Sqrt[27280093888958/6260491], 9339736/3539, 496}, 
     {3542, 18*Sqrt[275934531099/570101], 426231/161, 500}, 
     {3545, (7*Sqrt[20104707638243/1570435])/2, 9423266/3545, 501}, 
     {3548, Sqrt[493415170852957/3146189], 4734721/1774, 1005/2}, 
     {3551, Sqrt[988528831872281/252121]/5, 9515594/3551, 507}, 
     {3554, 2*Sqrt[247575841131819/6313681], 4781696/1777, 512}, 
     {3557, Sqrt[992074138554669/6324346], 9611109/3557, 513}, 
     {3560, Sqrt[1986698110599991/3167510]/2, 9646303/3560, 514}, 
     {3563, Sqrt[994707219899609/6345703], 9683965/3563, 515}, 
     {3566, 4*Sqrt[62253925817582/6356395], 4860777/1783, 522}, 
     {3569, 2*Sqrt[31167155922538/795887], 9757071/3569, 522}, 
     {3572, Sqrt[499241526668574/3188903], 2446859/893, 522}, 
     {3575, (304*Sqrt[983364742/23231])/5, 892686/325, 524}, 
     {3578, (6*Sqrt[27804261868098/130597])/7, 4927571/1789, 1051/2}, 
     {3581, 2*Sqrt[125313364082486/3204995], 9897917/3581, 527}, 
     {3584, Sqrt[17924838042161/7166]/4, 354763/128, 1055/2}, 
     {3587, Sqrt[1004835471494221/6431491], 9959982/3587, 529}, 
     {3590, Sqrt[2011952364519201/12884510], 9990573/3590, 531}, 
     {3593, Sqrt[1007032491575133/1613257]/2, 10017736/3593, 532}, 
     {3596, 8*Sqrt[1574977311399/646381], 2509886/899, 532}, 
     {3599, 2*Sqrt[252216752015365/6474601], 10055760/3599, 533}, 
     {3602, Sqrt[2019706204505673/12970802], 10079055/3602, 1071/2}, 
     {3605, Sqrt[72217554838403/464015], 1444502/515, 537}, 
     {3608, Sqrt[505984302632795/3253514], 5065637/1804, 545}, 
     {3611, (2*Sqrt[253221871781461/18055])/19, 10150810/3611, 545}, 
     {3614, 32*Sqrt[990028869217/6528691], 5084150/1807, 1105/2}, 
     {3617, Sqrt[1014643084224265/408721]/4, 10173045/3617, 555}, 
     {3620, Sqrt[72539956594483/467885], 5085323/1810, 1095/2}, 
     {3623, 2*Sqrt[254140137564766/6561253], 10163017/3623, 545}, 
     {3626, (4*Sqrt[63599380112341/5365])/35, 5076899/1813, 541}, 
     {3629, 2*Sqrt[127323409405989/3291503], 10146371/3629, 537}, 
     {3632, Sqrt[509793586669223/824237]/2, 5069409/1816, 1067/2}, 
     {3635, 3*Sqrt[113425012982683/6604795], 10121744/3635, 532}, 
     {3638, Sqrt[2044399975233929/13231406], 10100775/3638, 532}, 
     {3641, Sqrt[1023494280362623/1656655]/2, 10081947/3641, 531}, 
     {3644, 3*Sqrt[56943097103047/3318773], 5028961/1822, 530}, 
     {3647, Sqrt[1026325254275795/6648481], 10037711/3647, 528}, 
     {3650, Sqrt[1027392574622378/266377]/5, 5013506/1825, 527}, 
     {3653, Sqrt[1028306471503781/6670378], 10024888/3653, 527}, 
     {3656, 4*Sqrt[16081564652842/1670335], 2505695/914, 524}, 
     {3659, Sqrt[1030403960701314/6692311], 10007832/3659, 522}, 
     {3662, 9*Sqrt[3638769741307/1915226], 9992727/3662, 522}, 
     {3665, (3*Sqrt[11473373562173/167857])/2, 1996908/733, 522}, 
     {3668, Sqrt[2066921009024955/3362639]/2, 9989223/3668, 522}, 
     {3671, Sqrt[1034318838867029/6736285], 9996038/3671, 522}, 
     {3674, 2*Sqrt[258816139957626/6747301], 4996070/1837, 522}, 
     {3677, Sqrt[1036338936080767/6758326], 9981140/3677, 516}, 
     {3680, Sqrt[12969686777594/84617], 62276/23, 1031/2}, 
     {3683, 12*Sqrt[7213929930091/6780403], 9947368/3683, 515}, 
     {3686, Sqrt[1040134799139798/6791455], 4963874/1843, 513}, 
     {3689, Sqrt[74392980130365/485894], 1415263/527, 512}, 
     {3692, 3*Sqrt[57953397912614/3406793], 2469659/923, 1019/2}, 
     {3695, 2*Sqrt[261115706016962/6824665], 9859852/3695, 504}, 
     {3698, Sqrt[2091387305366273/7394]/43, 9843039/3698, 501}, 
     {3701, Sqrt[104704334183629/684685], 9822631/3701, 501}, 
     {3704, Sqrt[262193882266714/3241]/23, 2448187/926, 995/2}, 
     {3707, Sqrt[1050338262813145/6869071], 9766788/3707, 496}, 
     {3710, Sqrt[60108648585171/393154], 278309/106, 989/2}, 
     {3713, Sqrt[1053121482052755/107677]/8, 9724385/3713, 493}, 
     {3716, Sqrt[2108586220028027/3451235]/2, 9709621/3716, 985/2}, 
     {3719, Sqrt[1055462124867622/40909]/13, 9694938/3719, 492}, 
     {3722, Sqrt[1056680475047842/1861]/61, 4839278/1861, 981/2}, 
     {3725, Sqrt[1057971468032617/5662]/35, 9659746/3725, 489}, 
     {3728, 3*Sqrt[14713841288726/868391], 1204657/466, 478}, 
     {3731, 8*Sqrt[2369258704866/994045], 1371671/533, 473}, 
     {3734, Sqrt[1063878869050878/6969511], 4779399/1867, 939/2}, 
     {3737, Sqrt[1066088741078713/1745179]/2, 9519898/3737, 462}, 
     {3740, Sqrt[533985208134146/3495965], 2371759/935, 461}, 
     {3743, 2*Sqrt[267492401446371/7003153], 9452092/3743, 456}, 
     {3746, 5*Sqrt[8573987913090/1402877], 4710667/1873, 901/2}, 
     {3749, 2*Sqrt[134139589018773/3512813], 9400432/3749, 448}, 
     {3752, Sqrt[48834191727789/319858], 4691699/1876, 889/2}, 
     {3755, Sqrt[1075449958810907/7048135], 9371911/3755, 444}, 
     {3758, Sqrt[126634680007873/830518], 9368009/3758, 443}, 
     {3761, Sqrt[538700050074743/883835]/2, 9360473/3761, 443}, 
     {3764, Sqrt[2156823070725659/3540983]/2, 9352571/3764, 437}, 
     {3767, Sqrt[1079674313647737/7093261], 9335098/3767, 434}, 
     {3770, Sqrt[2162412069043061/14209130], 9309927/3770, 432}, 
     {3773, Sqrt[22095102343873/145222], 1326657/539, 430}, 
     {3776, Sqrt[224318623586/59]/5, 144831/59, 427}, 
     {3779, 11*Sqrt[8966564774270/7138531], 9259571/3779, 421}, 
     {3782, Sqrt[2172003082725569/14299742], 9249953/3782, 421}, 
     {3785, Sqrt[217439247356137/358061]/2, 1846890/757, 420}, 
     {3788, Sqrt[2176686019187899/3586289]/2, 9220695/3788, 420}, 
     {3791, 2*Sqrt[54474697240885/1436789], 9206771/3791, 420}, 
     {3794, Sqrt[1090781430489518/7195321], 4594281/1897, 420}, 
     {3797, Sqrt[546070766529307/3603353], 9167904/3797, 416}, 
     {3800, Sqrt[546746250886631/144362]/5, 4573763/1900, 415}, 
     {3803, Sqrt[1094880254618126/7229503], 9126110/3803, 414}, 
     {3806, 3*Sqrt[121805775867414/7240915], 4552569/1903, 827/2}, 
     {3809, Sqrt[137202802191285/906542], 9084175/3809, 413}, 
     {3812, Sqrt[549316280532387/3631883], 4538233/1906, 821/2}, 
     {3815, Sqrt[1099679382438587/7275205], 9066914/3815, 408}, 
     {3818, 2*Sqrt[275184418534997/7286653], 4528407/1909, 407}, 
     {3821, Sqrt[1102074849430269/7298110], 9036833/3821, 404}, 
     {3824, 18*Sqrt[425819191021/913697], 1126121/478, 403}, 
     {3827, Sqrt[1105216301301599/7321051], 8985035/3827, 402}, 
     {3830, 2*Sqrt[55320867617062/1466507], 896934/383, 399}, 
     {3833, Sqrt[1107553689782843/1836007]/2, 8956008/3833, 399}, 
     {3836, 4*Sqrt[34654047524997/3677765], 2233729/959, 797/2}, 
     {3839, Sqrt[1110235606619583/7367041], 8915846/3839, 398}, 
     {3842, Sqrt[2222868003716821/14757122], 8900241/3842, 398}, 
     {3845, (2*Sqrt[139080938550171/3845])/31, 8884102/3845, 397}, 
     {3848, Sqrt[557043266626071/3700814], 4430657/1924, 791/2}, 
     {3851, (2*Sqrt[278866227849578/296527])/5, 8840168/3851, 394}, 
     {3854, 5*Sqrt[89381671136229/14849462], 8809149/3854, 394}, 
     {3857, Sqrt[1119865871886585/1859074]/2, 8764254/3857, 394}, 
     {3860, (3*Sqrt[249519374489171/3723935])/2, 8713981/3860, 386}, 
     {3863, 2*Sqrt[281379005487329/7459453], 8667846/3863, 377}, 
     {3866, Sqrt[2255895636786437/14942090], 8625617/3866, 372}, 
     {3869, Sqrt[564811703012378/3741323], 8597180/3869, 372}, 
     {3872, Sqrt[2262248019874559/158]/308, 8572721/3872, 733/2}, 
     {3875, Sqrt[1132576571261593/300235]/5, 8549633/3875, 363}, 
     {3878, Sqrt[1134413010182002/7517503], 4259023/1939, 725/2}, 
     {3881, Sqrt[1136680994378479/1882285]/2, 8478340/3881, 362}, 
     {3884, (59*Sqrt[654591936723/3770393])/2, 8432841/3884, 362}, 
     {3887, Sqrt[6755630424469/44689], 645479/299, 358}, 
     {3890, 2*Sqrt[286158186469273/7564105], 4170833/1945, 352}, 
     {3893, 5*Sqrt[45897333801681/7575778], 8293782/3893, 352}, 
     {3896, Sqrt[287464987284654/1896865], 2062875/974, 351}, 
     {3899, Sqrt[164579409879033/1085593], 1173313/557, 345}, 
     {3902, Sqrt[2307325189719649/15221702], 8186555/3902, 340}, 
     {3905, Sqrt[72181808919463/476410], 8169523/3905, 339}, 
     {3908, Sqrt[2312888522827667/3817139]/2, 8144371/3908, 337}, 
     {3911, 3*Sqrt[128639385445469/7646005], 8125306/3911, 335}, 
     {3914, 12*Sqrt[1150161484021/1093963], 4049328/1957, 639/2}, 
     {3917, Sqrt[105575735819445/697226], 8064228/3917, 307}, 
     {3920, Sqrt[145519277795139/19595]/7, 2004021/980, 605/2}, 
     {3923, Sqrt[1167197007719735/7693003], 7965055/3923, 299}, 
     {3926, Sqrt[468343381851573/3081910], 7906121/3926, 283}, 
     {3929, Sqrt[1174482805342009/1929139]/2, 7847635/3929, 272}, 
     {3932, Sqrt[2356618820382659/3864173]/2, 7786801/3932, 271}, 
     {3935, Sqrt[1182514391162278/7740145], 7721772/3935, 270}, 
     {3938, 3*Sqrt[263640008236813/15503906], 7660485/3938, 264}, 
     {3941, 3*Sqrt[66156405472183/3881885], 7593015/3941, 262}, 
     {3944, Sqrt[2390565669069215/3887798]/2, 7525219/3944, 254}, 
     {3947, Sqrt[1200389767053413/7787431], 7451076/3947, 251}, 
     {3950, Sqrt[2410581179617709/623942]/5, 7378921/3950, 250}, 
     {3953, Sqrt[1209814451864351/1952782]/2, 7310537/3953, 248}, 
     {3956, Sqrt[21504072695419/34615]/2, 7235847/3956, 495/2}, 
     {3959, 2*Sqrt[304803480423269/7834861], 7170634/3959, 246}, 
     {3962, 2*Sqrt[305685877068598/7846741], 3556646/1981, 246}, 
     {3965, 7*Sqrt[1924900505599/604510], 542871/305, 245}, 
     {3968, Sqrt[4963003379601/7934]/2, 56351/32, 485/2}, 
     {3971, Sqrt[3424055018498/21835], 363787/209, 240}, 
     {3974, Sqrt[1240941037550630/7894351], 3420169/1987, 240}, 
     {3977, Sqrt[177858701982059/282367]/2, 6776780/3977, 240}, 
     {3980, Sqrt[624207282874726/3959105], 1680244/995, 239}, 
     {3983, 2*Sqrt[44691056340239/1132879], 953041/569, 238}, 
     {3986, Sqrt[2507595934037729/15884210], 6628897/3986, 238}, 
     {3989, Sqrt[1256004102683401/7954066], 6590368/3989, 232}, 
     {3992, Sqrt[629288882116195/3983018], 3272953/1996, 231}, 
     {3995, Sqrt[1260873432965762/7978015], 6505869/3995, 230}, 
     {3998, Sqrt[1262913927686498/7990003], 3235267/1999, 227}, 
     {4001, Sqrt[632525914219519/40010]/10, 6433223/4001, 222}, 
     {4004, Sqrt[2534593810916683/4007003]/2, 6394035/4004, 219}, 
     {4007, Sqrt[1269551612992315/8026021], 6354690/4007, 215}, 
     {4010, Sqrt[2543632212850709/16076090], 6315179/4010, 210}, 
     {4013, Sqrt[1274756154261409/8050078], 6265430/4013, 208}, 
     {4016, (3*Sqrt[284068266093479/1007765])/4, 6207847/4016, 208}, 
     {4019, Sqrt[1282732388744033/164779]/7, 6140529/4019, 202}, 
     {4022, Sqrt[1287746108073582/8086231], 3033674/2011, 201}, 
     {4025, Sqrt[1292552604529233/80983]/10, 5996128/4025, 200}, 
     {4028, Sqrt[34137531454313/213431], 155955/106, 200}, 
     {4031, Sqrt[1302099526714453/8122465], 5854574/4031, 200}, 
     {4034, Sqrt[2611663615141977/16269122], 5794991/4034, 194}, 
     {4037, Sqrt[654689752268527/4073333], 5737458/4037, 193}, 
     {4040, Sqrt[46884251060566/291385], 710249/505, 187}, 
     {4043, 6*Sqrt[36561155554695/8170903], 5625752/4043, 182}, 
     {4046, Sqrt[75384087930011/1618]/17, 796419/578, 361/2}, 
     {4049, Sqrt[120246620326595/186254]/2, 5518082/4049, 179}, 
     {4052, Sqrt[2653820644516595/4103663]/2, 5453183/4052, 179}, 
     {4055, 9*Sqrt[3287179908311/1643897], 1077256/811, 176}, 
     {4058, Sqrt[2670673677364661/16463306], 5323215/4058, 176}, 
     {4061, 2*Sqrt[5771615157538/142135], 5264139/4061, 176}, 
     {4064, Sqrt[671273532995439/1032002]/2, 2603401/2032, 176}, 
     {4067, Sqrt[1346819296981591/168739]/7, 5141104/4067, 173}, 
     {4070, 2*Sqrt[337676021179457/8280415], 2539894/2035, 173}, 
     {4073, Sqrt[1354735353173777/2073157]/2, 5016698/4073, 172}, 
     {4076, Sqrt[679272317431513/166097]/5, 2478019/2038, 335/2}, 
     {4079, 2*Sqrt[167017326106/4079], 4897305/4079, 163}, 
     {4082, 4*Sqrt[85411668928406/8329321], 2415224/2041, 163}, 
     {4085, Sqrt[685568617291614/4170785], 4761852/4085, 163}, 
     {4088, Sqrt[98261086712349/596702], 335257/292, 162}, 
     {4091, Sqrt[276257582850009/1673219], 4614828/4091, 161}, 
     {4094, 2*Sqrt[347105489294927/8378371], 2261799/2047, 160}, 
     {4097, Sqrt[1396081974579573/8194]/32, 4428289/4097, 156}, 
     {4100, (2*Sqrt[175576016033319/168059])/5, 1081684/1025, 154}, 
     {4103, Sqrt[1412834848151431/8415253], 4227303/4103, 153}, 
     {4106, Sqrt[2839920209012701/16855130], 4136143/4106, 153}, 
     {4109, Sqrt[1426035603773681/8439886], 4053418/4109, 153}, 
     {4112, 2*Sqrt[44730299488755/1056527], 497157/514, 149}, 
     {4115, (2*Sqrt[359177978192007/69955])/11, 3901013/4115, 137}, 
     {4118, 5*Sqrt[115316832084901/16953806], 3830453/4118, 131}, 
     {4121, Sqrt[289122234900743/424463]/2, 3766098/4121, 130}, 
     {4124, Sqrt[152606061479217/223727]/2, 3701789/4124, 128}, 
     {4127, 2*Sqrt[363465262451302/8514001], 3637947/4127, 122}, 
     {4130, Sqrt[416658884186267/2436110], 510067/590, 117}, 
     {4133, 3*Sqrt[162528406438735/8538778], 3502949/4133, 115}, 
     {4136, (3*Sqrt[325929437129303/4275590])/2, 3441059/4136, 221/2}, 
     {4139, Sqrt[1470853728039071/8563591], 3376475/4139, 110}, 
     {4142, 3*Sqrt[163895000323154/8576011], 1655784/2071, 107}, 
     {4145, Sqrt[295740591803579/429422]/2, 650581/829, 105}, 
     {4148, Sqrt[741477650560886/4300439], 796865/1037, 191/2}, 
     {4151, Sqrt[1487211162598097/344533]/5, 3121975/4151, 90}, 
     {4154, 2*Sqrt[372917494039006/8625781], 1527240/2077, 88}, 
     {4157, Sqrt[1497646922808415/8638246], 2972611/4157, 86}, 
     {4160, Sqrt[188079206607959/270335]/2, 720619/1040, 171/2}, 
     {4163, Sqrt[1511898854646459/8663203], 2790283/4163, 85}, 
     {4166, Sqrt[216867589373578/1239385], 1353373/2083, 85}, 
     {4169, Sqrt[1523509091895085/2172049]/2, 2629658/4169, 85}, 
     {4172, 2*Sqrt[190937675061311/4350353], 641765/1043, 84}, 
     {4175, Sqrt[61260446010810/348529], 500853/835, 83}, 
     {4178, Sqrt[1535514939040506/8725753], 1220767/2089, 83}, 
     {4181, 2*Sqrt[192465887913219/4369145], 2376527/4181, 78}, 
     {4184, (5*Sqrt[123417416521959/4375418])/2, 2326301/4184, 71}, 
     {4187, Sqrt[1545177485969669/8763391], 2284196/4187, 69}, 
     {4190, Sqrt[1547166553610082/8775955], 1125203/2095, 137/2}, 
     {4193, Sqrt[221357863838505/78469]/4, 315737/599, 64}, 
     {4196, Sqrt[155139071846698/880111], 544630/1049, 60}, 
     {4199, 2*Sqrt[29862930512806/677977], 165938/323, 51}, 
     {4202, 5*Sqrt[62187820237214/8826301], 1063614/2101, 50}, 
     {4205, Sqrt[778403326710919/5255]/29, 2090937/4205, 49}, 
     {4208, Sqrt[3118025662219959/1106441]/4, 2053003/4208, 97/2}, 
     {4211, 9*Sqrt[19282701197149/8864155], 2004428/4211, 48}, 
     {4214, (2*Sqrt[391227179201851/181159])/7, 976979/2107, 48}, 
     {4217, Sqrt[1568412706869563/2222359]/2, 1897104/4217, 48}, 
     {4220, Sqrt[786070577111686/4451045], 459391/1055, 45}, 
     {4223, Sqrt[1575542179963453/8914753], 1782128/4223, 44}, 
     {4226, (2*Sqrt[394574769711494/2113])/65, 867629/2113, 83/2}, 
     {4229, Sqrt[1580529483724251/8940106], 1696917/4229, 40}, 
     {4232, (2*Sqrt[98954985273855/4231])/23, 206266/529, 38}, 
     {4235, (39*Sqrt[1043406253343/74095])/11, 1590437/4235, 38}, 
     {4238, 3*Sqrt[353501628477969/17956406], 1530803/4238, 37}, 
     {4241, Sqrt[1594886296630579/2247730]/2, 1466766/4241, 34}, 
     {4244, Sqrt[3198633740697659/4501823]/2, 1399521/4244, 32}, 
     {4247, Sqrt[1604792798847030/9016381], 1322194/4247, 32}, 
     {4250, (3*Sqrt[178835766757962/361165])/5, 625964/2125, 32}, 
     {4253, 7*Sqrt[16478660630374/4520939], 1175405/4253, 31}, 
     {4256, Sqrt[202760546887723/1131830], 270999/1064, 30}, 
     {4259, 2*Sqrt[407310044039993/9067411], 992742/4259, 29}, 
     {4262, Sqrt[3273882415281281/18160382], 897403/4262, 27}, 
     {4265, Sqrt[411017774736718/2273245], 806349/4265, 27}, 
     {4268, Sqrt[3300319942932187/4552889]/2, 723667/4268, 51/2}, 
     {4271, Sqrt[331014877410099/1823717], 651587/4271, 25}, 
     {4274, Sqrt[1660430127451578/9131401], 287677/2137, 23}, 
     {4277, Sqrt[1665797552888549/9144226], 499015/4277, 20}, 
     {4280, Sqrt[835265842377231/4578530], 214353/2140, 20}, 
     {4283, Sqrt[1674274028633643/9169903], 369044/4283, 20}, 
     {4286, 2*Sqrt[419420595085673/9182755], 156794/2143, 19}, 
     {4289, (3*Sqrt[93349950649897/287363])/4, 268976/4289, 18}, 
     {4292, (9*Sqrt[41564678583683/4604243])/2, 217763/4292, 16}, 
     {4295, Sqrt[88758359034353/485335], 166979/4295, 15}, 
     {4298, Sqrt[482781312518203/2638358], 16081/614, 15}, 
     {4301, Sqrt[153925458023899/33626]/5, 5135/391, 15}, 
     {4304, Sqrt[261021238872235/89039]/4, 241/4304, 29/2}, 
     {4307, 3*Sqrt[188782179288621/9272971], -40660/4307, 14}, 
     {4310, Sqrt[3401966609266009/18571790], -73069/4310, 27/2}, 
     {4313, Sqrt[1702927826713537/47443]/14, -105501/4313, 11}, 
     {4316, Sqrt[3409553509204571/4655885]/2, -135829/4316, 9}, 
     {4319, Sqrt[100373748180434/548513], -159076/4319, 9}, 
     {4322, Sqrt[1707709029623818/9337681], -86812/2161, 8}, 
     {4325, Sqrt[854522528642894/187013]/5, -188207/4325, 7}, 
     {4328, 4*Sqrt[26724205340545/2340907], -25094/541, 5}, 
     {4331, 7*Sqrt[6986736159501/1875323], -217900/4331, 4}, 
     {4334, 46*Sqrt[809573155737/9389611], -115312/2167, 4}, 
     {4337, Sqrt[857223829748253/1175327]/2, -247372/4337, 2}, 
     {4340, 2*Sqrt[214513670247539/4707815], -68246/1085, 2}, 
     {4343, Sqrt[1717748868575991/9428653], -297993/4343, 2}, 
     {4346, Sqrt[687838860992665/3776674], -327943/4346, 3/2}, 
     {4349, 2*Sqrt[215233482998122/4727363], -366729/4349, 1}, 
     {4352, Sqrt[3448265803747903/73967]/16, -405407/4352, 0}, 
     {4355, Sqrt[1726274770099417/9480835], -441554/4355, 0}, 
     {4358, Sqrt[3457807822520529/18987806], -486293/4358, -1}, 
     {4361, Sqrt[1731013470888159/48505]/14, -522206/4361, -1}, 
     {4364, Sqrt[866892542930546/4760033], -142278/1091, -1}, 
     {4367, Sqrt[1736854503647926/9533161], -620209/4367, -1}, 
     {4370, Sqrt[3478676021669841/19092530], -662387/4370, -2}, 
     {4373, Sqrt[870963782834351/4779689], -706498/4373, -2}, 
     {4376, Sqrt[3489621878740727/7658]/50, -755113/4376, -5/2}, 
     {4379, Sqrt[1747392889806462/9585631], -799108/4379, -3}, 
     {4382, 7*Sqrt[5101210106610/1371253], -59914/313, -5}, 
     {4385, Sqrt[1752054471565777/600745]/4, -878781/4385, -5}, 
     {4388, Sqrt[3507334735611019/4812539]/2, -903011/4388, -5}, 
     {4391, 2*Sqrt[438807314307574/9638245], -925223/4391, -5}, 
     {4394, Sqrt[1756845497290938/57109]/13, -474752/2197, -5}, 
     {4397, Sqrt[1758701670023579/9664606], -979935/4397, -6}, 
     {4400, Sqrt[3521702671689199/48389]/20, -1016449/4400, -6}, 
     {4403, 2*Sqrt[440817492115573/9691003], -1057512/4403, -6}, 
     {4406, Sqrt[706275536107165/3881686], -1098575/4406, -6}, 
     {4409, Sqrt[1768189100440711/2429359]/2, -1141253/4409, -6}, 
     {4412, Sqrt[3541329402241547/4865333]/2, -1183505/4412, -6}, 
     {4415, Sqrt[1772385681002222/9743905], -1210234/4415, -7}, 
     {4418, Sqrt[3547521775526917/8834]/47, -1225999/4418, -15/2}, 
     {4421, Sqrt[1775137519738733/9770410], -1241814/4421, -8}, 
     {4424, Sqrt[3553132027824679/4891838]/2, -1259791/4424, -10}, 
     {4427, 2*Sqrt[444477623214554/9796951], -1273245/4427, -11}, 
     {4430, Sqrt[3558264543451481/19620470], -1277713/4430, -11}, 
     {4433, (7*Sqrt[36336778128671/2455882])/2, -1293179/4433, -12}, 
     {4436, Sqrt[3564093266523971/4918415]/2, -1315257/4436, -12}, 
     {4439, Sqrt[1783581470691749/9850141], -1337032/4439, -13}, 
     {4442, Sqrt[3570223207037861/19726922], -1358665/4442, -14}, 
     {4445, Sqrt[81202971618194/448945], -1373417/4445, -17}, 
     {4448, (13*Sqrt[21160582181095/1236266])/4, -1397263/4448, -17}, 
     {4451, (18*Sqrt[5523484883118/396139])/5, -1419218/4451, -17}, 
     {4454, Sqrt[3582426653922997/19833662], -1443121/4454, -17}, 
     {4457, Sqrt[1792981239740859/2482549]/2, -1471418/4457, -19}, 
     {4460, Sqrt[897646857288654/101465]/7, -377747/1115, -19}, 
     {4463, Sqrt[1797643116968914/9956953], -1550788/4463, -19}, 
     {4466, Sqrt[94765946219522/524755], -799780/2233, -20}, 
     {4469, Sqrt[1802746502147681/9983746], -1636869/4469, -21}, 
     {4472, Sqrt[902144356271155/4998578], -829435/2236, -22}, 
     {4475, (4*Sqrt[112853816749763/400423])/5, -1674397/4475, -24}, 
     {4478, 5*Sqrt[13141482404267/1822546], -1685557/4478, -25}, 
     {4481, Sqrt[361634487283065/31367]/8, -1687905/4481, -28}, 
     {4484, (7*Sqrt[73855912635339/5025443])/2, -1699289/4484, -28}, 
     {4487, Sqrt[1810703784720655/10064341], -1699575/4487, -28}, 
     {4490, Sqrt[3623887617084581/4490]/67, -1695207/4490, -28}, 
     {4493, Sqrt[1813162550305173/10091278], -1697303/4493, -28}, 
     {4496, (3*Sqrt[403198875885183/1263095])/4, -1702539/4496, -28}, 
     {4499, Sqrt[1815620114035094/10118251], -1706644/4499, -28}, 
     {4502, Sqrt[3633755329132233/20263502], -1702049/4502, -28}, 
     {4505, Sqrt[1818104560868757/2536315]/2, -1699696/4505, -28}, 
     {4508, Sqrt[3638866093535035/103661]/14, -1712901/4508, -28}, 
     {4511, 2*Sqrt[455177746203694/10172305], -1721775/4511, -32}, 
     {4514, 2*Sqrt[455496789286606/10185841], -865290/2257, -32}, 
     {4517, Sqrt[1823277480887391/10199386], -1741516/4517, -32}, 
     {4520, 2*Sqrt[114047635588357/2553235], -220183/565, -32}, 
     {4523, Sqrt[1826467581935103/10226503], -1788049/4523, -32}, 
     {4526, Sqrt[3656738320801809/819206]/5, -1819317/4526, -36}, 
     {4529, 12*Sqrt[1588870433443/1281707], -1852878/4529, -36}, 
     {4532, Sqrt[83263474313499/466693], -85015/206, -43}, 
     {4535, 9*Sqrt[4526002175941/2056169], -374419/907, -43}, 
     {4538, Sqrt[3668776725159685/20588906], -1860607/4538, -79/2}, 
     {4541, Sqrt[7681066491631/43130], -7728/19, -36}, 
     {4544, Sqrt[524868151511273/46079]/8, -1840625/4544, -34}, 
     {4547, 26*Sqrt[2719379842629/10335331], -1834468/4547, -32}, 
     {4550, 171*Sqrt[5032719149/827918], -367121/910, -32}, 
     {4553, 9*Sqrt[5681410609094/2590657], -1843525/4553, -36}, 
     {4556, Sqrt[3684000108852883/5188145]/2, -1842597/4556, -34}, 
     {4559, Sqrt[1843222801288981/10389961], -1842002/4559, -32}, 
     {4562, Sqrt[3688889795690633/20807282], -1841727/4562, -32}, 
     {4565, Sqrt[83893928003909/473515], -167402/415, -32}, 
     {4568, 3*Sqrt[102613368233219/5215514], -928413/2284, -34}, 
     {4571, 8*Sqrt[28880987460841/10444735], -1870636/4571, -36}, 
     {4574, Sqrt[3699258779367769/20916902], -1875191/4574, -36}, 
     {4577, (3*Sqrt[205652826121109/654511])/4, -1870630/4577, -36}, 
     {4580, Sqrt[926234609505266/5242955], -462444/1145, -32}, 
     {4583, 2*Sqrt[463485419797371/10499653], -1833474/4583, -32}, 
     {4586, 3*Sqrt[206134758322818/10513405], -913334/2293, -32}, 
     {4589, 4*Sqrt[58014514101918/5263583], -1821723/4589, -32}, 
     {4592, Sqrt[928858878385199/1317617]/2, -908249/2296, -30}, 
     {4595, 3*Sqrt[206578330772578/10554715], -1799714/4595, -28}, 
     {4598, (3*Sqrt[206749203352030/87343])/11, -890299/2299, -28}, 
     {4601, (2*Sqrt[116392165599513/105823])/5, -1761641/4601, -28}, 
     {4604, Sqrt[3728055136939331/5298053]/2, -1736517/4604, -25}, 
     {4607, Sqrt[266505548482347/1515703], -1718263/4607, -24}, 
     {4610, Sqrt[1867295577071962/10623745], -846502/2305, -22}, 
     {4613, Sqrt[1868807854651267/10637578], -1674717/4613, -21}, 
     {4616, Sqrt[3740303141331423/5325710]/2, -1663277/4616, -20}, 
     {4619, 6*Sqrt[51989338564071/10665271], -1647237/4619, -19}, 
     {4622, 9*Sqrt[46251984086489/21358262], -1626529/4622, -19}, 
     {4625, Sqrt[1874654093602533/370]/170, -1610197/4625, -19}, 
     {4628, Sqrt[536072588498861/764777]/2, -1589171/4628, -17}, 
     {4631, Sqrt[170737292468181/974615], -141963/421, -17}, 
     {4634, Sqrt[3760364340243857/21469322], -1529477/4634, -17}, 
     {4637, 2*Sqrt[235255966547321/5374283], -1501667/4637, -17}, 
     {4640, Sqrt[753358449850339/269062]/4, -298021/928, -14}, 
     {4643, Sqrt[1884715061613781/10776403], -1481166/4643, -13}, 
     {4646, Sqrt[3771928564228353/21580670], -1476687/4646, -12}, 
     {4649, Sqrt[269605542247989/385867]/2, -1469676/4649, -12}, 
     {4652, Sqrt[3776930277269403/5409113]/2, -1471579/4652, -12}, 
     {4655, Sqrt[1889740346244378/221065]/7, -1480453/4655, -12}, 
     {4658, 2*Sqrt[472802679021111/10846153], -749276/2329, -27/2}, 
     {4661, 39*Sqrt[1244308966273/10860130], -1513735/4661, -14}, 
     {4664, 3*Sqrt[105220919712515/5437058], -764447/2332, -17}, 
     {4667, Sqrt[1895427522276641/10888111], -1546178/4667, -17}, 
     {4670, Sqrt[541969067862743/3114890], -1563917/4670, -17}, 
     {4673, Sqrt[1898654867853081/682258]/4, -1591174/4673, -17}, 
     {4676, (3*Sqrt[105573263750429/218603])/5, -808049/2338, -19}, 
     {4679, 3*Sqrt[211301207790851/10944181], -1631668/4679, -19}, 
     {4682, Sqrt[3806061669196429/21916442], -1642571/4682, -19}, 
     {4685, Sqrt[1904308766902823/10972270], -1651622/4685, -21}, 
     {4688, Sqrt[952795874953759/1373291]/2, -822115/2344, -19}, 
     {4691, 3*Sqrt[211883336034234/11000395], -1632367/4691, -19}, 
     {4694, (3*Sqrt[212034398566038/30511])/19, -810242/2347, -19}, 
     {4697, Sqrt[1909592874912981/2757139]/2, -1613160/4697, -17}, 
     {4700, (11*Sqrt[7896154178446/220853])/5, -401564/1175, -17}, 
     {4703, 3*Sqrt[212488478699390/11056753], -1587769/4703, -17}, 
     {4706, 2*Sqrt[478486367339129/11070865], -784278/2353, -17}, 
     {4709, Sqrt[957751760690634/5542493], -1549055/4709, -14}, 
     {4712, 2*Sqrt[17123159046839/396397], -378319/1178, -27/2}, 
     {4715, 3*Sqrt[213428923814542/11113255], -1465877/4715, -12}, 
     {4718, Sqrt[43234231052993/250054], -1418525/4718, -12}, 
     {4721, (3*Sqrt[107035737470969/1392695])/2, -1375918/4721, -11}, 
     {4724, Sqrt[964226280283330/5577863], -337440/1181, -21/2}, 
     {4727, Sqrt[1930074961056445/11169901], -1328397/4727, -10}, 
     {4730, Sqrt[3863418990701541/22368170], -1306677/4730, -8}, 
     {4733, Sqrt[966566636346187/33131]/13, -1291969/4733, -7}, 
     {4736, Sqrt[3869120108323639/350390]/8, -1277155/4736, -13/2}, 
     {4739, Sqrt[276601320996481/1603813], -179290/677, -6}, 
     {4742, Sqrt[3876578781865161/22481822], -1223485/4742, -6}, 
     {4745, Sqrt[485153979595573/2813785], -1187114/4745, -6}, 
     {4748, Sqrt[3886708800517283/5634689]/2, -1144281/4748, -6}, 
     {4751, Sqrt[1946613716424997/451345]/5, -1094450/4751, -6}, 
     {4754, (2*Sqrt[487420090589305/230569])/7, -523540/2377, -11/2}, 
     {4757, Sqrt[1952706617461981/11312146], -1000253/4757, -5}, 
     {4760, Sqrt[558963856059073/809030]/2, -135079/680, -5}, 
     {4763, Sqrt[1960496311975378/11340703], -886069/4763, -5}, 
     {4766, Sqrt[1966150437707154/11354995], -406125/2383, -5}, 
     {4769, Sqrt[1972016134681359/710581]/4, -736500/4769, -5}, 
     {4772, 9*Sqrt[12216608224719/5691803], -325679/2386, -3}, 
     {4775, (3*Sqrt[220688558481423/455917])/5, -565981/4775, -2}, 
     {4778, Sqrt[1994691380842398/11412253], -235546/2389, -2}, 
     {4781, Sqrt[143194369439427/816185], -52352/683, -2}, 
     {4784, Sqrt[1006857837432815/1430117]/2, -134105/2392, -1}, 
     {4787, 3*Sqrt[224868392659655/11455291], -163156/4787, -1}, 
     {4790, Sqrt[2032388265950358/11469655], -33874/2395, -1}, 
     {4793, Sqrt[2040635185088509/2871007]/2, 25620/4793, -1}, 
     {4796, 2*Sqrt[256078802115923/5749205], 29319/1199, 0}, 
     {4799, Sqrt[2056657718188759/11512801], 209152/4799, 0}, 
     {4802, Sqrt[4127438578532289/9602]/49, 294197/4802, 1/2}, 
     {4805, (38*Sqrt[717256815366/6005])/31, 384008/4805, 1}, 
     {4808, (5*Sqrt[166281789076303/5778014])/2, 469225/4808, 2}, 
     {4811, Sqrt[2085304890465863/11570455], 552040/4811, 2}, 
     {4814, Sqrt[4184222942299513/23169782], 635041/4814, 2}, 
     {4817, Sqrt[2097693233489305/2899834]/2, 708377/4817, 4}, 
     {4820, Sqrt[4208321943905891/5806895]/2, 788927/4820, 4}, 
     {4823, Sqrt[2112240349844215/11628253], 881152/4823, 5}, 
     {4826, 2*Sqrt[21195655312886/465709], 484056/2413, 6}, 
     {4829, Sqrt[2127605028907823/11657206], 1060074/4829, 8}, 
     {4832, Sqrt[4269109403456207/1458962]/4, 1144279/4832, 17/2}, 
     {4835, 2*Sqrt[535544945836743/11686195], 1233241/4835, 9}, 
     {4838, 2*Sqrt[537805189541702/11700703], 665887/2419, 10}, 
     {4841, Sqrt[2161549621007393/24205]/22, 1438156/4841, 13}, 
     {4844, 2*Sqrt[271709967666262/5864873], 388660/1211, 14}, 
     {4847, 2*Sqrt[547284391983186/11744281], 1687680/4847, 14}, 
     {4850, Sqrt[2207233828423842/470353]/5, 916323/2425, 15}, 
     {4853, Sqrt[1113225836160586/5886689], 1982351/4853, 15}, 
     {4856, Sqrt[1123109630242907/5893970], 1067165/2428, 15}, 
     {4859, 2*Sqrt[566915083064455/11802511], 2293019/4859, 15}, 
     {4862, 2*Sqrt[572278359753885/11817091], 1225878/2431, 35/2}, 
     {4865, Sqrt[330357129457839/26410]/8, 373986/695, 18}, 
     {4868, 15*Sqrt[5186726406357/5923139], 1388463/2434, 20}, 
     {4871, 2*Sqrt[588585111685014/11860885], 2931045/4871, 20}, 
     {4874, Sqrt[4749392648801641/23751002], 3085333/4874, 20}, 
     {4877, Sqrt[1198134166672281/5945063], 3244535/4877, 22}, 
     {4880, Sqrt[4830736231971471/1488095]/4, 3393743/4880, 49/2}, 
     {4883, 2*Sqrt[609373141849565/11919403], 3555017/4883, 25}, 
     {4886, 2*Sqrt[615548835225946/11934055], 1863012/2443, 53/2}, 
     {4889, 2*Sqrt[155344941427262/2987179], 3891934/4889, 27}, 
     {4892, Sqrt[5021682625332331/5981693]/2, 4065179/4892, 28}, 
     {4895, 2*Sqrt[633904783252082/11978065], 4236458/4895, 30}, 
     {4898, Sqrt[2560513781540802/11992753], 2204081/2449, 61/2}, 
     {4901, Sqrt[2582864138346981/58]/455, 4570417/4901, 32}, 
     {4904, Sqrt[651493024663714/3005539], 591940/613, 32}, 
     {4907, Sqrt[2627769126986090/12036871], 4895598/4907, 32}, 
     {4910, 8*Sqrt[41379885463558/12051595], 2525323/2455, 33}, 
     {4913, (4*Sqrt[20851541976377/5219])/17, 5206373/4913, 36}, 
     {4916, 232*Sqrt[4999421462/1208107], 1341705/1229, 38}, 
     {4919, Sqrt[2712000026033557/12095821], 5524207/4919, 38}, 
     {4922, 3*Sqrt[86688309713911/3460166], 5671561/4922, 39}, 
     {4925, (3*Sqrt[152643458708809/242507])/5, 5811301/4925, 41}, 
     {4928, Sqrt[5528108028002727/379379]/8, 5949061/4928, 42}, 
     {4931, Sqrt[2780002050285849/12154915], 6084427/4931, 42}, 
     {4934, Sqrt[5589899695170013/24339422], 6215083/4934, 43}, 
     {4937, Sqrt[2811440884614959/3046129]/2, 6352931/4937, 45}, 
     {4940, 2*Sqrt[5435061946838/93841], 24934/19, 93/2}, 
     {4943, 2*Sqrt[709996476666986/12214153], 6607532/4943, 48}, 
     {4946, 2*Sqrt[712953774195218/12228985], 3361120/2473, 48}, 
     {4949, Sqrt[2862846197501519/249874]/7, 6832541/4949, 48}, 
     {4952, 10*Sqrt[7182541652919/3064669], 867218/619, 49}, 
     {4955, Sqrt[2882860984194647/12273535], 7040851/4955, 50}, 
     {4958, 2*Sqrt[723165620145547/12288403], 3571847/2479, 101/2}, 
     {4961, Sqrt[2901283569337759/6355]/44, 7239202/4961, 57}, 
     {4964, Sqrt[1454770942704159/6159083], 3666099/2482, 127/2}, 
     {4967, Sqrt[2916128598111910/12333061], 7412774/4967, 68}, 
     {4970, 3*Sqrt[324612585507558/12347965], 3741657/2485, 69}, 
     {4973, 3*Sqrt[325303510297089/12362878], 7561086/4973, 69}, 
     {4976, Sqrt[5865129326552199/61889]/20, 7626477/4976, 151/2}, 
     {4979, 2*Sqrt[734292535620143/12392731], 7689459/4979, 83}, 
     {4982, 2*Sqrt[735575084574542/12407671], 3878814/2491, 83}, 
     {4985, Sqrt[2946710519896573/3105655]/2, 7818563/4985, 83}, 
     {4988, 6*Sqrt[40987656306443/6218789], 1969848/1247, 85}, 
     {4991, 3*Sqrt[328371382098619/12452545], 7938149/4991, 85}, 
     {4994, Sqrt[5916826833321817/24935042], 7981893/4994, 85}, 
     {4997, 5*Sqrt[59223291717658/6241253], 8020707/4997, 85}, 
     {5000, Sqrt[5927845835127351/9998]/50, 8059657/5000, 86}, 
     {5003, 2*Sqrt[741642230436033/12512503], 8096175/5003, 86}, 
     {5006, 36*Sqrt[2291056661321/12527515], 4066310/2503, 90}, 
     {5009, Sqrt[2972612990332385/3135634]/2, 8181473/5009, 93}, 
     {5012, Sqrt[1487920195941115/6278783], 4113927/2506, 203/2}, 
     {5015, Sqrt[2978472970589107/12572605], 8264104/5015, 107}, 
     {5018, 2*Sqrt[25696970200414/434057], 4147732/2509, 217/2}, 
     {5021, Sqrt[2982804187076963/12602710], 8314385/5021, 110}, 
     {5024, (3*Sqrt[165811699017255/1577222])/2, 4161783/2512, 113}, 
     {5027, Sqrt[2986403543553302/12632851], 8327951/5027, 115}, 
     {5030, Sqrt[5976426693734921/25295870], 8337407/5030, 117}, 
     {5033, Sqrt[1495012083972623/6331514], 8346914/5033, 122}, 
     {5036, Sqrt[5983640618673139/6339065]/2, 8349573/5036, 239/2}, 
     {5039, Sqrt[2993967763774665/12693241], 8334616/5039, 117}, 
     {5042, Sqrt[5992576555437669/5042]/71, 8314501/5042, 113}, 
     {5045, 3*Sqrt[333149229923613/12723490], 8301836/5045, 110}, 
     {5048, Sqrt[6000511033621887/129986]/14, 8294363/5048, 217/2}, 
     {5051, Sqrt[3002234050145134/510151]/5, 8284446/5051, 107}, 
     {5054, Sqrt[6008416458025505/70742]/19, 8274741/5054, 203/2}, 
     {5057, Sqrt[3006251411401763/799006]/4, 8262484/5057, 98}, 
     {5060, Sqrt[546961178053601/581785]/2, 750043/460, 191/2}, 
     {5063, 3*Sqrt[334492252191758/12814453], 8235640/5063, 90}, 
     {5066, 7*Sqrt[122951020179329/25659290], 8231123/5066, 90}, 
     {5069, Sqrt[3014167889589207/12844846], 8226697/5069, 90}, 
     {5072, Sqrt[6031930086928847/1607507]/4, 8232735/5072, 183/2}, 
     {5075, (6*Sqrt[83828414201937/515011])/5, 8228944/5075, 90}, 
     {5078, 44*Sqrt[1559805027539/12890503], 4109921/2539, 88}, 
     {5081, Sqrt[3021610795341703/3226435]/2, 8218425/5081, 90}, 
     {5084, Sqrt[1511819616604757/6460493], 4103349/2542, 86}, 
     {5087, 2*Sqrt[756416749598691/12936241], 8194995/5087, 86}, 
     {5090, 11*Sqrt[10008934386233/5180602], 1636599/1018, 85}, 
     {5093, 16*Sqrt[5917145483629/6483389], 8178075/5093, 85}, 
     {5096, Sqrt[1212549675712211/26494]/14, 8183293/5096, 85}, 
     {5099, 2*Sqrt[758328871761273/12997351], 8201187/5099, 85}, 
     {5102, 2*Sqrt[758790610219722/13012651], 4106868/2551, 86}, 
     {5105, Sqrt[69024985269207/296090], 8231427/5105, 86}, 
     {5108, Sqrt[6078521710105867/6521639]/2, 8257001/5108, 90}, 
     {5111, 2*Sqrt[760340543634543/13058605], 8280088/5111, 93}, 
     {5114, Sqrt[3043611533519894/13073941], 4154006/2557, 98}, 
     {5117, Sqrt[3046188245509433/13089286], 8343131/5117, 98}, 
     {5120, Sqrt[304811879938267/5119]/16, 836049/512, 106}, 
     {5123, Sqrt[3049961013385922/13120003], 8372624/5123, 107}, 
     {5126, (2*Sqrt[152590163288071/105083])/5, 4192336/2563, 110}, 
     {5129, Sqrt[1526863319466791/6575378], 8401681/5129, 111}, 
     {5132, 6*Sqrt[42443699540698/6583073], 2107214/1283, 116}, 
     {5135, 2*Sqrt[152891927097322/2636309], 1688602/1027, 117}, 
     {5138, Sqrt[6119301800921273/26393906], 8452109/5138, 124}, 
     {5141, Sqrt[3061464498272737/13212370], 8461316/5141, 130}, 
     {5144, Sqrt[1531651488290443/6613898], 4236555/2572, 261/2}, 
     {5147, 4*Sqrt[191570415705362/13243231], 8479717/5147, 131}, 
     {5150, (3*Sqrt[681539090291949/1060694])/5, 8483847/5150, 131}, 
     {5153, Sqrt[3068788805715323/829633]/4, 8480108/5153, 130}, 
     {5156, Sqrt[1535406420905623/6644795], 4234417/2578, 128}, 
     {5159, Sqrt[438958931067443/1900723], 1208983/737, 122}, 
     {5162, Sqrt[6149208813107677/26641082], 8457367/5162, 117}, 
     {5165, Sqrt[307640753564069/1333603], 1691996/1033, 117}, 
     {5168, Sqrt[324021990830437/87839]/4, 445411/272, 116}, 
     {5171, Sqrt[616006601318037/2673407], 8473170/5171, 117}, 
     {5174, Sqrt[3081855511261922/13382551], 4241655/2587, 124}, 
     {5177, (3*Sqrt[342631012725951/3349519])/2, 8493526/5177, 130}, 
     {5180, Sqrt[6170962706147091/6706805]/2, 8496207/5180, 128}, 
     {5183, 2*Sqrt[771831125129921/13429153], 8496068/5183, 126}, 
     {5186, Sqrt[617824663889242/2688941], 4250486/2593, 128}, 
     {5189, Sqrt[3090975599651807/13460266], 8513731/5189, 130}, 
     {5192, Sqrt[6185965484868127/6737918]/2, 8534155/5192, 131}, 
     {5195, (2*Sqrt[773788924422683/275335])/7, 8559871/5195, 137}, 
     {5198, 4*Sqrt[193579051952783/13507003], 4291490/2599, 149}, 
     {5201, Sqrt[238418524762139/10402]/10, 8608744/5201, 153}, 
     {5204, Sqrt[36067782659827/1301]/11, 4320017/2602, 153}, 
     {5207, 6*Sqrt[2102876962139/330581], 211240/127, 153}, 
     {5210, Sqrt[3105766664713542/13569445], 4338192/2605, 154}, 
     {5213, Sqrt[1553795830384287/6792539], 8686734/5213, 156}, 
     {5216, Sqrt[55527508574513/242870], 2176199/1304, 160}, 
     {5219, 21*Sqrt[7055474822147/13616371], 8720523/5219, 161}, 
     {5222, Sqrt[135376190044786/592697], 4373316/2611, 162}, 
     {5225, Sqrt[1558011586532959/272954]/5, 8777517/5225, 163}, 
     {5228, Sqrt[1559254306997935/6831689], 4405287/2614, 163}, 
     {5231, Sqrt[624120328454845/2735813], 8833184/5231, 163}, 
     {5234, Sqrt[6244904202155357/27389522], 8845743/5234, 335/2}, 
     {5237, 3*Sqrt[173569680788019/6855233], 8850593/5237, 168}, 
     {5240, Sqrt[480933978433107/527930]/2, 8850113/5240, 165}, 
     {5243, (2*Sqrt[781980033774162/280447])/7, 8862643/5243, 168}, 
     {5246, 2*Sqrt[782463830207402/13757635], 4440043/2623, 345/2}, 
     {5249, Sqrt[782947444004657/215209]/4, 8897456/5249, 173}, 
     {5252, 10*Sqrt[1205400448785/530351], 171639/101, 349/2}, 
     {5255, Sqrt[627205301202947/2760977], 1788955/1051, 176}, 
     {5258, 3*Sqrt[697373286078457/27641306], 8969881/5258, 176}, 
     {5261, Sqrt[1570215205947659/6918215], 8997591/5261, 176}, 
     {5264, Sqrt[56114672871423/247361], 322049/188, 355/2}, 
     {5267, Sqrt[3144805667581090/13868011], 9047707/5267, 179}, 
     {5270, Sqrt[1259241498417129/5553526], 1818757/1054, 179}, 
     {5273, 20*Sqrt[1969493750299/3474907], 9137163/5273, 182}, 
     {5276, Sqrt[6307864878056939/278309]/10, 9175233/5276, 183}, 
     {5279, 3*Sqrt[350820810423290/13931281], 9223758/5279, 190}, 
     {5282, Sqrt[6320328822278269/27894242], 9261795/5282, 387/2}, 
     {5285, Sqrt[45177180440757/199471], 265405/151, 194}, 
     {5288, Sqrt[372279185256927/411142]/2, 9308091/5288, 200}, 
     {5291, Sqrt[3166206111907529/26455]/23, 9318670/5291, 200}, 
     {5294, 2*Sqrt[792022214788439/14010571], 4665776/2647, 401/2}, 
     {5297, Sqrt[1584958547891319/1753307]/2, 9341648/5297, 201}, 
     {5300, Sqrt[63434699260202/280847], 93436/53, 403/2}, 
     {5303, 2*Sqrt[793408693540411/14058253], 9340203/5303, 201}, 
     {5306, 3*Sqrt[352846055195238/14074165], 4665771/2653, 401/2}, 
     {5309, Sqrt[3178079209416679/14090086], 9309565/5309, 200}, 
     {5312, Sqrt[1590270881889287/440813]/4, 4643819/2656, 200}, 
     {5315, Sqrt[3182437998938373/14121955], 9284483/5315, 200}, 
     {5318, Sqrt[3184322251282034/14137903], 4648630/2659, 200}, 
     {5321, Sqrt[796606516344273/3538465], 9320733/5321, 200}, 
     {5324, Sqrt[6376657959189163/58553]/22, 9336289/5324, 201}, 
     {5327, Sqrt[3190392462803110/14185801], 9357521/5327, 202}, 
     {5330, Sqrt[6385694495769889/5330]/73, 9389739/5330, 208}, 
     {5333, Sqrt[1597962859739126/7108889], 9432800/5333, 208}, 
     {5336, Sqrt[1599423731794487/7116890], 4736743/2668, 210}, 
     {5339, Sqrt[168498916617071/749989], 500484/281, 215}, 
     {5342, Sqrt[130793323142701/582278], 9550417/5342, 219}, 
     {5345, Sqrt[3207383762012683/892615]/4, 9591473/5345, 222}, 
     {5348, Sqrt[6420717961547963/7148939]/2, 9632999/5348, 227}, 
     {5351, Sqrt[3213522687426539/572557]/5, 9677314/5351, 228}, 
     {5354, Sqrt[6433794024987065/28659962], 9724215/5354, 228}, 
     {5357, Sqrt[3221145091818481/14346046], 9781875/5357, 230}, 
     {5360, 7*Sqrt[8233301729311/1795265], 2464571/1340, 231}, 
     {5363, Sqrt[3234784604752193/14378203], 9942342/5363, 232}, 
     {5366, 2*Sqrt[810523073519278/14394295], 5013120/2683, 238}, 
     {5369, Sqrt[3250594090423165/3602599]/2, 10118247/5369, 238}, 
     {5372, Sqrt[159045300990715/175933]/2, 10218483/5372, 239}, 
     {5375, Sqrt[3271702040119538/577705]/5, 10326868/5375, 240}, 
     {5378, Sqrt[6570147850982489/28917506], 10445971/5378, 240}, 
     {5381, 2*Sqrt[412231848512683/7237445], 10562253/5381, 240}, 
     {5384, Sqrt[6621344428032751/7245518]/2, 10678715/5384, 485/2}, 
     {5387, Sqrt[3323003924970362/14507191], 10792703/5387, 245}, 
     {5390, 16*Sqrt[265935356602/296395], 779252/385, 246}, 
     {5393, 2*Sqrt[104649270096097/1817441], 11026323/5393, 246}, 
     {5396, Sqrt[6722196013818907/7277855]/2, 11140257/5396, 495/2}, 
     {5399, 2*Sqrt[842984927240673/14571901], 11246263/5399, 248}, 
     {5402, 5*Sqrt[135311737226498/14588101], 5676167/2701, 250}, 
     {5405, 2*Sqrt[60609337688773/1043165], 11461022/5405, 251}, 
     {5408, Sqrt[6809975143102927/10814]/52, 11567159/5408, 254}, 
     {5411, Sqrt[3414904855703983/14636755], 11667875/5411, 262}, 
     {5414, 3*Sqrt[380532811737954/14652991], 5884216/2707, 264}, 
     {5417, (31*Sqrt[3574056154471/3667309])/2, 11868885/5417, 270}, 
     {5420, Sqrt[1721404111500911/7342745], 5979247/2710, 271}, 
     {5423, 5*Sqrt[137990576066830/14701753], 12039788/5423, 272}, 
     {5426, Sqrt[6913428016958489/1177442]/5, 12121031/5426, 283}, 
     {5429, Sqrt[3464835702896335/14734306], 12210511/5429, 299}, 
     {5432, Sqrt[6948461945454959/7375298]/2, 12308101/5432, 605/2}, 
     {5435, 21*Sqrt[718632589047/1342445], 12419451/5435, 307}, 
     {5438, Sqrt[6997958478944857/29566406], 12536277/5438, 639/2}, 
     {5441, Sqrt[1755941615767363/462485]/4, 12653162/5441, 335}, 
     {5444, 2*Sqrt[440165136697909/7407923], 3187752/1361, 337}, 
     {5447, Sqrt[3529872154022819/14832181], 12843303/5447, 339}, 
     {5450, Sqrt[3537980816806202/593941]/5, 6466343/2725, 340}, 
     {5453, Sqrt[3544210523183291/14864878], 13008358/5453, 345}, 
     {5456, Sqrt[443806423788653/1860155], 3271029/1364, 351}, 
     {5459, 2*Sqrt[889275366895890/14897611], 13162869/5459, 352}, 
     {5462, 10*Sqrt[35661426800786/14913991], 6629050/2731, 352}, 
     {5465, Sqrt[715403741905135/746519]/2, 2672856/1093, 358}, 
     {5468, Sqrt[7172946710230387/7473389]/2, 13462221/5468, 362}, 
     {5471, Sqrt[3595512962781787/14963185], 13557444/5471, 362}, 
     {5474, Sqrt[1029873456504915/4279886], 1950385/782, 725/2}, 
     {5477, (15*Sqrt[8032161603817/5477])/37, 13753388/5477, 363}, 
     {5480, (3*Sqrt[805320457847671/7506230])/2, 13851419/5480, 733/2}, 
     {5483, Sqrt[3633412204616669/15028903], 13949454/5483, 372}, 
     {5486, Sqrt[7285765669998521/30090710], 14047491/5486, 372}, 
     {5489, Sqrt[3651054971141029/76846]/14, 14137296/5489, 374}, 
     {5492, Sqrt[7320117699116747/26087]/34, 14232549/5492, 751/2}, 
     {5495, Sqrt[3669098106982983/15094765], 14327762/5495, 386}, 
     {5498, Sqrt[7356278112174601/30222506], 14422985/5498, 390}, 
     {5501, (2*Sqrt[461007457294942/302555])/5, 14523702/5501, 394}, 
     {5504, Sqrt[462189141266735/473258]/2, 3655409/1376, 394}, 
     {5507, 2*Sqrt[926418654173407/15160771], 14711367/5507, 394}, 
     {5510, Sqrt[128094292623578/523355], 255288/95, 397}, 
     {5513, Sqrt[286479369160195/292189]/2, 14904900/5513, 398}, 
     {5516, Sqrt[7468407820575467/7605185]/2, 15005919/5516, 398}, 
     {5519, 3*Sqrt[415921125373594/15226921], 15101420/5519, 398}, 
     {5522, Sqrt[340906134841946/1385771], 690016/251, 399}, 
     {5525, Sqrt[3754692320553103/610402]/5, 15242638/5525, 399}, 
     {5528, 4*Sqrt[58732961233615/3819157], 3824849/1382, 801/2}, 
     {5531, 66*Sqrt[24678224618/436949], 15347759/5531, 402}, 
     {5534, Sqrt[7532869722204185/30619622], 15401599/5534, 807/2}, 
     {5537, Sqrt[3771143790441949/19549]/28, 15463723/5537, 404}, 
     {5540, 11*Sqrt[538247928466/264535], 3884937/1385, 407}, 
     {5543, Sqrt[3784827158986553/15359653], 15624236/5543, 408}, 
     {5546, 2*Sqrt[948261168313298/15376285], 7857157/2773, 821/2}, 
     {5549, Sqrt[3801262414986623/15392926], 15804391/5549, 413}, 
     {5552, Sqrt[272107163509361/275171]/2, 7947303/2776, 827/2}, 
     {5555, Sqrt[3817758211330738/15426235], 15984952/5555, 414}, 
     {5558, 9*Sqrt[6745127881954/2206129], 1147447/397, 415}, 
     {5561, 3*Sqrt[106376119658421/3864895], 16129593/5561, 416}, 
     {5564, 7*Sqrt[3009882987183/595241], 622881/214, 420}, 
     {5567, 2*Sqrt[87286242084614/1408451], 16268669/5567, 420}, 
     {5570, Sqrt[1538520685392381/6203866], 3267935/1114, 420}, 
     {5573, Sqrt[1925402571532086/7763189], 16399504/5573, 420}, 
     {5576, Sqrt[7708302994669239/310862]/10, 16445359/5576, 421}, 
     {5579, 5*Sqrt[22046756817907/2222833], 2357084/797, 421}, 
     {5582, 3*Sqrt[858374911276753/31153142], 16559429/5582, 427}, 
     {5585, (3*Sqrt[214928194431241/1949165])/2, 16633322/5585, 430}, 
     {5588, (3*Sqrt[861374710904043/7805039])/2, 16718327/5588, 432}, 
     {5591, Sqrt[3884473325904983/15626845], 16808838/5591, 434}, 
     {5594, 2*Sqrt[972982130506291/15643621], 8446836/2797, 437}, 
     {5597, Sqrt[1949510872748591/7830203], 16975898/5597, 443}, 
     {5600, (5*Sqrt[3126216031823/78386])/2, 1706939/560, 443}, 
     {5603, Sqrt[3919991189467358/15694003], 17182473/5603, 444}, 
     {5606, Sqrt[1573326121617481/6284326], 17301239/5606, 889/2}, 
     {5609, 19*Sqrt[5467915346941/7863818], 17425698/5609, 448}, 
     {5612, Sqrt[7925899202054131/7872233]/2, 17552891/5612, 901/2}, 
     {5615, Sqrt[795996399298553/3152261], 3537697/1123, 456}, 
     {5618, Sqrt[7998133185445769/11234]/53, 17832491/5618, 461}, 
     {5621, Sqrt[2010186581059751/7897505], 17985047/5621, 462}, 
     {5624, Sqrt[8073496128919703/7905938]/2, 18117825/5624, 939/2}, 
     {5627, Sqrt[4051868596179591/15828751], 18245040/5627, 473}, 
     {5630, Sqrt[4068281679852158/15845635], 9188991/2815, 478}, 
     {5633, Sqrt[4086737538058393/61963]/16, 18519466/5633, 489}, 
     {5636, Sqrt[2053301356241378/162035]/7, 4666648/1409, 981/2}, 
     {5639, Sqrt[4129527911838545/15896341], 18825063/5639, 492}, 
     {5642, Sqrt[4150948769637638/15913261], 9489021/2821, 985/2}, 
     {5645, Sqrt[591629223509/2258], 3827353/1129, 493}, 
     {5648, Sqrt[8389211179888543/1993391]/4, 19286889/5648, 989/2}, 
     {5651, Sqrt[4211726761713251/638563]/5, 19422854/5651, 496}, 
     {5654, Sqrt[8451456972575073/31962062], 19544719/5654, 995/2}, 
     {5657, (3*Sqrt[471014169045389/3999499])/2, 19663827/5657, 501}, 
     {5660, (9*Sqrt[104986603055379/8007485])/2, 19780119/5660, 501}, 
     {5663, 2*Sqrt[1065927980695749/16031953], 19890880/5663, 504}, 
     {5666, 7*Sqrt[87255576782042/16048945], 10000971/2833, 1019/2}, 
     {5669, Sqrt[4289067711441083/16065946], 20121754/5669, 512}, 
     {5672, 3*Sqrt[119516781528862/4020739], 2530191/709, 513}, 
     {5675, Sqrt[4316110320760738/643999]/5, 20361157/5675, 515}, 
     {5678, Sqrt[8661628142600253/32234006], 20486451/5678, 1031/2}, 
     {5681, Sqrt[2172156946680309/2016755]/2, 20606046/5681, 516}, 
     {5684, Sqrt[8708198433191491/164807]/14, 20705785/5684, 522}, 
     {5687, Sqrt[4362949522894274/133621]/11, 20799784/5687, 522}, 
     {5690, 7*Sqrt[178406865262941/32370410], 20888109/5690, 522}, 
     {5693, Sqrt[2188198837199787/8101139], 20956386/5693, 524}, 
     {5696, Sqrt[8763084544995407/506855]/8, 21021977/5696, 1051/2}, 
     {5699, Sqrt[4387337843543979/16236451], 21093261/5699, 527}, 
     {5702, Sqrt[8787564695192837/32507102], 21170221/5702, 1055/2}, 
     {5705, Sqrt[1100341366623287/4067665], 21255728/5705, 529}, 
     {5708, (11*Sqrt[72875304849739/8143889])/2, 21341285/5708, 531}, 
     {5711, 2*Sqrt[1103687128937287/16304905], 21412534/5711, 532}, 
     {5714, 41*Sqrt[2629706563110/16322041], 10741874/2857, 532}, 
     {5717, Sqrt[4426973824523315/16339186], 21560646/5717, 533}, 
     {5720, 2*Sqrt[276955475701183/4089085], 2702186/715, 1071/2}, 
     {5723, Sqrt[4437072166841427/16373503], 21688663/5723, 537}, 
     {5726, Sqrt[4443507019420734/655627]/5, 10882769/2863, 545}, 
     {5729, Sqrt[1112159648844017/1025491]/2, 21830987/5729, 545}, 
     {5732, Sqrt[2228117200244443/8212523], 10958287/2866, 1105/2}, 
     {5735, Sqrt[143970341643593/530395], 709562/185, 583}, 
     {5738, Sqrt[4467960367805914/16459453], 11029525/2869, 583}, 
     {5741, 3*Sqrt[70992781097891/2353810], 22118907/5741, 584}, 
     {5744, Sqrt[559524096219845/2061737], 5541811/1436, 586}, 
     {5747, (44*Sqrt[2313689544197/97699])/13, 22206935/5747, 586}, 
     {5750, (7*Sqrt[91477801879682/661135])/5, 11123304/2875, 591}, 
     {5753, Sqrt[2242760659585091/8272814], 22286276/5753, 596}, 
     {5756, Sqrt[8980206428460171/8281445]/2, 22346085/5756, 602}, 
     {5759, 33*Sqrt[4127641581139/16580161], 22408879/5759, 602}, 
     {5762, Sqrt[1286038668506451/4742126], 22483273/5762, 603}, 
     {5765, 4*Sqrt[140821813812651/8307365], 22549006/5765, 608}, 
     {5768, Sqrt[9025566960950655/8316014]/2, 22626259/5768, 609}, 
     {5771, Sqrt[4519271517146579/16649335], 22703531/5771, 615}, 
     {5774, Sqrt[4527385985030430/16666651], 11396214/2887, 1233/2}, 
     {5777, Sqrt[2268657201558469/5777]/38, 22892903/5777, 630}, 
     {5780, (3*Sqrt[252624822148591/28895])/17, 11496701/2890, 630}, 
     {5783, Sqrt[4554905542994090/341197]/7, 23079386/5783, 639}, 
     {5786, 2*Sqrt[1140182206496293/16736005], 11575426/2893, 639}, 
     {5789, Sqrt[326134602086349/1196669], 3316642/827, 653}, 
     {5792, Sqrt[9144005748136351/2096342]/4, 23290751/5792, 1313/2}, 
     {5795, 2*Sqrt[228962412364138/3357623], 4674755/1159, 664}, 
     {5798, Sqrt[9170156266193621/33611006], 23445301/5798, 666}, 
     {5801, Sqrt[2295280728235649/336458]/5, 23514022/5801, 678}, 
     {5804, Sqrt[9190334507885291/8420153]/2, 23574049/5804, 692}, 
     {5807, 7*Sqrt[93884413876761/16857721], 23639819/5807, 697}, 
     {5810, Sqrt[4606158267447222/16875145], 11855638/2905, 698}, 
     {5813, Sqrt[4611611482847787/16892578], 23779718/5813, 700}, 
     {5816, 3*Sqrt[256503125004063/8455010], 11924043/2908, 702}, 
     {5819, Sqrt[4622494848946657/31999]/23, 23916395/5819, 706}, 
     {5822, Sqrt[4627362973901846/16944931], 11989418/2911, 709}, 
     {5825, Sqrt[185256221192621/42406]/4, 4806506/1165, 712}, 
     {5828, Sqrt[9269006281838803/8489939]/2, 24071677/5828, 1425/2}, 
     {5831, Sqrt[927465520801478/69377]/7, 24104922/5831, 713}, 
     {5834, 2*Sqrt[1160198059987243/17014861], 12074930/2917, 1447/2}, 
     {5837, Sqrt[2322207937398242/8516183], 24197711/5837, 725}, 
     {5840, Sqrt[2324359474850071/2131235]/2, 12127167/2920, 737}, 
     {5843, Sqrt[4652182536197234/17067403], 24299251/5843, 748}, 
     {5846, Sqrt[9309674448922373/34169870], 24326627/5846, 748}, 
     {5849, 7*Sqrt[1397774303977/251507], 24351144/5849, 748}, 
     {5852, Sqrt[490504167203737/450527]/2, 1282311/308, 755}, 
     {5855, Sqrt[4662447635552518/17137585], 24391373/5855, 755}, 
     {5858, 3*Sqrt[1036690180438165/34310306], 24418829/5858, 772}, 
     {5861, Sqrt[933504290280537/3434546], 24434487/5861, 776}, 
     {5864, Sqrt[9340448075833071/8595158]/2, 24429563/5864, 772}, 
     {5867, Sqrt[4673066186027378/17207911], 24421771/5867, 755}, 
     {5870, 2*Sqrt[233845606082977/3445103], 2439634/587, 755}, 
     {5873, (5*Sqrt[93640452695935/2155391])/2, 24356239/5873, 748}, 
     {5876, (2*Sqrt[585727501583806/345215])/5, 6082696/1469, 748}, 
     {5879, Sqrt[4689422622936899/17278381], 24308300/5879, 748}, 
     {5882, Sqrt[9387992451871781/34592042], 24274081/5882, 737}, 
     {5885, Sqrt[2350422060882851/8656835], 24219186/5885, 725}, 
     {5888, (5*Sqrt[53811217761905/23])/464, 24158433/5888, 1447/2}, 
     {5891, 2*Sqrt[1179039862295227/17348995], 24097756/5891, 713}, 
     {5894, 2*Sqrt[1180563883313114/17366671], 12024415/2947, 1425/2}, 
     {5897, 2*Sqrt[295569153260009/4346089], 23993918/5897, 712}, 
     {5900, Sqrt[94744108438051/348041], 2393013/590, 709}, 
     {5903, Sqrt[4747756199574103/17419753], 23851591/5903, 706}, 
     {5906, Sqrt[4758305829462394/17437465], 11886530/2953, 702}, 
     {5909, Sqrt[2384143944299342/8727593], 23697571/5909, 700}, 
     {5912, 25*Sqrt[1910044567306/4368229], 2955359/739, 698}, 
     {5915, (23*Sqrt[9037502650613/103495])/13, 23597114/5915, 697}, 
     {5918, 2*Sqrt[108771182710171/1591673], 1070783/269, 692}, 
     {5921, Sqrt[2395102372508599/2190770]/2, 23526108/5921, 678}, 
     {5924, 5*Sqrt[95889244893053/8771963], 11747579/2962, 666}, 
     {5927, Sqrt[4798719709611535/17561701], 23464213/5927, 664}, 
     {5930, Sqrt[873366810103111/65230]/7, 23427303/5930, 1313/2}, 
     {5933, Sqrt[4808613323877859/17597278], 23387391/5933, 653}, 
     {5936, Sqrt[1924803872599323/440377]/4, 23368259/5936, 639}, 
     {5939, Sqrt[4814717782464847/17632891], 23363905/5939, 639}, 
     {5942, 5*Sqrt[385384572173409/35301422], 23365413/5942, 1269/2}, 
     {5945, Sqrt[2409964674944371/8834270], 23364004/5945, 630}, 
     {5948, 11*Sqrt[19929196193559/8843189], 11676817/2974, 624}, 
     {5951, Sqrt[4825576172212126/708169]/5, 23349202/5951, 615}, 
     {5954, 6*Sqrt[134123026641573/17722081], 11670872/2977, 612}, 
     {5957, Sqrt[2416239343357237/8869973], 23313362/5957, 609}, 
     {5960, 2*Sqrt[302282898058033/4439455], 2910626/745, 606}, 
     {5963, Sqrt[4839940077957433/17775703], 23265618/5963, 602}, 
     {5966, Sqrt[1937209157721613/7117438], 23252145/5966, 602}, 
     {5969, Sqrt[2423052700639413/2226437]/2, 23238682/5969, 602}, 
     {5972, 2*Sqrt[606072041374823/8914703], 5811542/1493, 602}, 
     {5975, Sqrt[4851288311334317/713893]/5, 23241729/5975, 596}, 
     {5978, (45*Sqrt[4793988176785/729194])/7, 23240293/5978, 591}, 
     {5981, 2*Sqrt[607047979754382/8941595], 23247825/5981, 596}, 
     {5984, (5*Sqrt[97180190699415/2237642])/2, 11623177/2992, 586}, 
     {5987, Sqrt[4861863994338434/17919091], 23238887/5987, 586}, 
     {5990, Sqrt[43052633211426/158735], 11612709/2995, 585}, 
     {5993, Sqrt[374435484115731/345289]/2, 1786226/461, 583}, 
     {5996, Sqrt[2435187030301238/8986505], 5804121/1499, 583}, 
     {5999, Sqrt[696123752573761/2570143], 3318149/857, 583}}
